# Supplementary material for: Tether-directed synthesis of highly substituted oxasilacycles via an intramolecular allylation employing allylsilanes
Source: PubMed Central journal article supplement (PMC1810303; doi:10.1186/1860-5397-3-6), 2007-02-08

## Additional File 2

**Tether-directed synthesis of highly substituted oxasilacycles *via* an intramolecular allylation employing allylsilanes**

Peter J. Jervis and Liam R. Cox\*

email: l.r.cox@bham.ac.uk

**<sup>1</sup>H-NMR and <sup>13</sup>C-NMR Spectra for the following compounds:**

**5b, 6b, 7b, *syn*-8b, *anti*-8b, *syn*-11b, *anti*-11b, *syn*-4b, *anti*-4b, *syn*-9a, *anti*-9a,**

***syn*-12a, *anti*-12a, *syn*-4a, *anti*-4a, *syn*-13b, *anti*-13b, *syn*-13a, *anti*-13a**

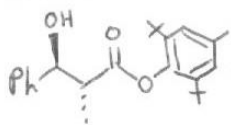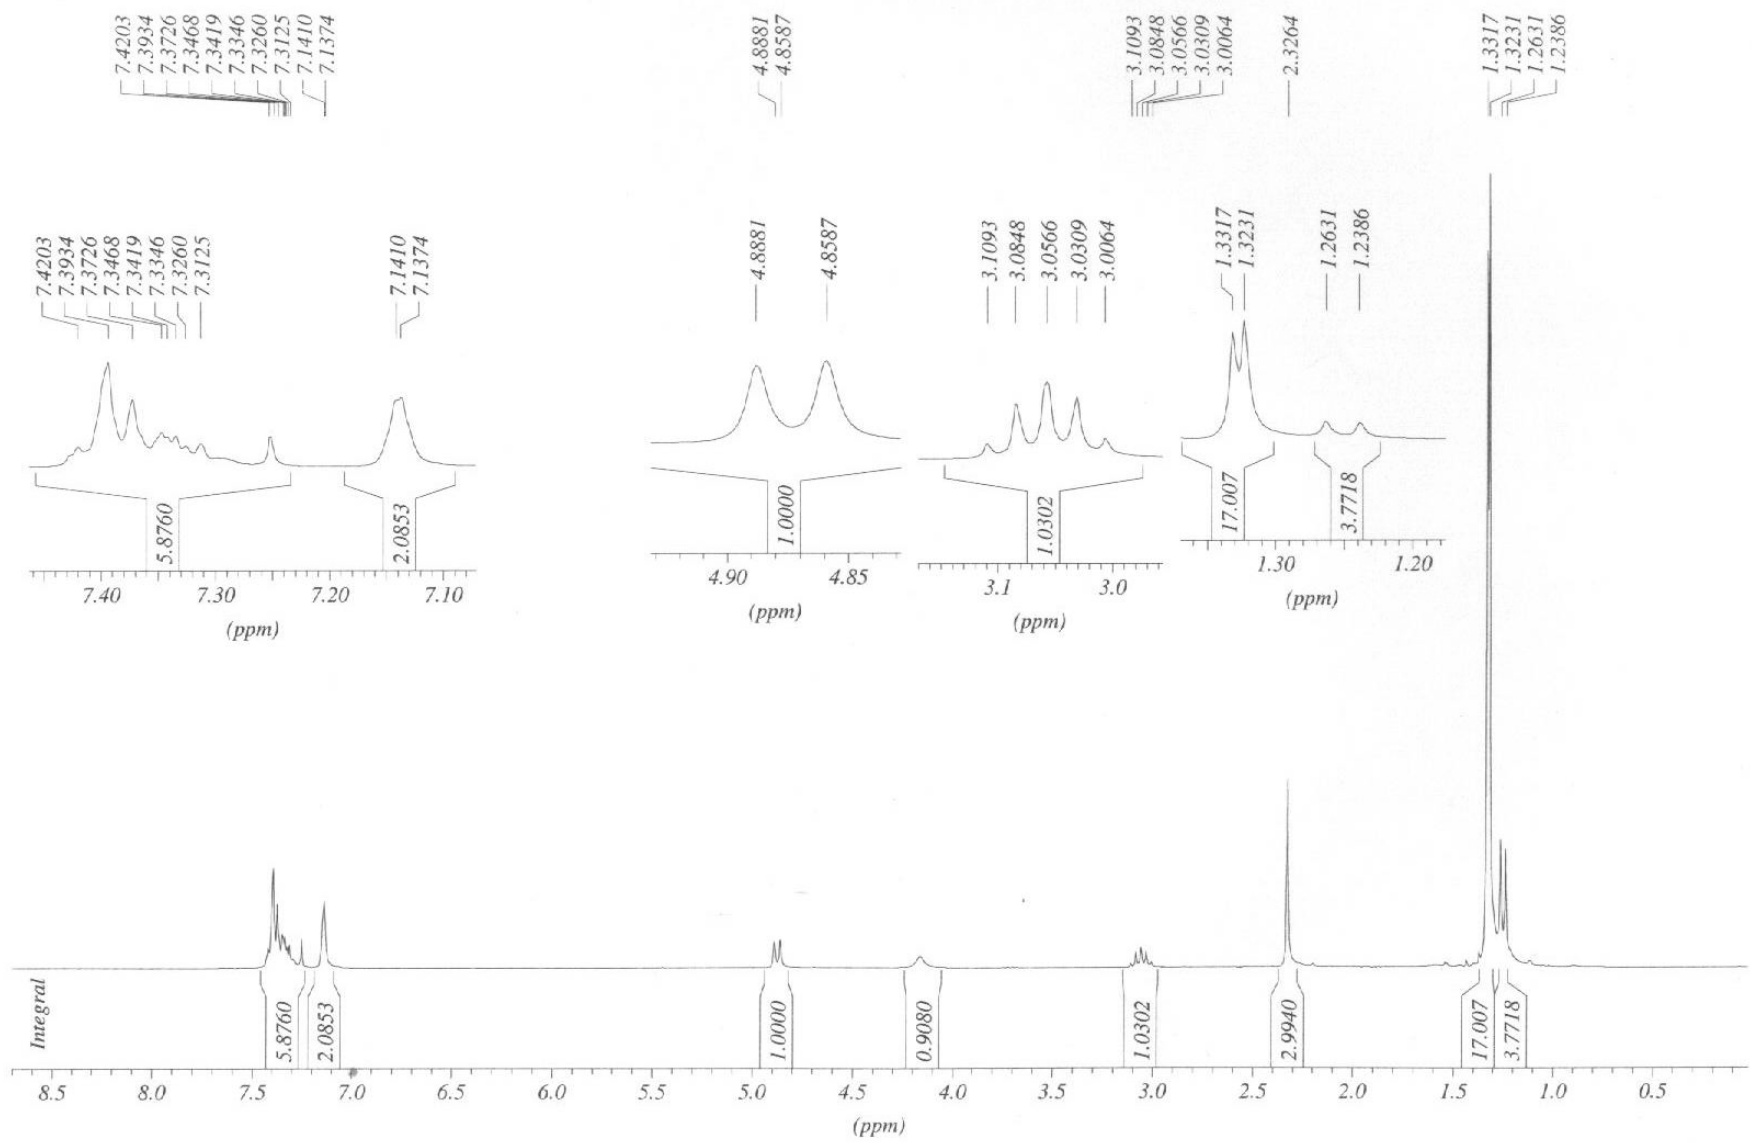

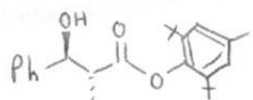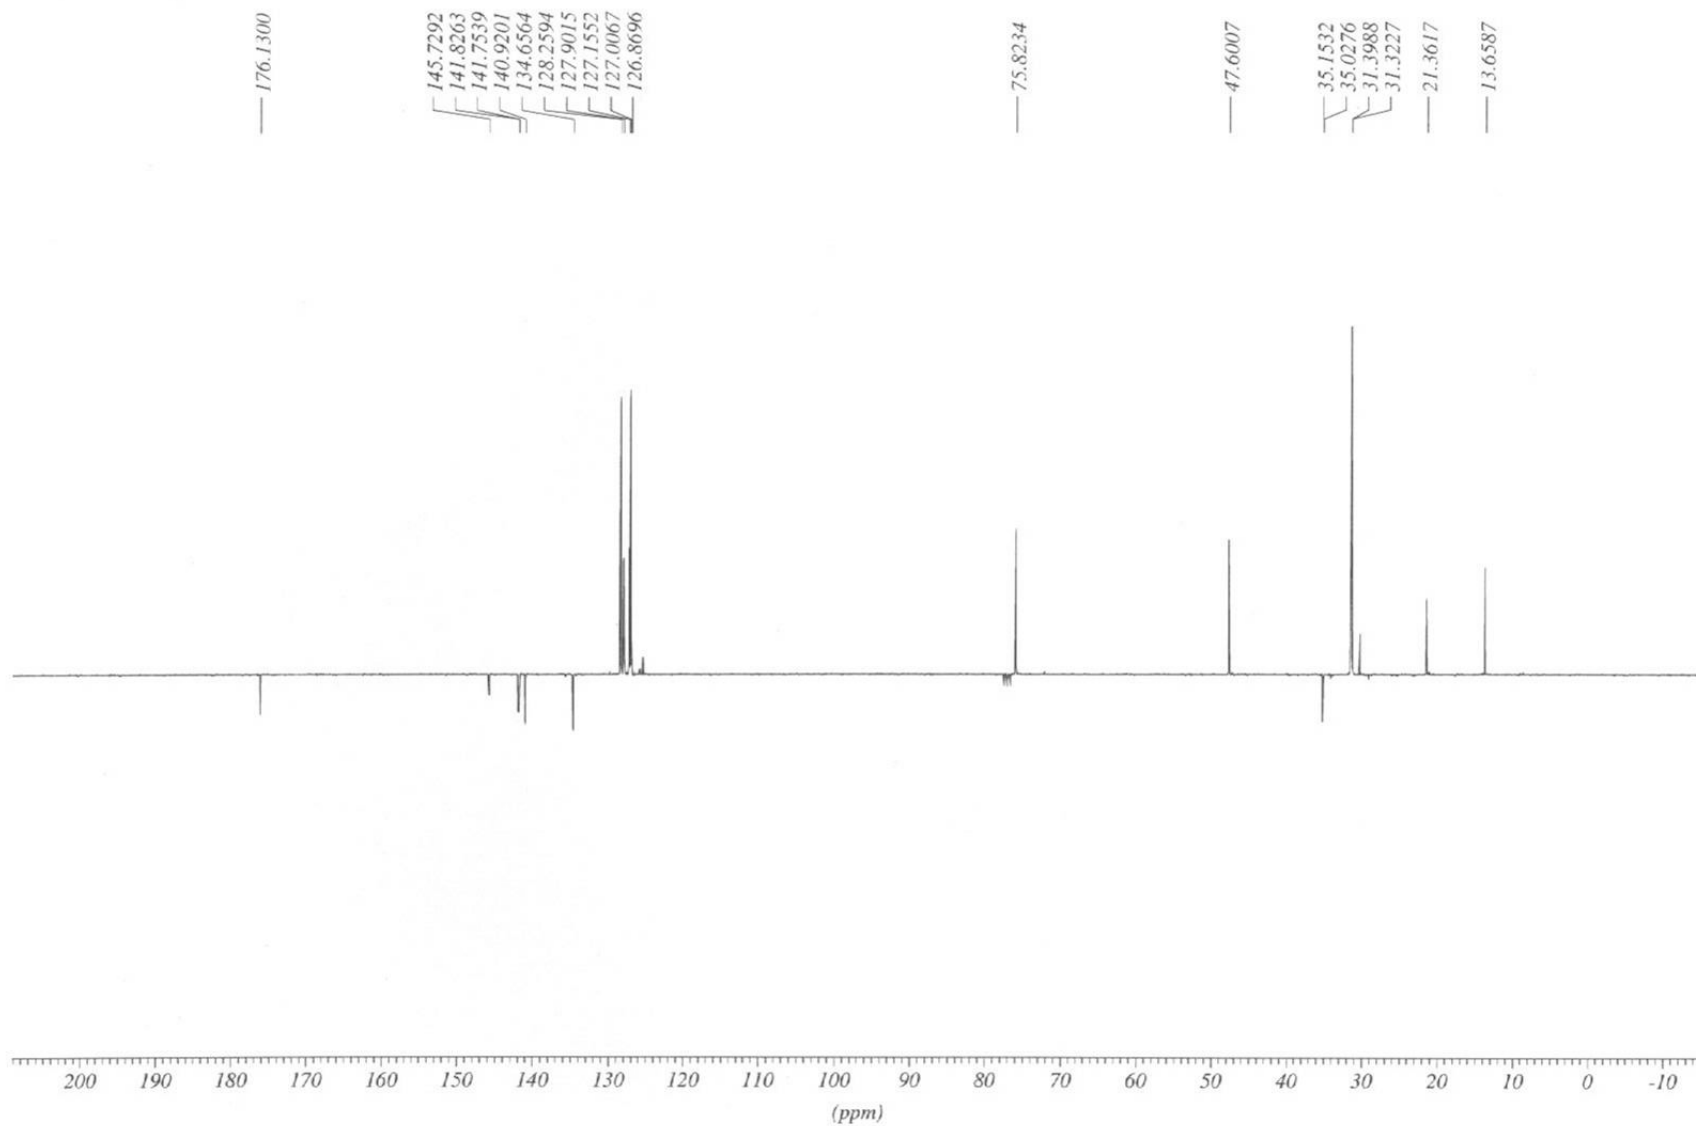

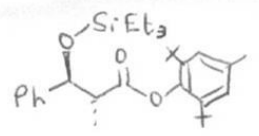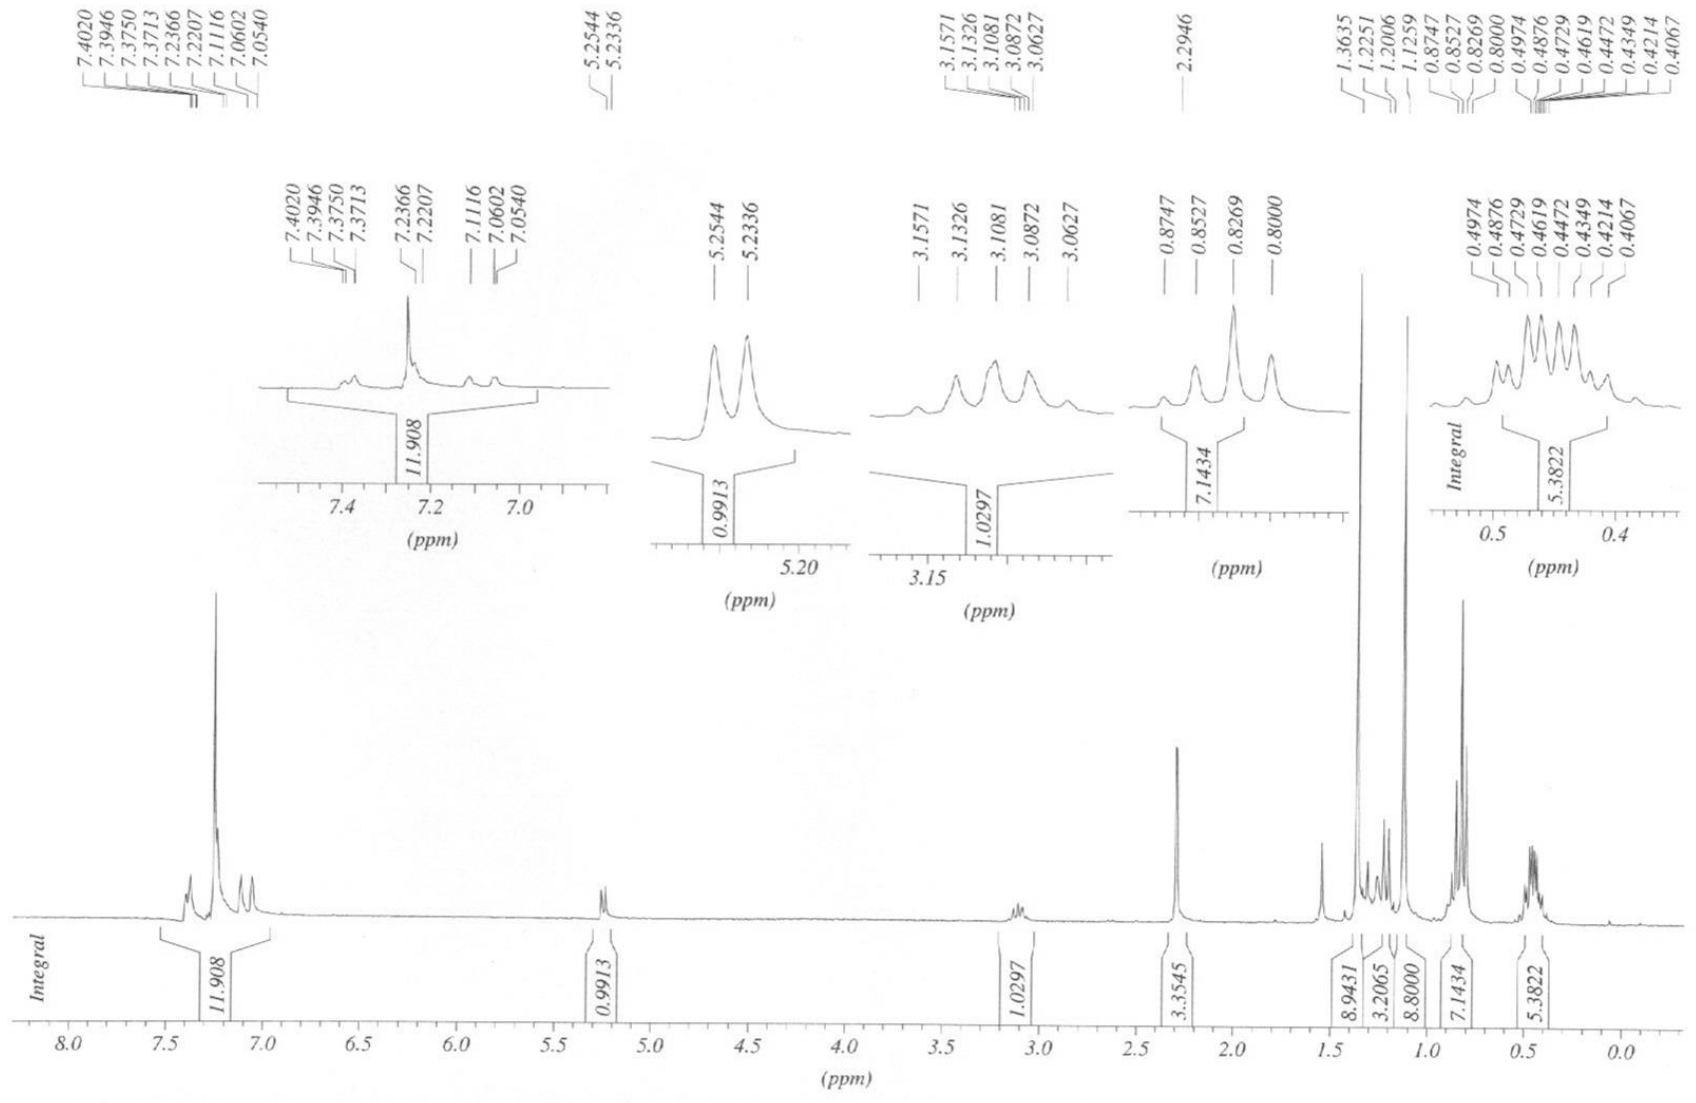

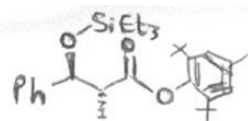

— 173.4417

146.0643  
142.1081  
142.0928  
141.8111  
134.2718  
127.7949  
127.6464  
127.4065  
127.1742  
126.8277

— 74.2699

— 49.0438

35.2256  
35.0885  
31.7035  
31.1704

— 21.4455

— 12.2232

6.7629  
4.7563

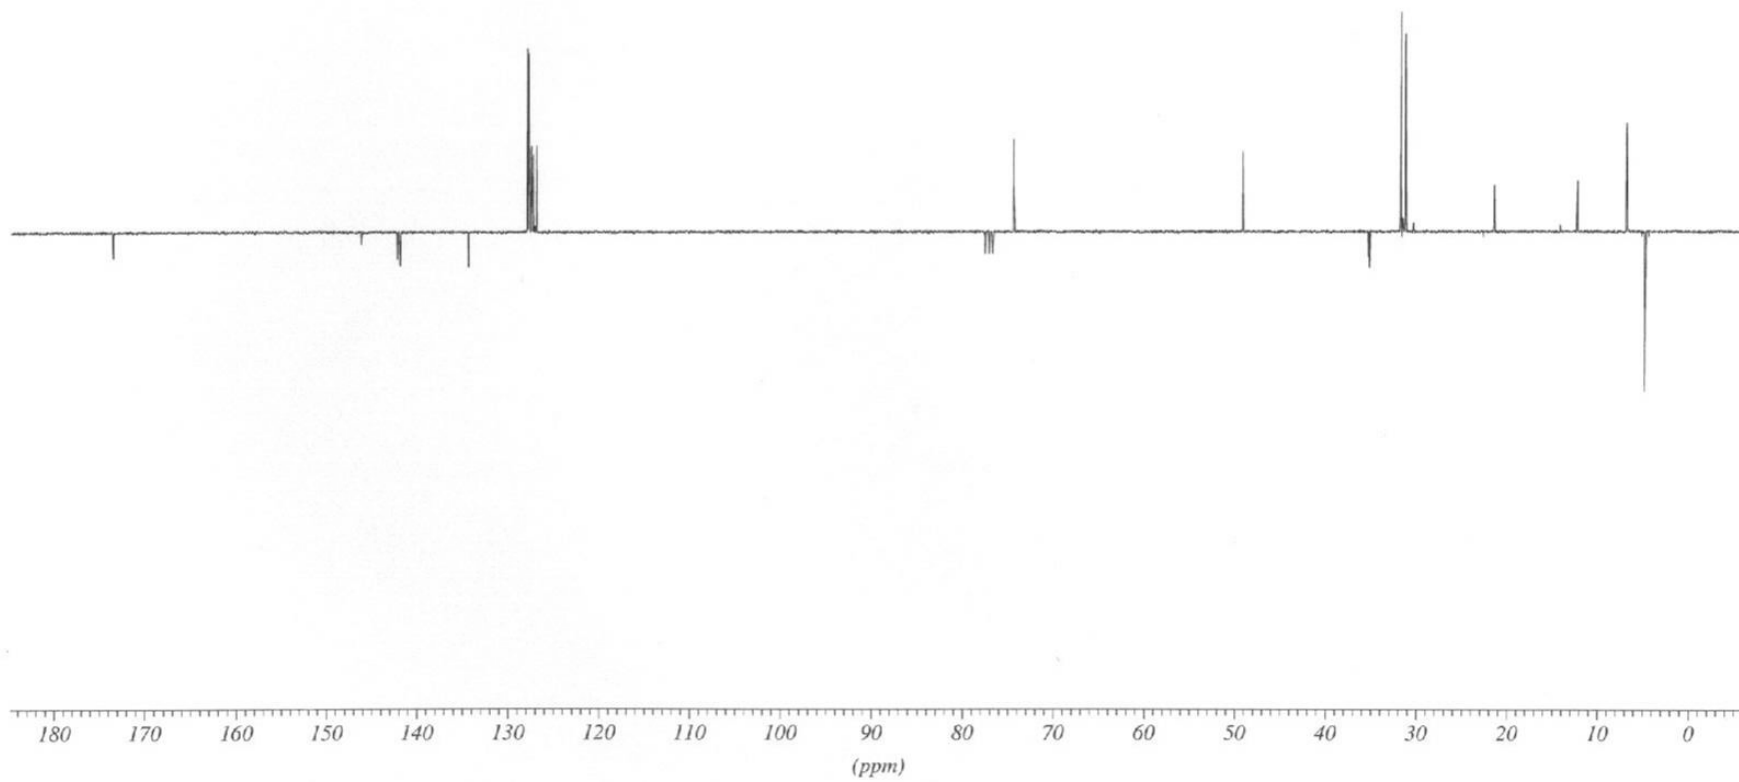

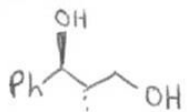

7.2635  
7.2586  
7.2525

4.5291  
4.5010

3.7279  
3.7120  
3.6863  
3.6508

3.2587  
3.1681

2.0961  
2.0827  
2.0729  
2.0594  
2.0484  
2.0361  
2.0263  
2.0214  
2.0092  
1.9969  
1.9846  
1.9736  
1.9614

0.6885  
0.6652

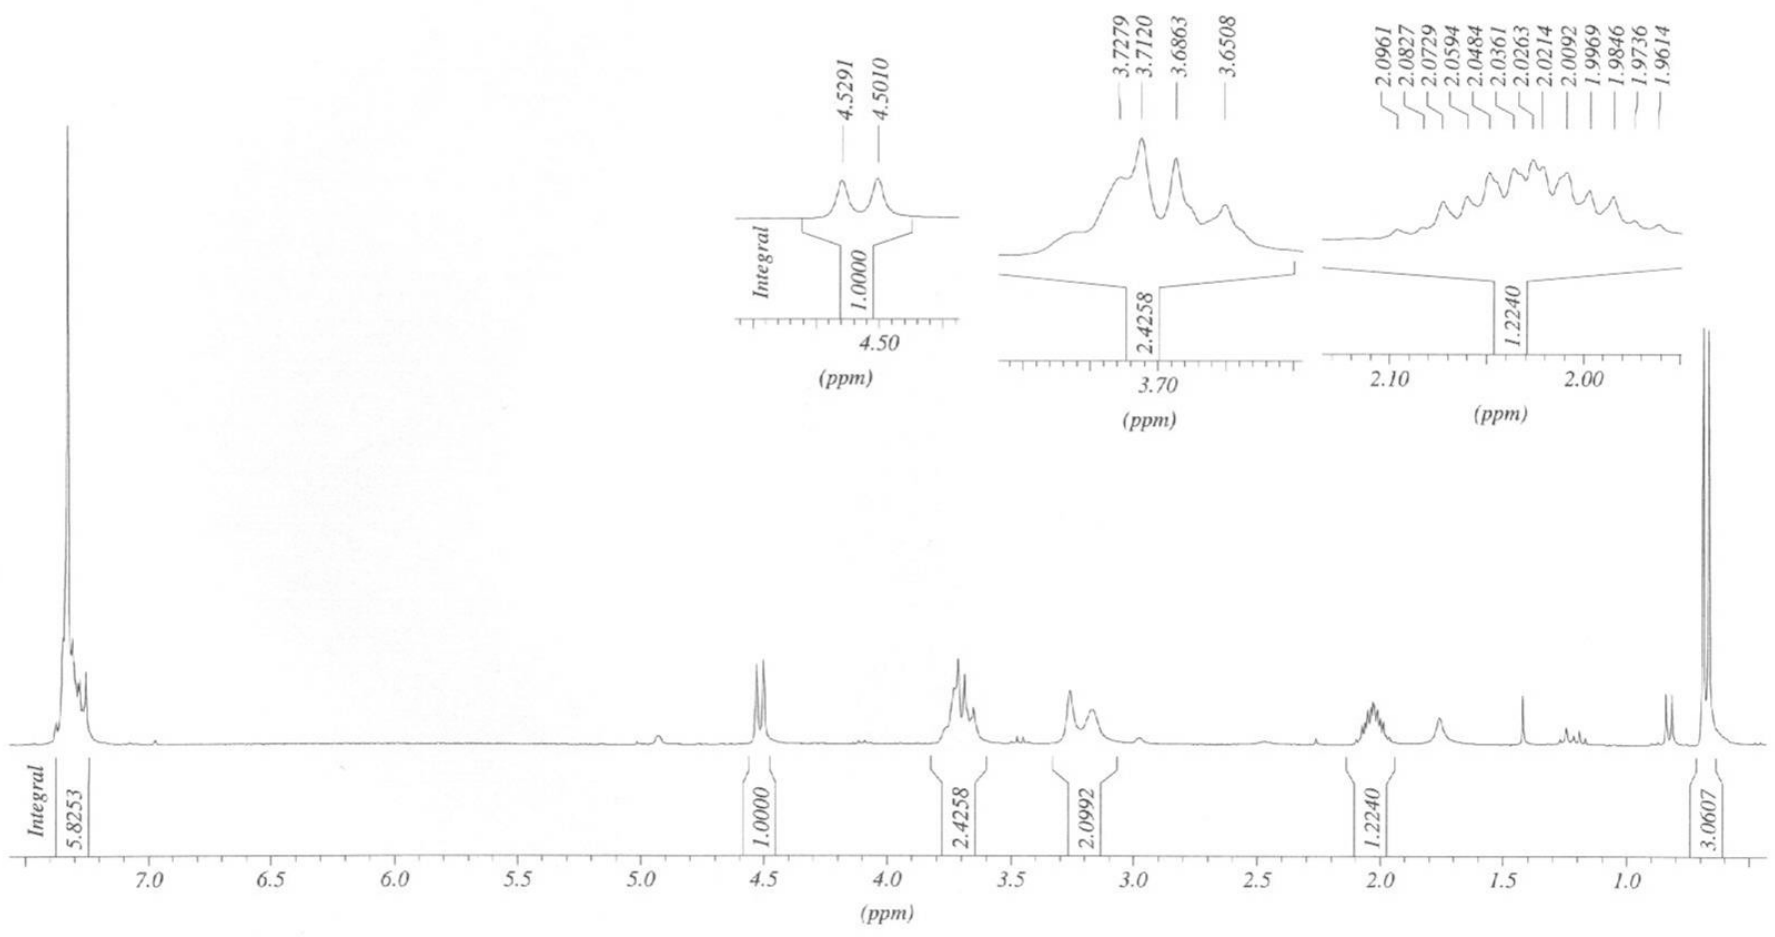

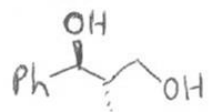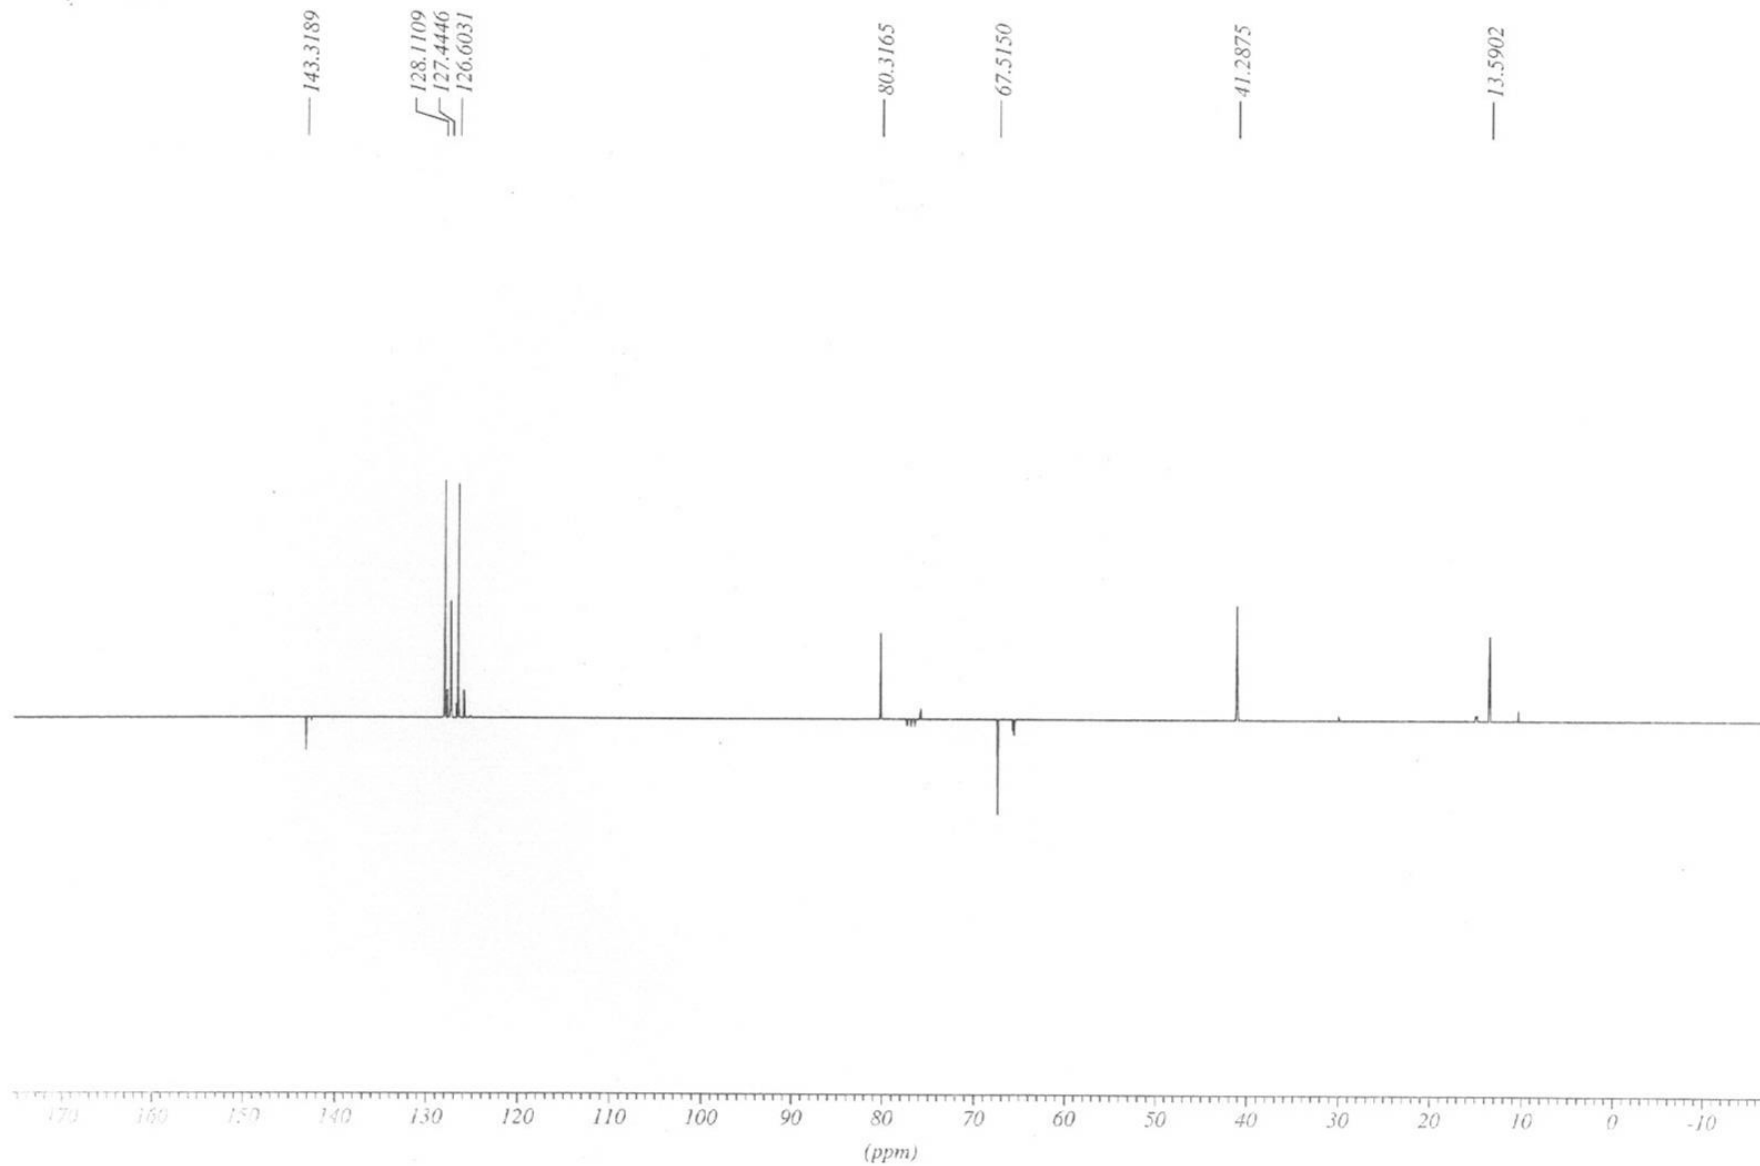

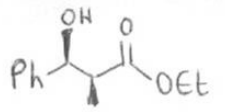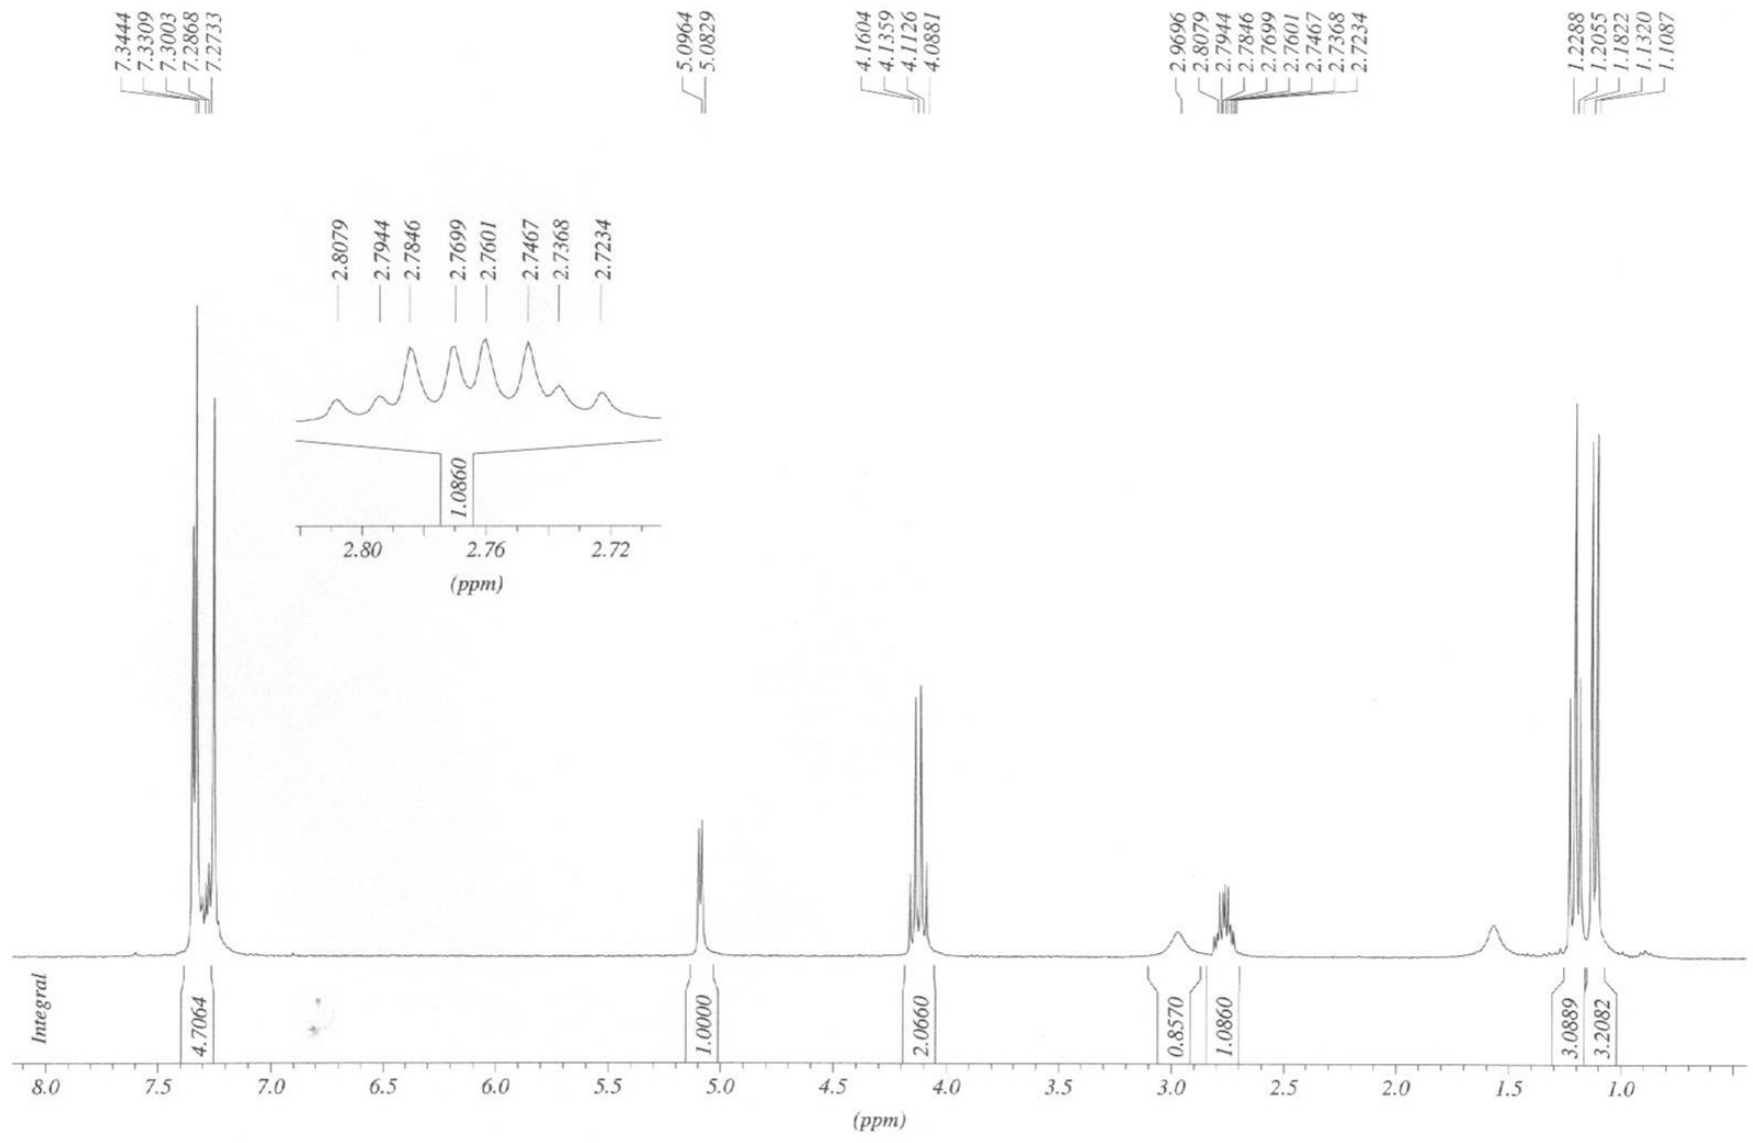



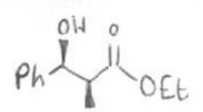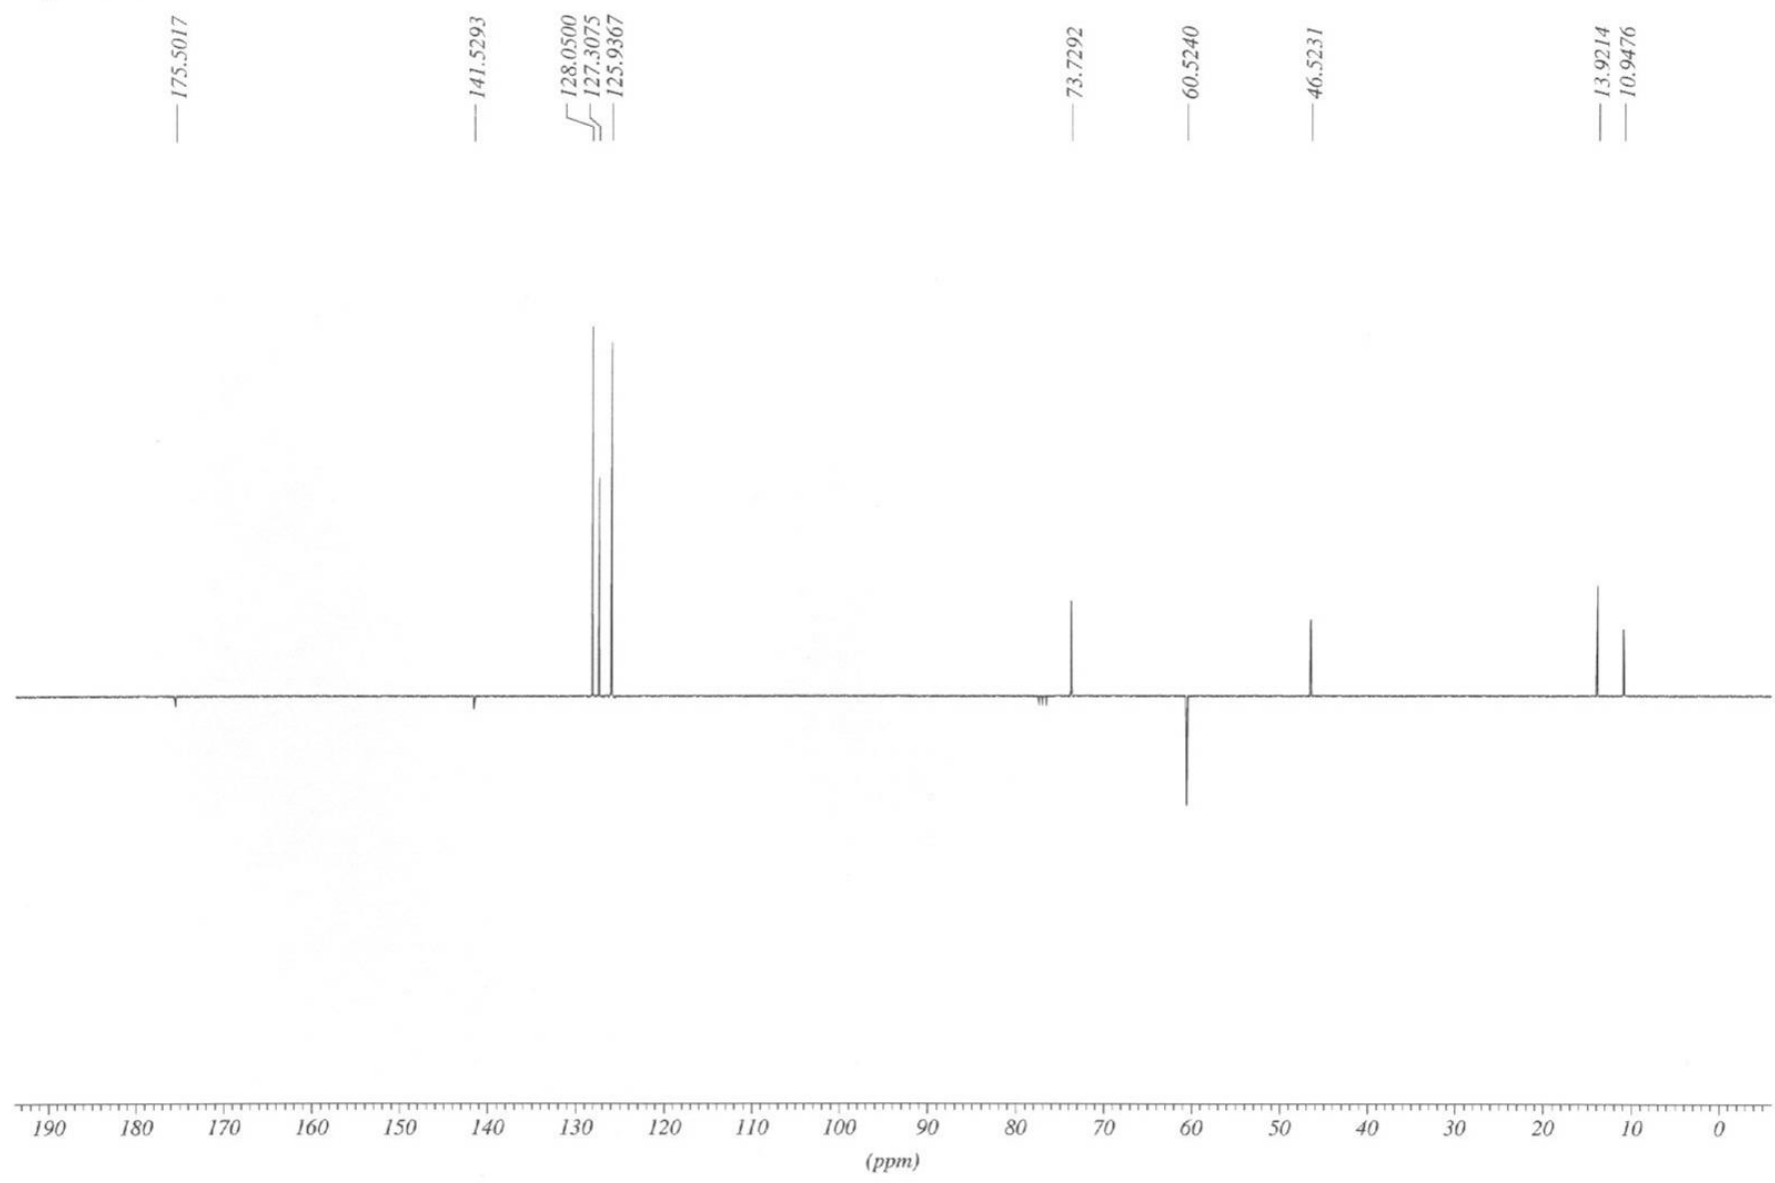

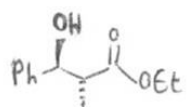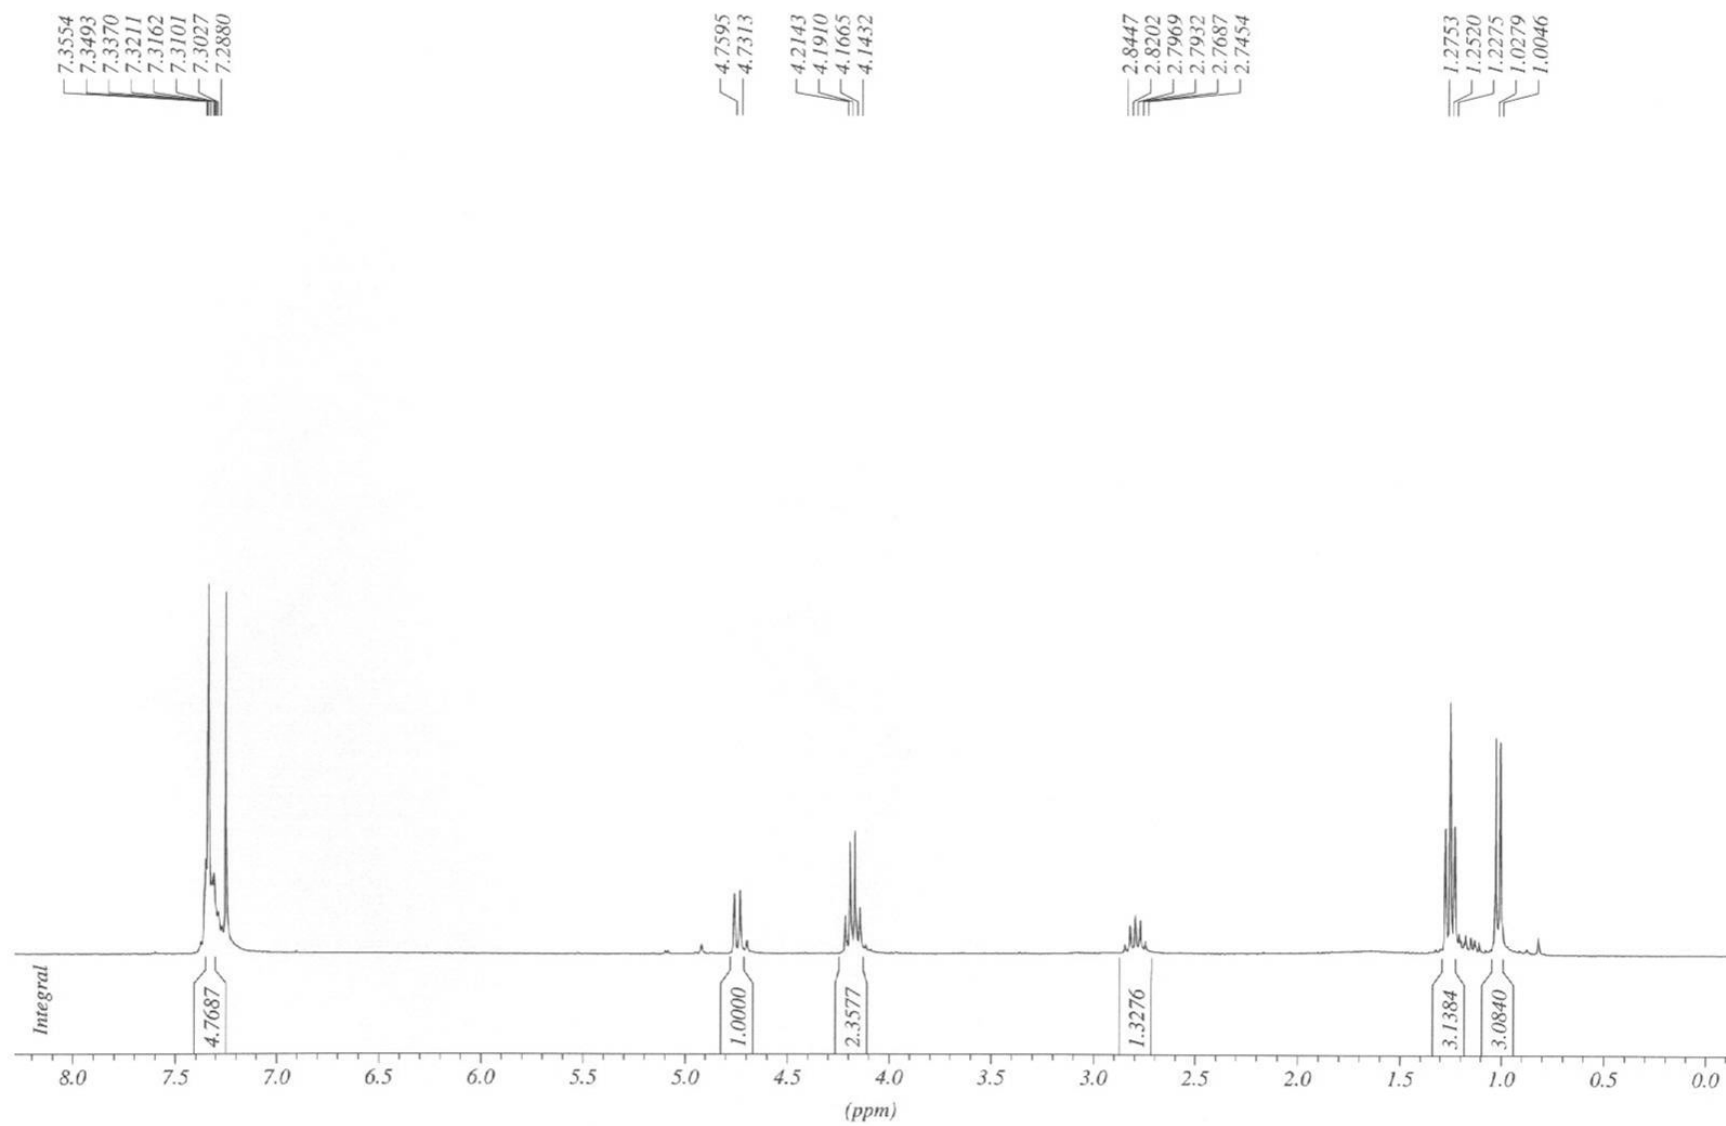

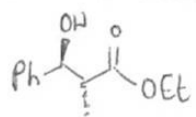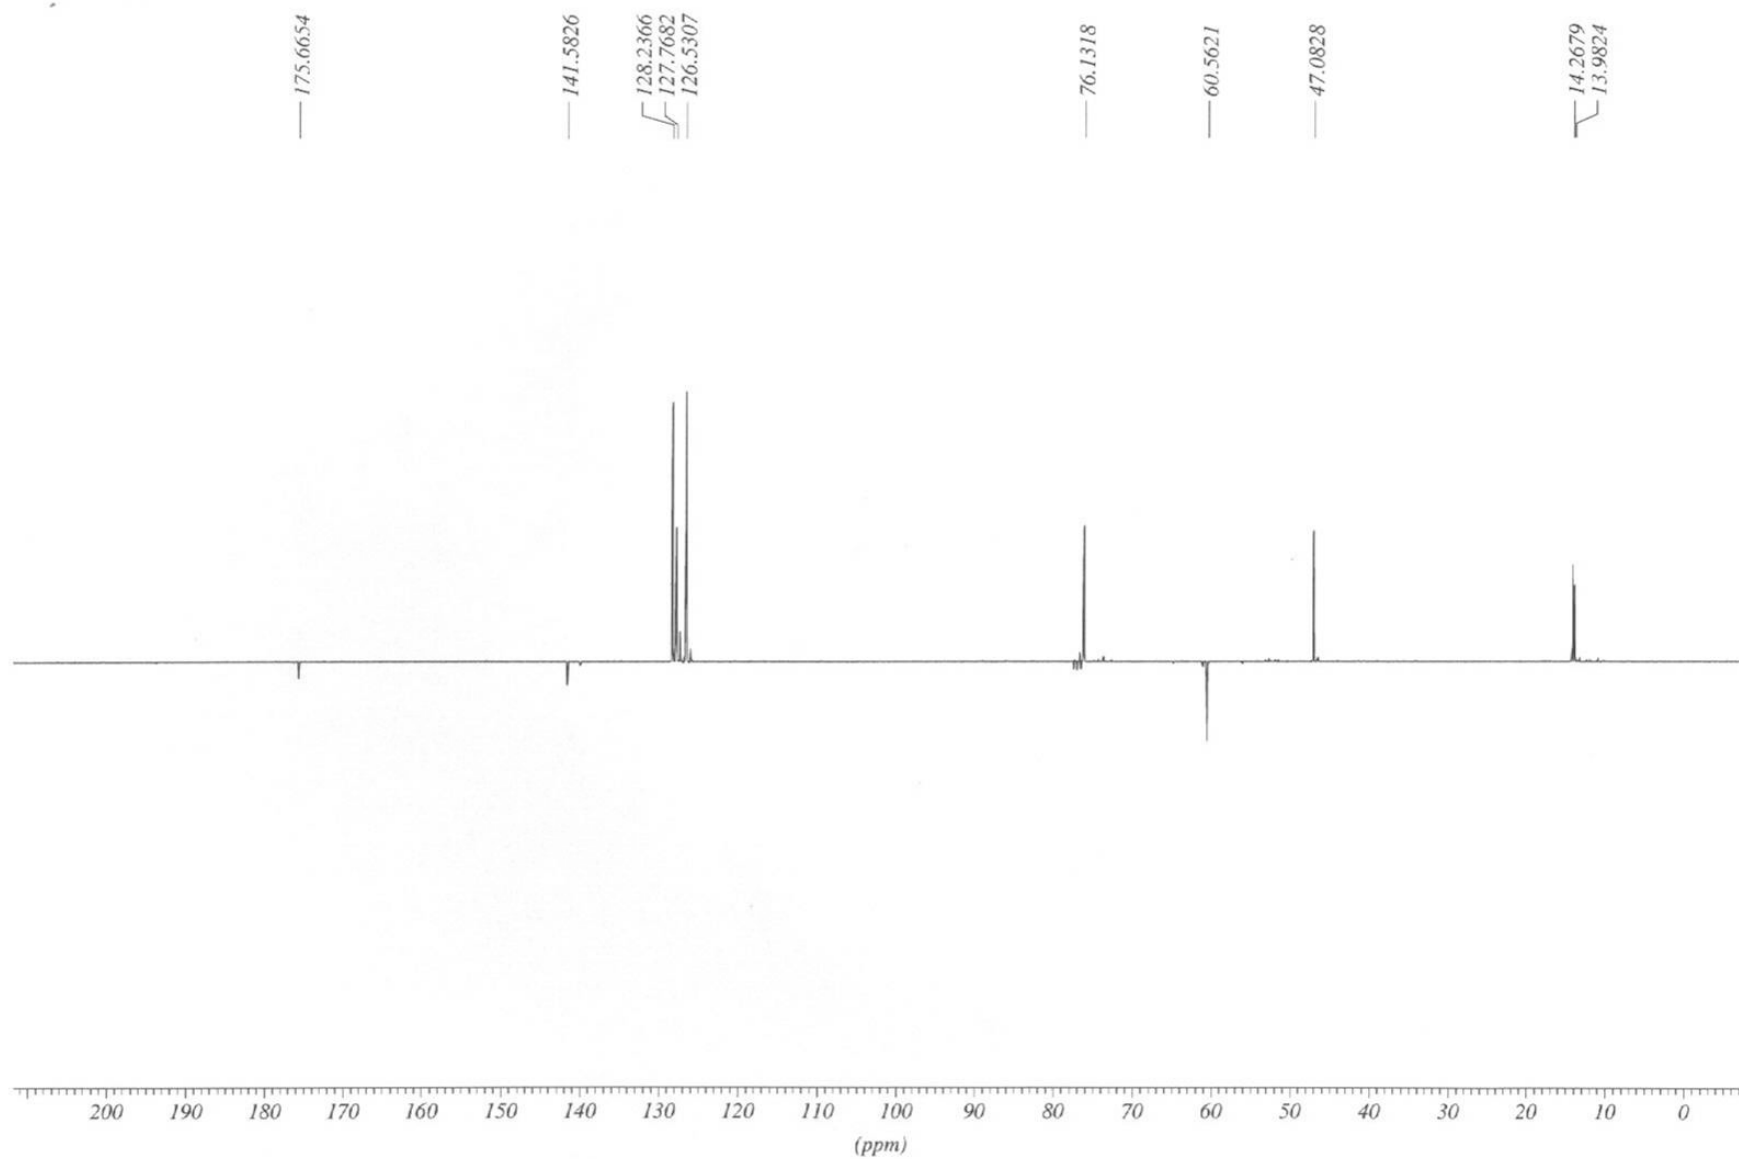

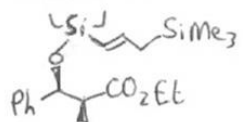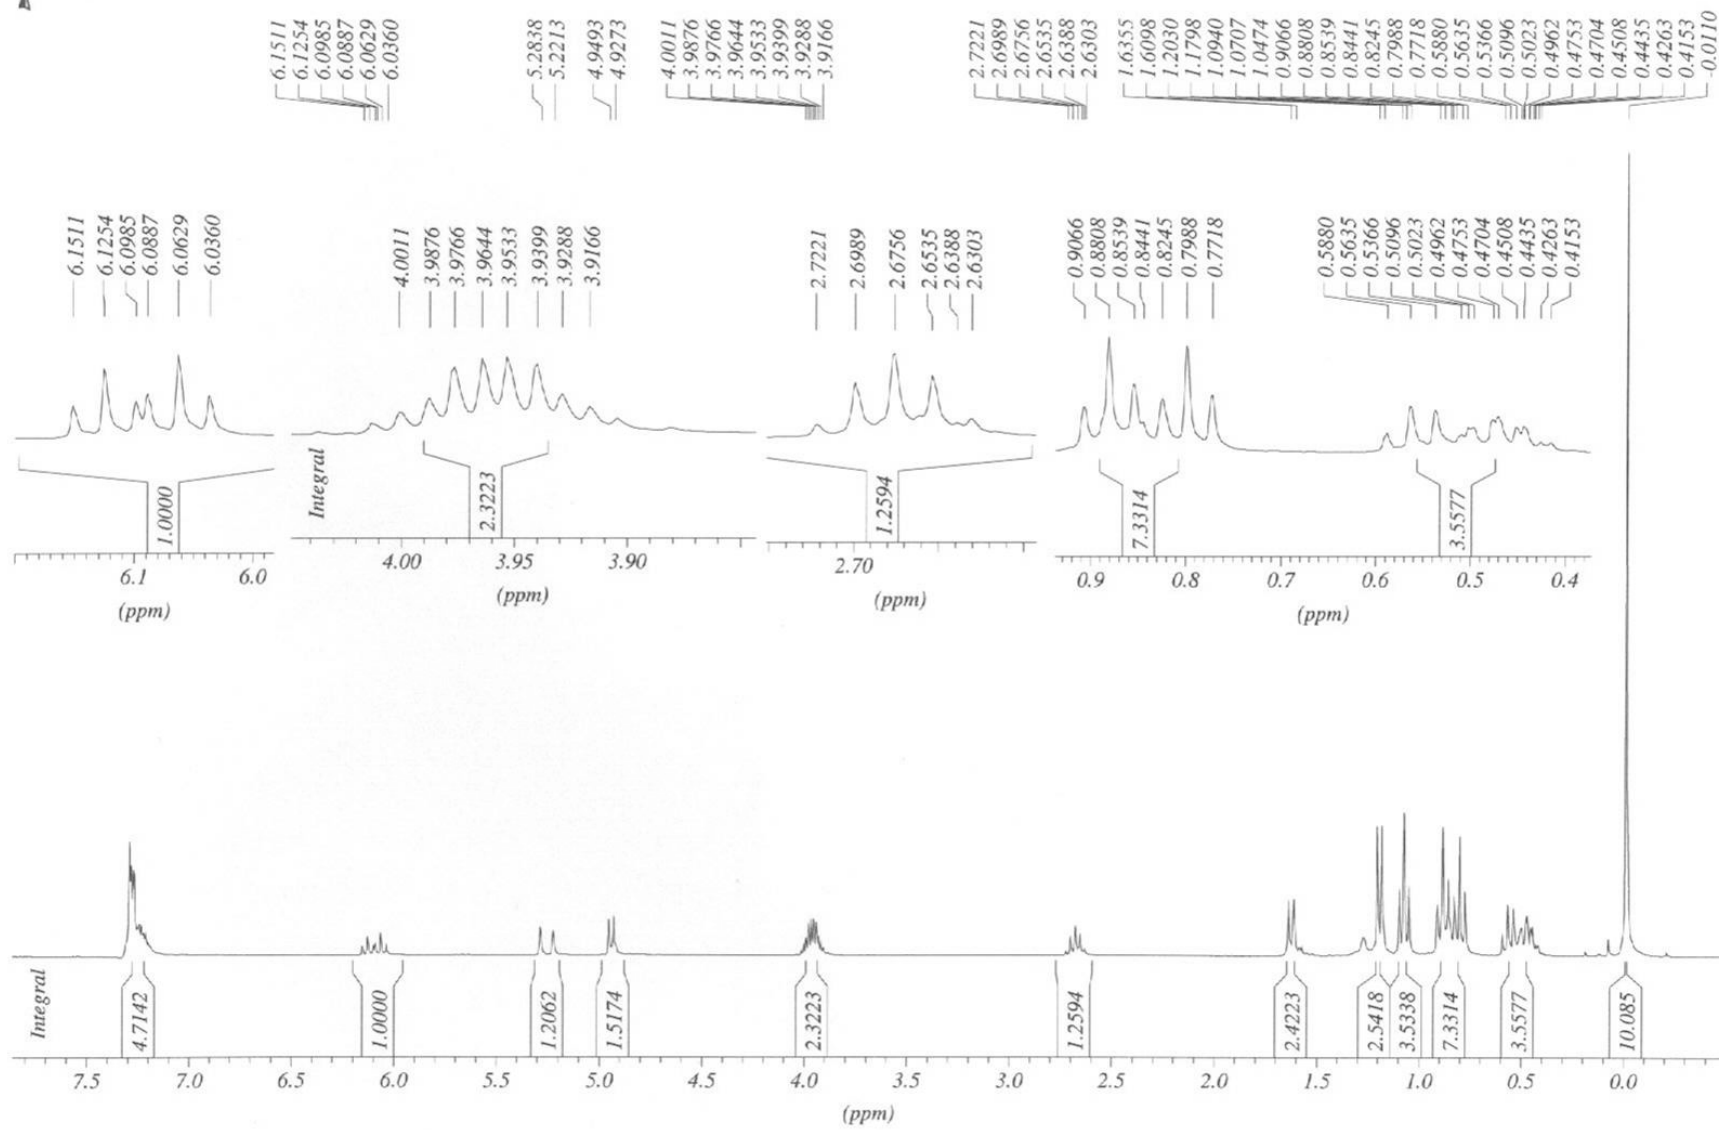

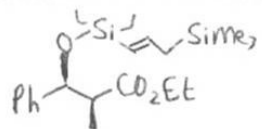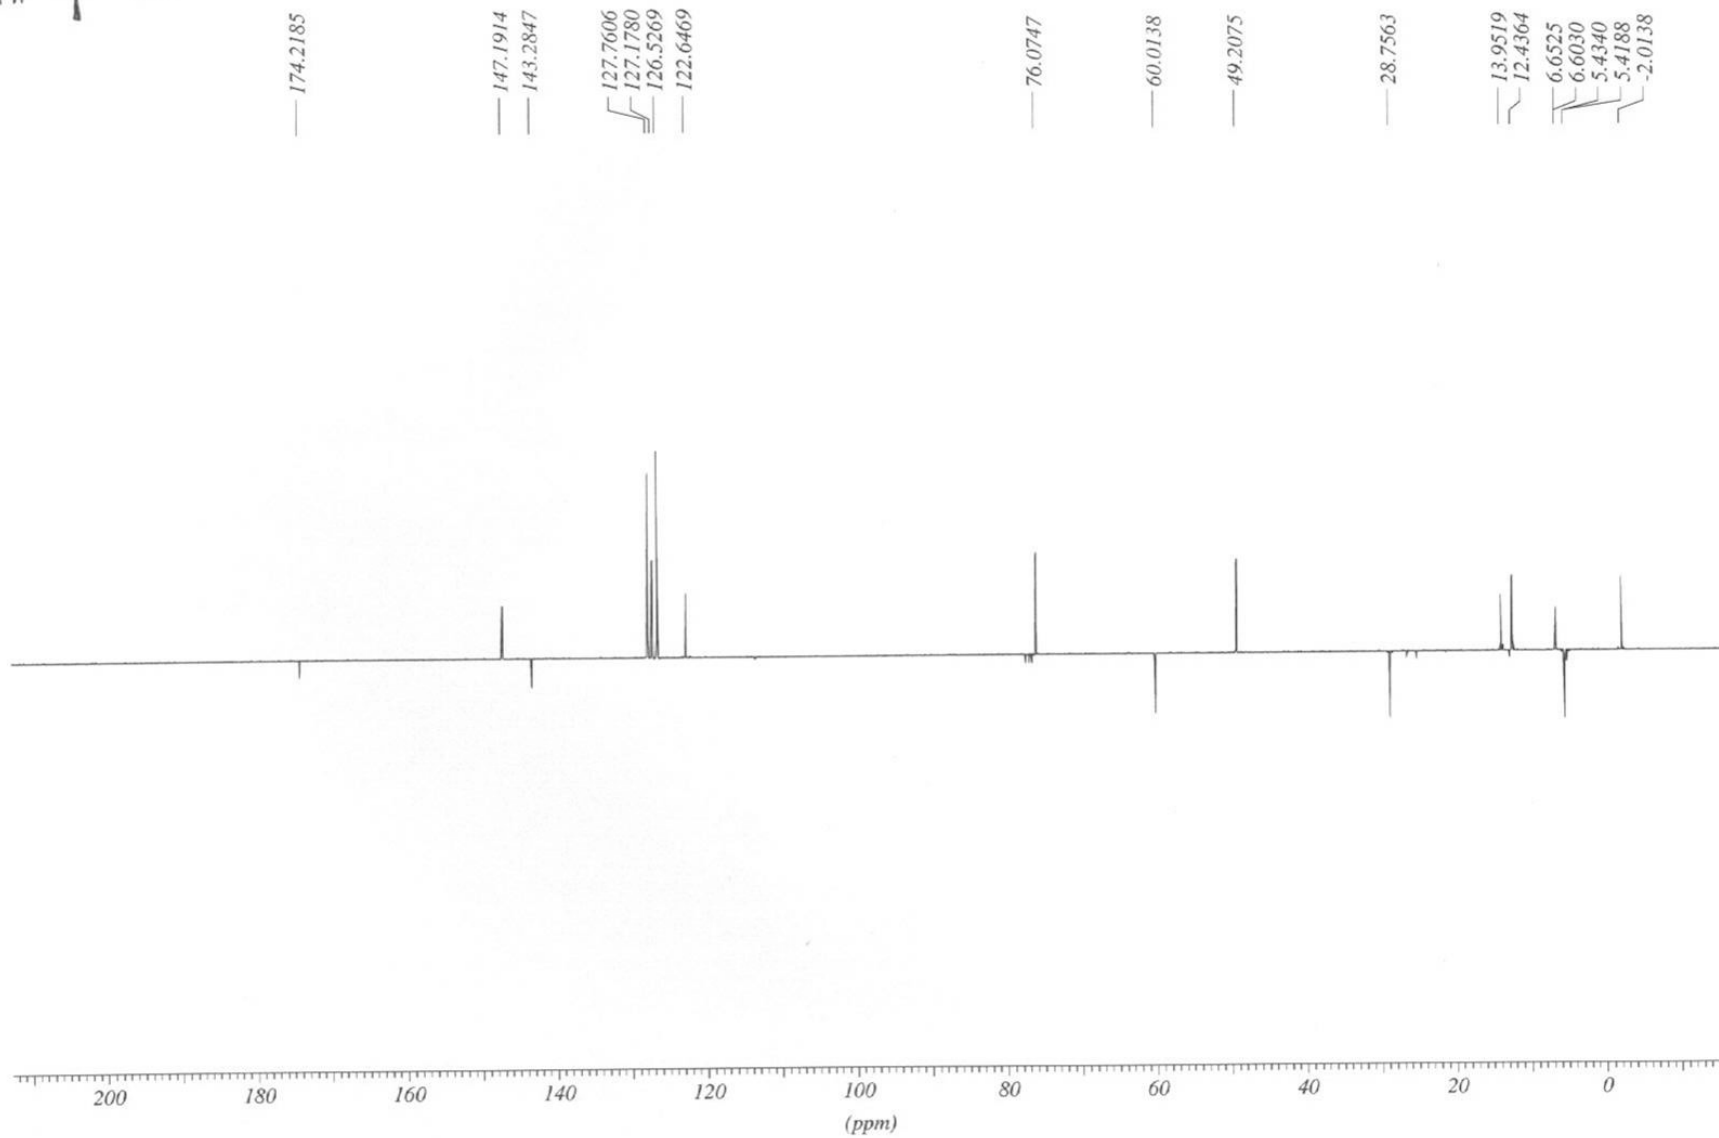

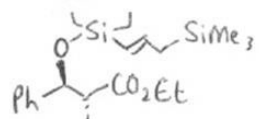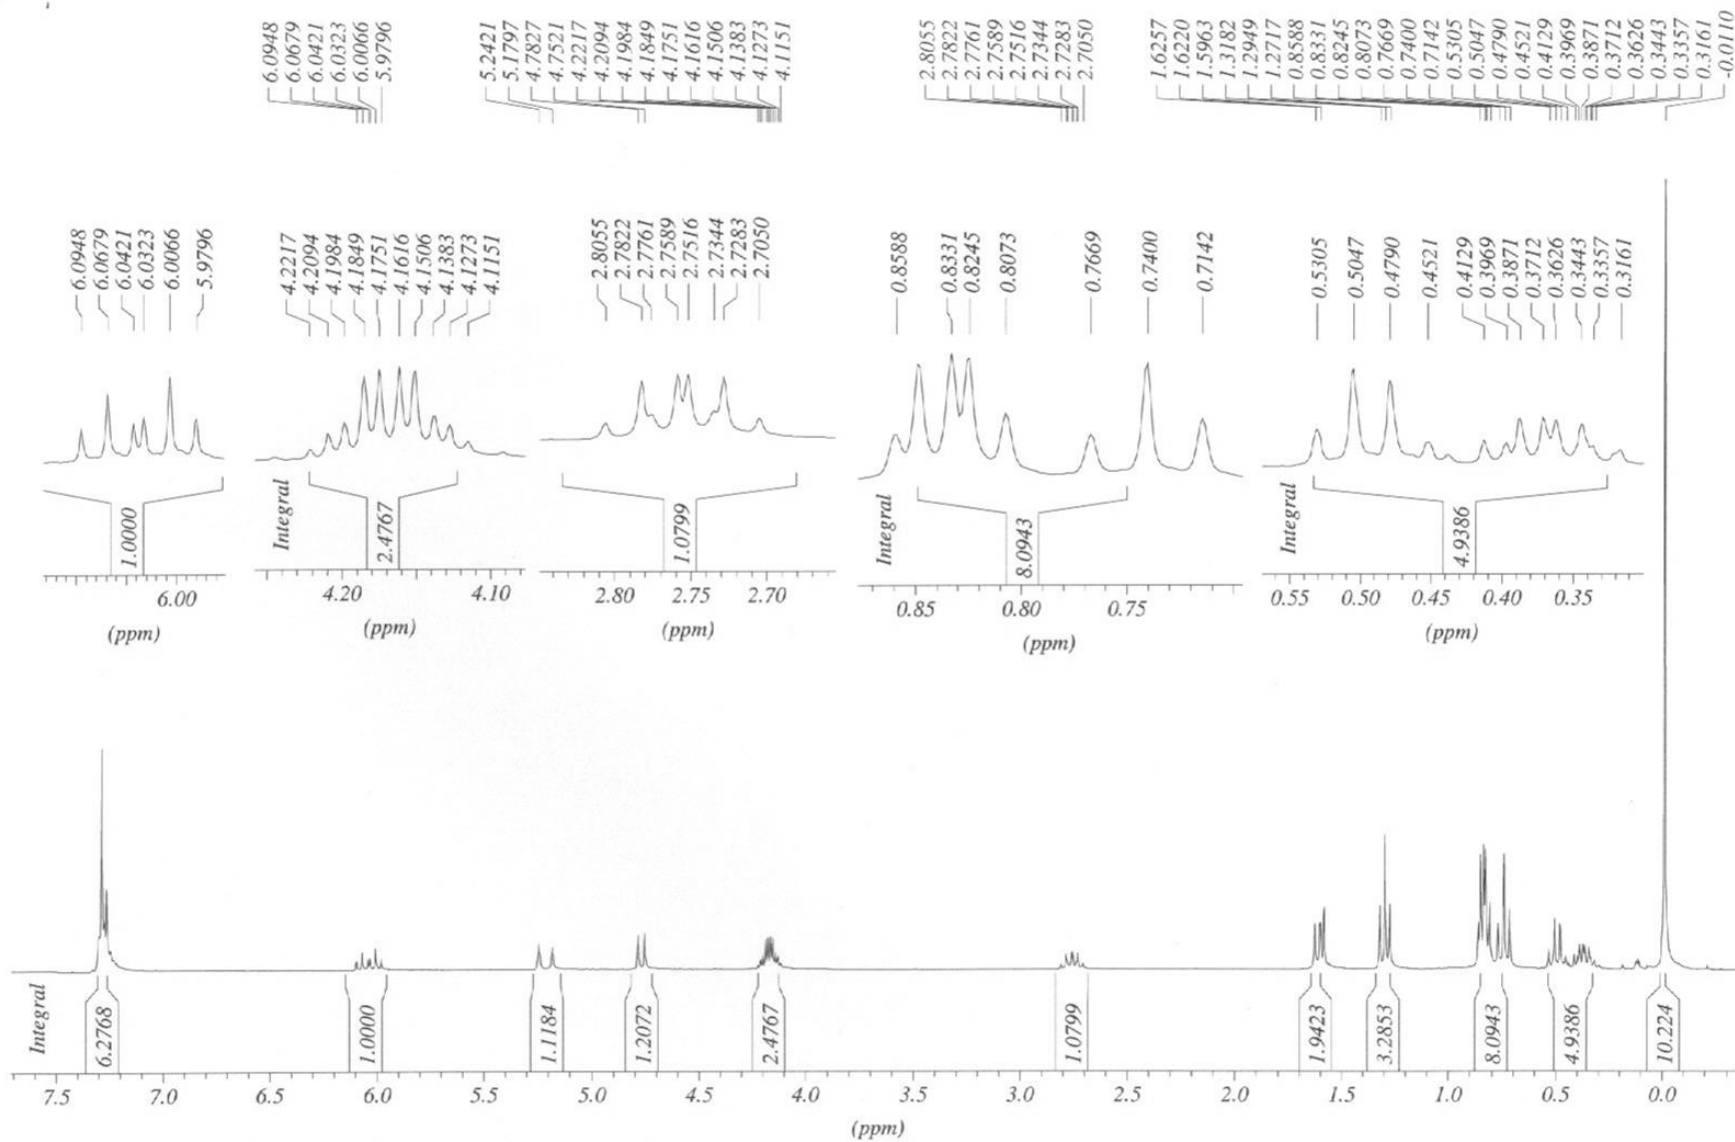

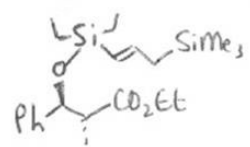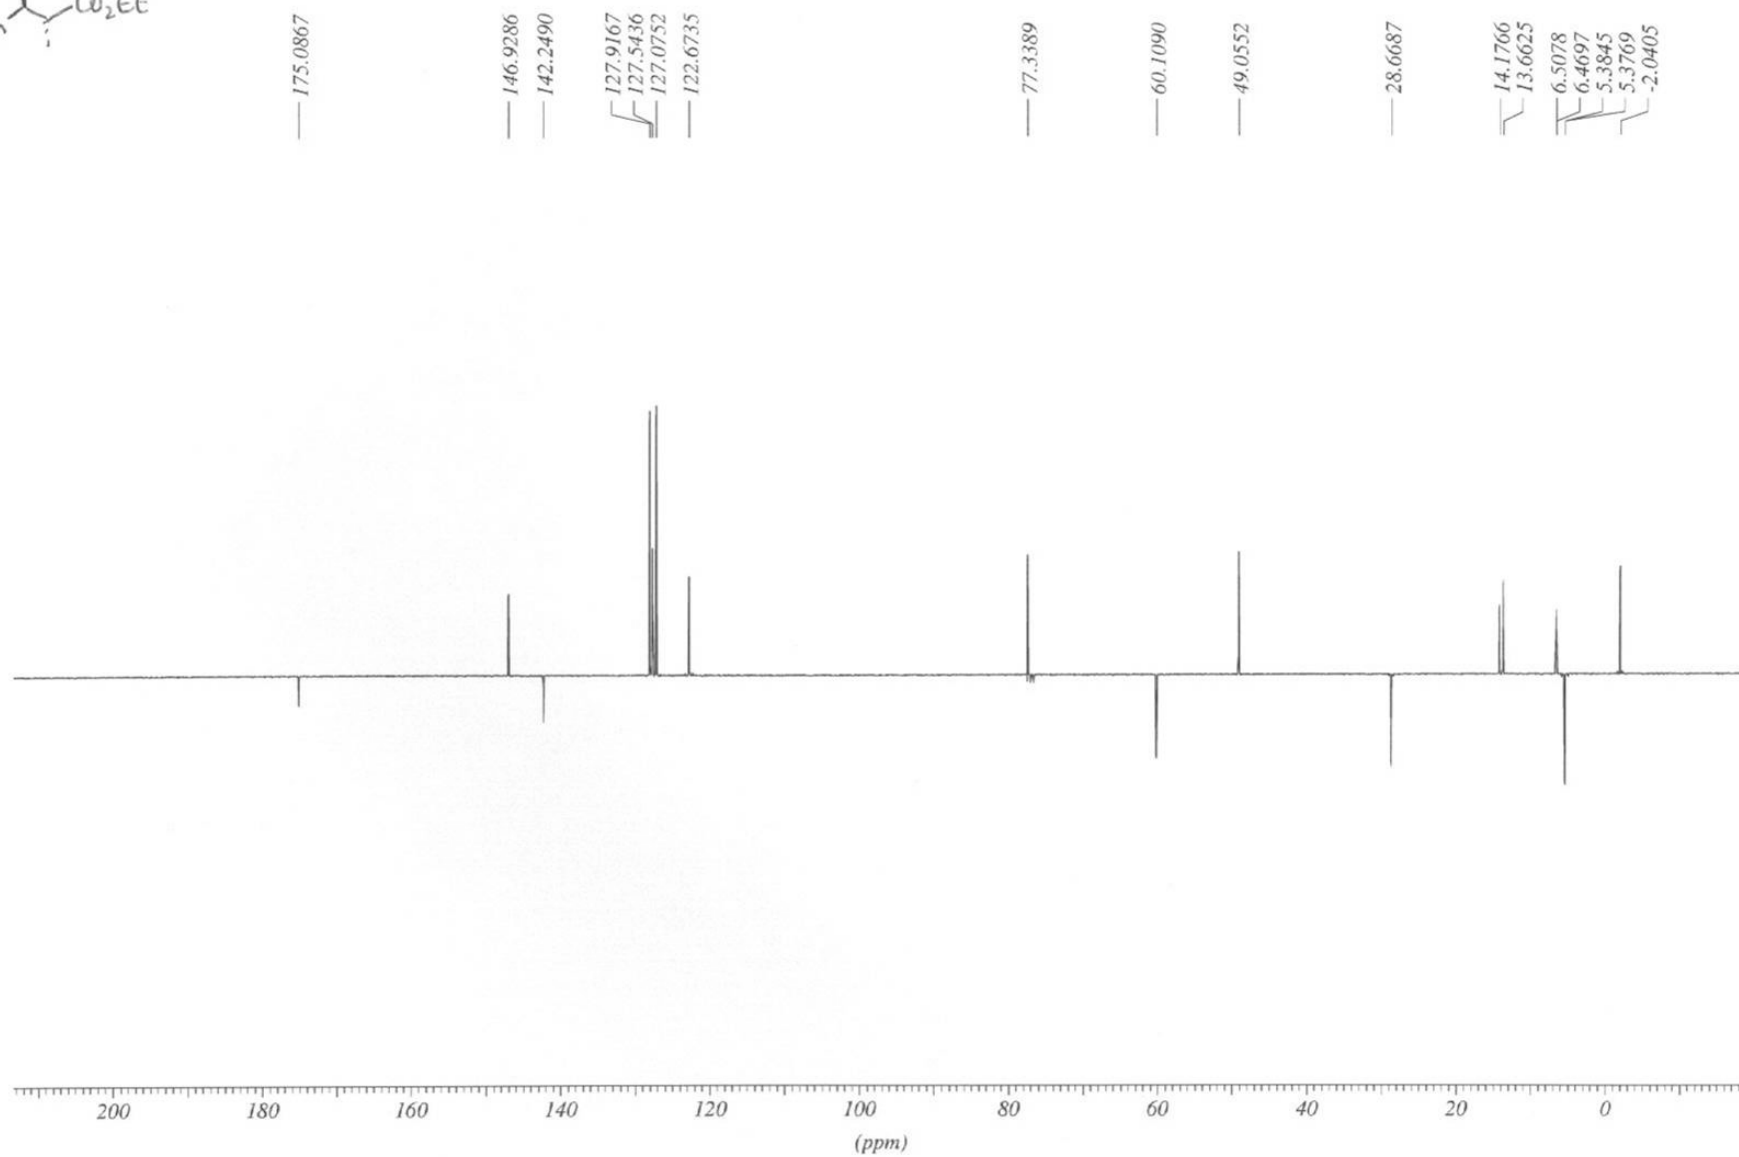

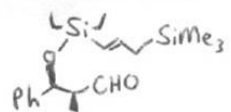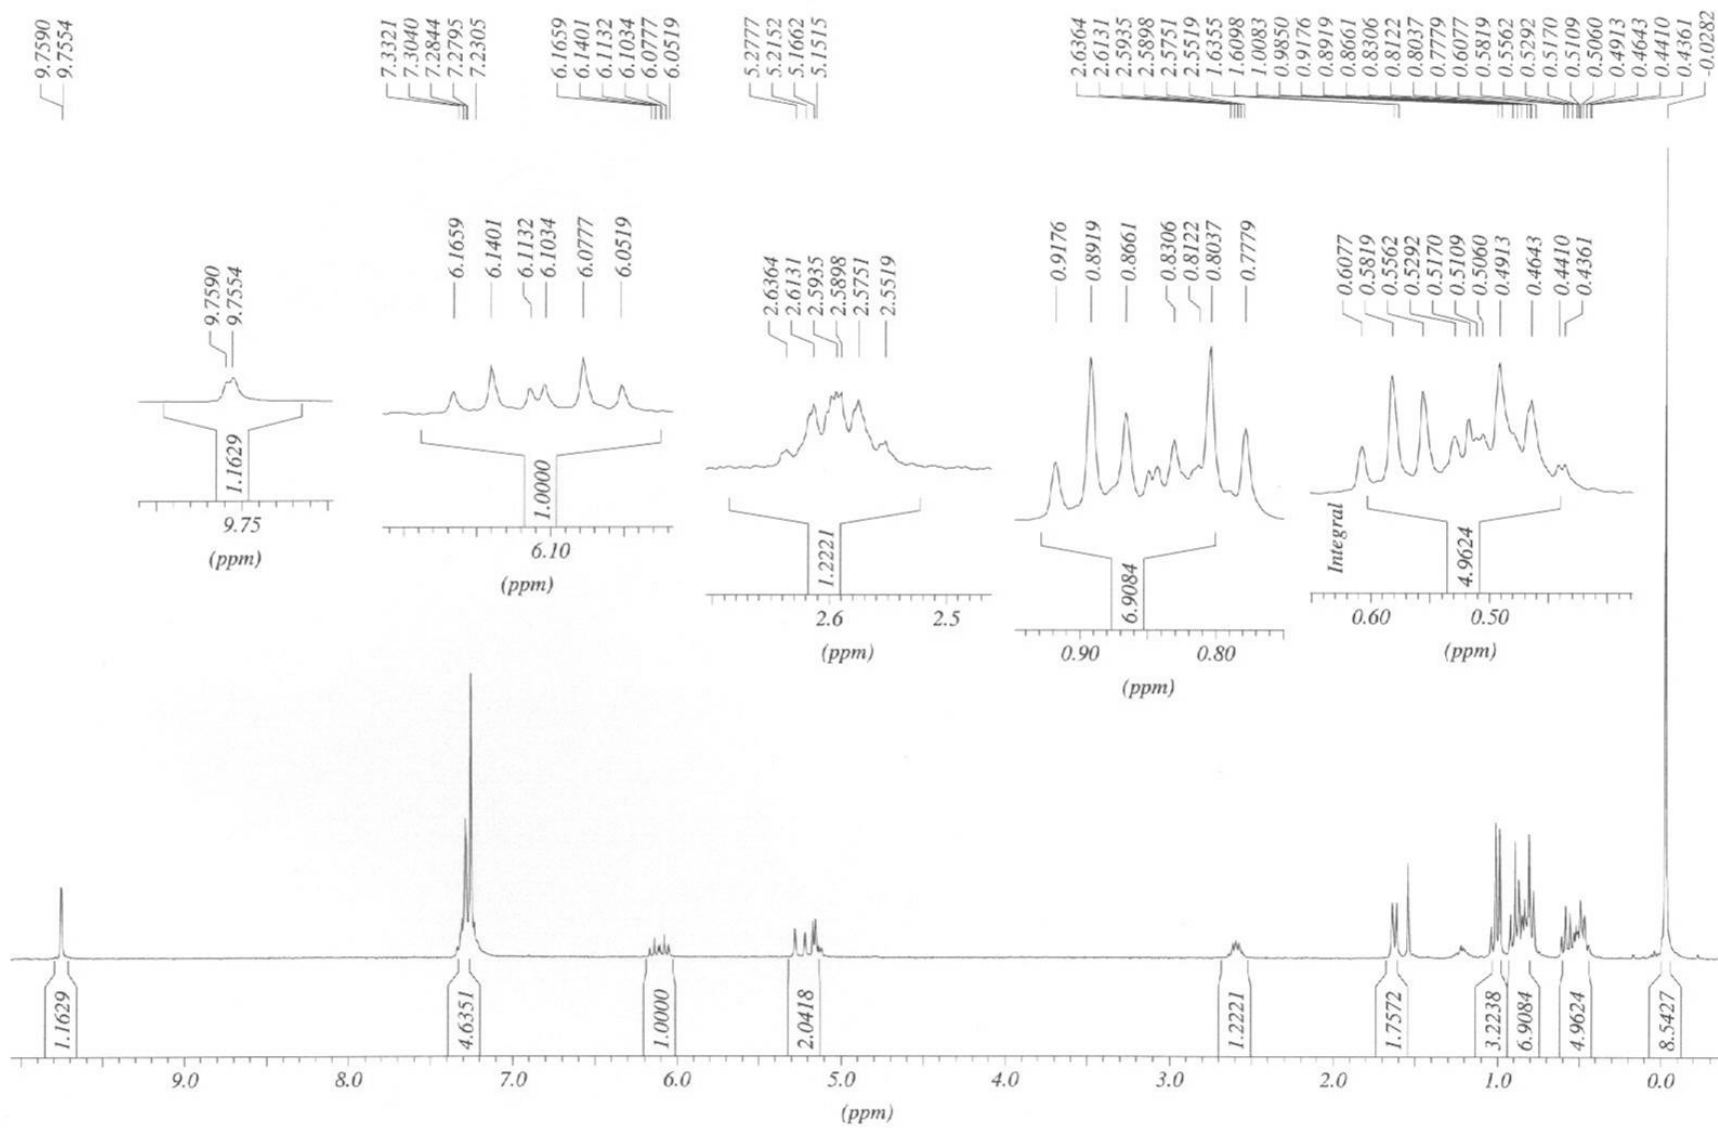



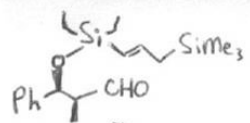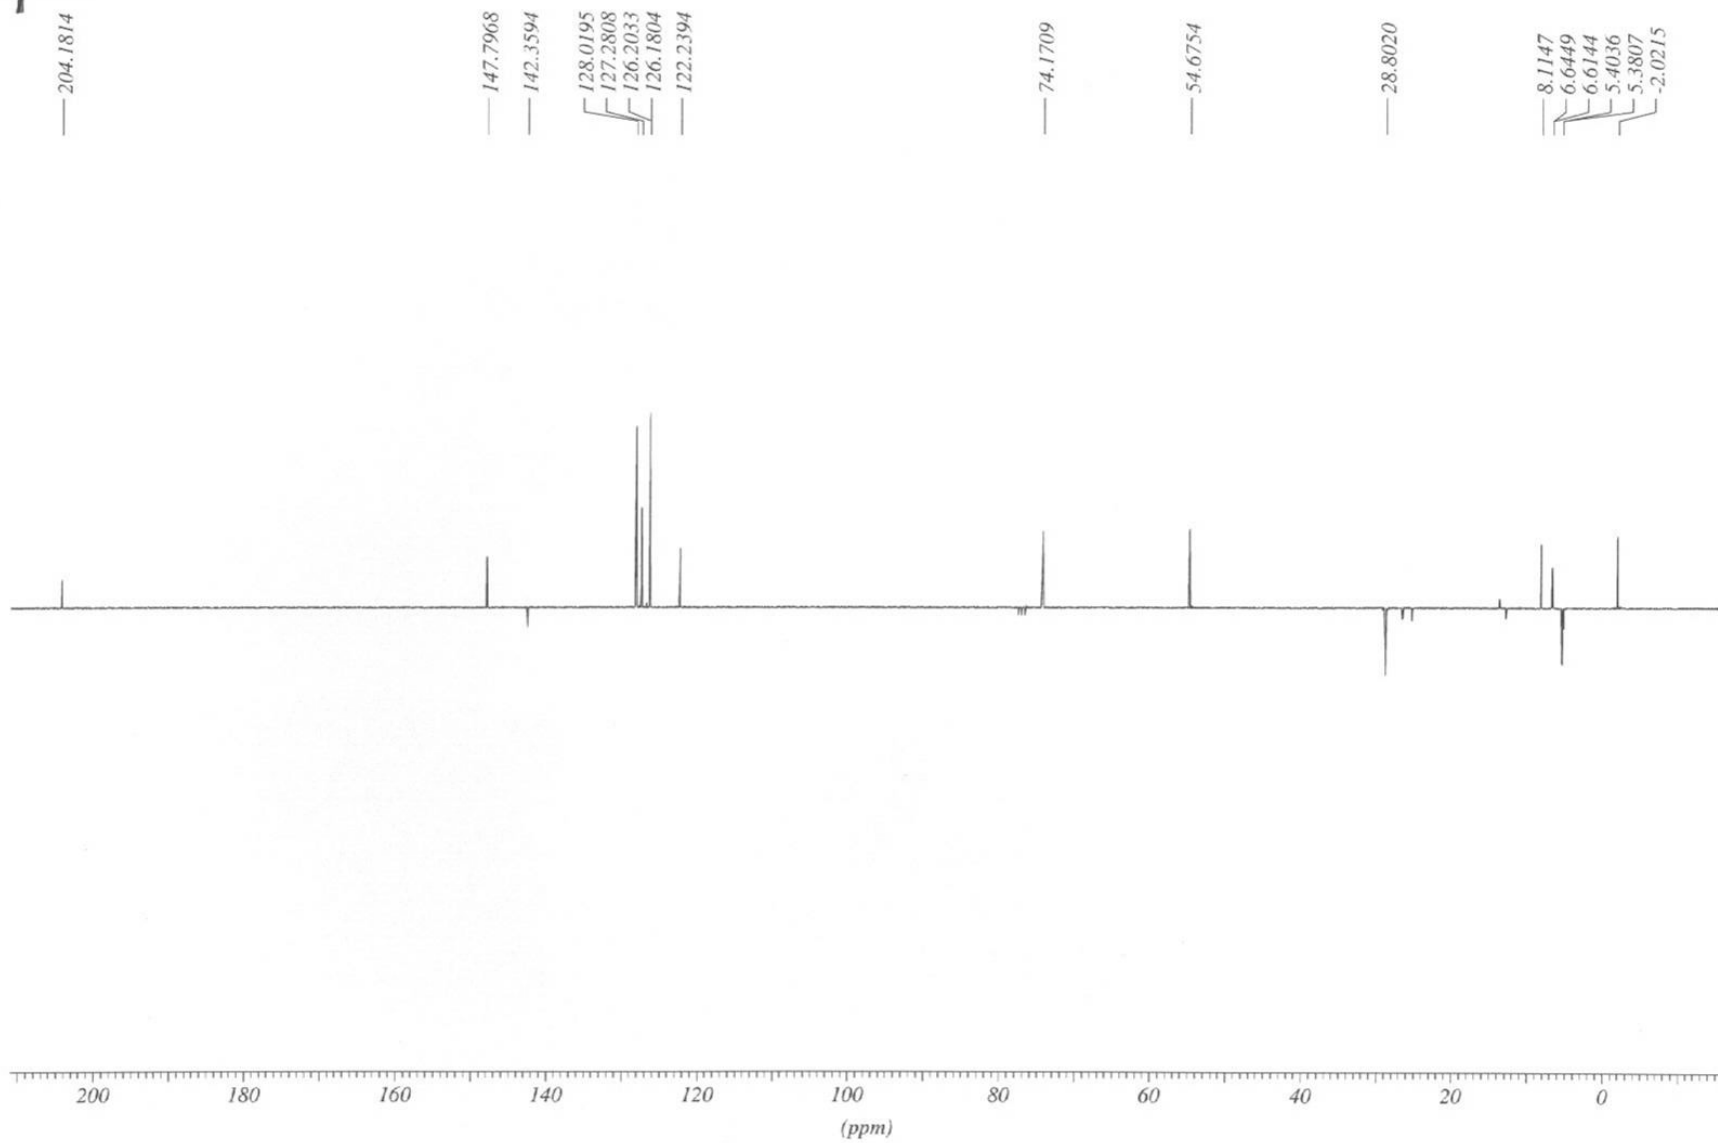

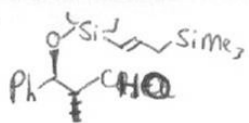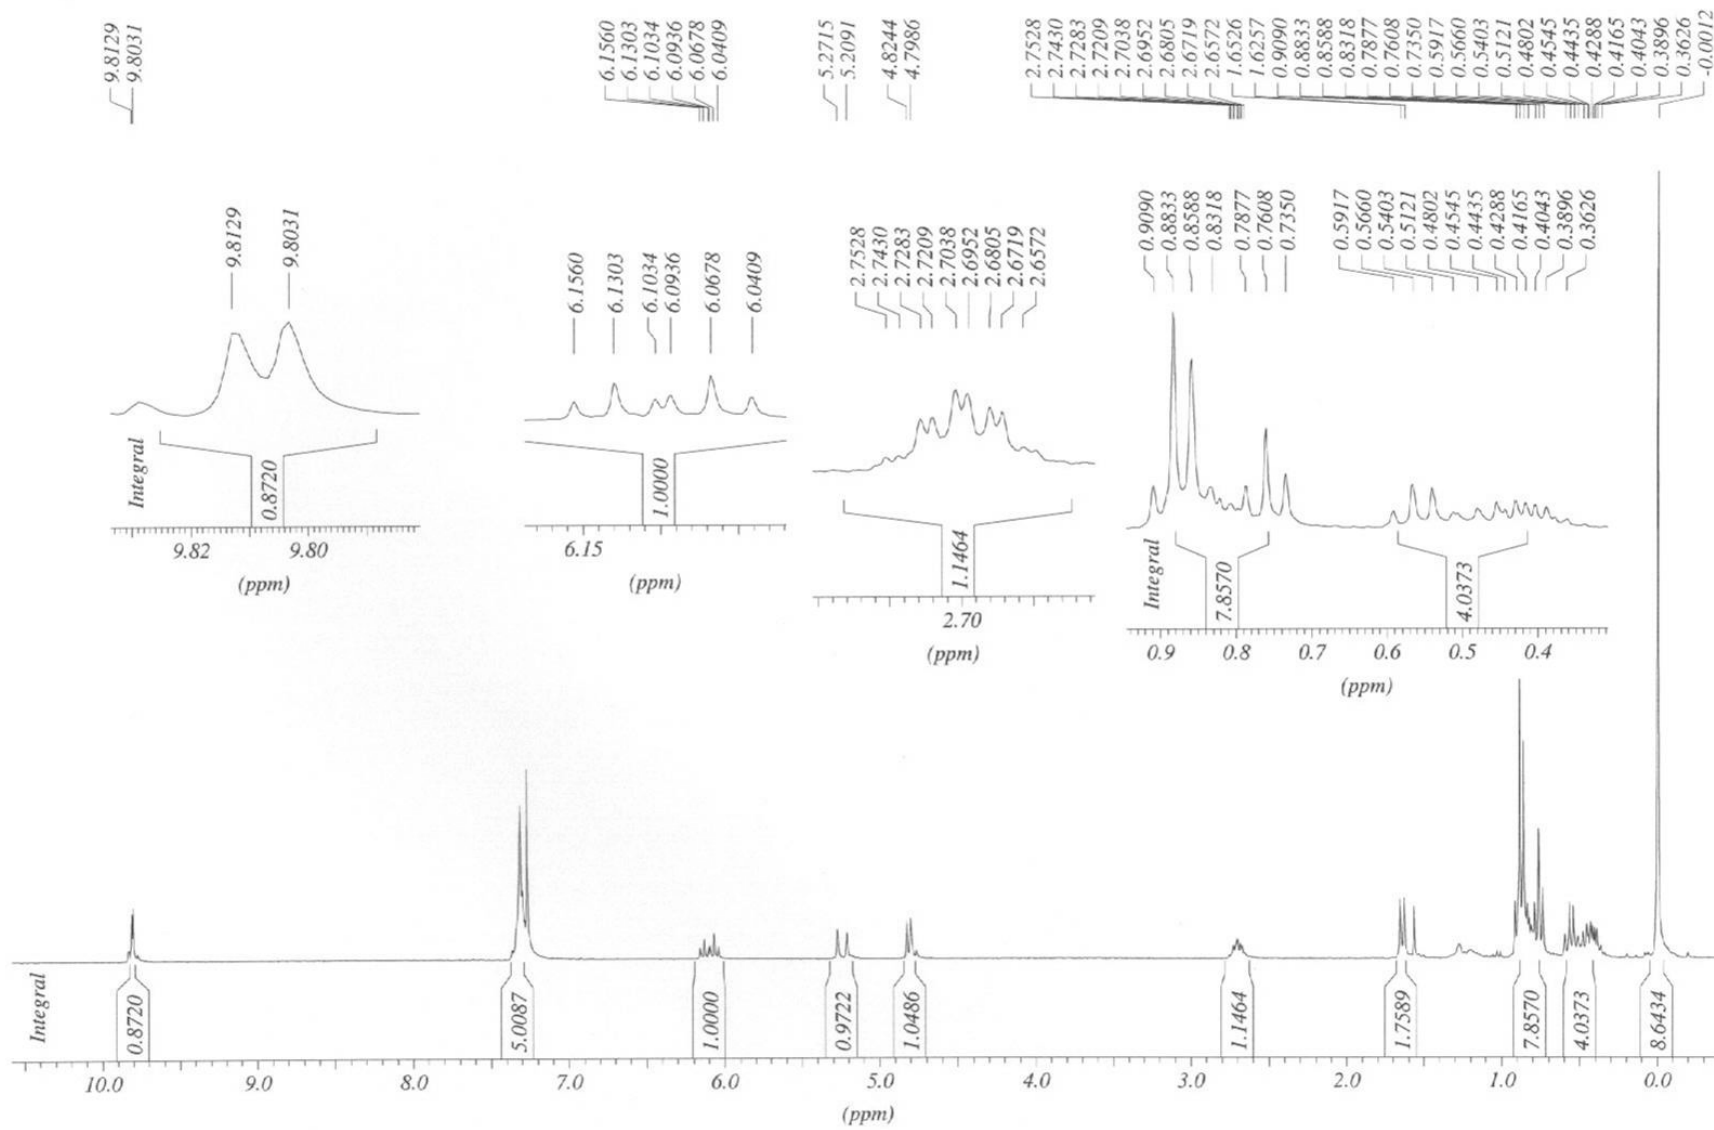

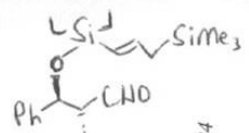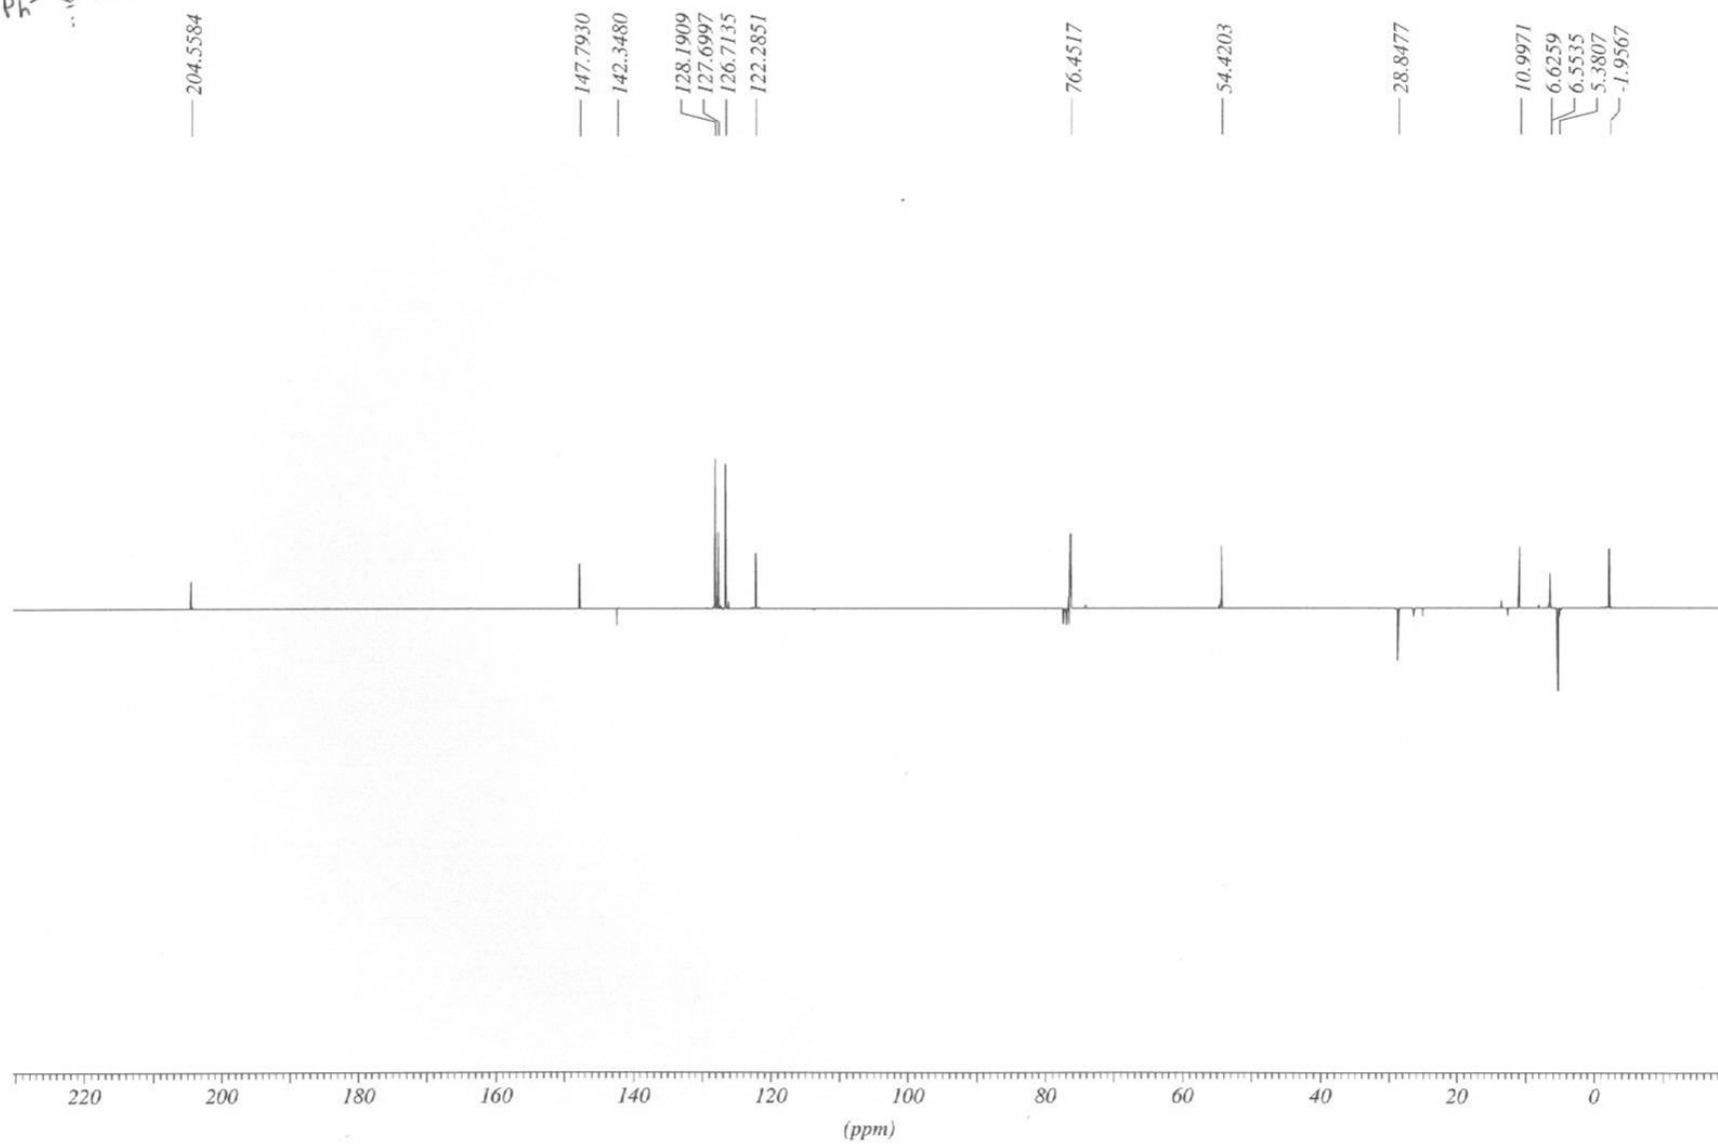

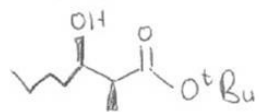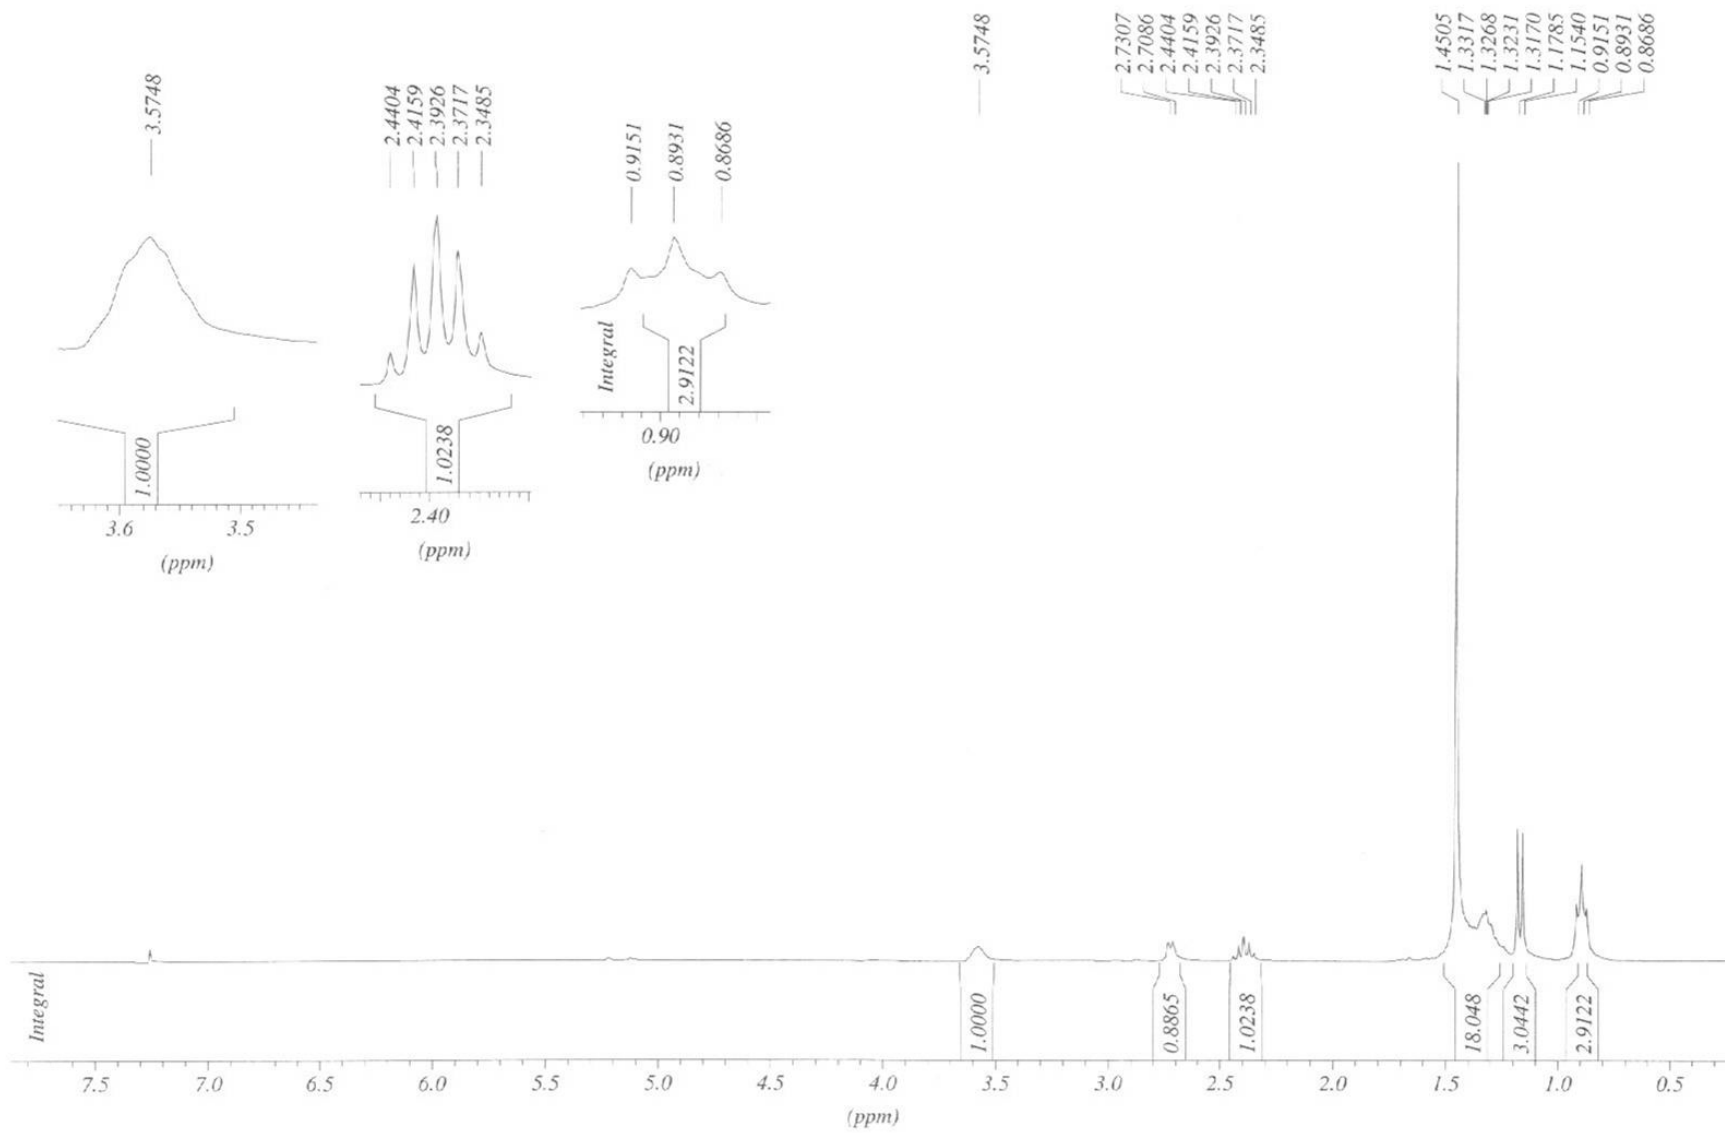

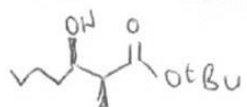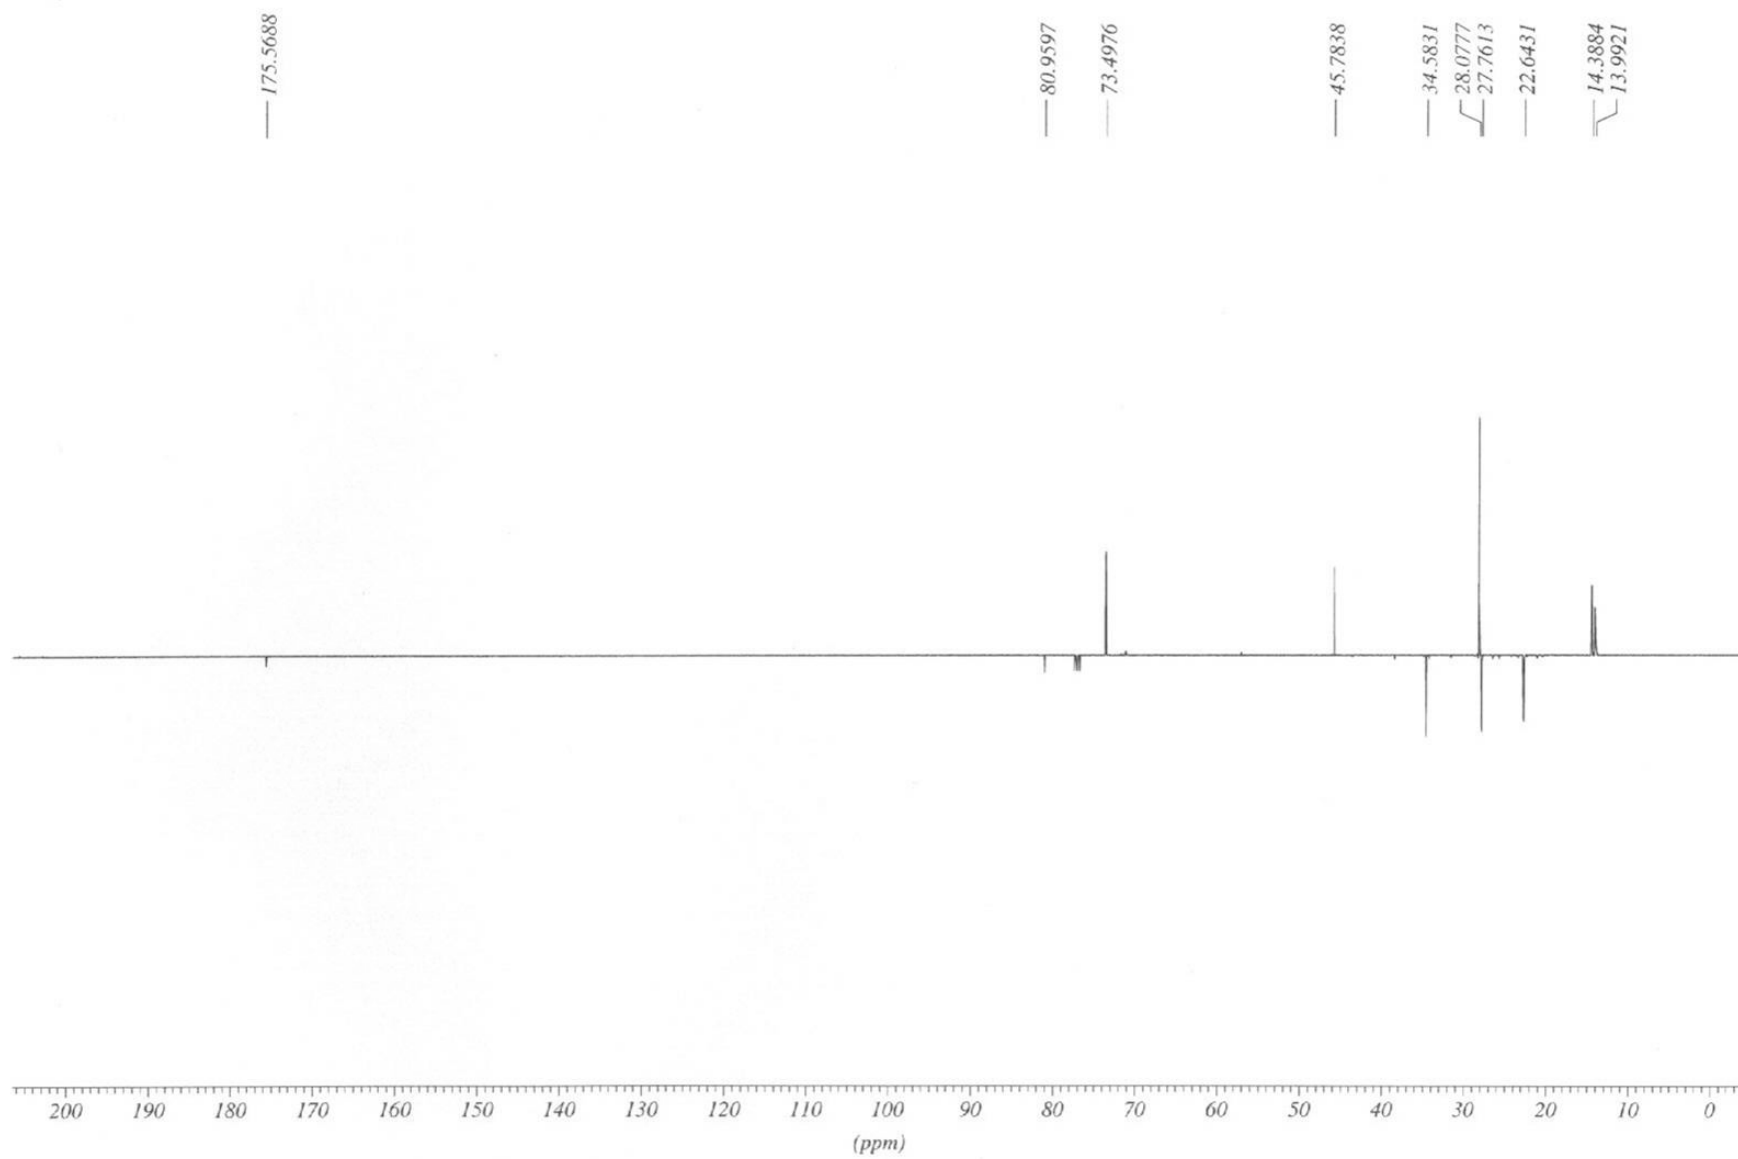

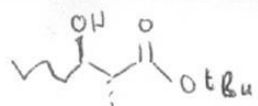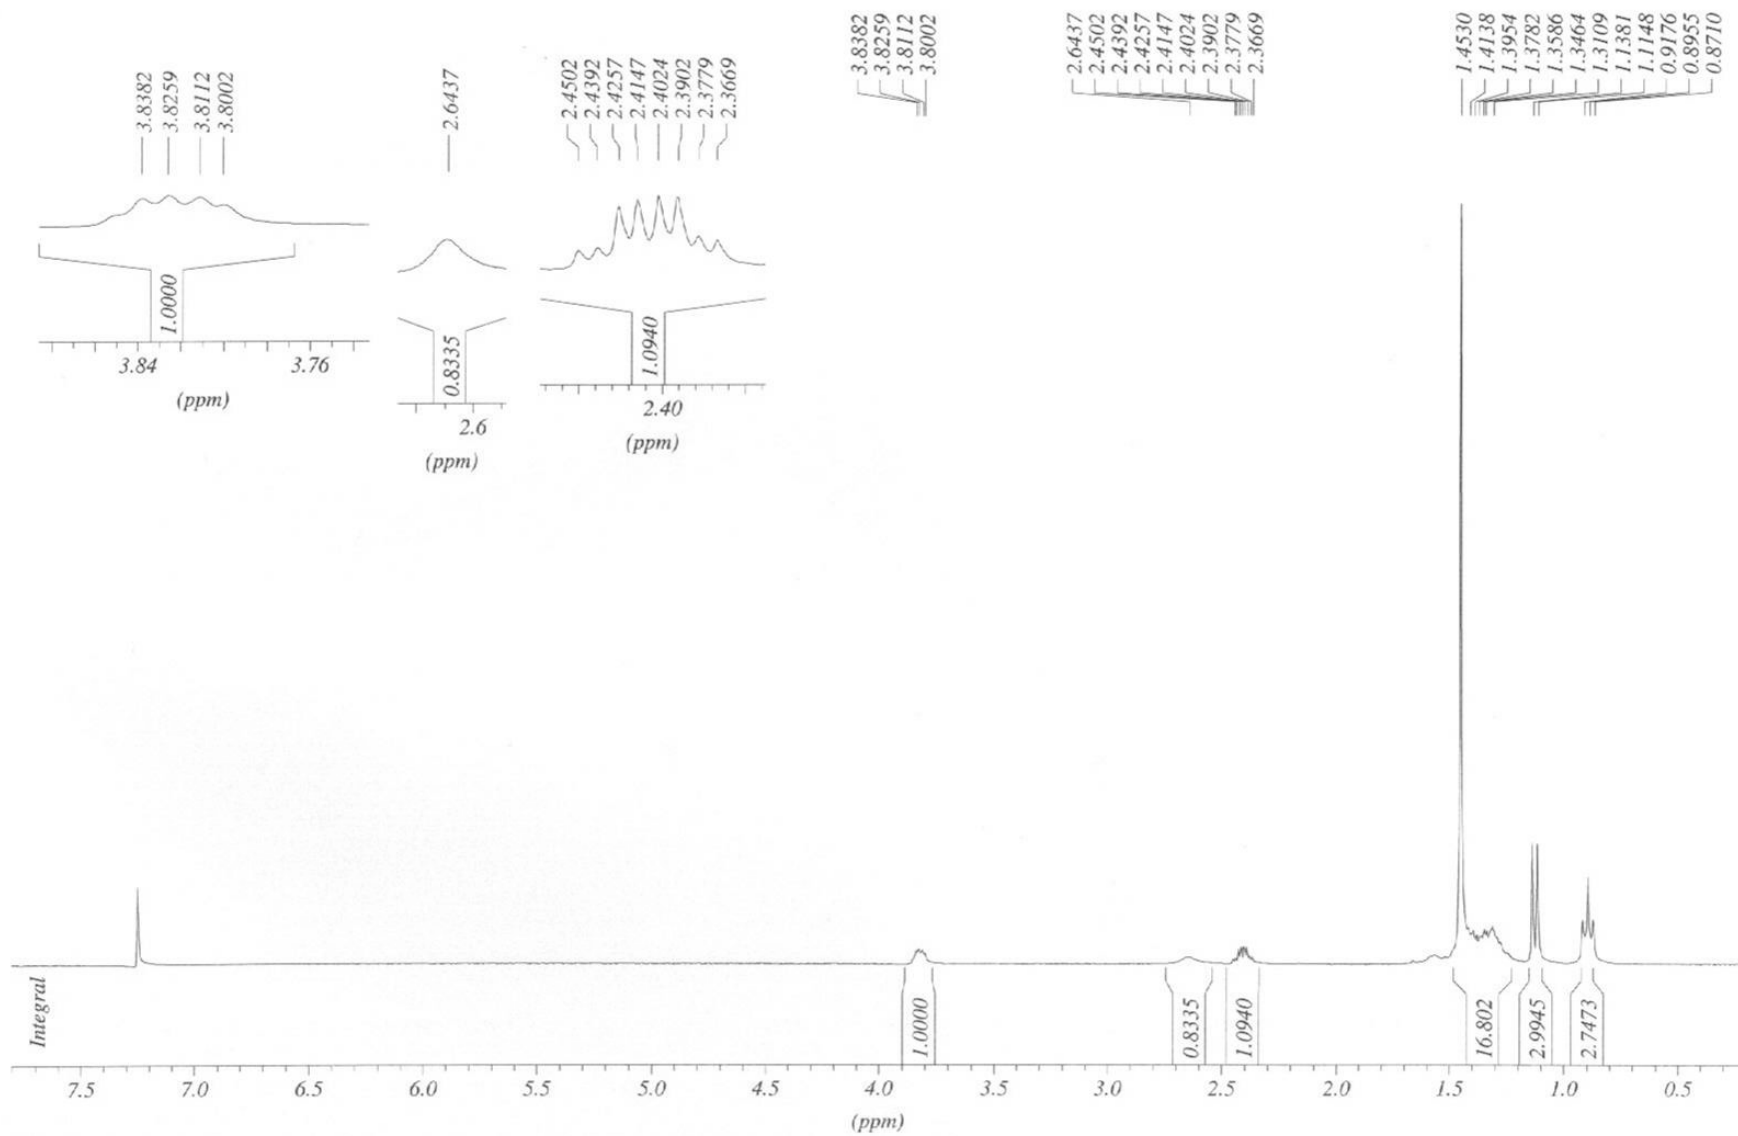

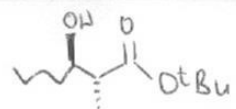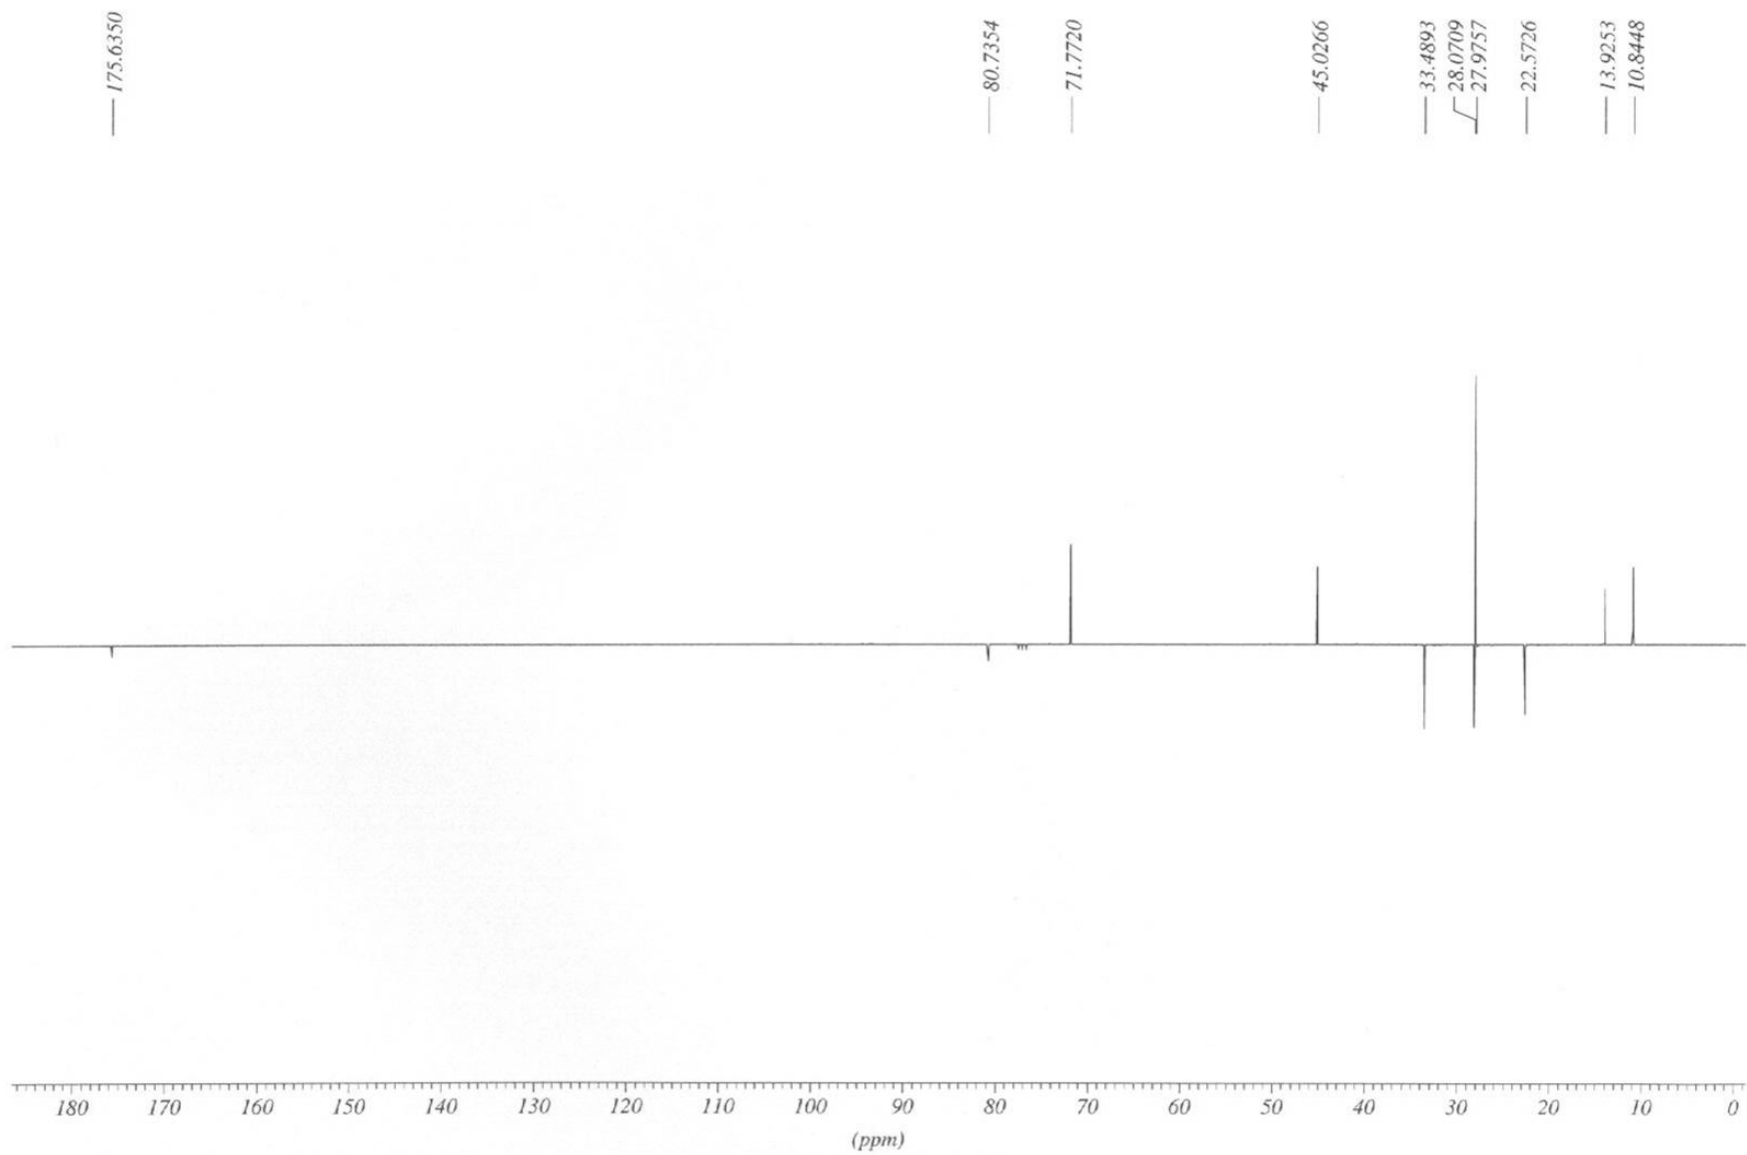

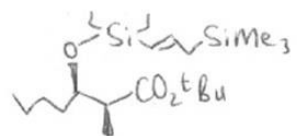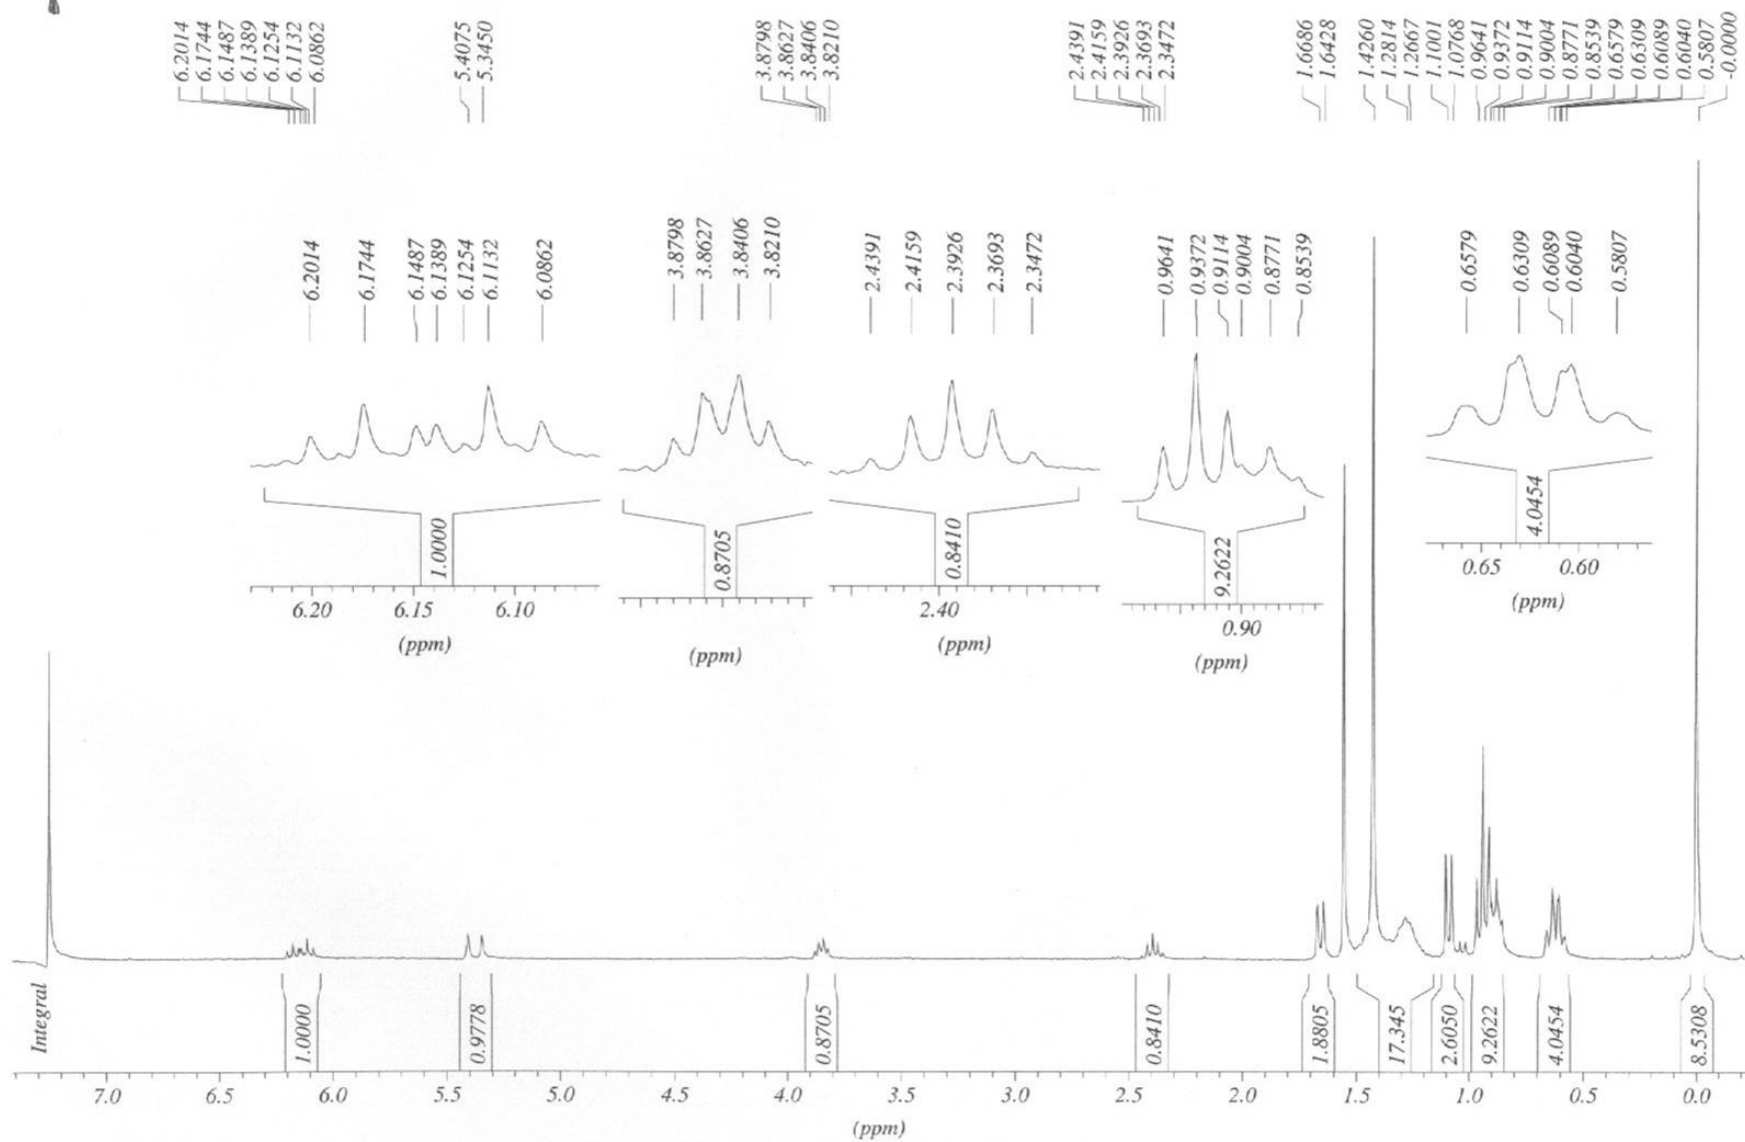



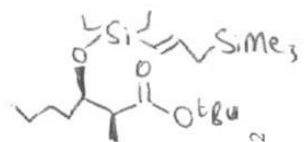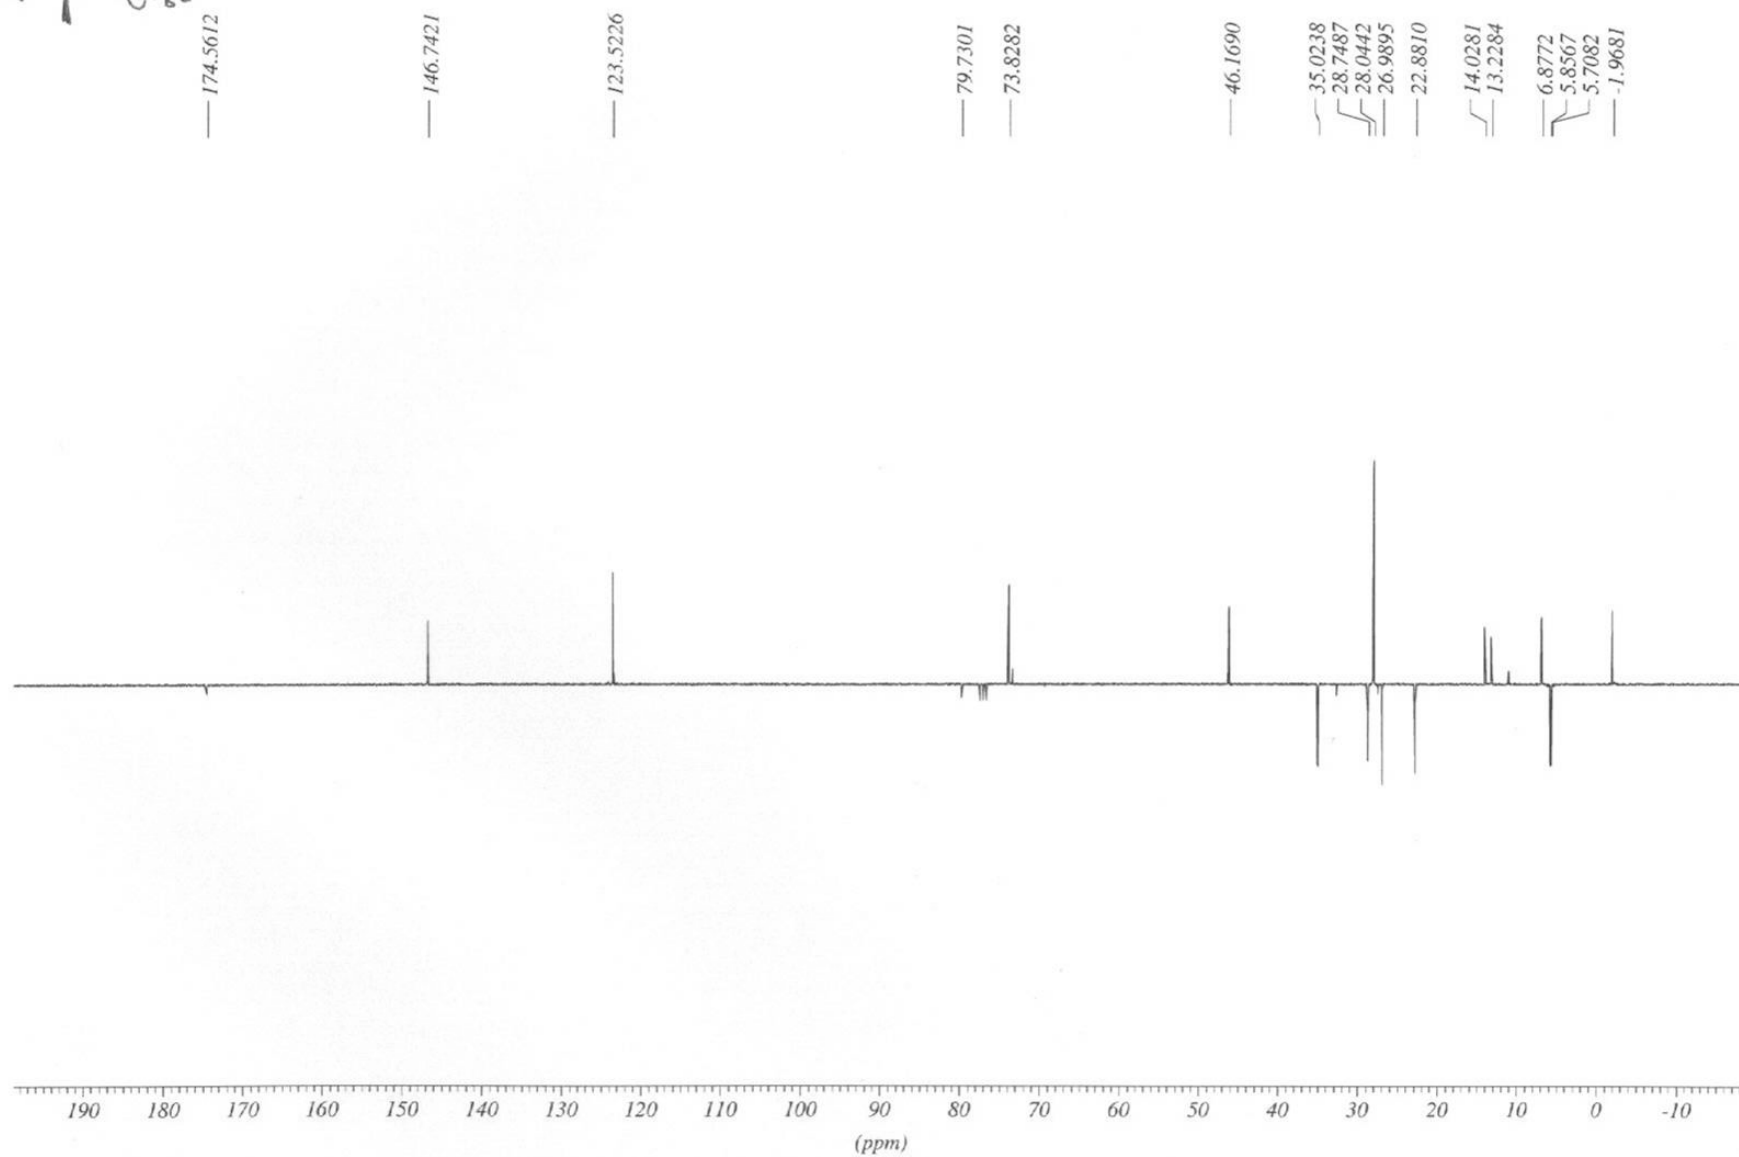

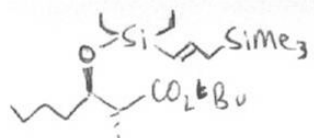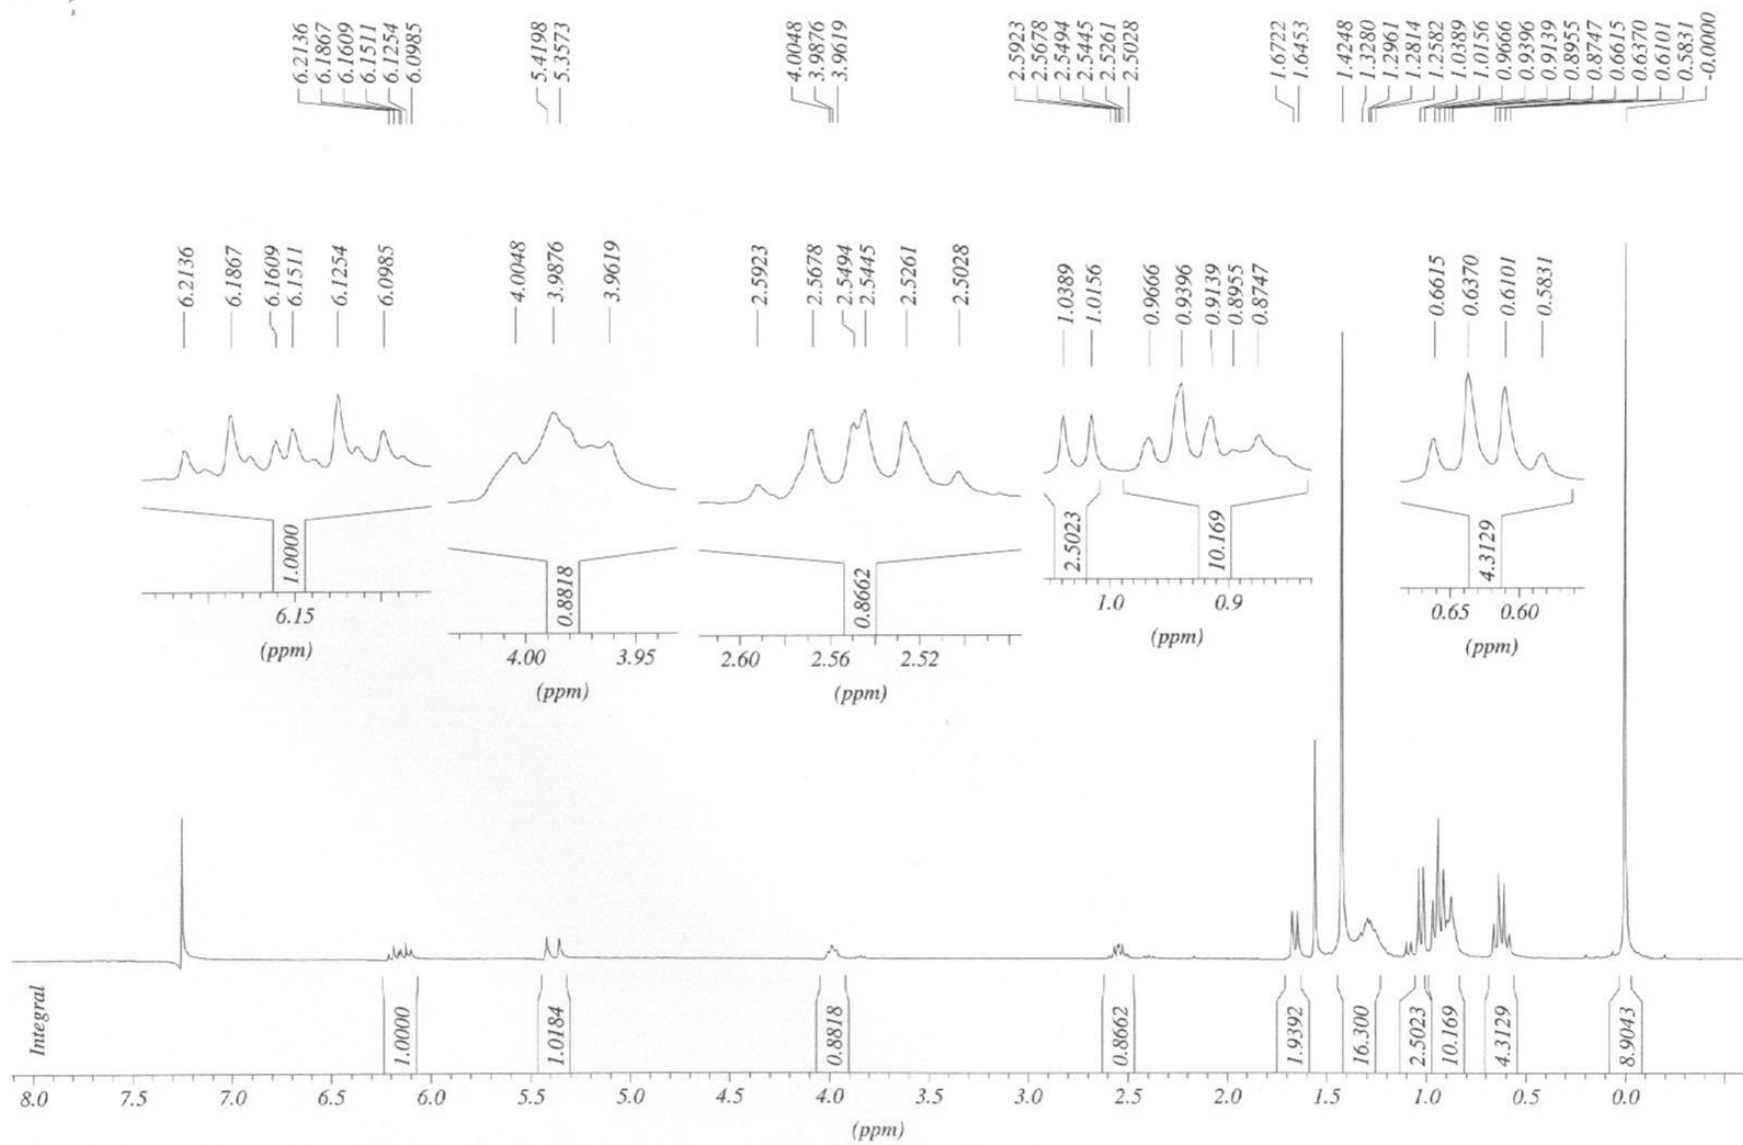

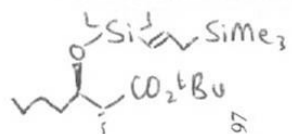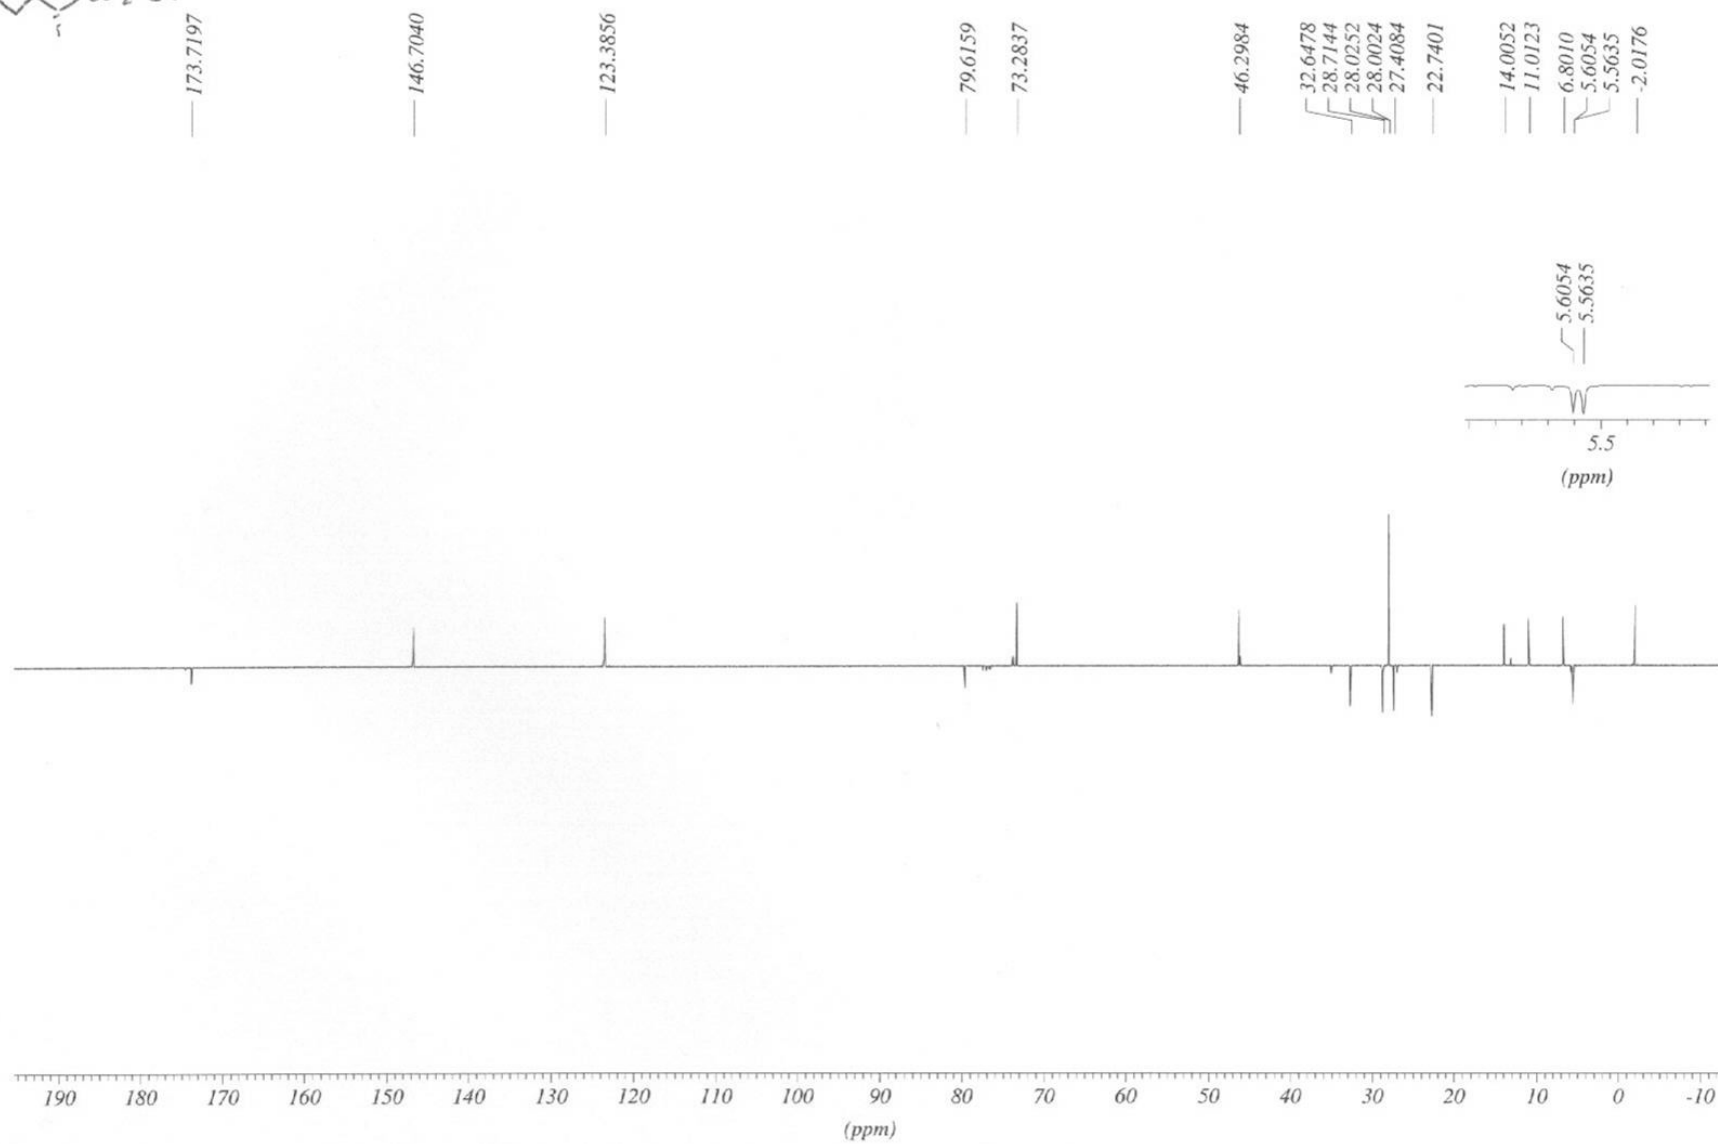

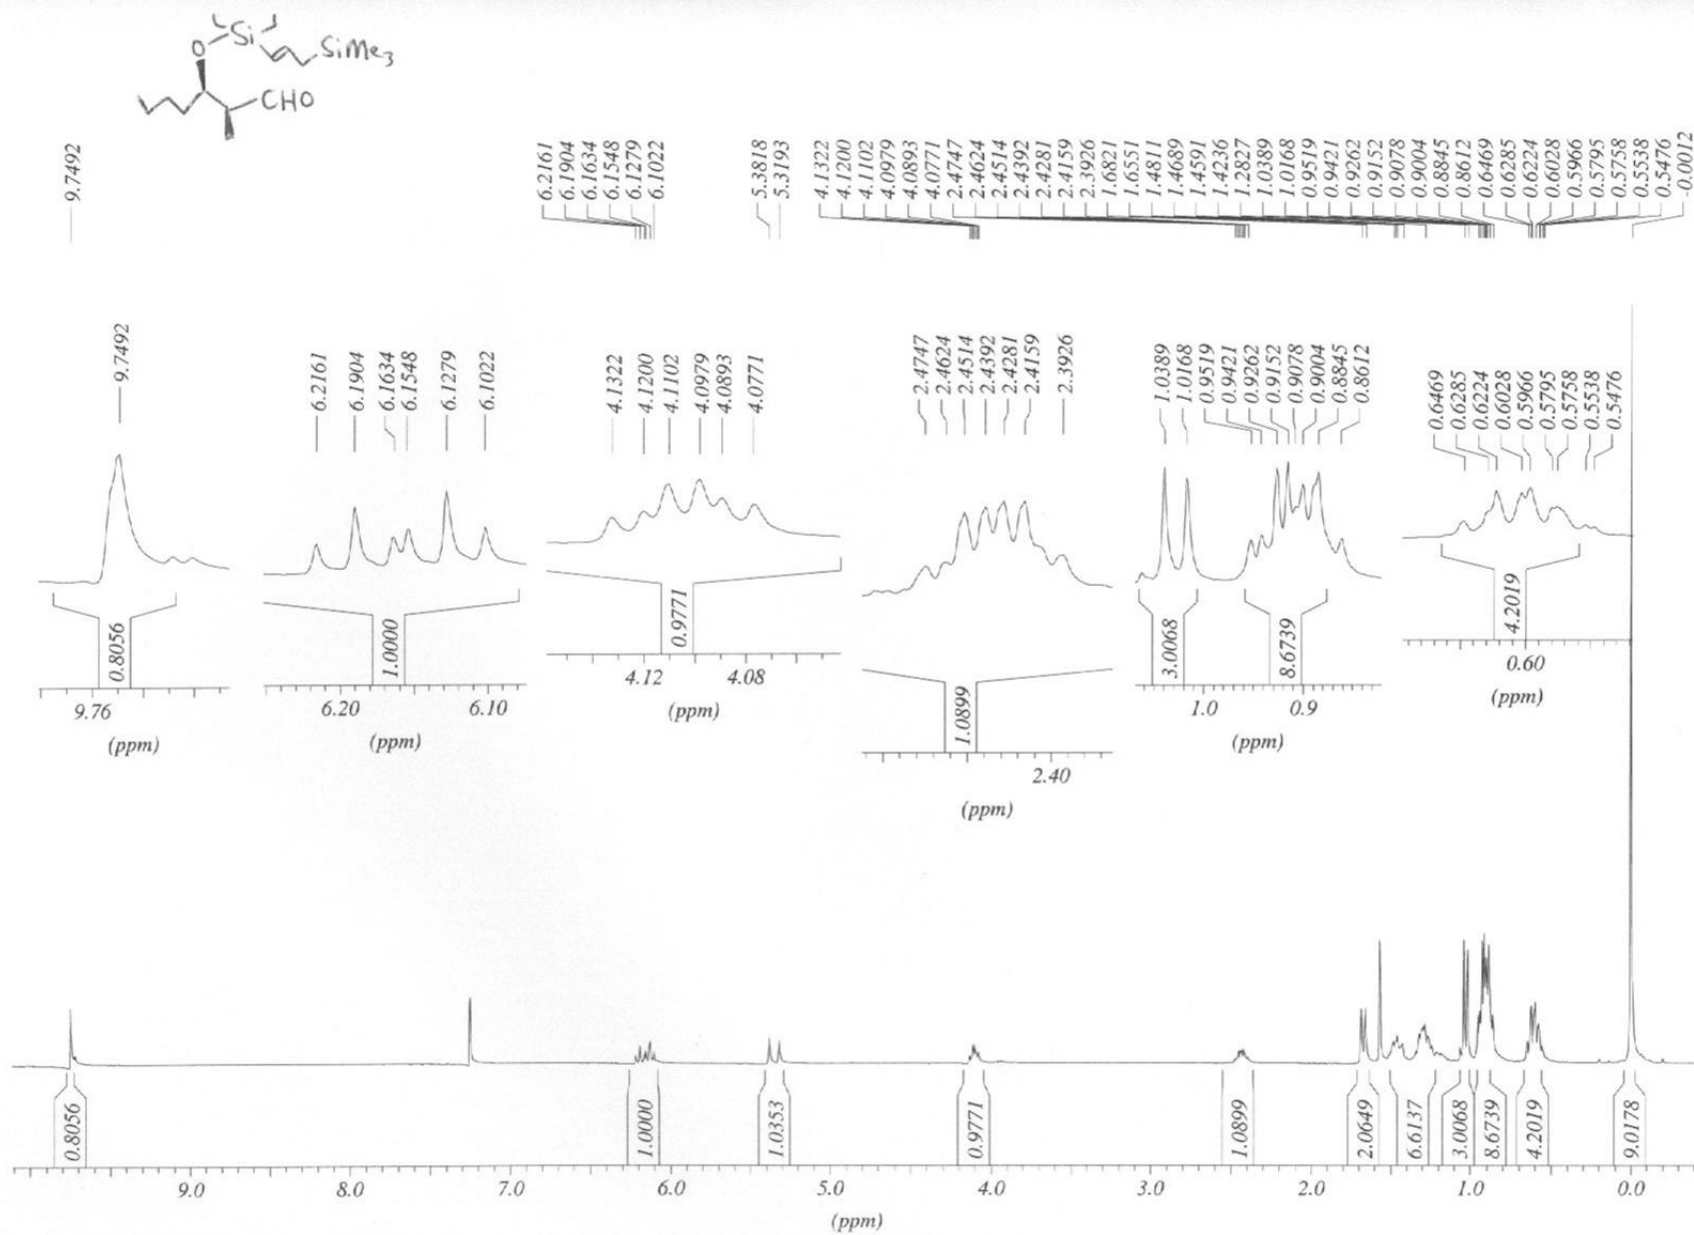

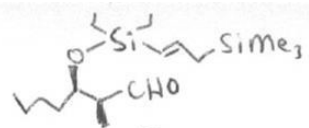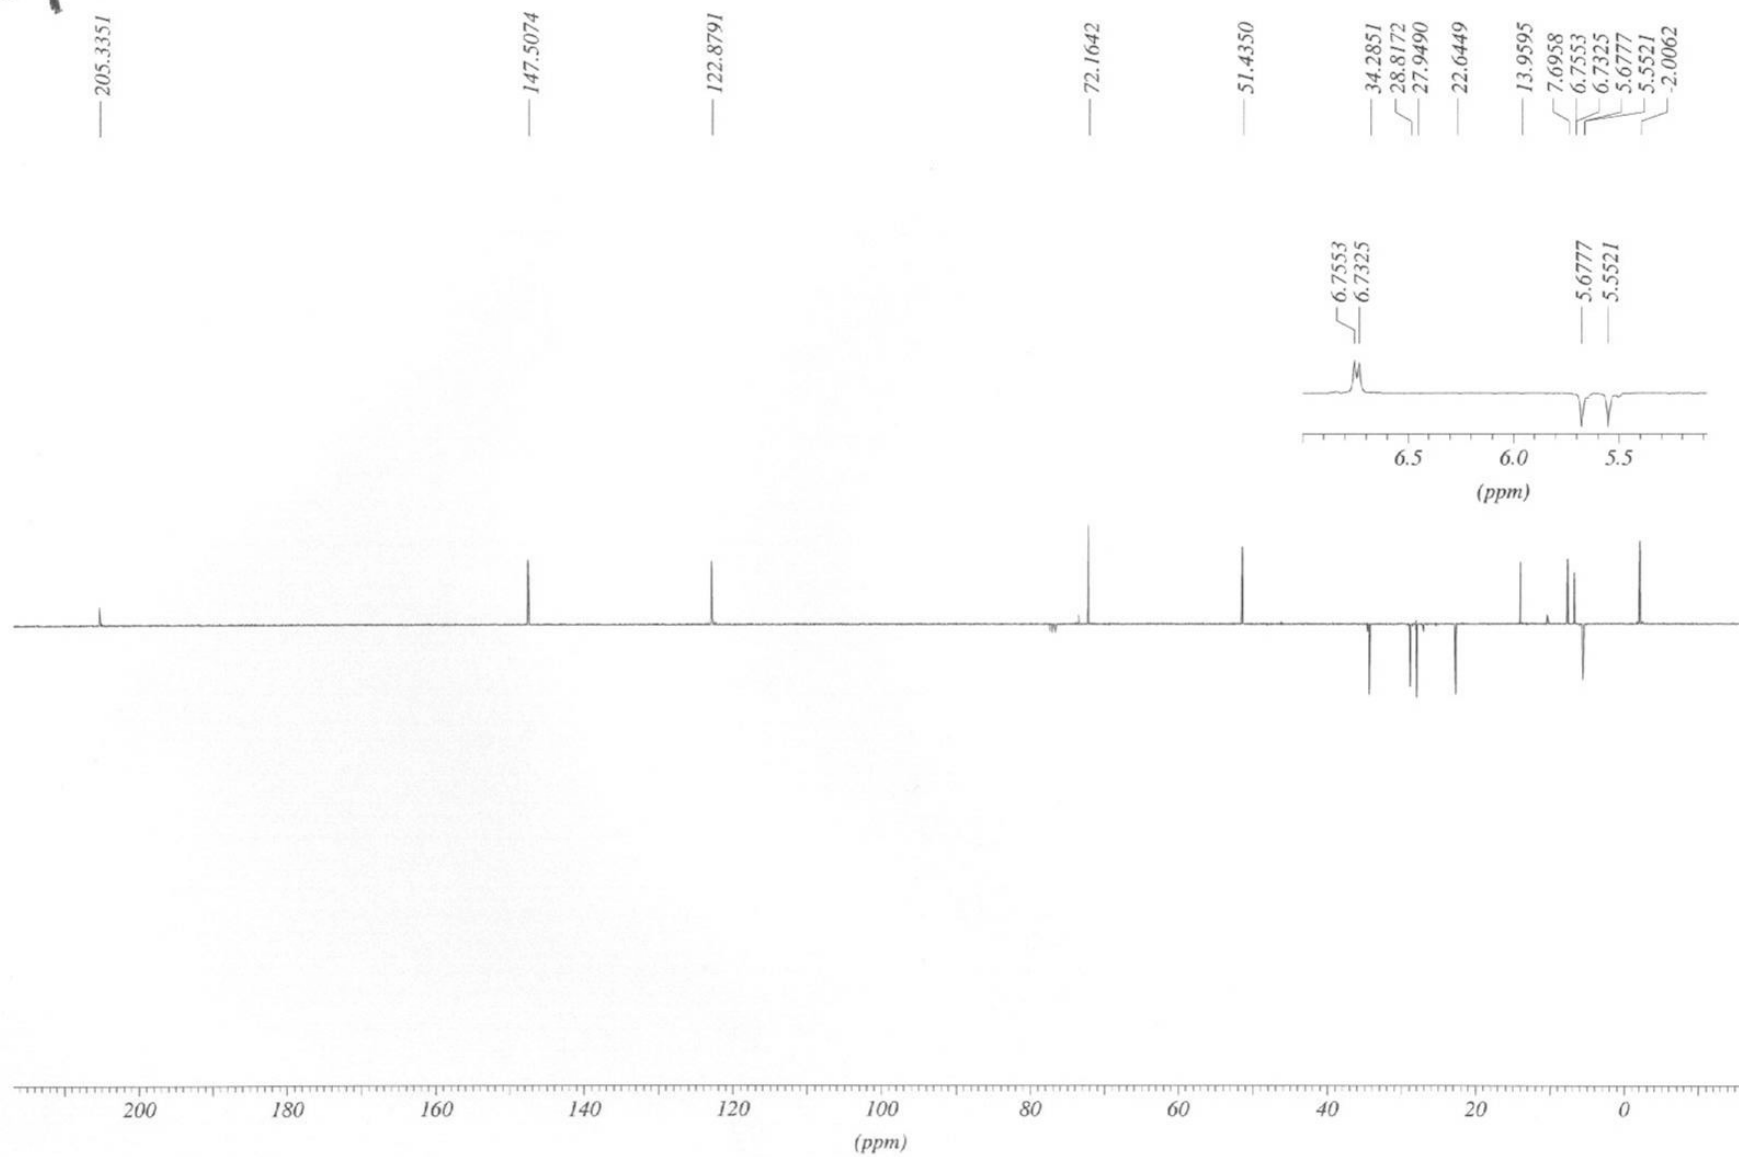

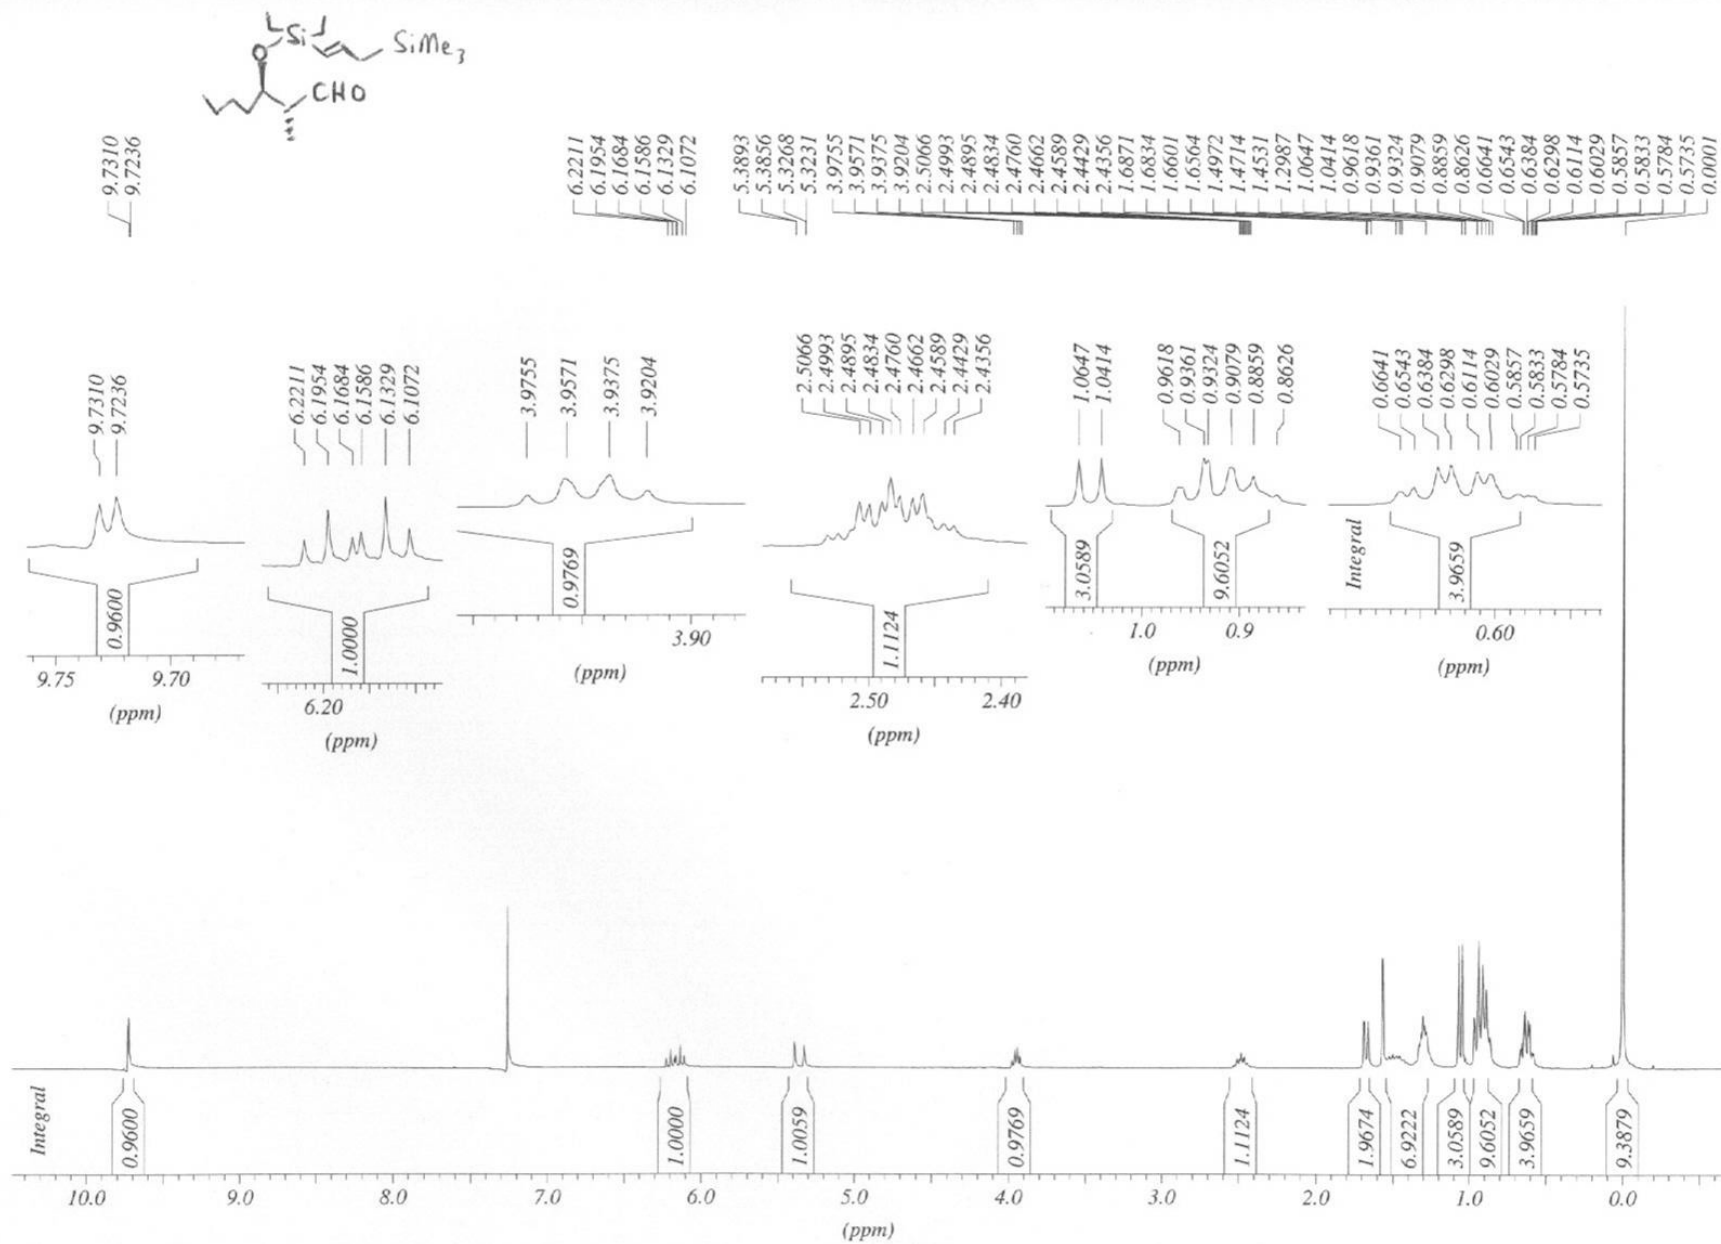

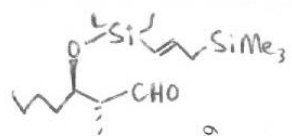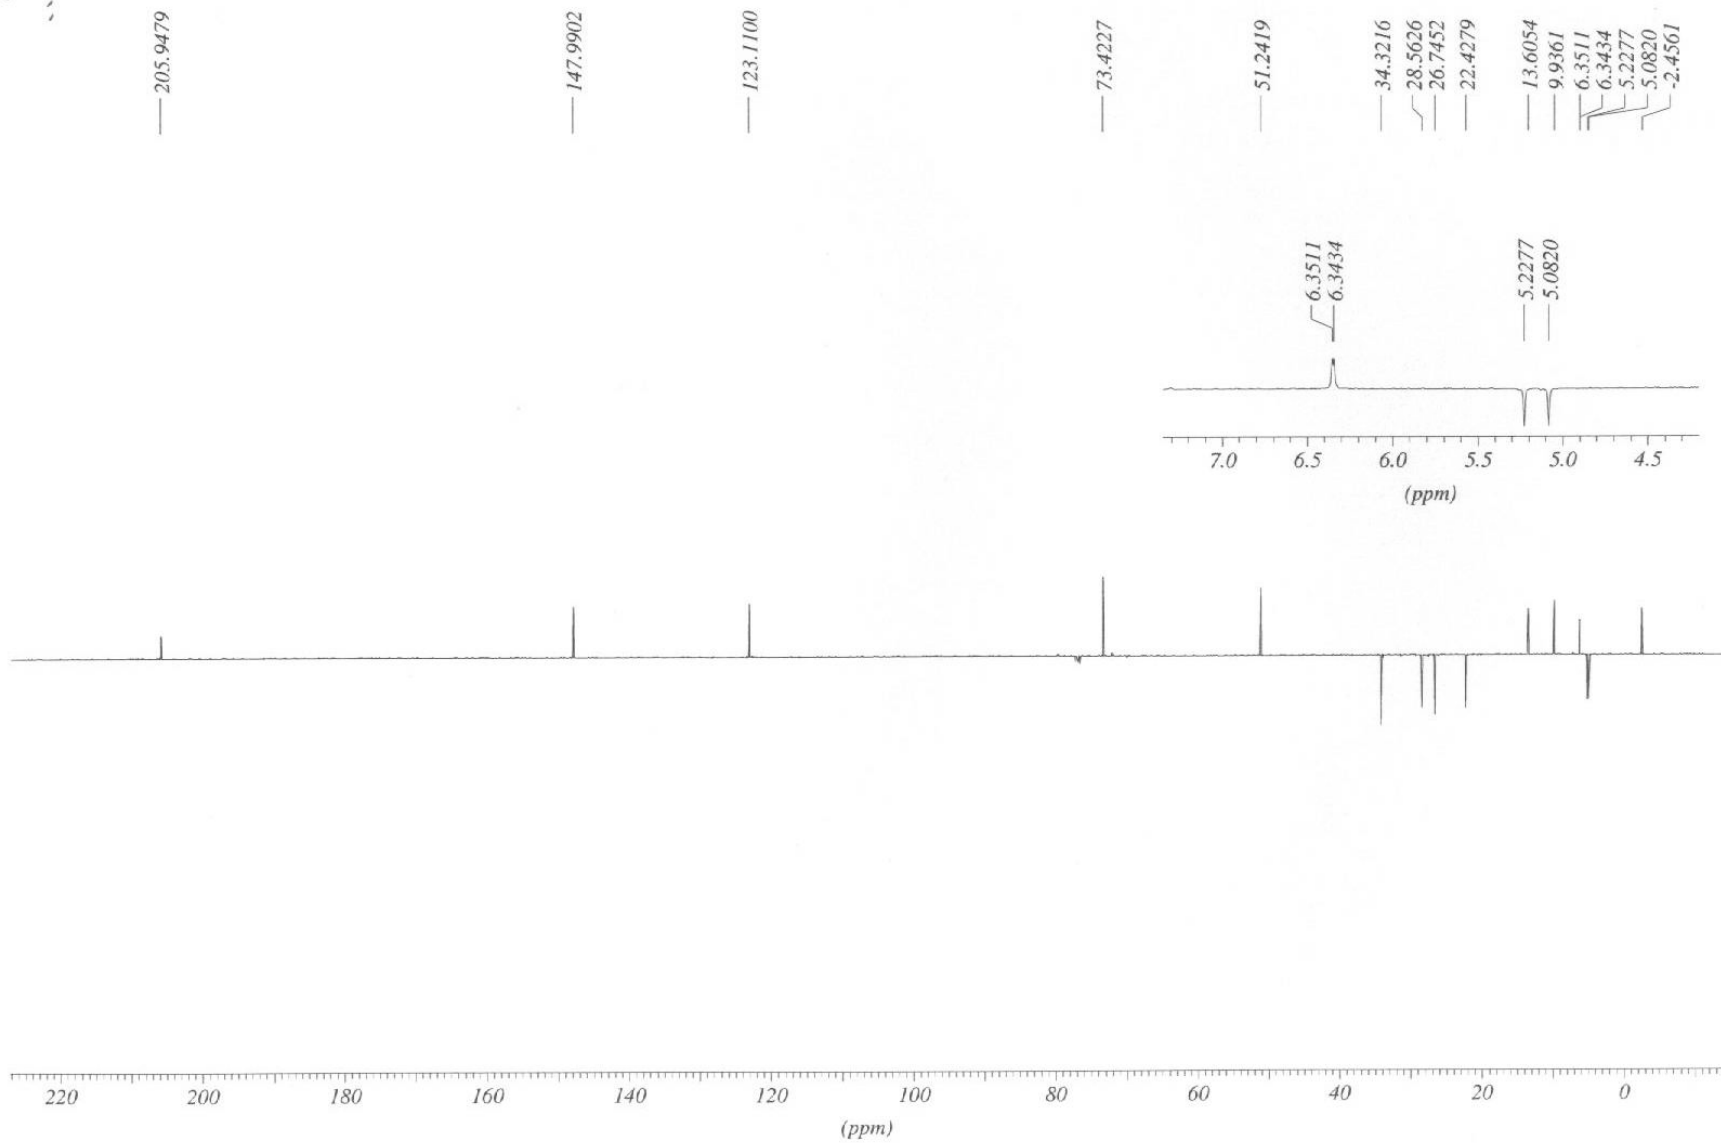

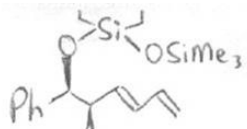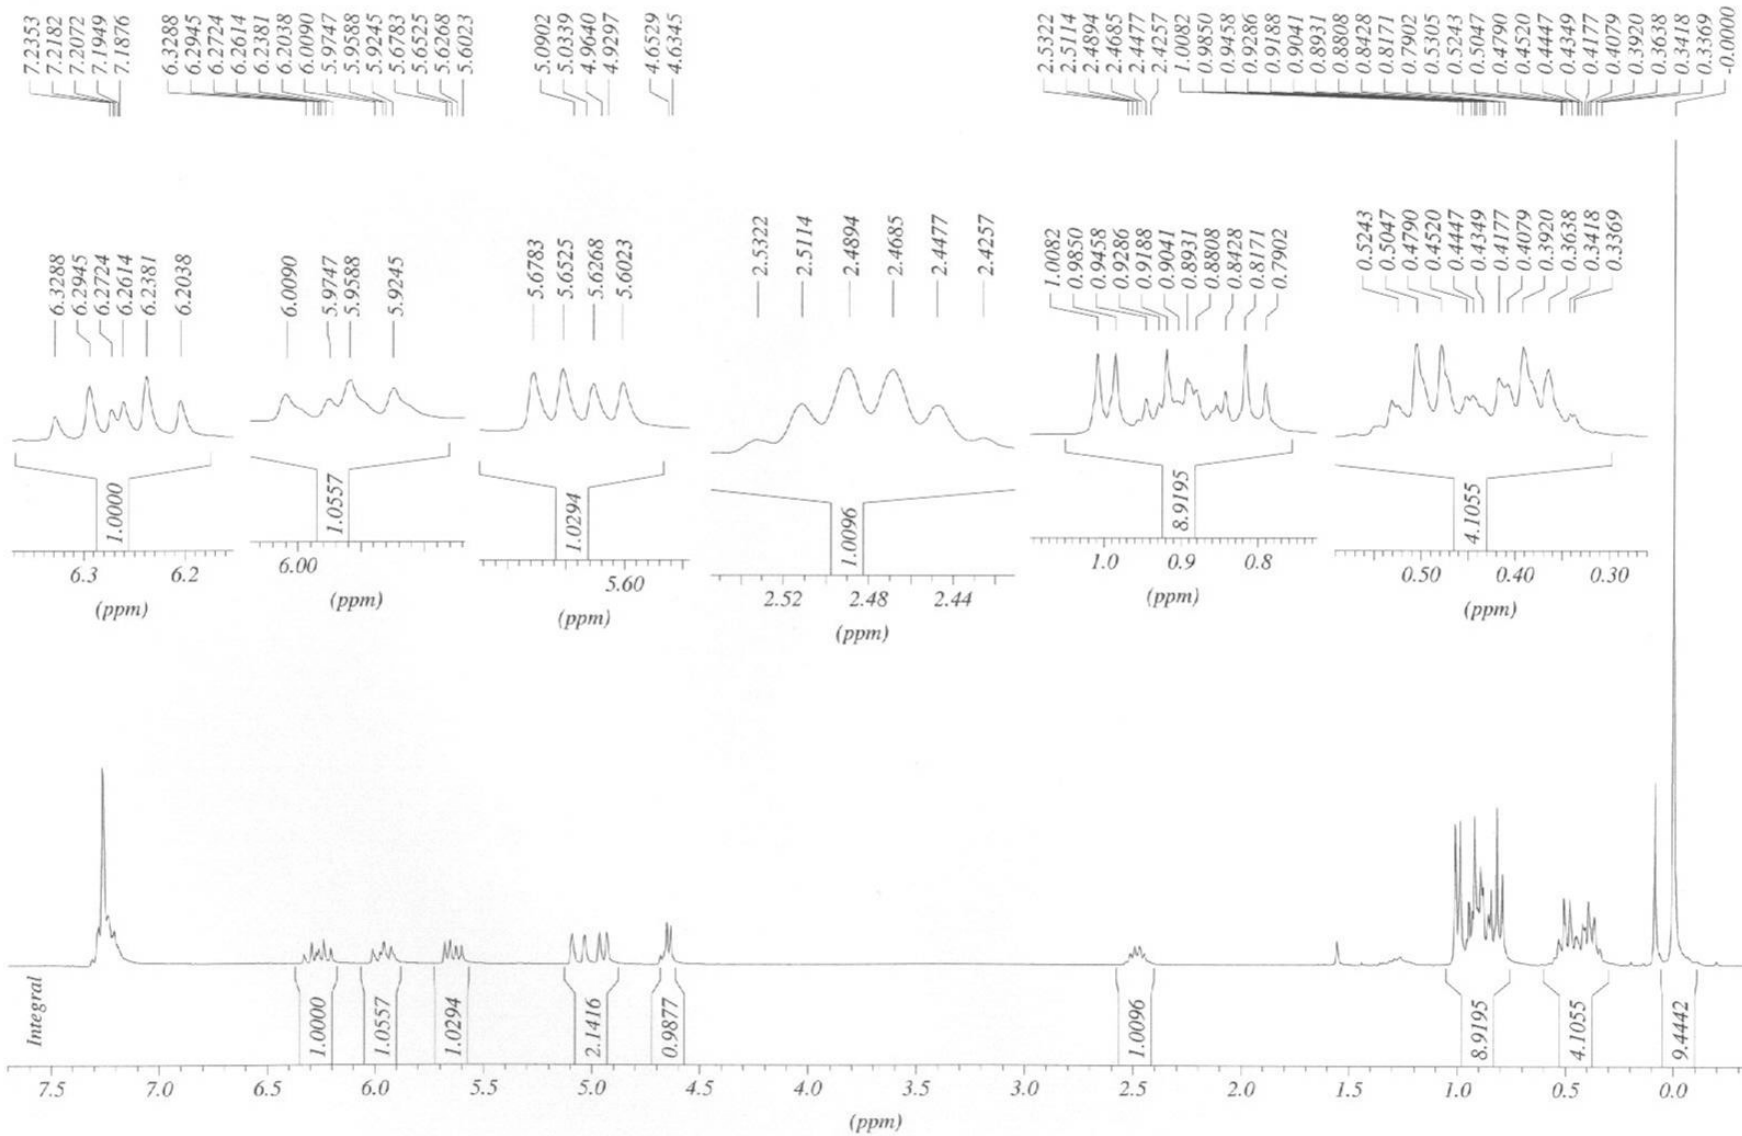



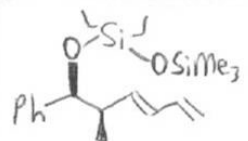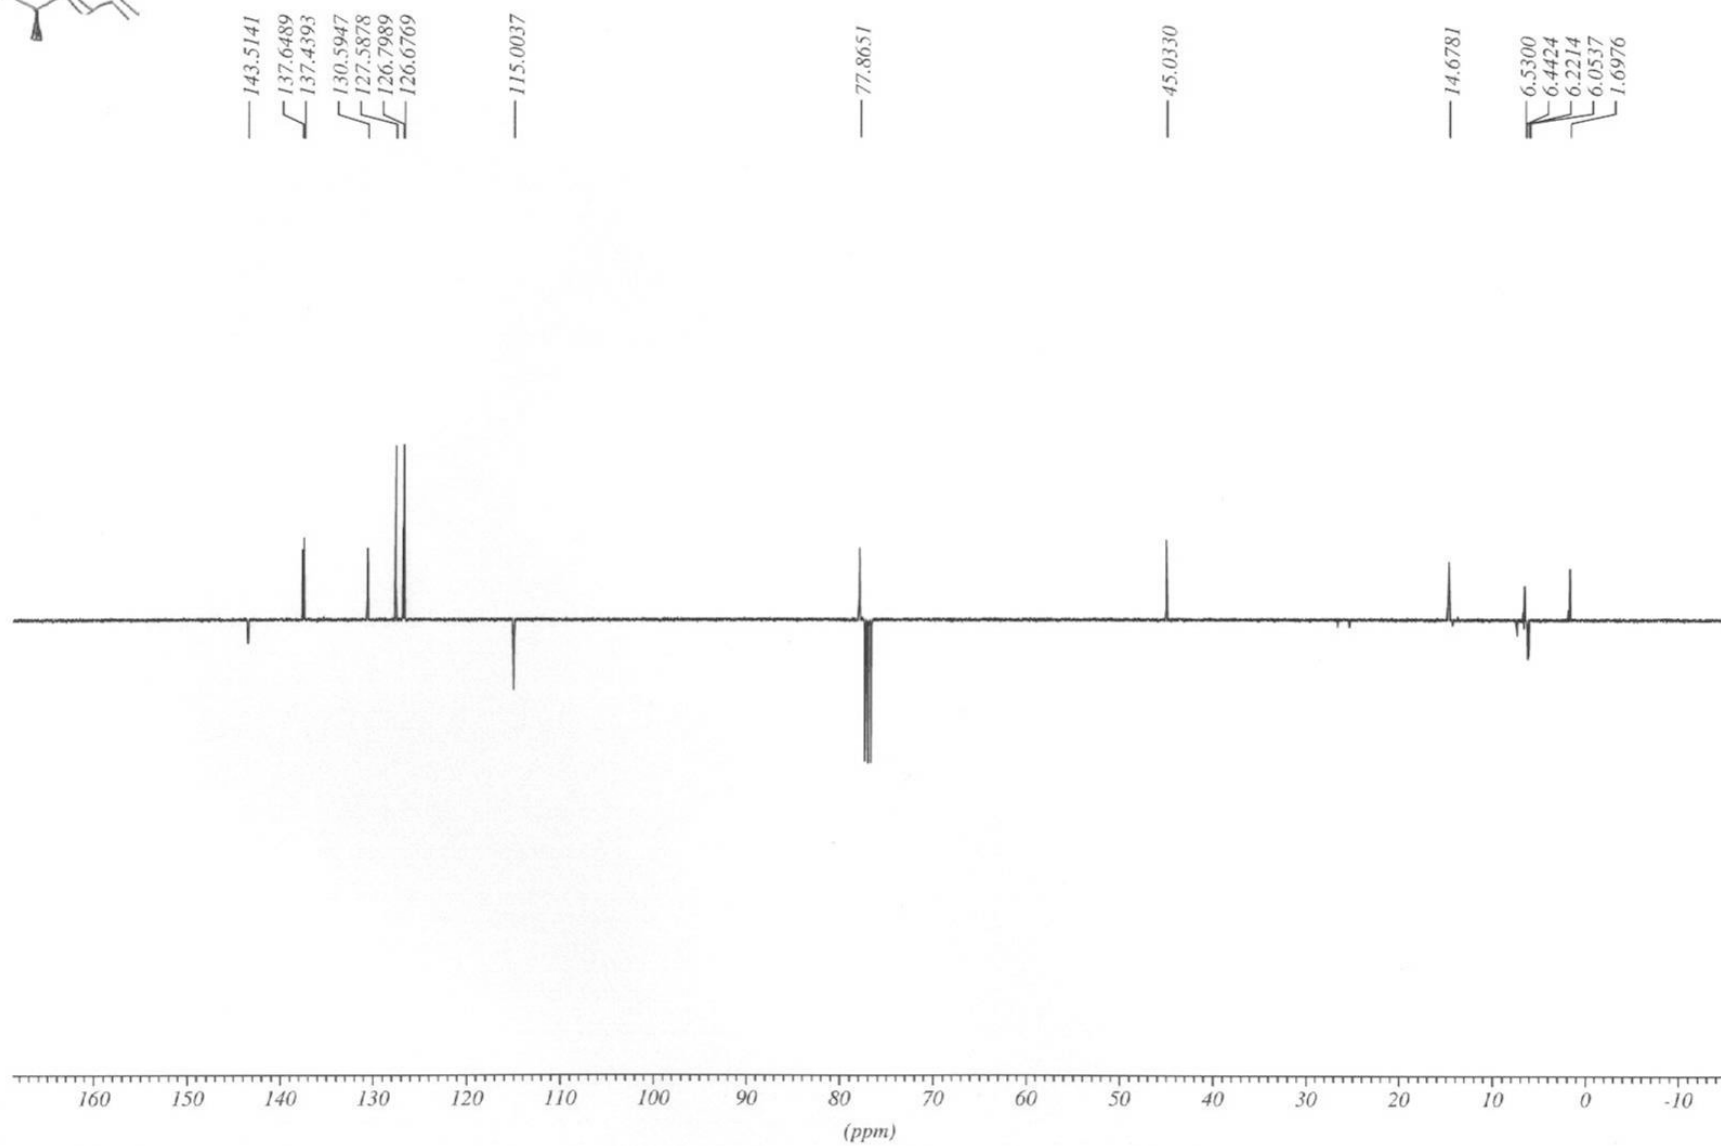

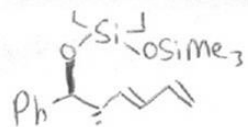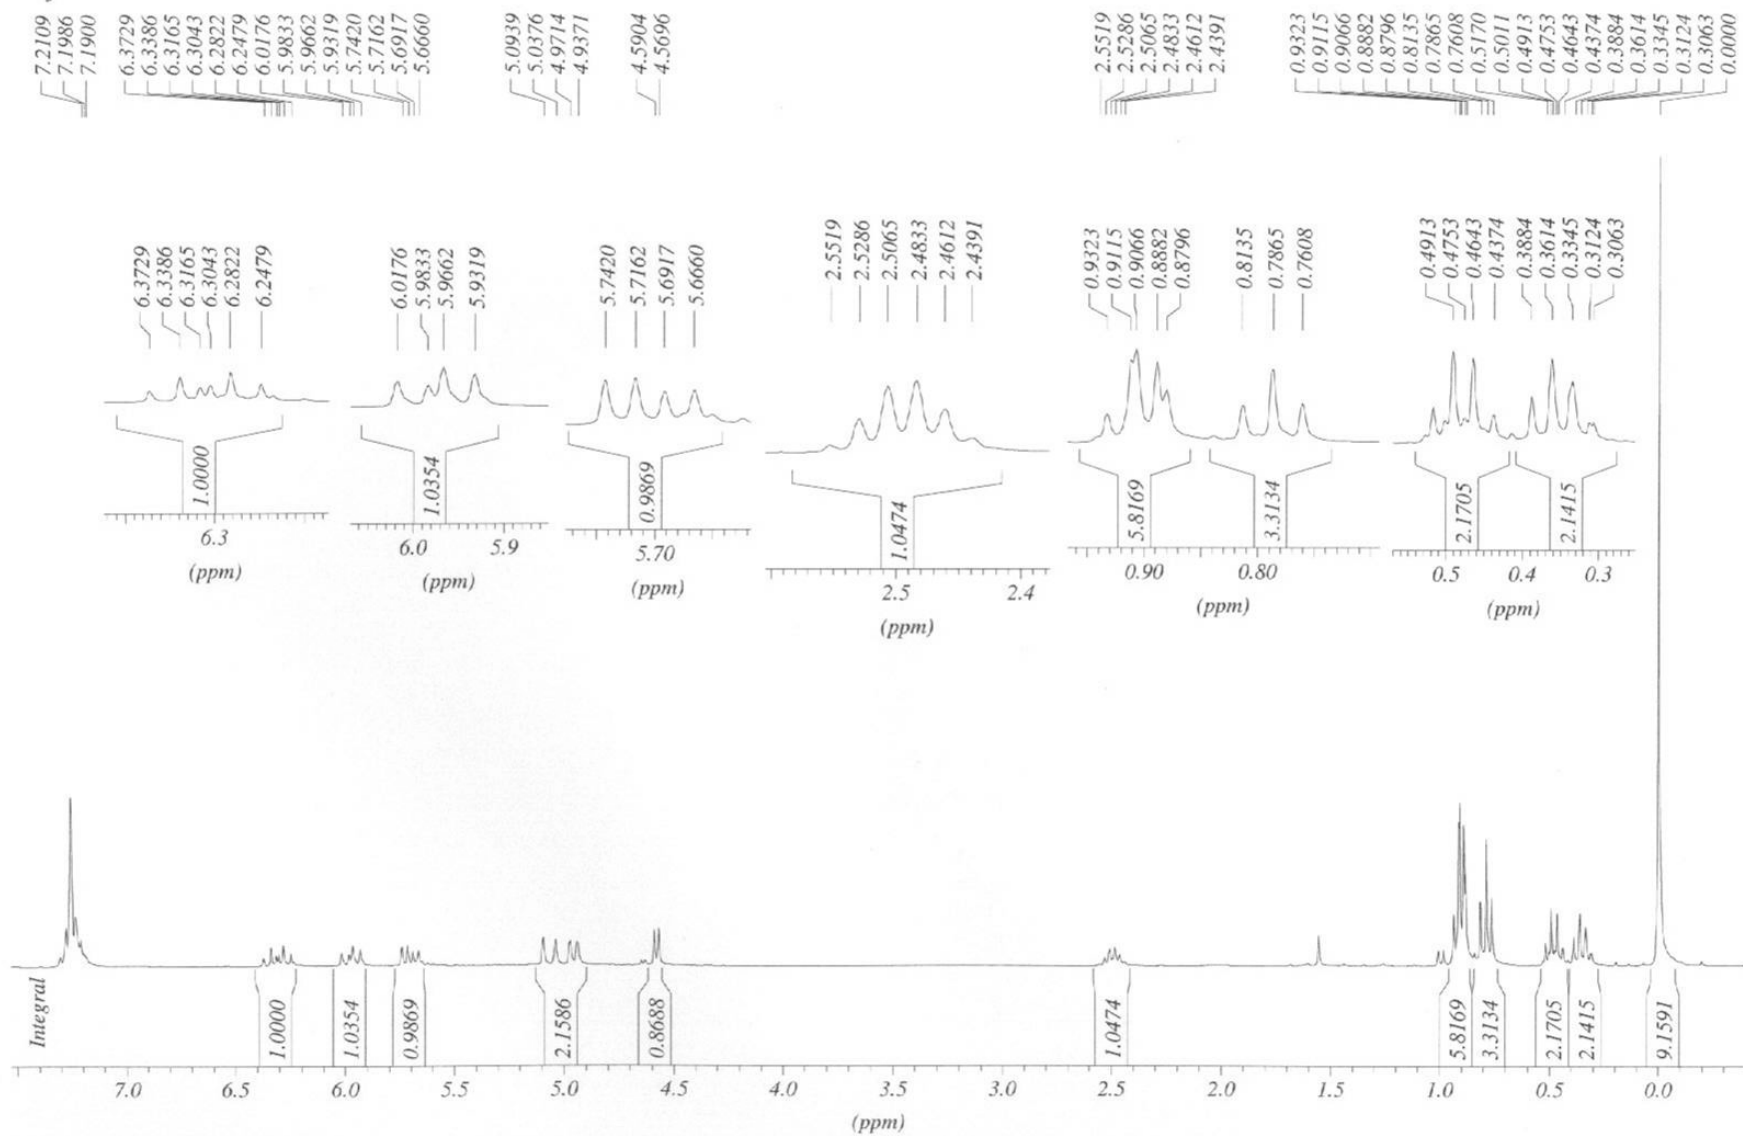

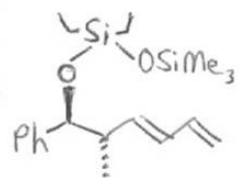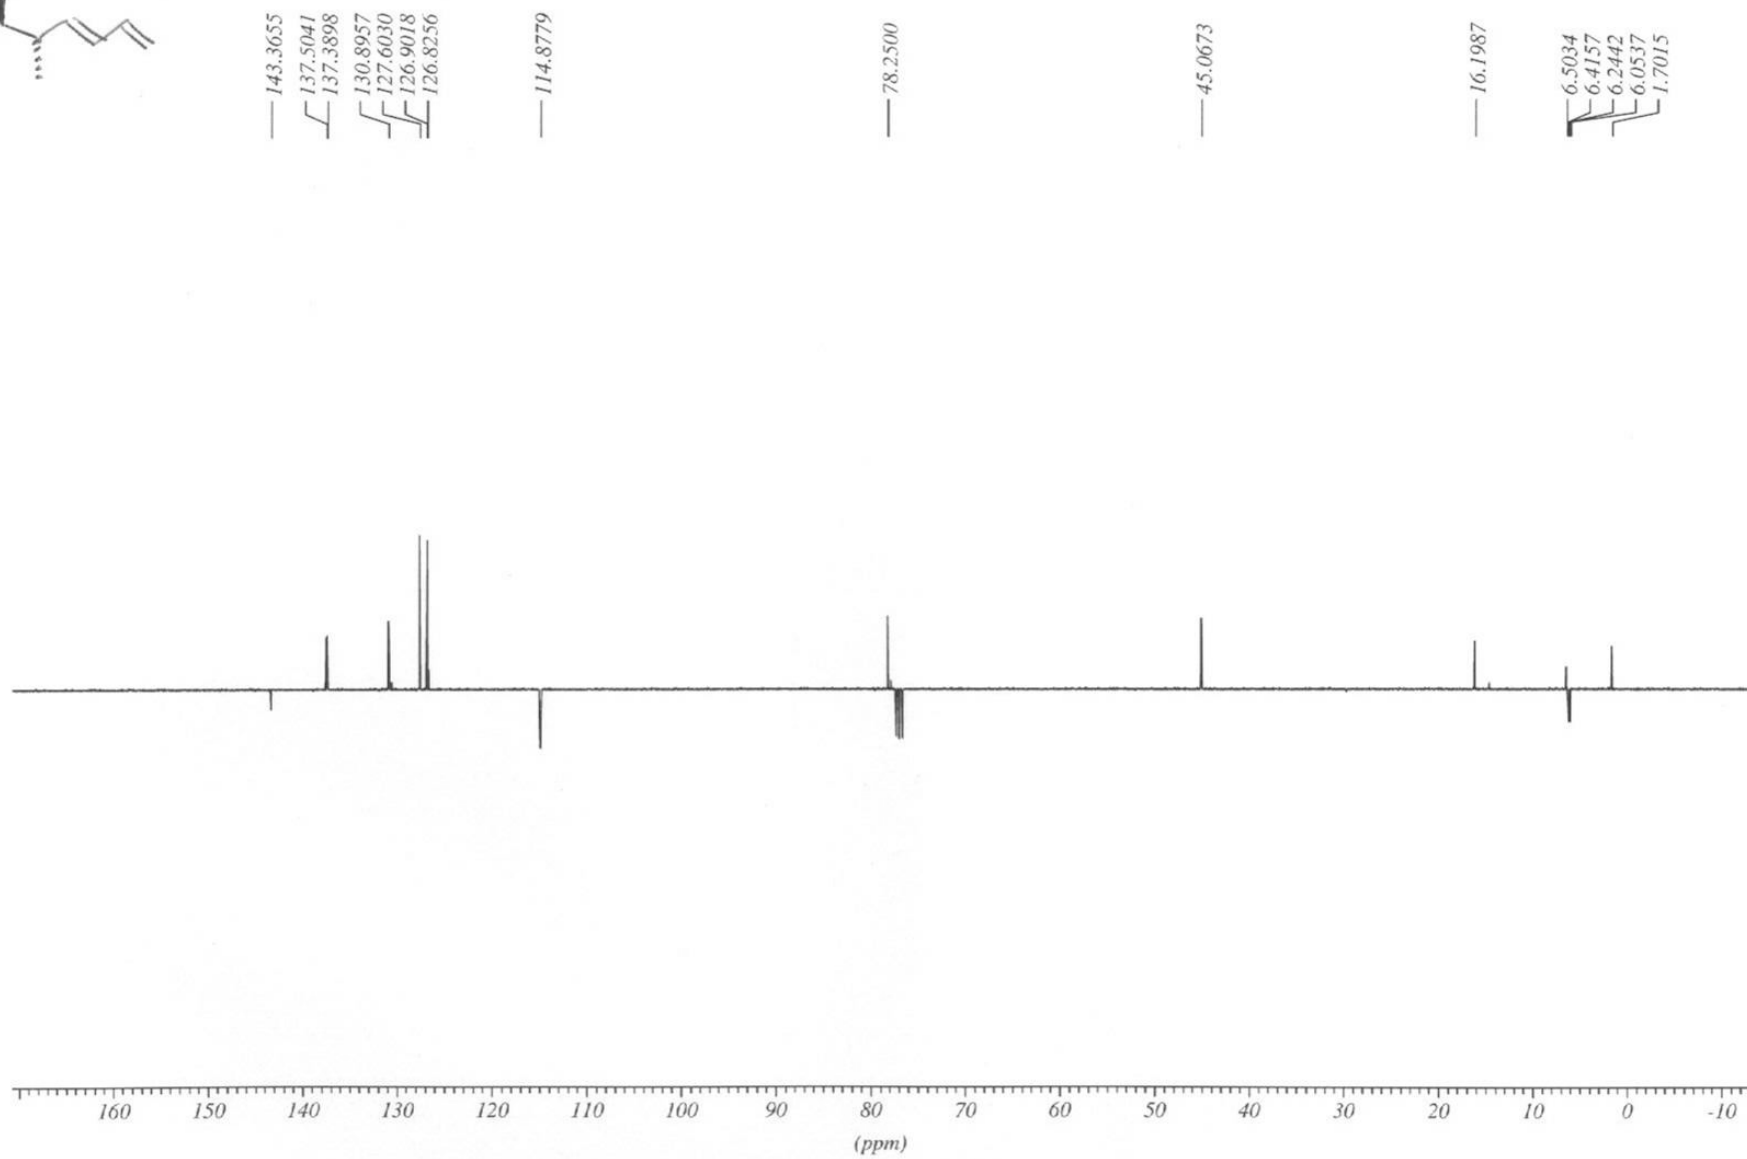

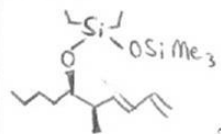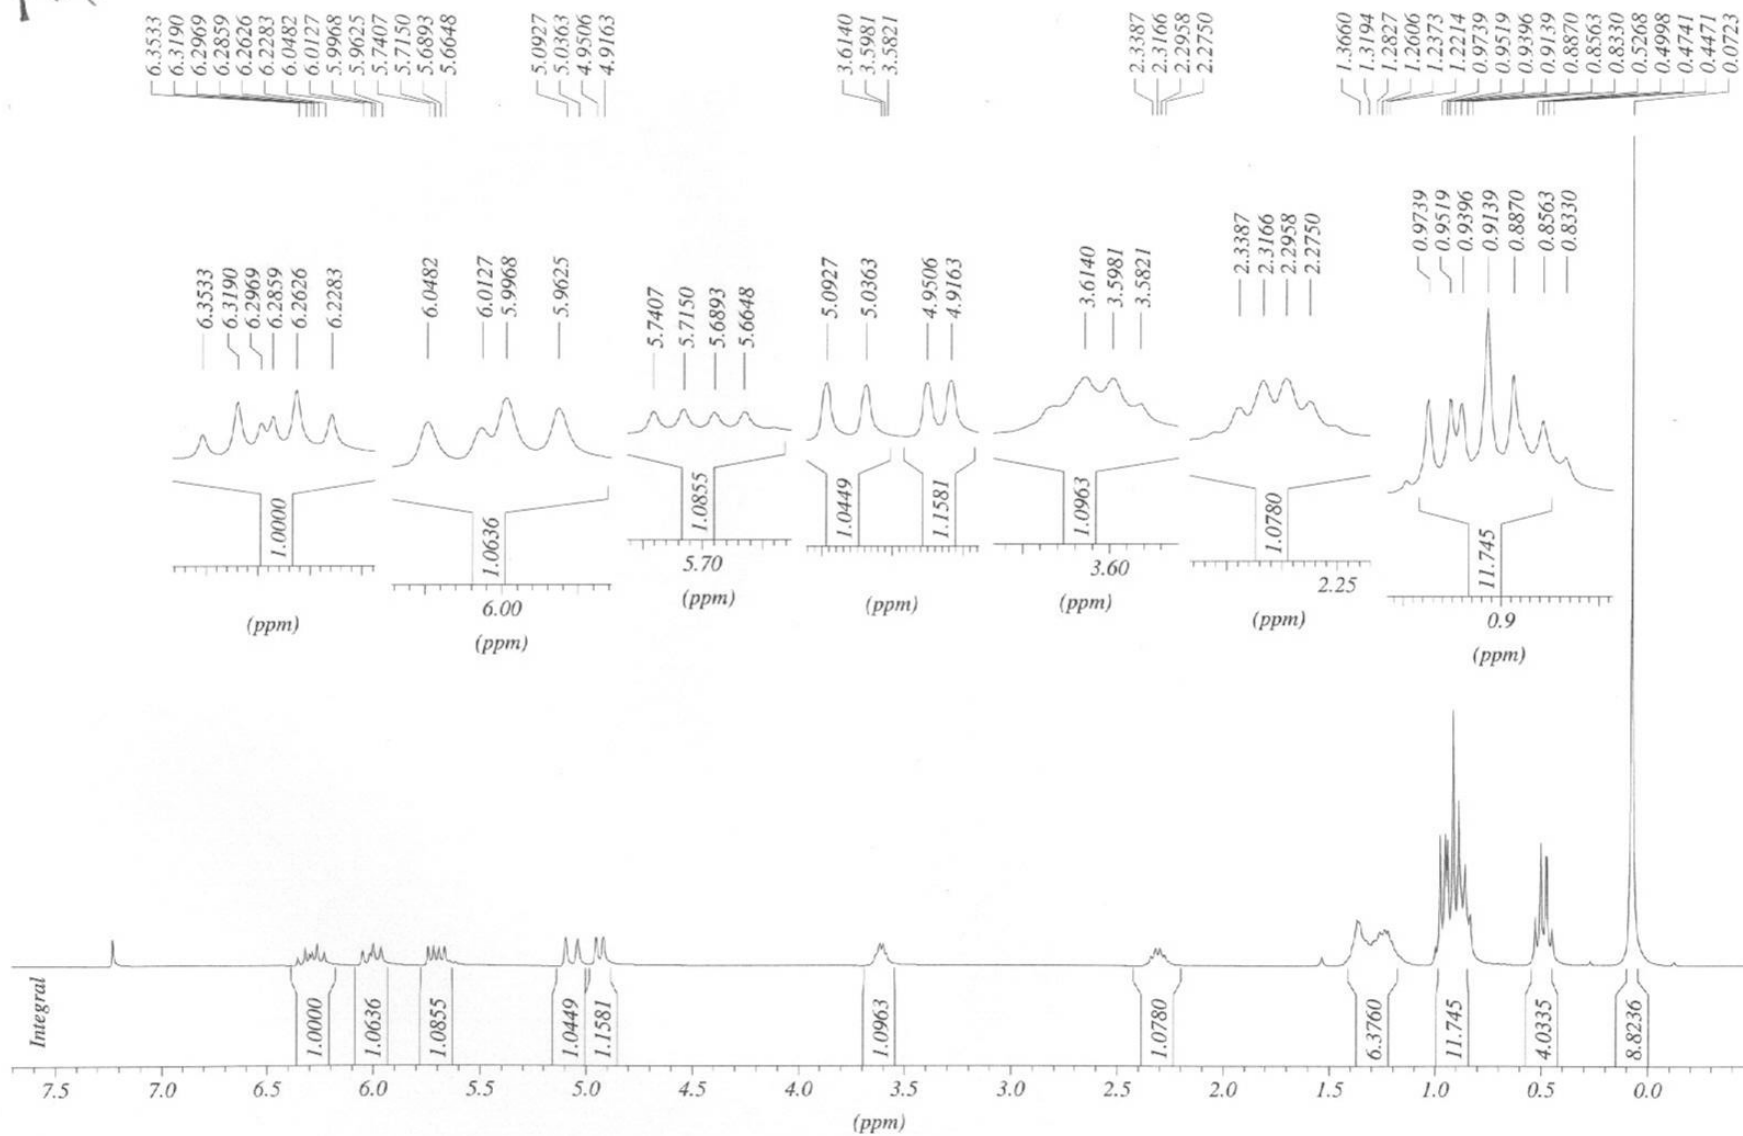

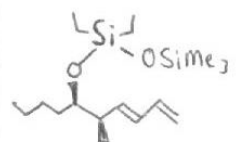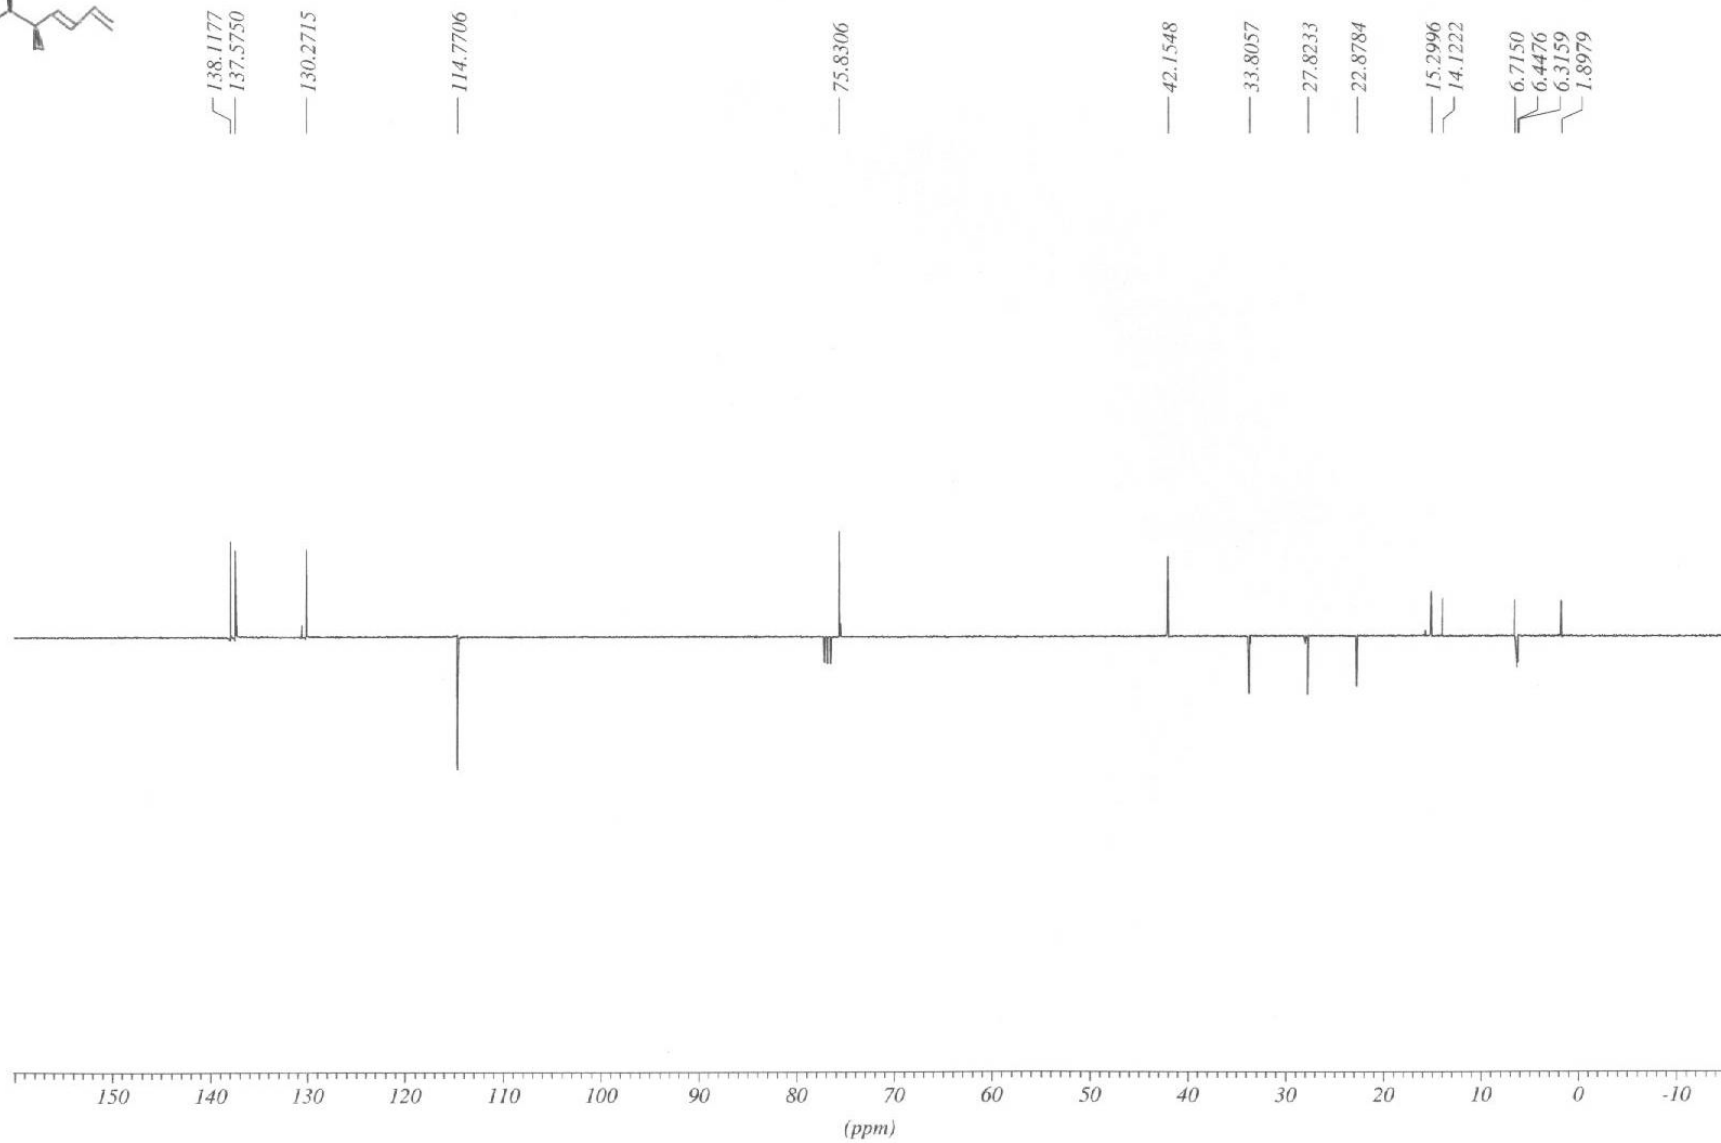

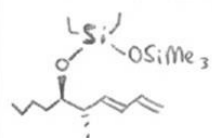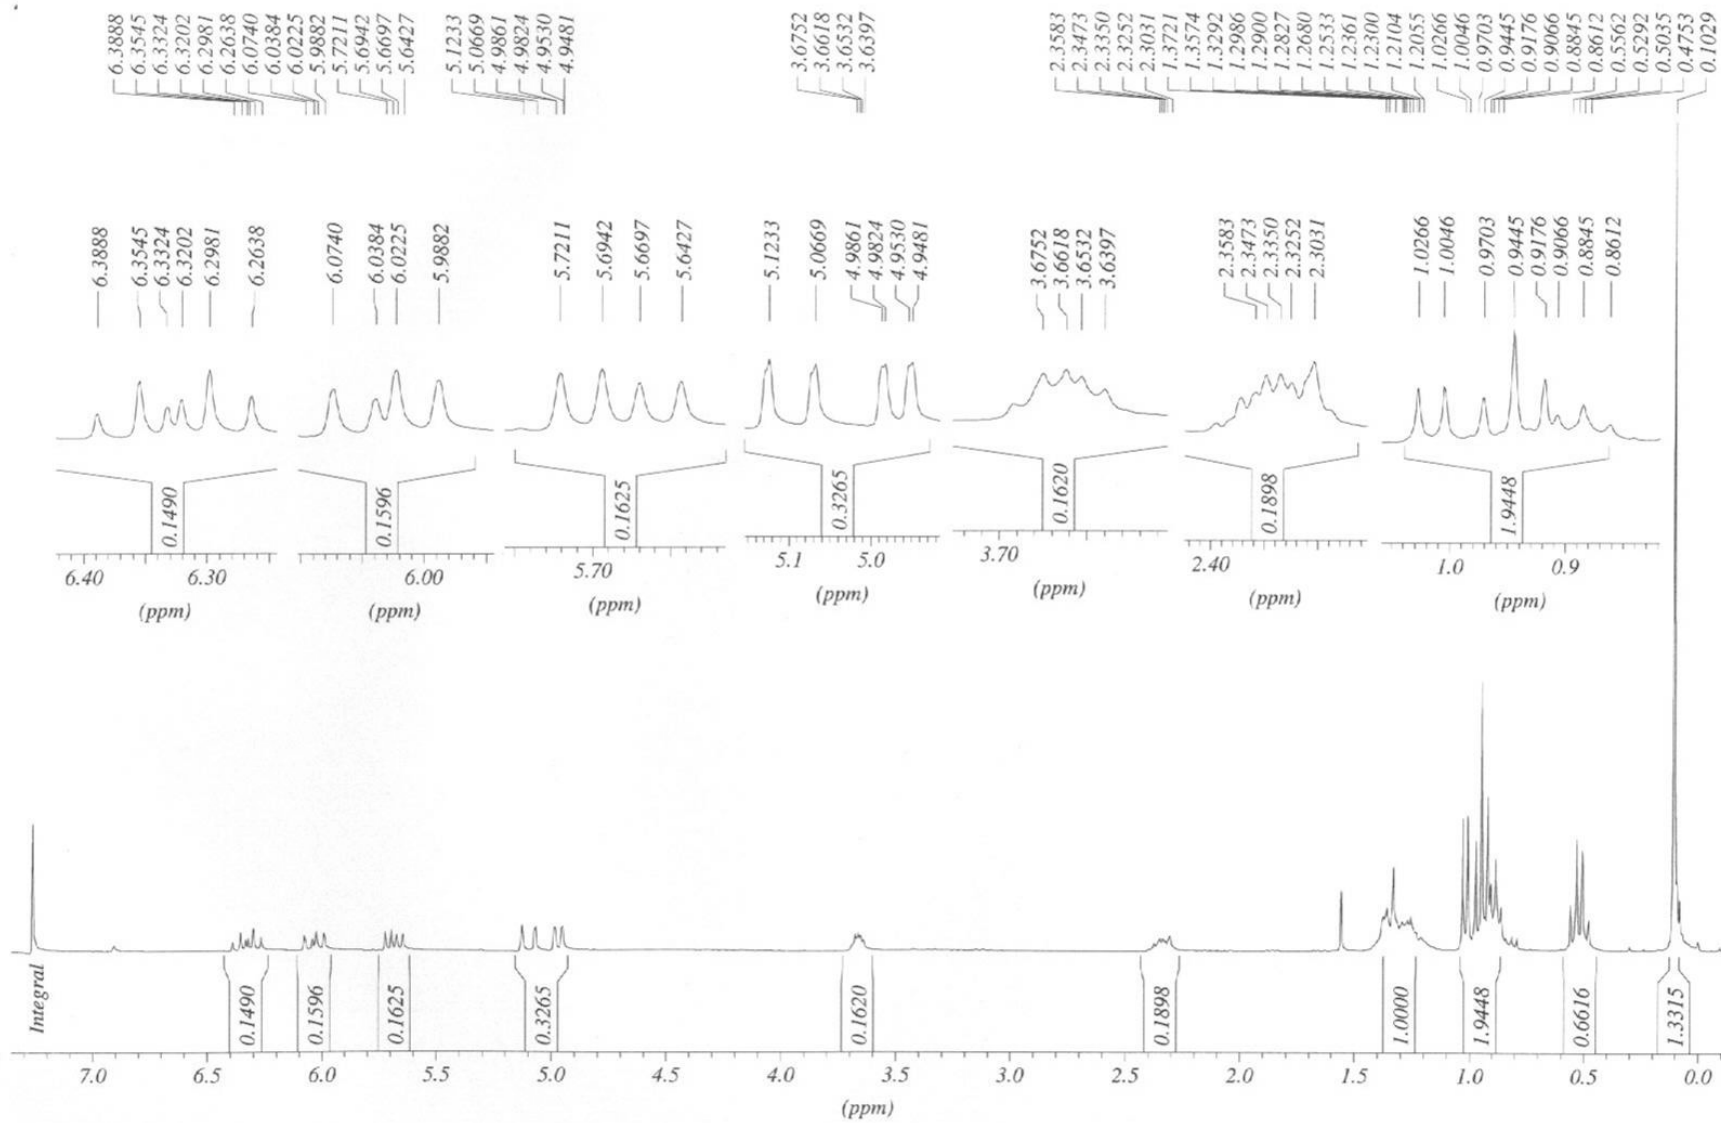

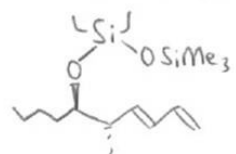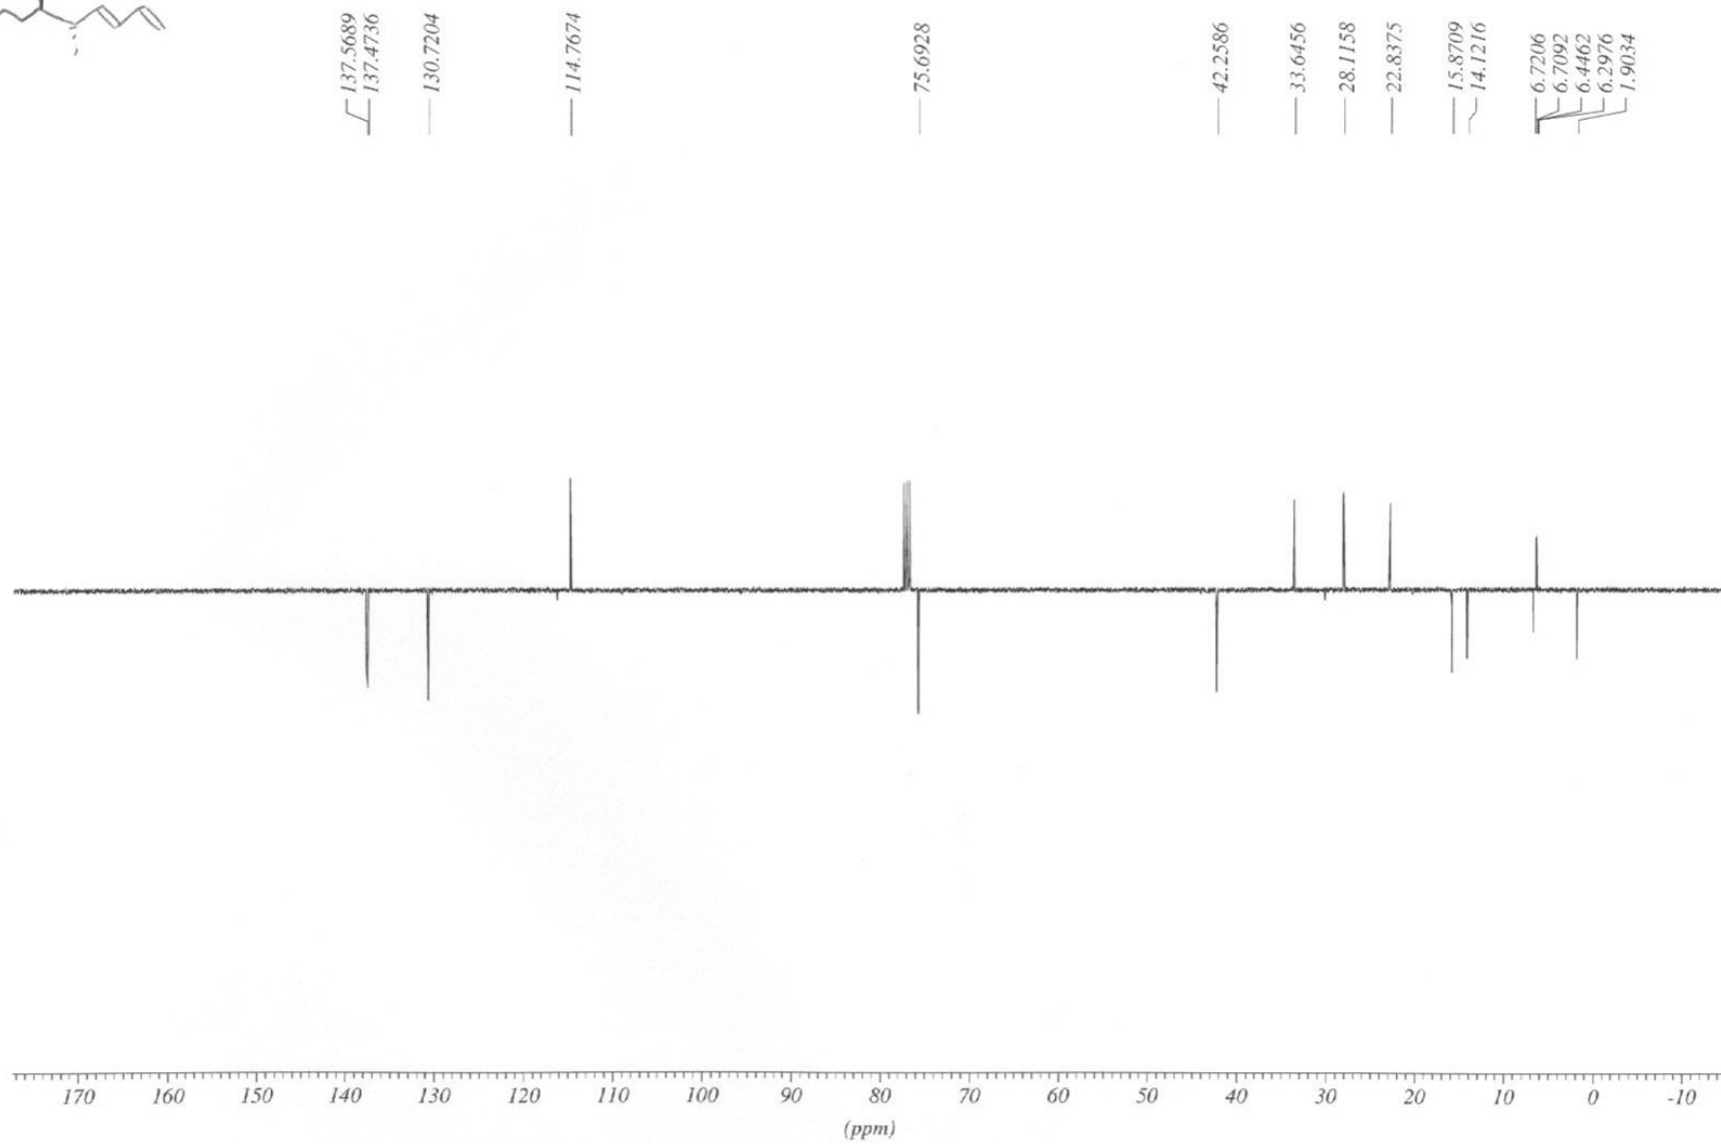

Supplement: Beilstein_J_Org_Chem-03-06-s002.pdf [file Beilstein_J_Org_Chem-03-06-s002.pdf]
