# Supplementary material for: Tether-directed synthesis of highly substituted oxasilacycles via an intramolecular allylation employing allylsilanes
Source: PubMed Central journal article supplement (PMC1810303; doi:10.1186/1860-5397-3-6), 2007-02-08

### Additional File 3

**Tether-directed synthesis of highly substituted oxasilacycles *via* an intramolecular allylation employing allylsilanes**

Peter J. Jervis and Liam R. Cox\*

email: l.r.cox@bham.ac.uk

**<sup>1</sup>H-NMR and <sup>13</sup>C-NMR Spectra for the following compounds:**

**16a, 17a**

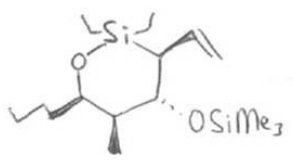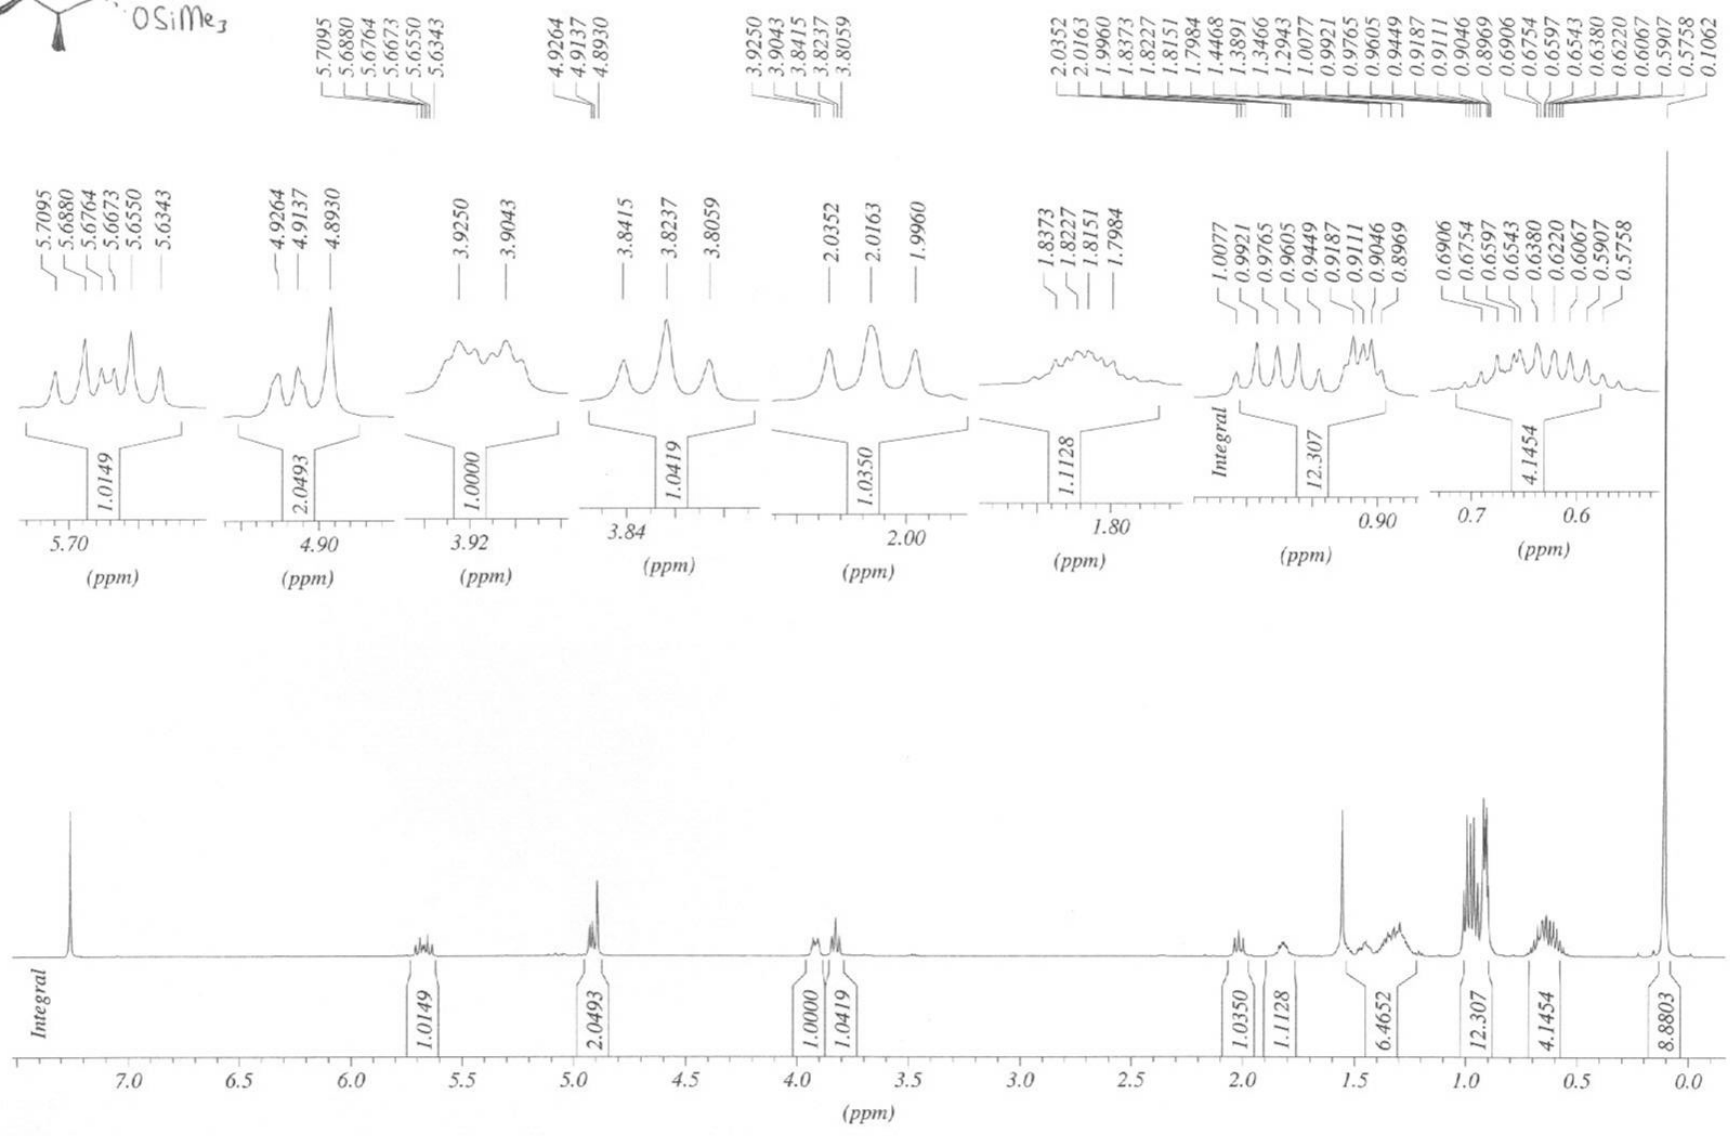

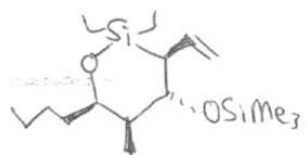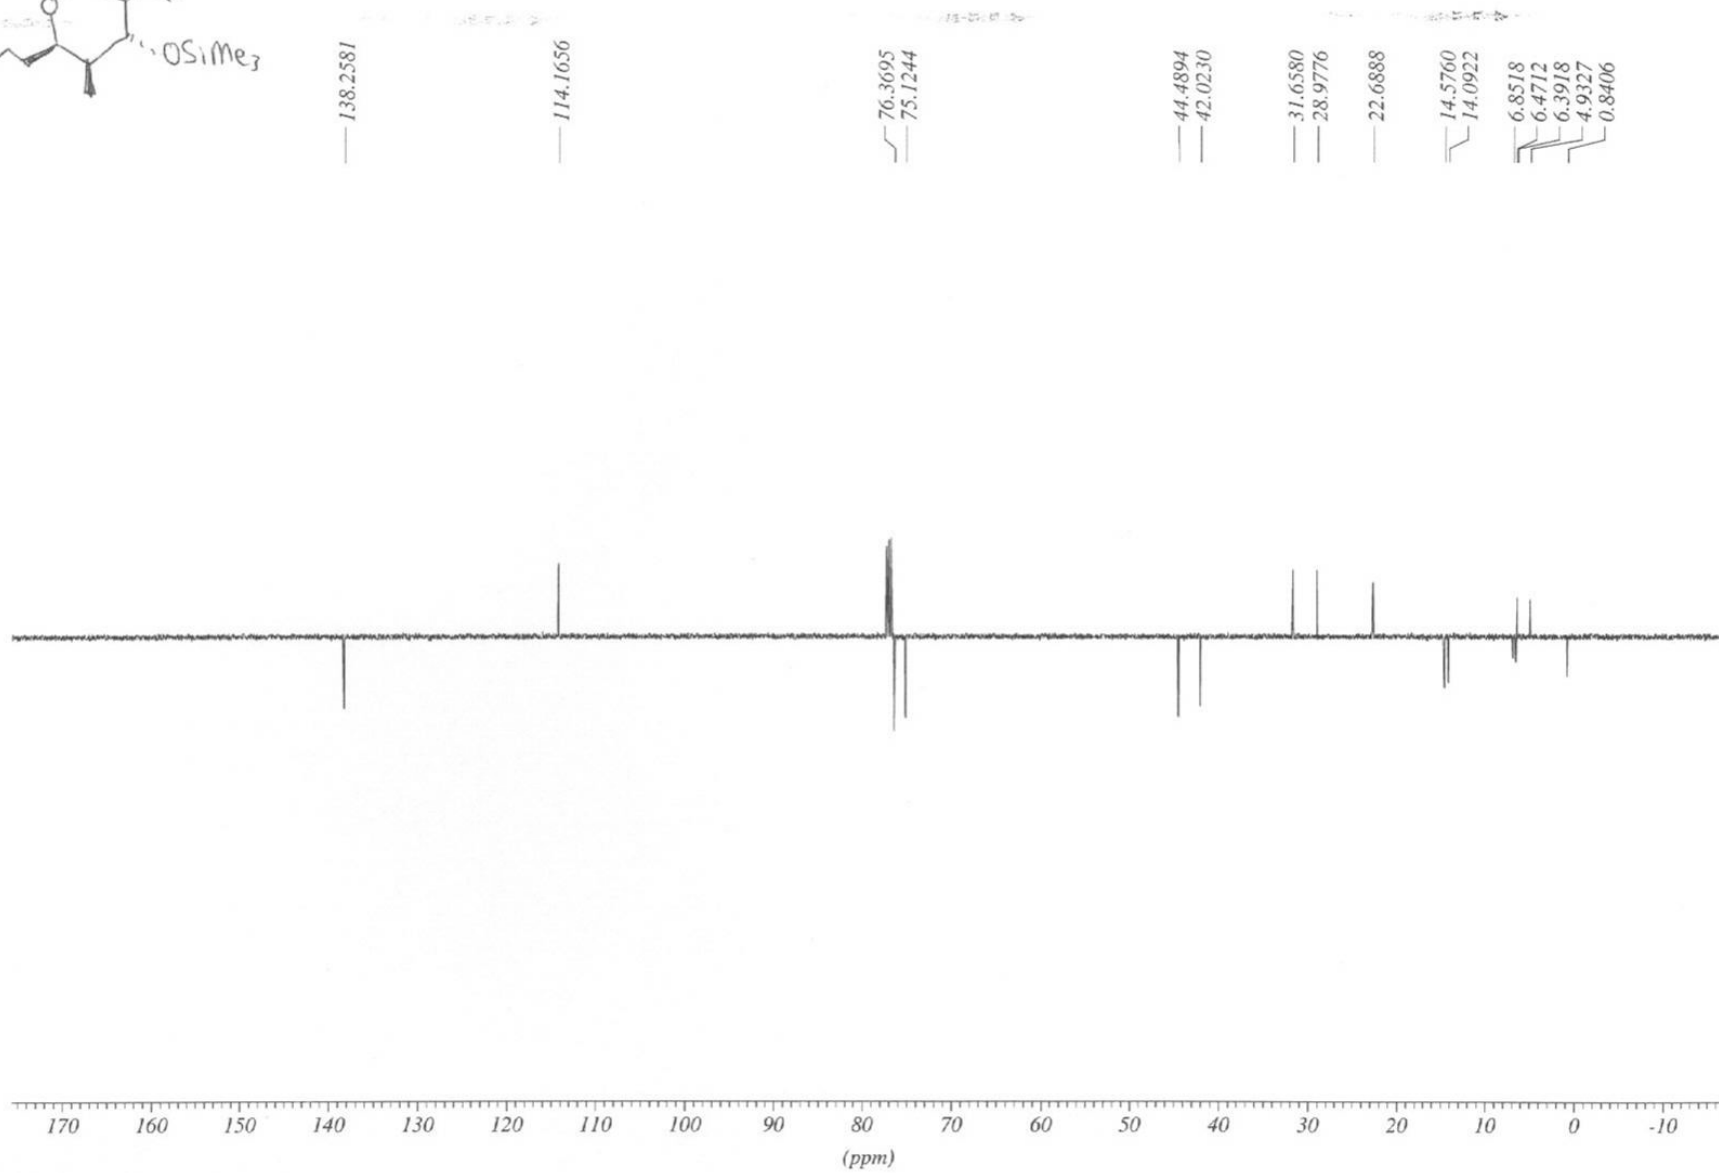

Peter Jervis Sample 2, 08/11/05 in CDCl3 at +27C, set temp  
 drx500, Gradient COSY90

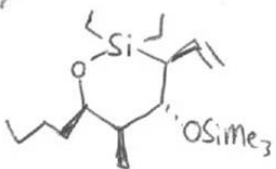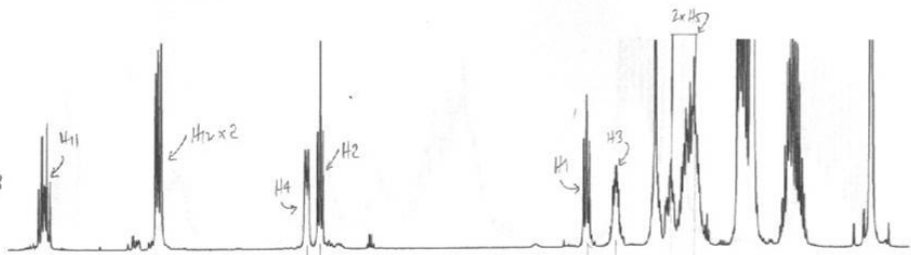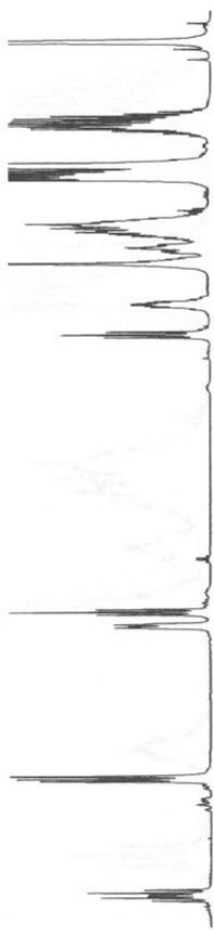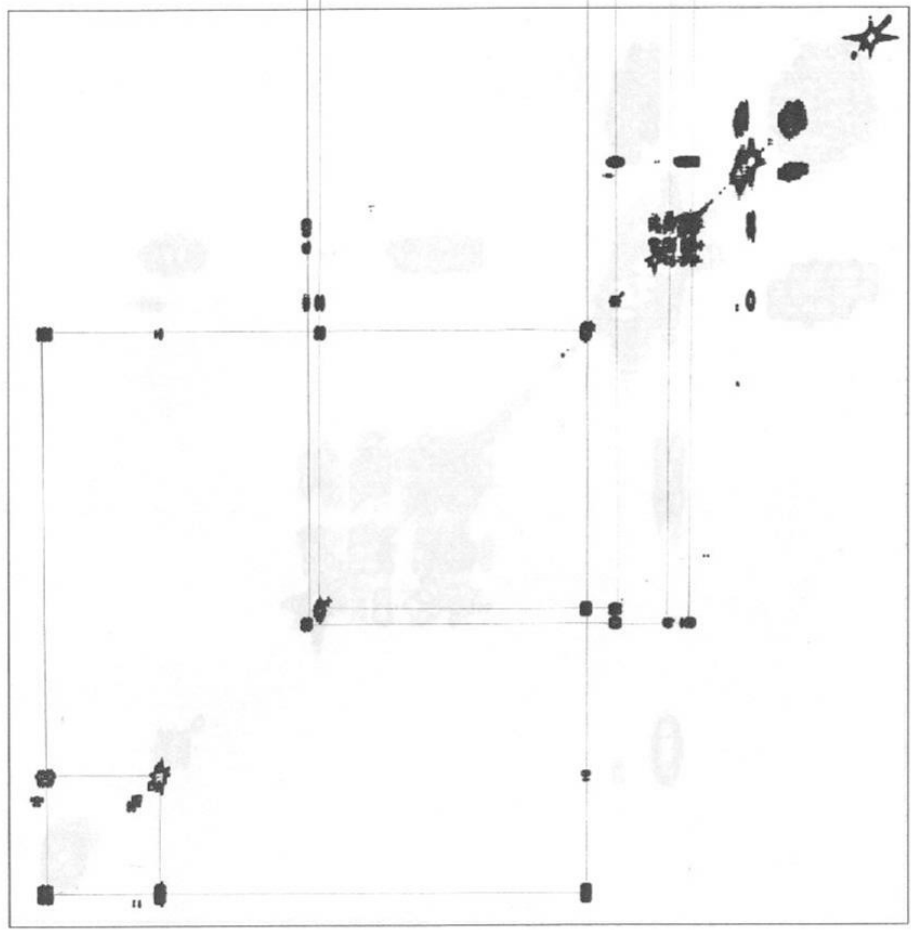

Current Data Parameters  
 NAME nv080j1c  
 EXPNO 4  
 PROCNO 1

F2 - Acquisition Parameters  
 Date\_ 20051106  
 Time 22.47  
 INSTRUM drx500  
 PROBRD 5 mm TBI H/C  
 PULPROG cosygp  
 TD 2048  
 SOLVENT CDCl3  
 NS 8  
 DS 16  
 SWH 4310.346 Hz  
 FIDRES 2.104661 Hz  
 AQ 0.2376180 sec  
 RG 256  
 CW 116.000 usec  
 DE 5.50 usec  
 TE 300.0 K  
 CO 0.0000300 sec  
 CI 2.0000000 sec  
 C13 0.0000300 sec  
 D16 0.0010000 sec  
 INO 0.0023200 sec

----- CHANNEL f1 -----  
 MUC1 1H  
 PO 10.70 usec  
 P1 10.70 usec  
 PL1 1.00 dB  
 SFO1 500.1318657 MHz

----- GRADIENT CHANNEL -----  
 GRAM1 SINE.100  
 GRAM2 SINE.100  
 GPX1 0.00 %  
 GPX2 0.00 %  
 GPY1 0.00 %  
 GPY2 0.00 %  
 GPZ1 10.00 %  
 GPZ2 10.00 %  
 P16 1000.00 usec

F1 - Acquisition parameters  
 NDO 1  
 TD 512  
 SFO1 500.1319 MHz  
 FIDRES 8.418642 Hz  
 SW 8.618 ppm

F2 - Processing parameters  
 SI 2048  
 SF 500.1300233 MHz  
 WDM SINE  
 SSB 0  
 LB 0.00 Hz  
 GB 0  
 PC 1.00

F1 - Processing parameters  
 SI 1024  
 SF 500.1300233 MHz  
 WDM SINE  
 SSB 0  
 LB 0.00 Hz  
 GB 0

2D NMR plot parameters  
 CX2 20.00 cm  
 CX1 20.00 cm  
 F2PLD 5.906 ppm  
 F2LD 2953.67 Hz  
 F2PHI -0.162 ppm  
 F2HI -81.25 Hz  
 F1PLD 5.872 ppm  
 F1LD 2936.84 Hz  
 F1PHI -0.104 ppm  
 F1HI -51.78 Hz  
 F2PPMCH 0.30341 ppm/cm  
 F2HZCH 151.74603 Hz/cm  
 F1PPMCH 0.29878 ppm/cm  
 F1HZCH 149.43089 Hz/cm

sample 2, 08/11/05 in CDCl3 at +27C, set temp  
gradient COSY90

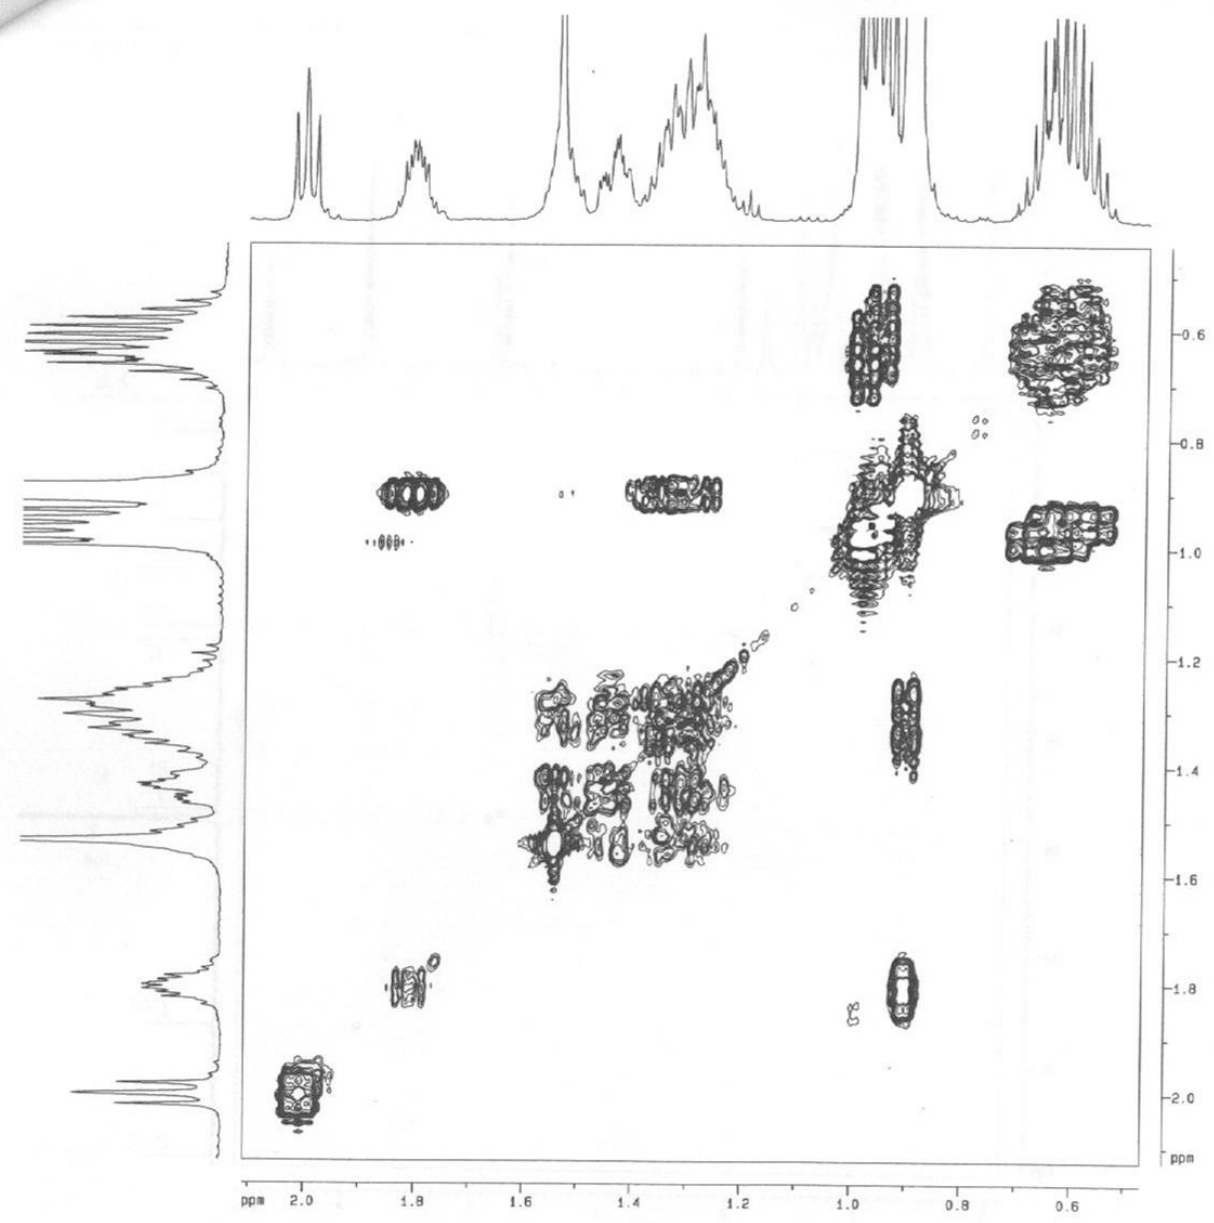

Peter Jarvis Sample 2, 08/11/05 in CDCl3 at +27C, set temp  
dix500, Gradient HSGC

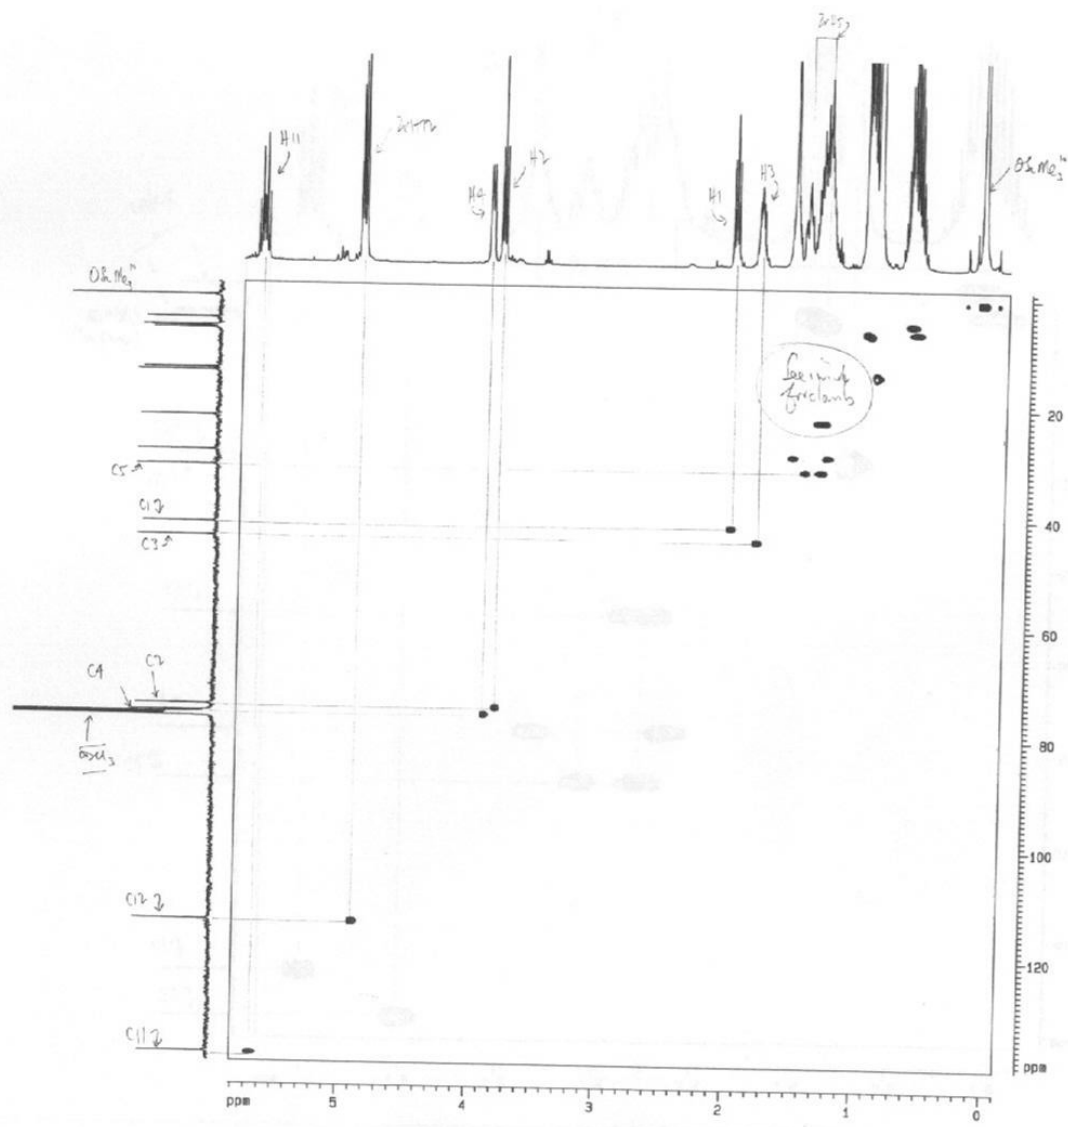

```

Current Data Parameters
NAME      mv080110
EXPNO    2
PROCNO   1

F2 - Acquisition Parameters
Date_    20051108
Time     17.31
INSTRUM  draco
PROBHD   5 mm TBI H/C
PULPROG  invgptp
TD       2048
SOLVENT  CDCl3
NS       8
DS       16
SWH      4310.348 Hz
FIDRES   2.104961 Hz
AQ       0.2376180 sec
RG       32768
DW       116.000 usec
DE       5.50 usec
TE       300.0 K
CHFTZ    148.0000000
d0       0.0000300 sec
d1       2.0000000 sec
d4       0.00172414 sec
d11      0.3300000 sec
d13      0.0800000 sec
d16      0.0001000 sec
d20      0.0011000 sec
d21      0.00091714 sec
d26      0.0003140 sec

----- CHANNEL f1 -----
NUC1     1H
P1       10.70 usec
P2       21.40 usec
PL1      1.00 dB
PL2      1.00 dB
SFO1     500.1318887 MHz

----- CHANNEL f2 -----
CPROG2   gptp
NUC2     13C
P3       12.00 usec
P4       24.00 usec
PL12     -1.00 dB
PL12     15.00 dB
SFO2     125.7677693 MHz

----- GRADIENT CHANNEL -----
GPMAX1   SINE 100
GPMAX2   SINE 100
GPMAX3   SINE 100
GPA1     0.00 %
GPA2     0.00 %
GPA3     0.00 %
GPA4     0.00 %
GPA5     0.00 %
GPA6     0.00 %
GPA7     0.00 %
GPA8     0.00 %
GPA9     0.00 %
GPA10    0.00 %
GPA11    0.00 %
GPA12    0.00 %
GPA13    0.00 %
GPA14    0.00 %
GPA15    0.00 %
GPA16    0.00 %
GPA17    0.00 %
GPA18    0.00 %

F1 - Acquisition parameters
ND0      4
TD       65536
SFO1     125.767808 MHz
FIDRES   42.831698 Hz
SFO2     500.1318887 MHz

F2 - Processing parameters
SI       2048
SF       500.1300238 MHz
WDW      GBINE
SSB      2
LB       0.00 Hz
GB       0
PC       1.00

F1 - Processing parameters
SI       16384
MC2      TPPI
SF       125.7577210 MHz
WDW      GBINE
SSB      2
LB       0.00 Hz
GB       0

2D NMR plot parameters
CQ2      17.00 cm
CXL      17.00 cm
F2PLD    0.513 ppm
F2LQ     2507.37 Hz
F2PHE   -0.104 ppm
F2HE    -51.78 Hz
F1PLD    130.841 ppm
F1LQ     17888.08 Hz
F1PHE   -1.503 ppm
F1HE    0.34000 ppm/cm
F2PHECH 174.08781 Hz/cm
F1PHECH  0.31437 ppm/cm
F1HECH  16.8440000 Hz/cm
  
```

Peter Jarvis Sample 2. 08/11/05 in CDCl3 at +27C, set temp  
drx500, Gradient HSGC

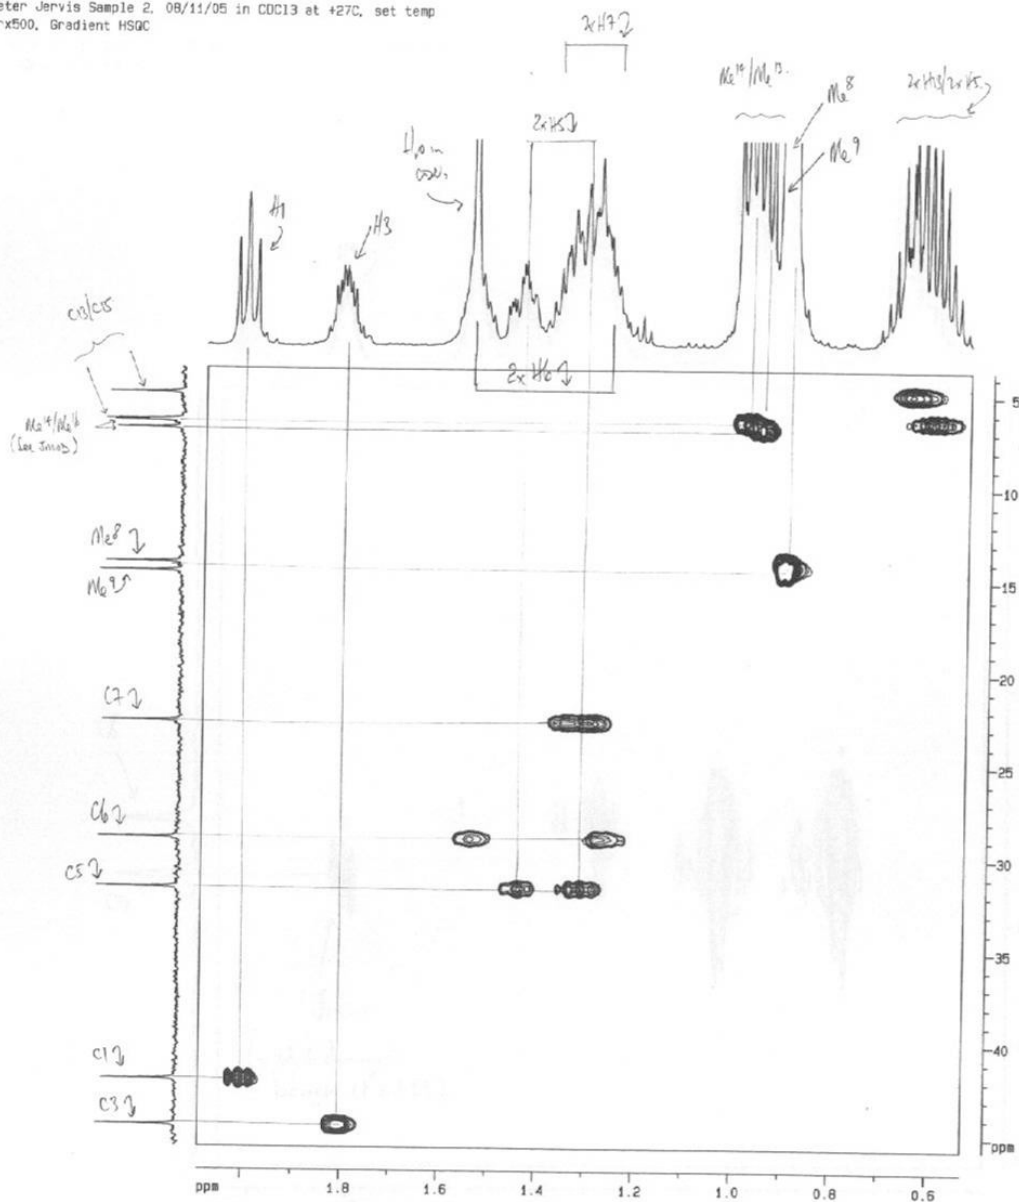

Peter Jervis Sample 2, 06/11/05 in CDCl3 at +27C, set temp drx500, Gradient HMBC

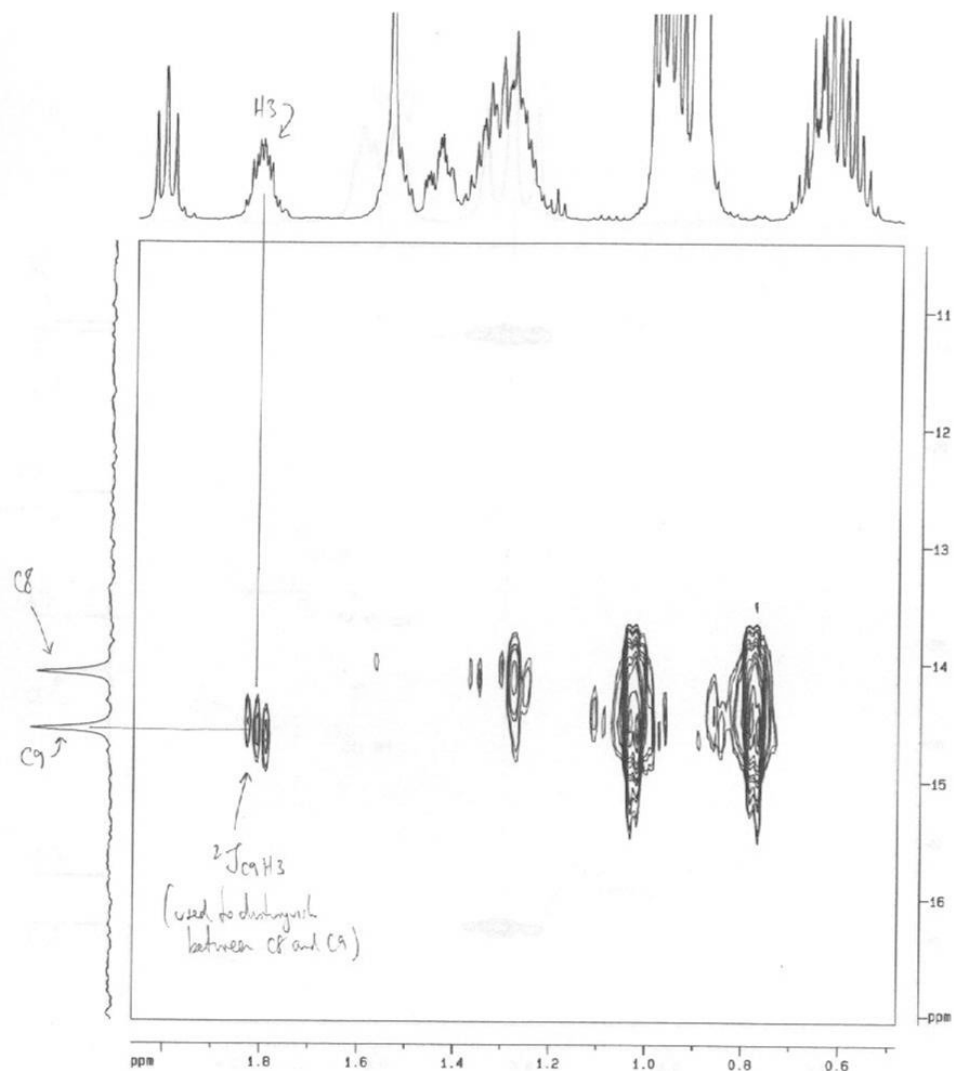

```

Current Data Parameters
NAME      nv08b1id
EXPNO    3
PROCNO   1

F2 - Acquisition Parameters
Data_    20051108
Time     20.05
INSTRUM  dr-500
PROBHD   5 mm TBI H/C
PULPROG  invgpt1e2nd
TD       2048
SOLVENT  CDCl3
NS       8
DS       16
SWH      4310.345 Hz
FIDRES   2.104651 Hz
AQ       0.2576180 sec
RG       32768
DM       119.000 usec
DE       5.50 usec
TE       300.0 K
CSTG2    160.0000000
d0       0.00000300 sec
d1       2.00000000 sec
d2       0.00312500 sec
d3       0.10000000 sec
d4       0.00000300 sec
d5       0.00010000 sec
d6       0.00022500 sec

----- CHANNEL f1 -----
NUC1     1H
P1       10.70 usec
p2       21.40 usec
PL1      1.00 dB
SFO1     500.1318067 MHz

----- CHANNEL f2 -----
NUC2     13C
P3       12.00 usec
PL2      -1.00 dB
SFO2     125.7677893 MHz

----- GRADIENT CHANNEL -----
GPNAM1   SINE.100
GPNAM2   SINE.100
GPNAM3   SINE.100
BPK1     0.00 %
BPK2     0.00 %
BPK3     0.00 %
BPY1     0.00 %
BPY2     0.00 %
BPY3     0.00 %
BPZ1     50.00 %
BPZ2     30.00 %
BPZ3     45.10 %
P16      1000.00 usec

F1 - Acquisition parameters
ND0      2
TD       8192
SFO1     125.7668 MHz
FIDRES   42.831698 Hz
SM       174.399 ppm

F2 - Processing parameters
SI       2048
SF       500.1300233 MHz
MCW      GSINE
SBS      2
LB       0.00 Hz
GB       0
PC       0.20

F1 - Processing parameters
SI       1024
MC2      OF
SF       125.7577910 MHz
MCW      GSINE
SBS      2
LB       0.00 Hz
GB       0

2D NMR plot parameters
CZ2      17.00 cm
CX1      17.00 cm
F0PLD    2.064 ppm
F2LD     1032.12 Hz
F2PH0    0.481 ppm
F2PH1    240.77 Hz
F1PLD    17.059 ppm
F1LD     2145.25 Hz
F1PH1    10.417 ppm
F1PH2    1310.04 Hz
F2PPHCH  0.03998 ppm/cm
F2PHCH   45.50014 Hz/cm
F1PPHCH  0.33668 ppm/cm
F1PHCH   40.13047 Hz/cm

```



Peter Jervis Sample 2, 06/11/05 in CDCl3 at +27C, set temp  
drx500, Gradient HMBC

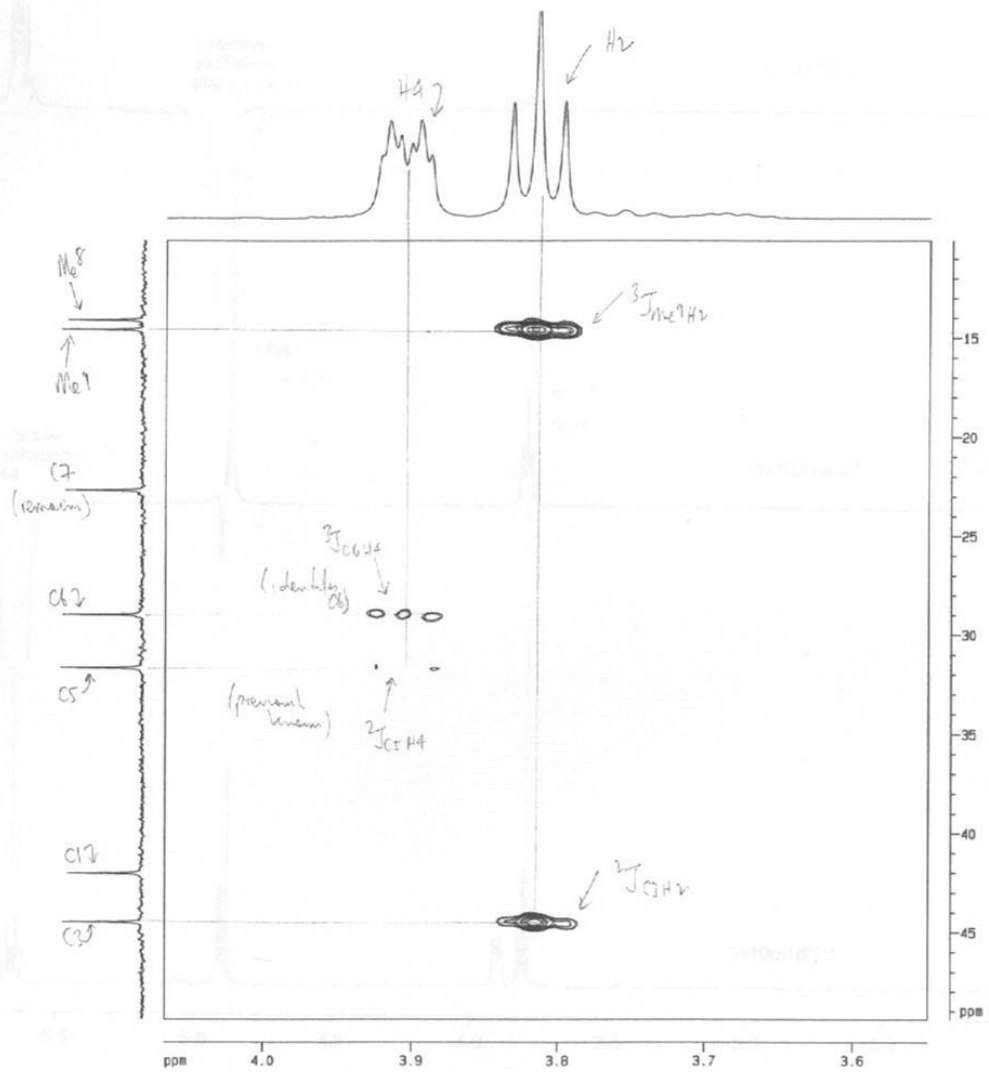

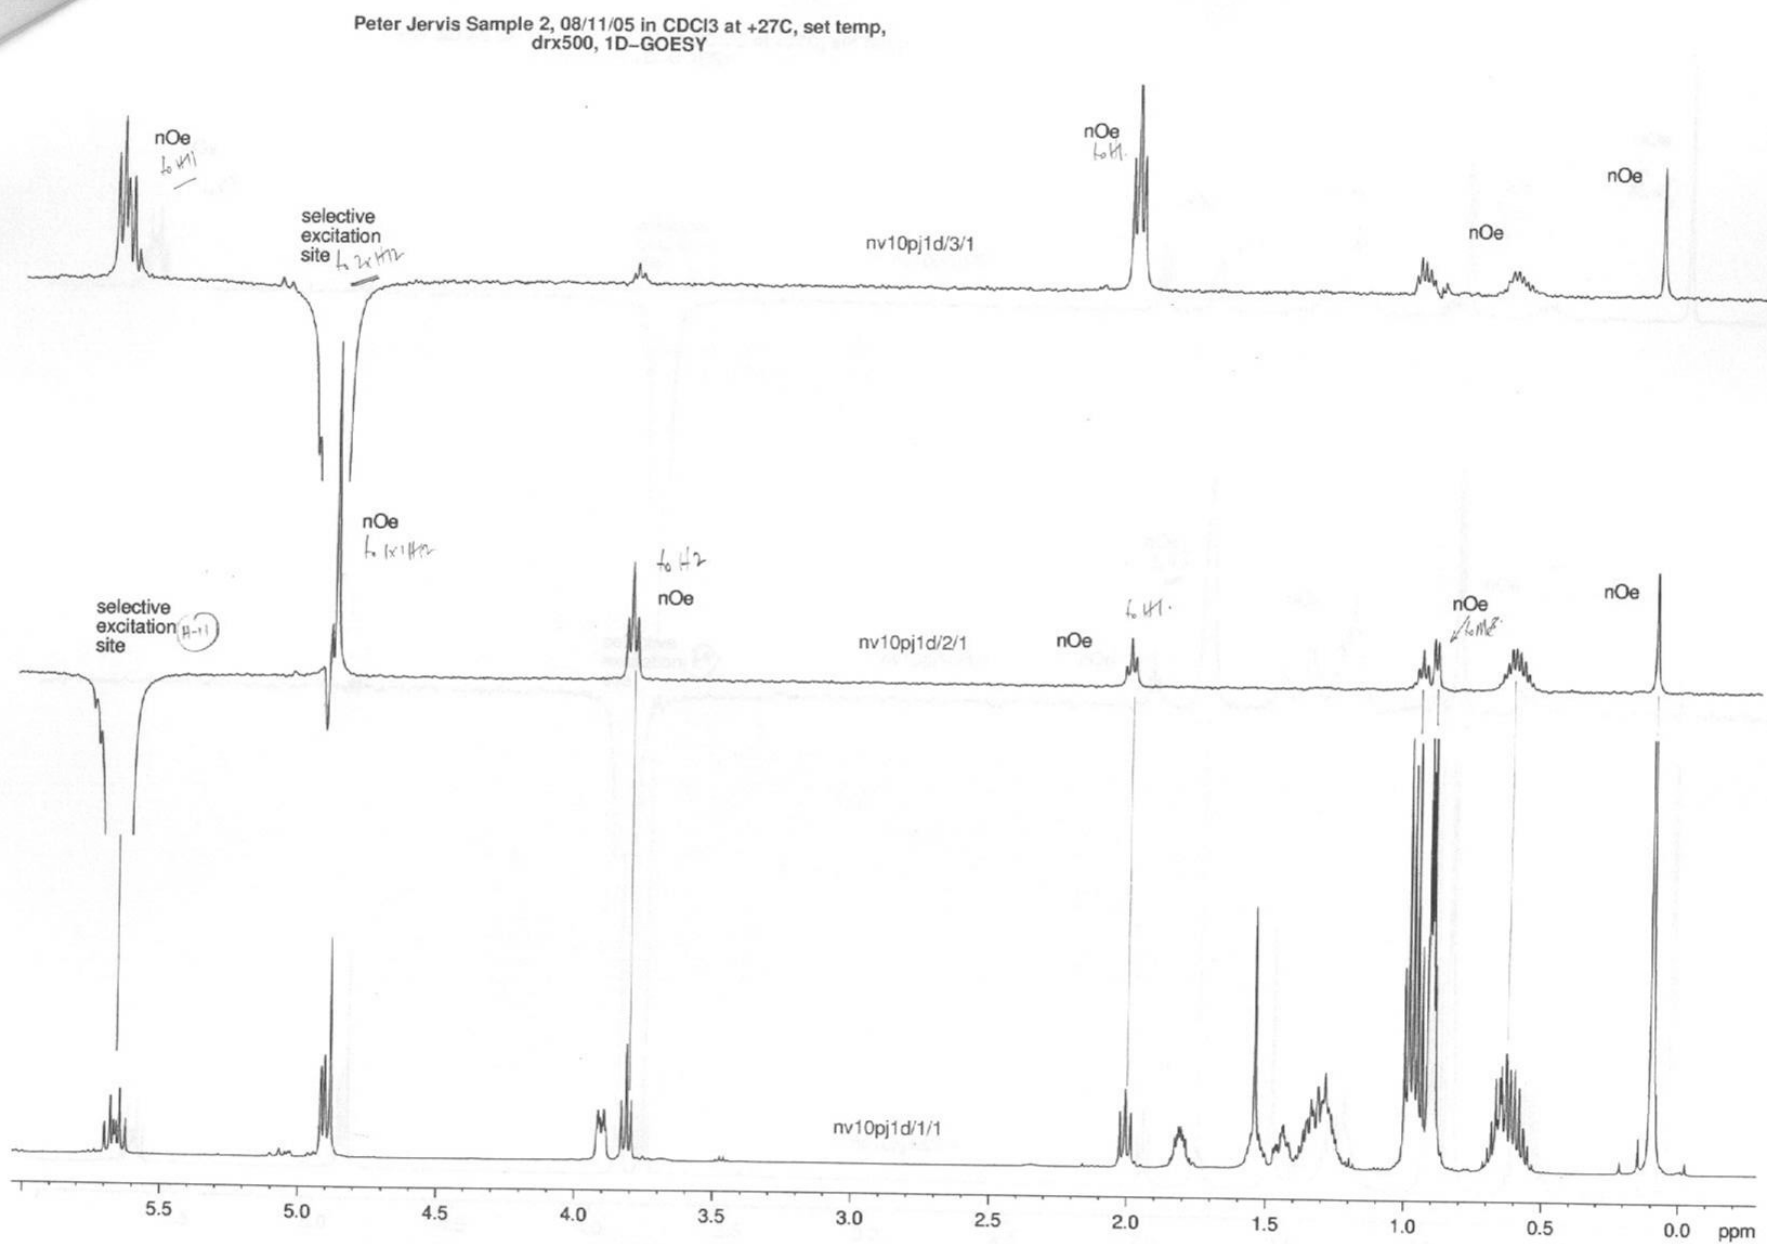

Peter Jervis Sample 2, 08/11/05 in CDCl3 at +27C, set temp,  
drx500, 1D-GOESY

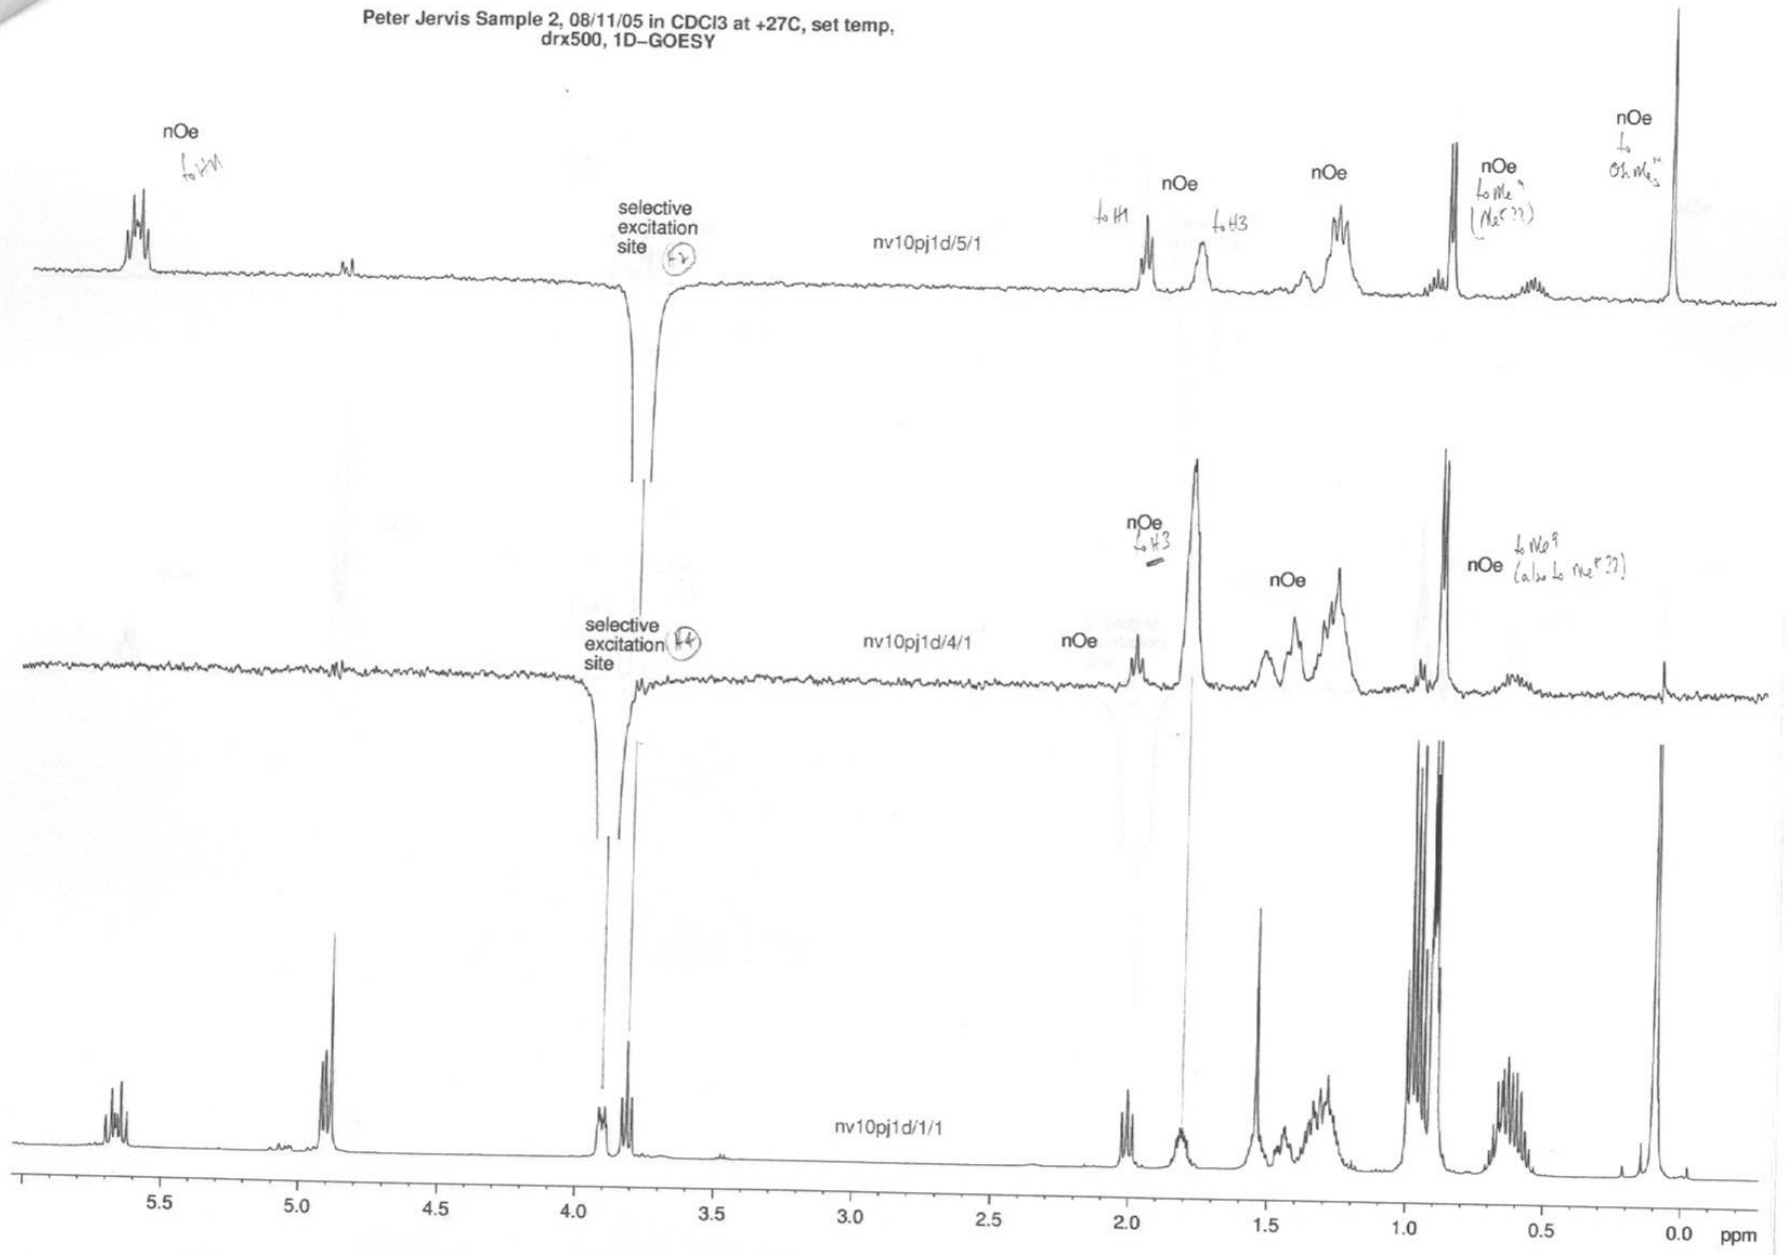

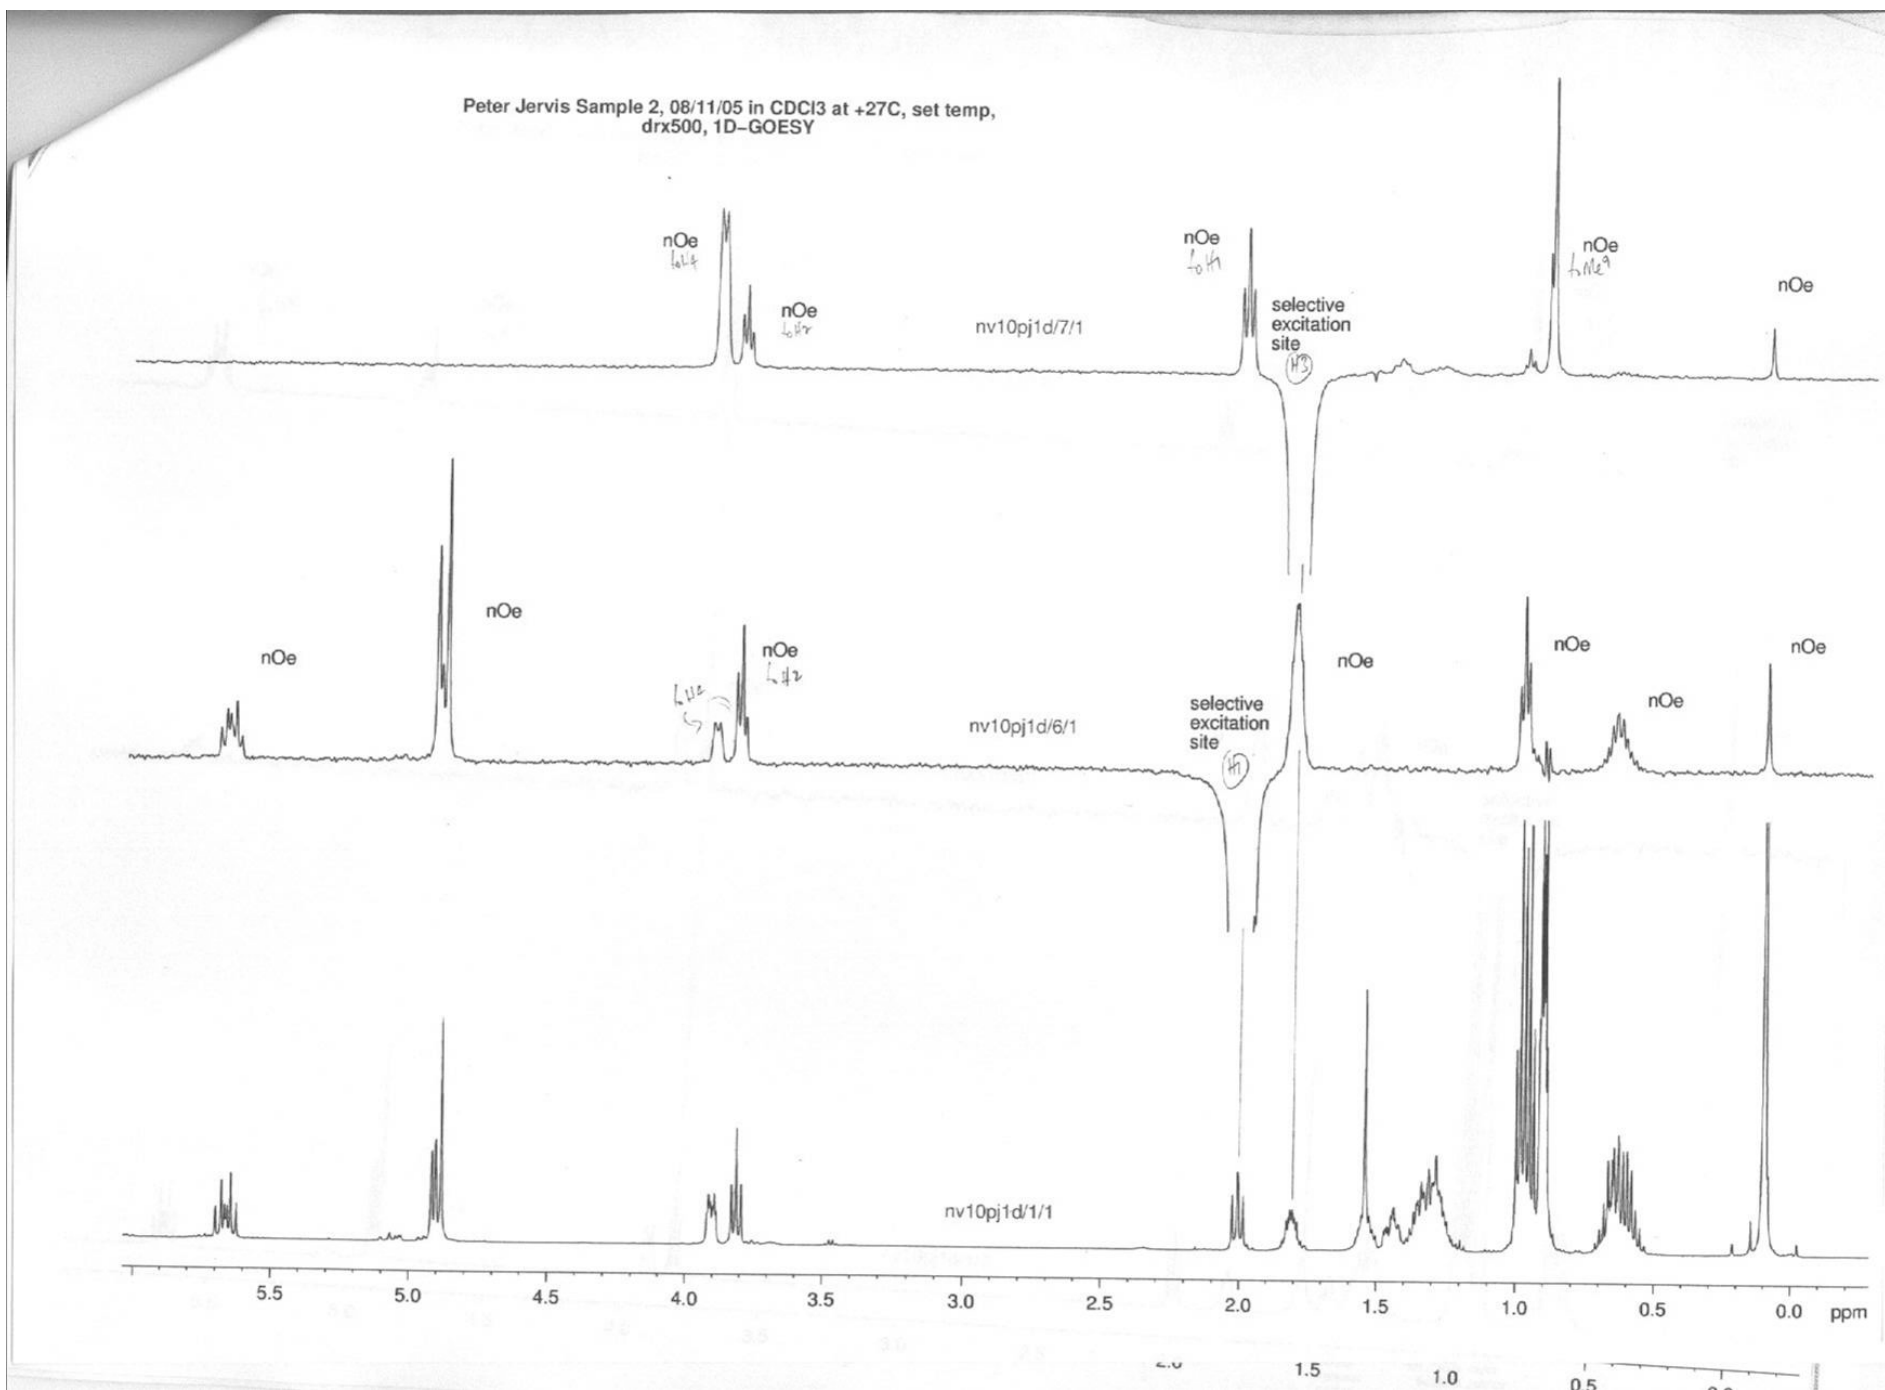



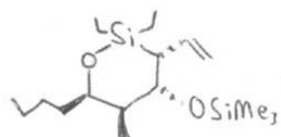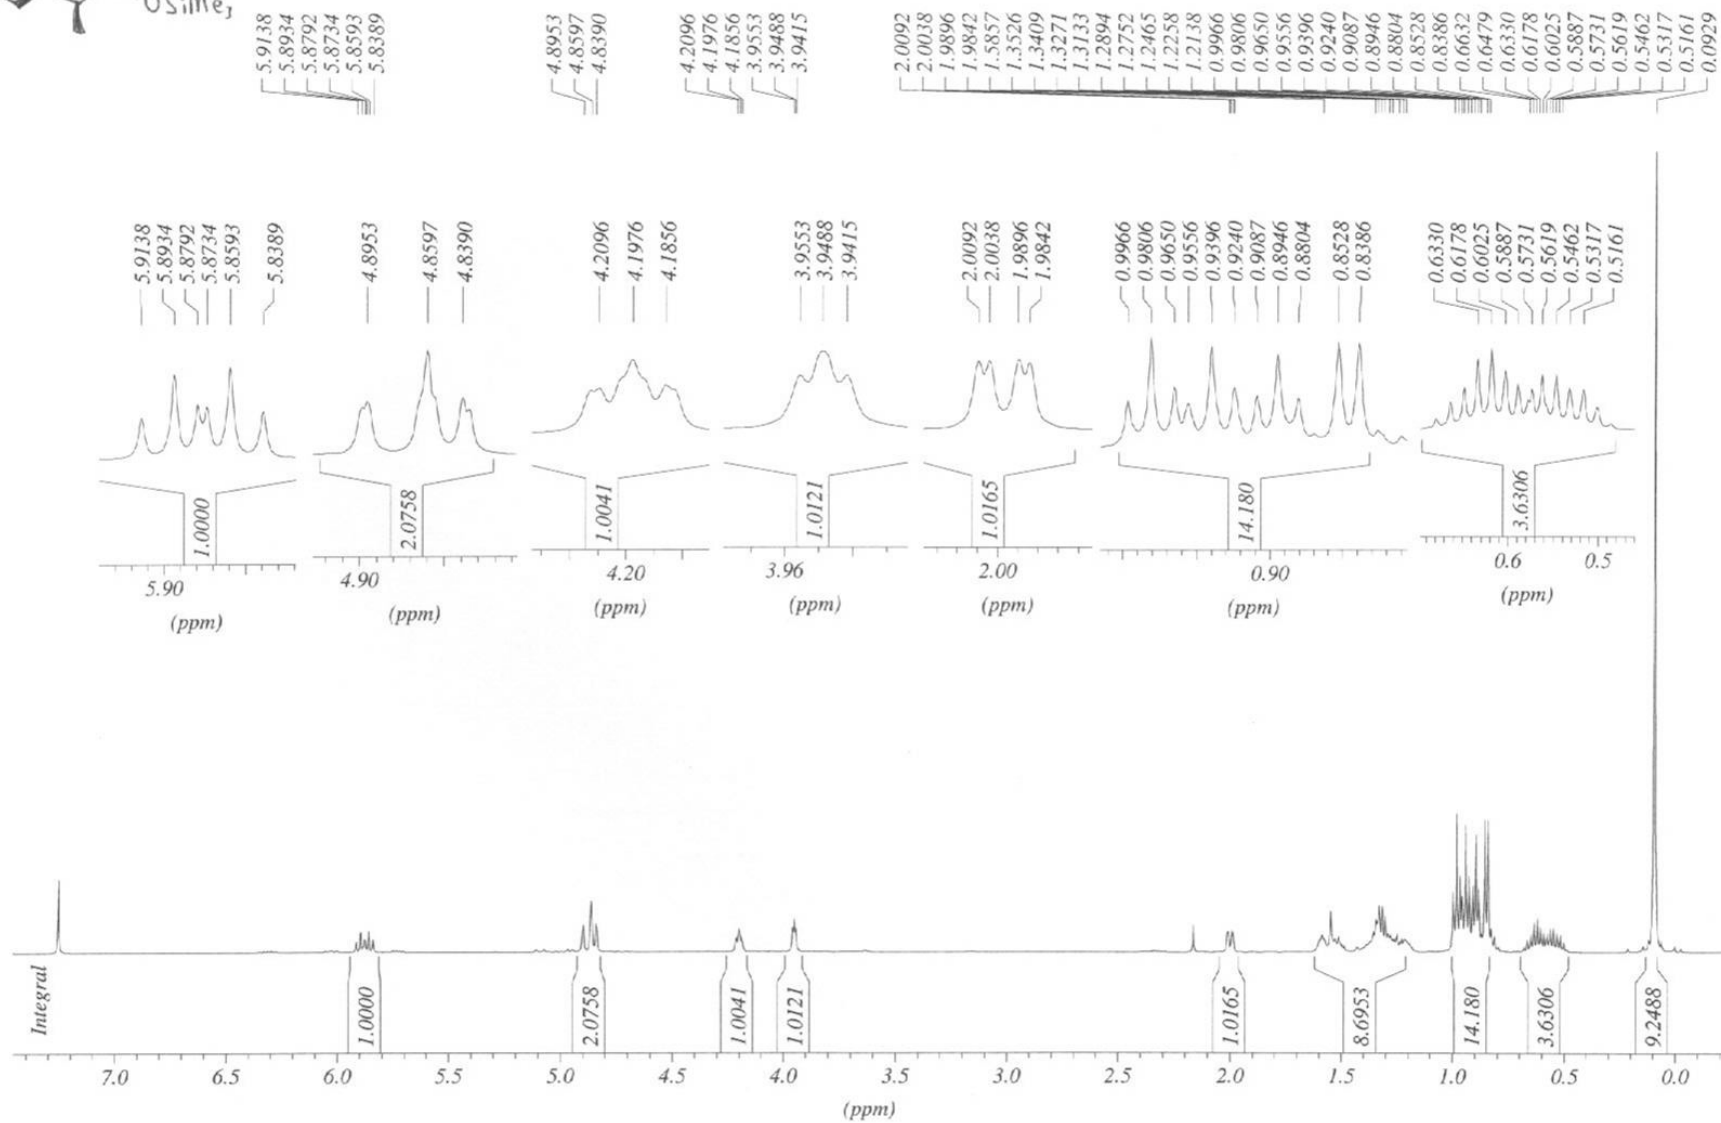

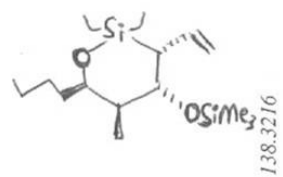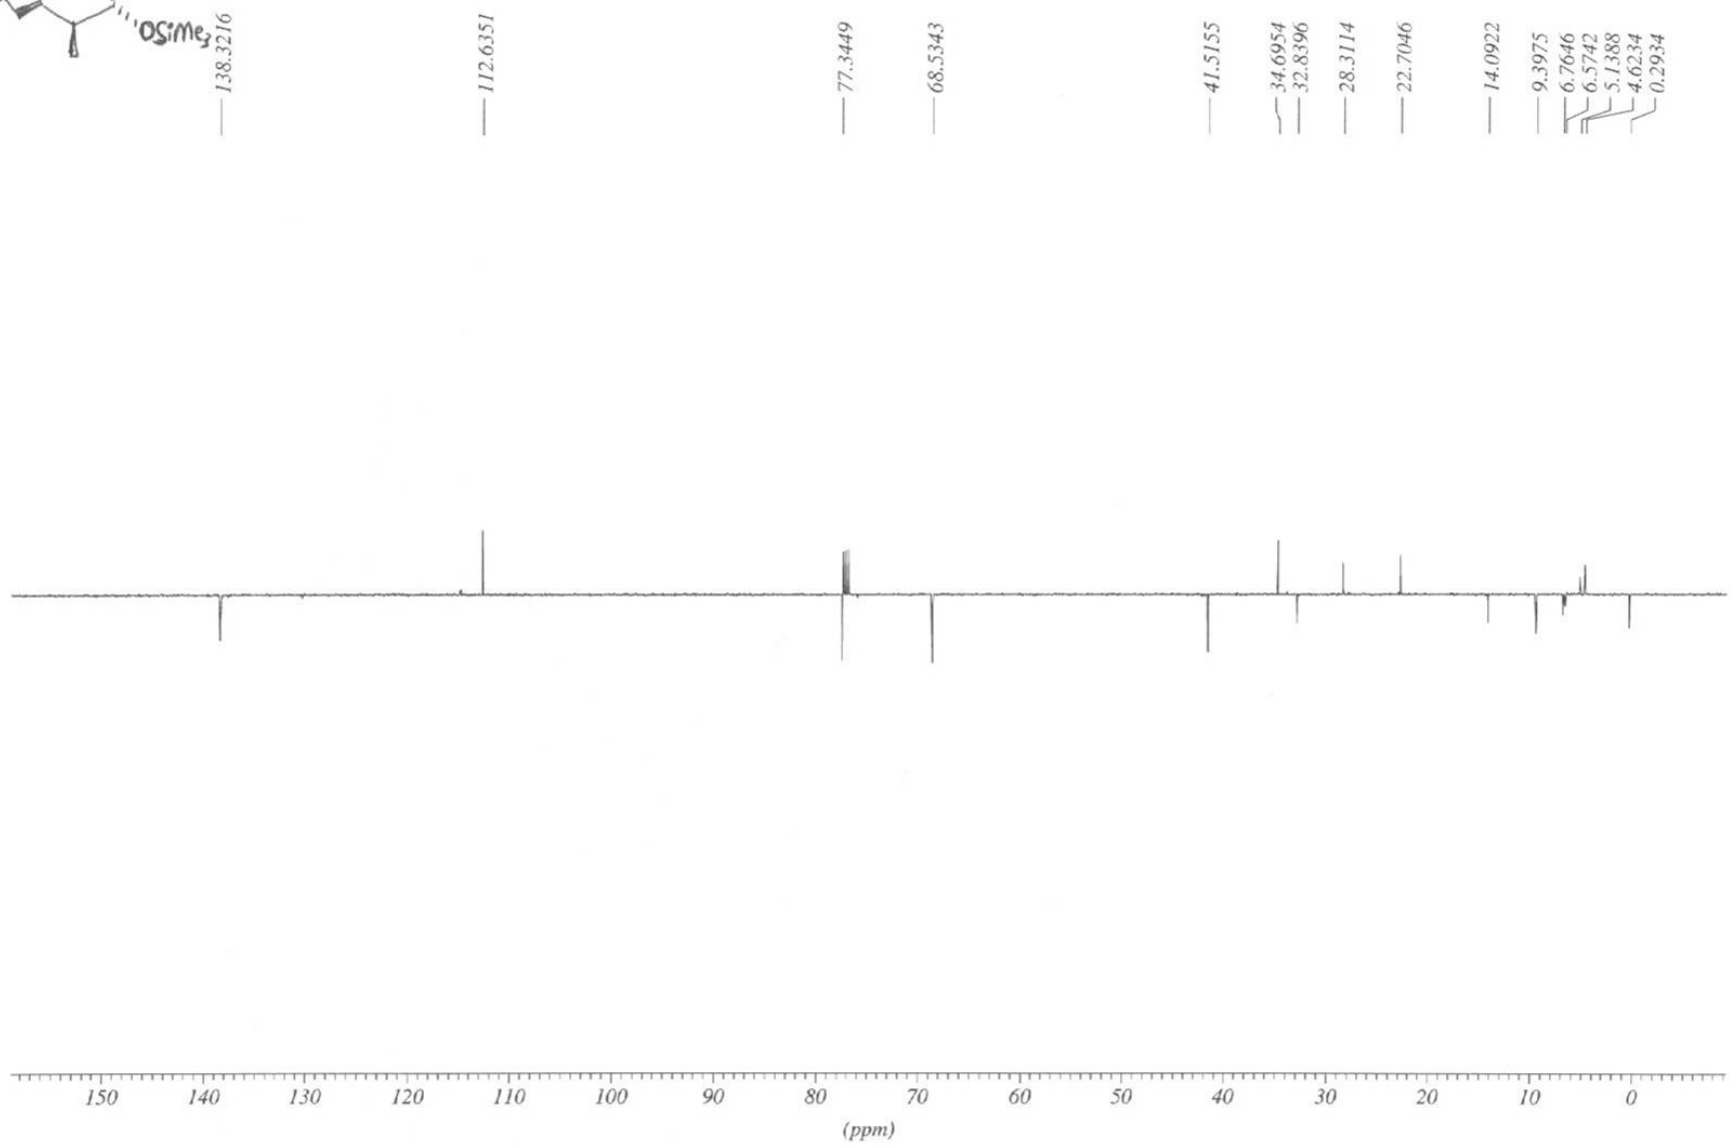

Peter Jarvis Sample 4, 14/11/05 in CDCl<sub>3</sub> at +27C, set temp  
drx500, Gradient COSY90

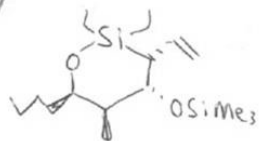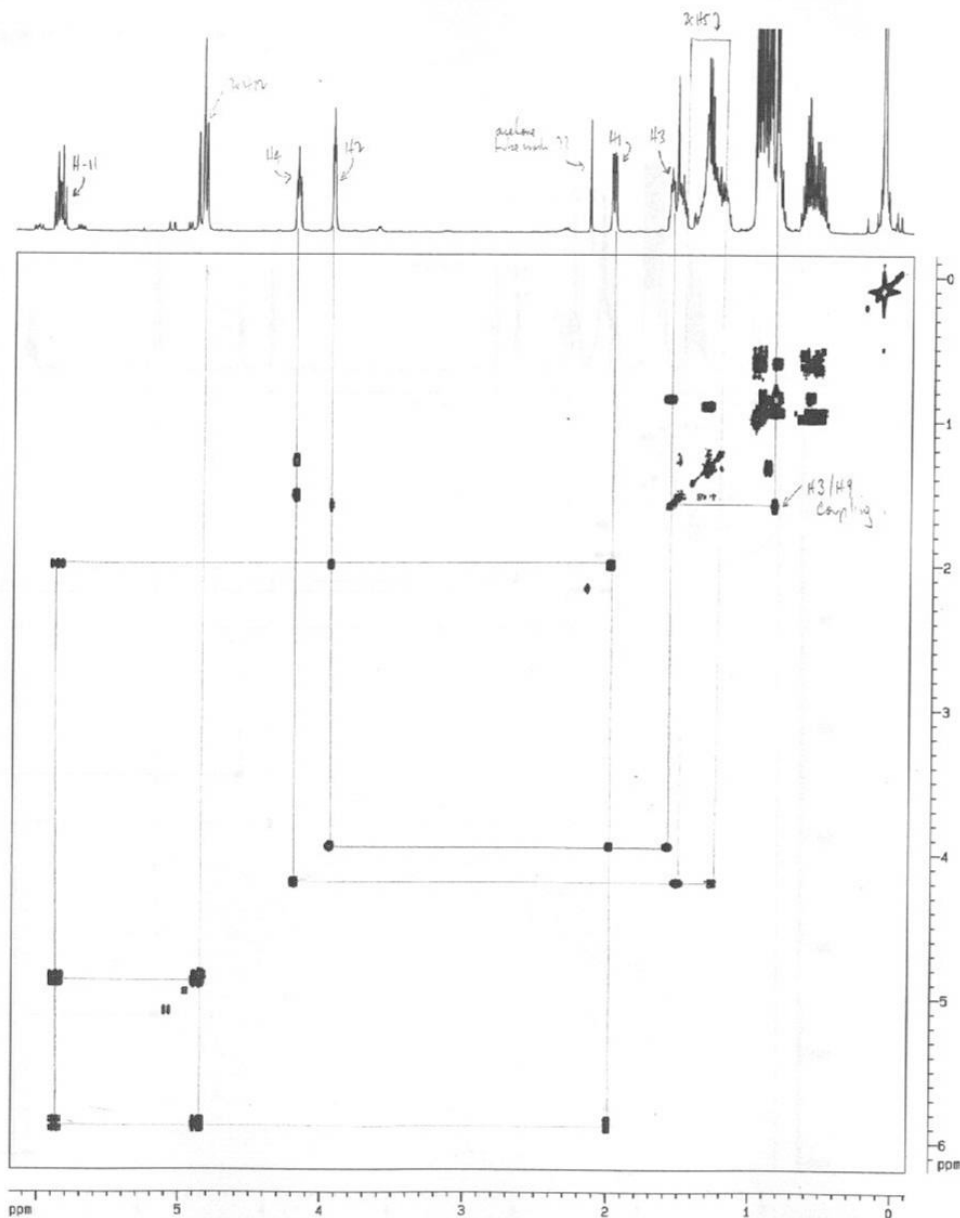

## Current Data Parameters

NAME nv14p1d  
EXPNO 4  
PROCNO 1

## F2 - Acquisition Parameters

Date\_ 20051114  
Time 21.08  
INSTRUM drx500  
PROBHD 5 mm TBI H/C  
PULPROG zgpg30  
TD 2048  
SOLVENT CDCl<sub>3</sub>  
NS 8  
DS 16  
SWH 4310.345 Hz  
FIDRES 2.104851 Hz  
AQ 0.2376180 sec  
RG 128  
DM 116.000 usec  
DE 5.50 usec  
TE 300.0 K  
d0 0.0000300 sec  
D1 2.0000000 sec  
d13 0.0000300 sec  
D16 0.0001000 sec  
IM0 0.00023200 sec

## CHANNEL f1

NUC1 1H  
PO 10.70 usec  
P1 10.70 usec  
PL1 1.00 dB  
SFO1 500.1318867 MHz

## GRADIENT CHANNEL

GRNAM1 SINE.100  
GRNAM2 SINE.100  
GPX1 0.00 %  
GPX2 0.00 %  
GPY1 0.00 %  
GPY2 0.00 %  
GPZ1 10.00 %  
GPZ2 10.00 %  
P16 1000.00 usec

## F1 - Acquisition parameters

ND0 1  
TD 512  
SFO1 500.1319 MHz  
FIDRES 8.418642 Hz  
SW 8.618 ppm

## F2 - Processing parameters

SI 2048  
SF 500.1300233 MHz  
WDW SINE  
SSB 0  
LB 0.00 Hz  
GB 0  
PC 1.00

## F1 - Processing parameters

SI 1024  
MC2 GF  
SF 500.1300233 MHz  
WDW SINE  
SSB 0  
LB 0.00 Hz  
GB 0

## 2D NMR plot parameters

CY2 20.00 cm  
CX1 20.00 cm  
F2PLO 6.186 ppm  
F2LO 3094.69 Hz  
F2PHI -0.116 ppm  
F2HI -58.10 Hz  
F1PLO 6.192 ppm  
F1LO 3096.79 Hz  
F1PHI -0.154 ppm  
F1HI -77.04 Hz  
F2PPMCH 0.31520 ppm/cm  
F2HZCH 157.63908 Hz/cm  
F1PPMCH 0.31730 ppm/cm  
F1HZCH 159.69141 Hz/cm



Peter Jervis Sample 4, 14/11/05 in CDCl<sub>3</sub> at +27C, set temp  
drx500, Gradient HSGC

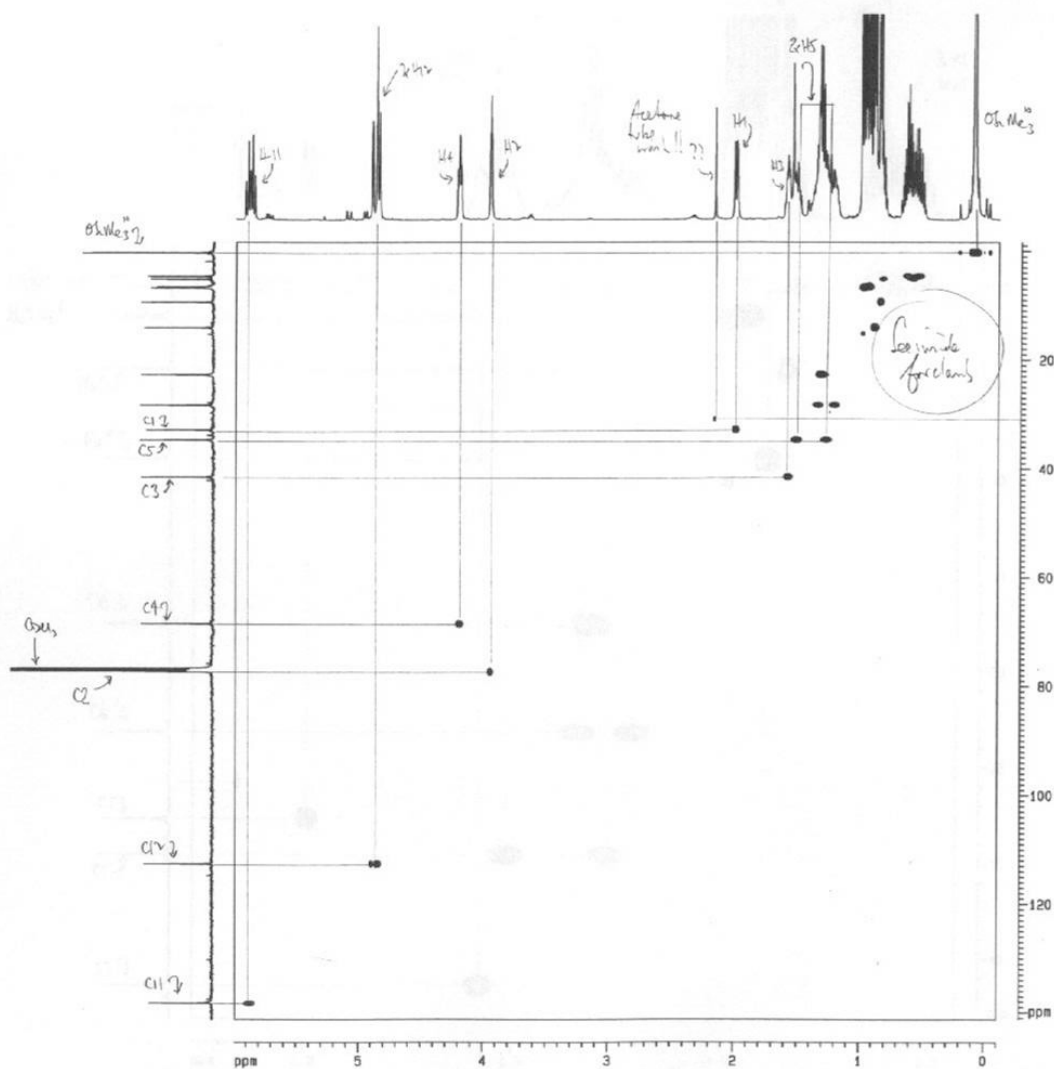

```

Current Data Parameters
NAME      ms4j16
EXPNO    2
PROCNO   1

F2 - Acquisition Parameters
Date_    2005114
Time     15.52
INSTRUM  drx500
PROBHD   5 mm TBI 14C
PULPROG  Invigato
TD        2648
SOLVENT  CDCl3
NS        8
DS        8
SWH       4310.340 Hz
FIDRES    2.104681 Hz
AQ        0.2329160 sec
RG        32788
DM        115.000 usec
DE        8.50 usec
TE        300.0 K
CHS12    145.000000
AQ        0.0000000 sec
Q1        2.0000000 sec
Q4        0.00172414 sec
Q15       0.0300000 sec
Q16       0.0000000 sec
Q18       0.0010000 sec
Q20       0.0010000 sec
Q21       0.00061714 sec
Q22       0.00001140 sec

CHANNEL F1 -----
NUC1      1H
P1        10.70 usec
P2        21.40 usec
PL1       -1.00 dB
SFO1      500.1319887 MHz

CHANNEL F2 -----
CPROG2    gprg
NUC2      13C
P3        12.00 usec
P4        24.00 usec
PCPR2     70.00 usec
PL2       -1.00 dB
PL12      15.00 dB
SFO2      125.7678933 MHz

GRADIENT CHANNEL -----
SFOA01    SIZE:100
SFOA02    SIZE:100
SFOA03    SIZE:100
SFOA04    SIZE:100
SFOA05    SIZE:100
SFOA06    SIZE:100
SFOA07    SIZE:100
SFOA08    SIZE:100
SFOA09    SIZE:100
SFOA10    SIZE:100
SFOA11    SIZE:100
SFOA12    SIZE:100
SFOA13    SIZE:100
SFOA14    SIZE:100
SFOA15    SIZE:100
SFOA16    SIZE:100
SFOA17    SIZE:100
SFOA18    SIZE:100
SFOA19    SIZE:100
SFOA20    SIZE:100
SFOA21    SIZE:100
SFOA22    SIZE:100
SFOA23    SIZE:100
SFOA24    SIZE:100
SFOA25    SIZE:100
SFOA26    SIZE:100
SFOA27    SIZE:100
SFOA28    SIZE:100
SFOA29    SIZE:100
SFOA30    SIZE:100
SFOA31    SIZE:100
SFOA32    SIZE:100
SFOA33    SIZE:100
SFOA34    SIZE:100
SFOA35    SIZE:100
SFOA36    SIZE:100
SFOA37    SIZE:100
SFOA38    SIZE:100
SFOA39    SIZE:100
SFOA40    SIZE:100
SFOA41    SIZE:100
SFOA42    SIZE:100
SFOA43    SIZE:100
SFOA44    SIZE:100
SFOA45    SIZE:100
SFOA46    SIZE:100
SFOA47    SIZE:100
SFOA48    SIZE:100
SFOA49    SIZE:100
SFOA50    SIZE:100

F1 - Acquisition parameters
MD0      4
TD        6552
SFO1     125.7689 MHz
FIDRES    42.531088 Hz
SH        174.360 ppm

F2 - Processing parameters
SI        2648
SF        500.1300000 MHz
WCW       60136
SBB       2
LB        0.00 Hz
GB        0
PC        1.00

F1 - Processing parameters
SI        1024
MC2       1024
SF        125.7577810 MHz
WCW       60136
SBB       2
LB        0.00 Hz
GB        0

2D NMR plot parameters
CX2      17.00 cm
CX1      17.00 cm
F2P10    5.000 ppm
F2L0     2895.77 Hz
F2PHI    -0.104 pps
F2R0     -51.70 Hz
F1P10    141.374 ppm
F1L0     17778.83 Hz
F1PHI    -1.574 pps
F1R0     -219.47 Hz
F2P10CN  0.39544 ppm/cm
F2R0CN   178.28726 Hz/cm
F1P10CN  8.41480 ppm/cm
F1R0CN   1058.19480 Hz/cm
  
```

Peter Jarvis Sample 4, 14/11/05 in CDCl3 at +27C, set temp  
 drx500, Gradient HSGC

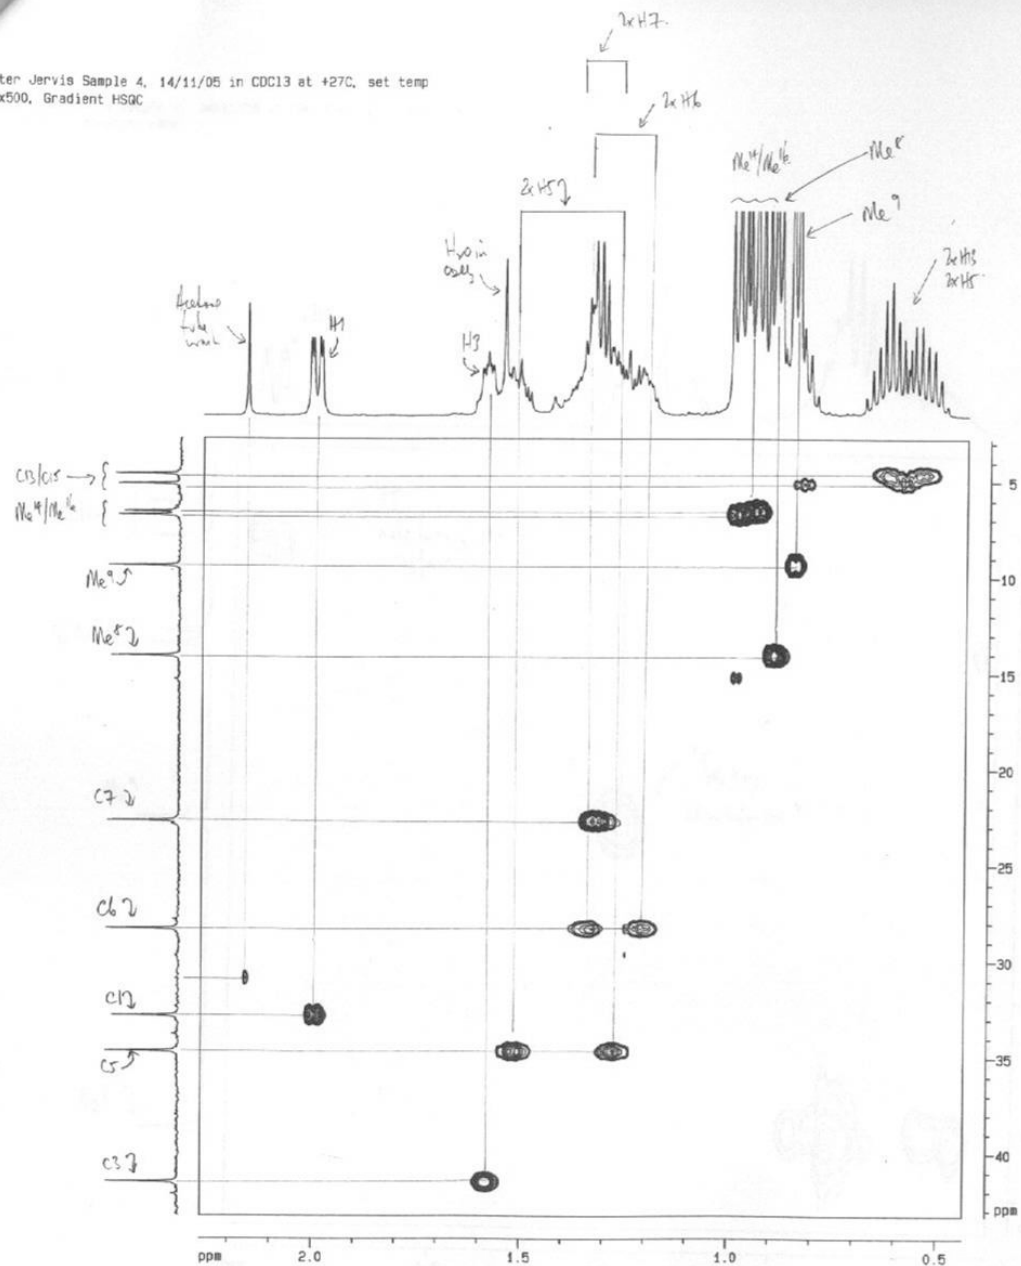

Peter Jarvis Sample 4, 14/11/05 in CDCl<sub>3</sub> at +27C, set temp  
drx500, Gradient HMBC

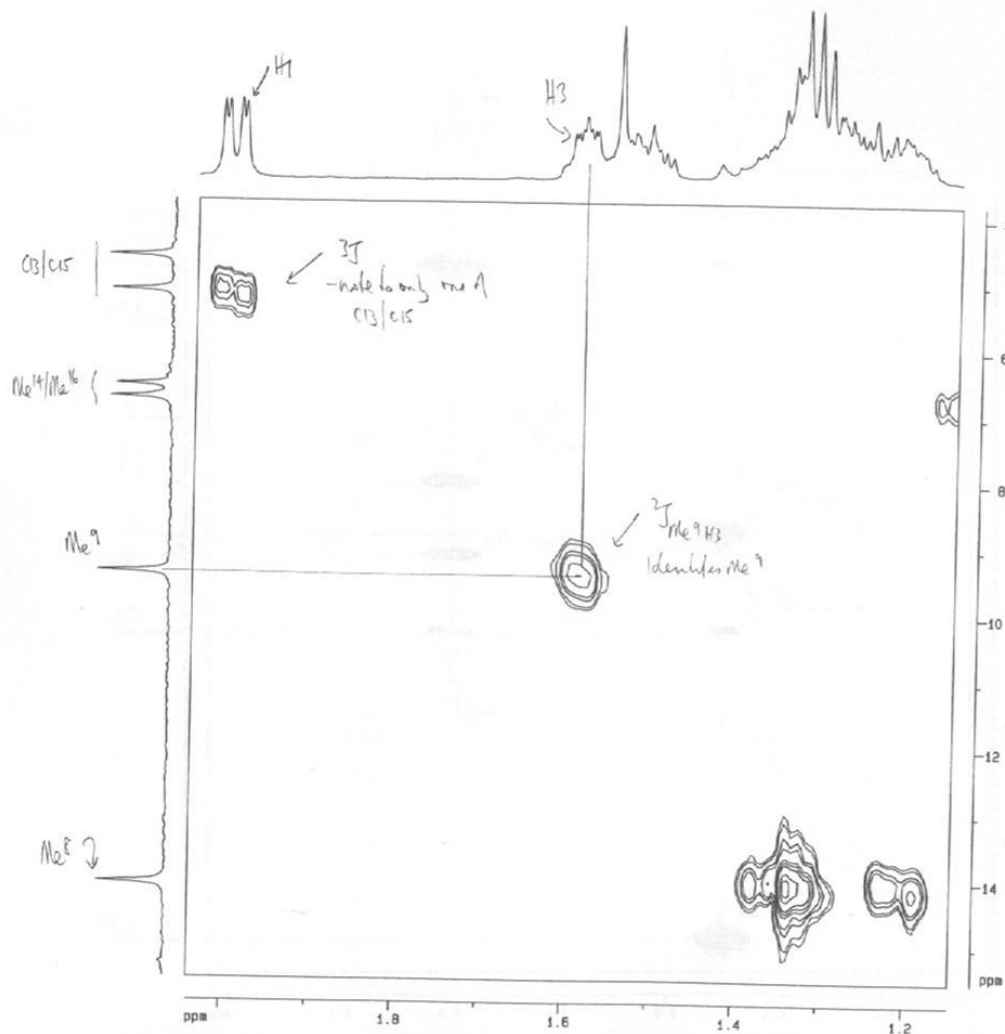

Current Data Parameters  
NAME hv14p11d  
EXPNO 3  
PROCNO 1

F2 - Acquisition Parameters  
Date\_ 2005114  
Time 18.26  
INSTRUM drx500  
PROBHD 5 mm TBI H/C  
PULPROG invgpp12fmc  
TD 2048  
SOLVENT CDCl<sub>3</sub>  
NS 8  
DS 16  
SWH 4310.345 Hz  
FIDRES 2.104661 Hz  
AQ 0.2376180 sec  
RG 32768  
DM 116.000 usec  
DE 5.00 usec  
TE 300.2 K  
DVS1 180.0000000  
d0 0.00000300 sec  
d1 2.00000000 sec  
d2 0.00312500 sec  
d3 0.10000000 sec  
d13 0.00000300 sec  
d16 0.00010000 sec  
IN0 0.0000280 sec

CHANNEL f1  
NUC1 1H  
P1 10.70 usec  
p2 21.40 usec  
PL1 1.00 dB  
SFO1 500.1318867 MHz

CHANNEL f2  
NUC2 13C  
P3 12.00 usec  
PL2 -1.00 dB  
SFO2 125.7667893 MHz

GRADIENT CHANNEL  
GRANA1 SINE.100  
GRANA2 SINE.100  
GRANA3 SINE.100  
SPX1 0.00 %  
SPX2 0.00 %  
SPX3 0.00 %  
SPY1 0.00 %  
SPY2 0.00 %  
SPY3 0.00 %  
SPZ1 50.00 %  
SPZ2 30.00 %  
SPZ3 40.10 %  
P16 1000.00 usec

F1 - Acquisition parameters  
ND0 2  
TD 512  
SFO1 125.7667893 MHz  
FIDRES 42.531608 Hz  
SW 174.309 ppm

F2 - Processing parameters  
SI 2048  
SF 500.1302333 MHz  
WDW QSINE  
SBB 2  
LB 0.00 Hz  
GB 0  
PC 0.20

F1 - Processing parameters  
SI 1024  
MC2 6F  
SF 125.7577810 MHz  
WDW QSINE  
SBB 2  
LB 0.00 Hz  
GB 0

2D NMR plot parameters  
CX2 17.00 cm  
CX1 17.00 cm  
F2PL0 2.038 ppm  
F2L0 1019.48 Hz  
F2PHI 1.148 ppm  
F2H0 573.30 Hz  
F1PL0 15.526 ppm  
F1L0 1954.52 Hz  
F1PHI 3.776 ppm  
F1H0 474.83 Hz  
F2PRCH 0.05248 ppm/cm  
F2QZM 26.24636 Hz/cm  
F1PRCH 0.89119 ppm/cm  
F1QZM 46.89213 Hz/cm

Peter Jarvis Sample 4, 14/11/05 in CDCl<sub>3</sub> at +27C, set temp  
 drx500, Gradient HMBC

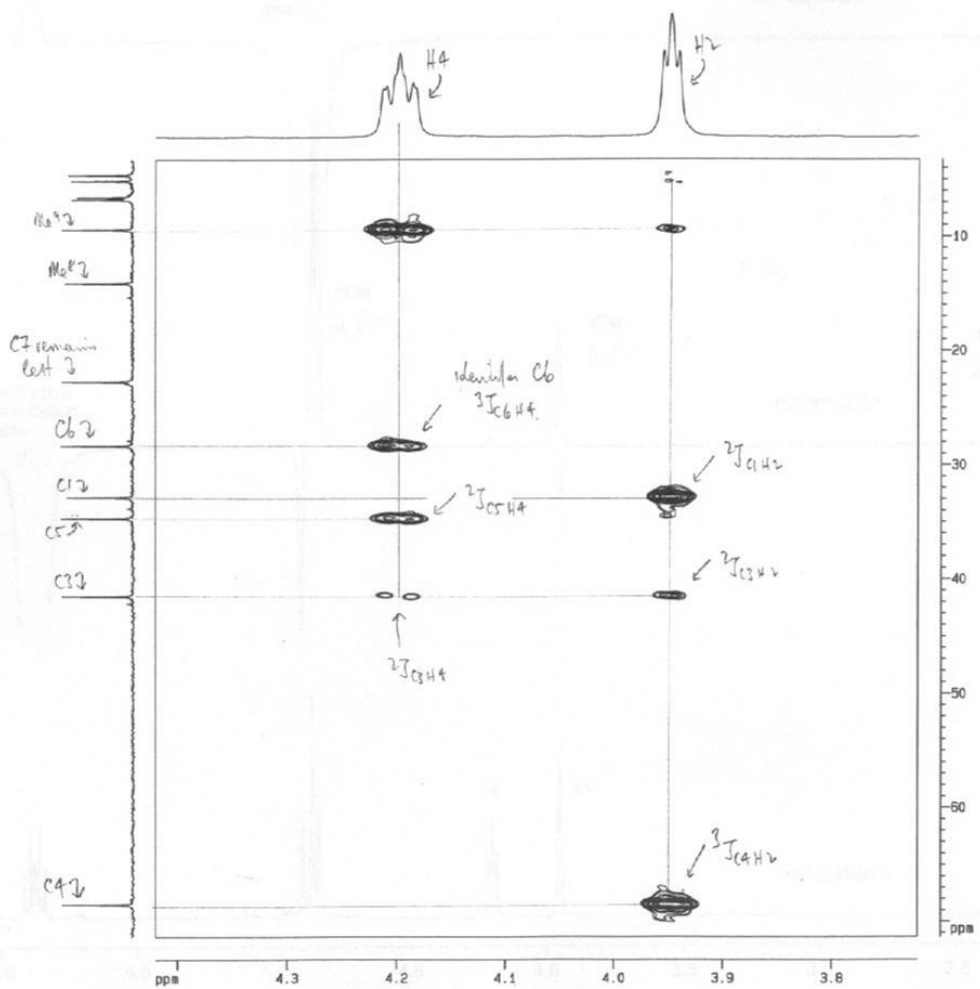

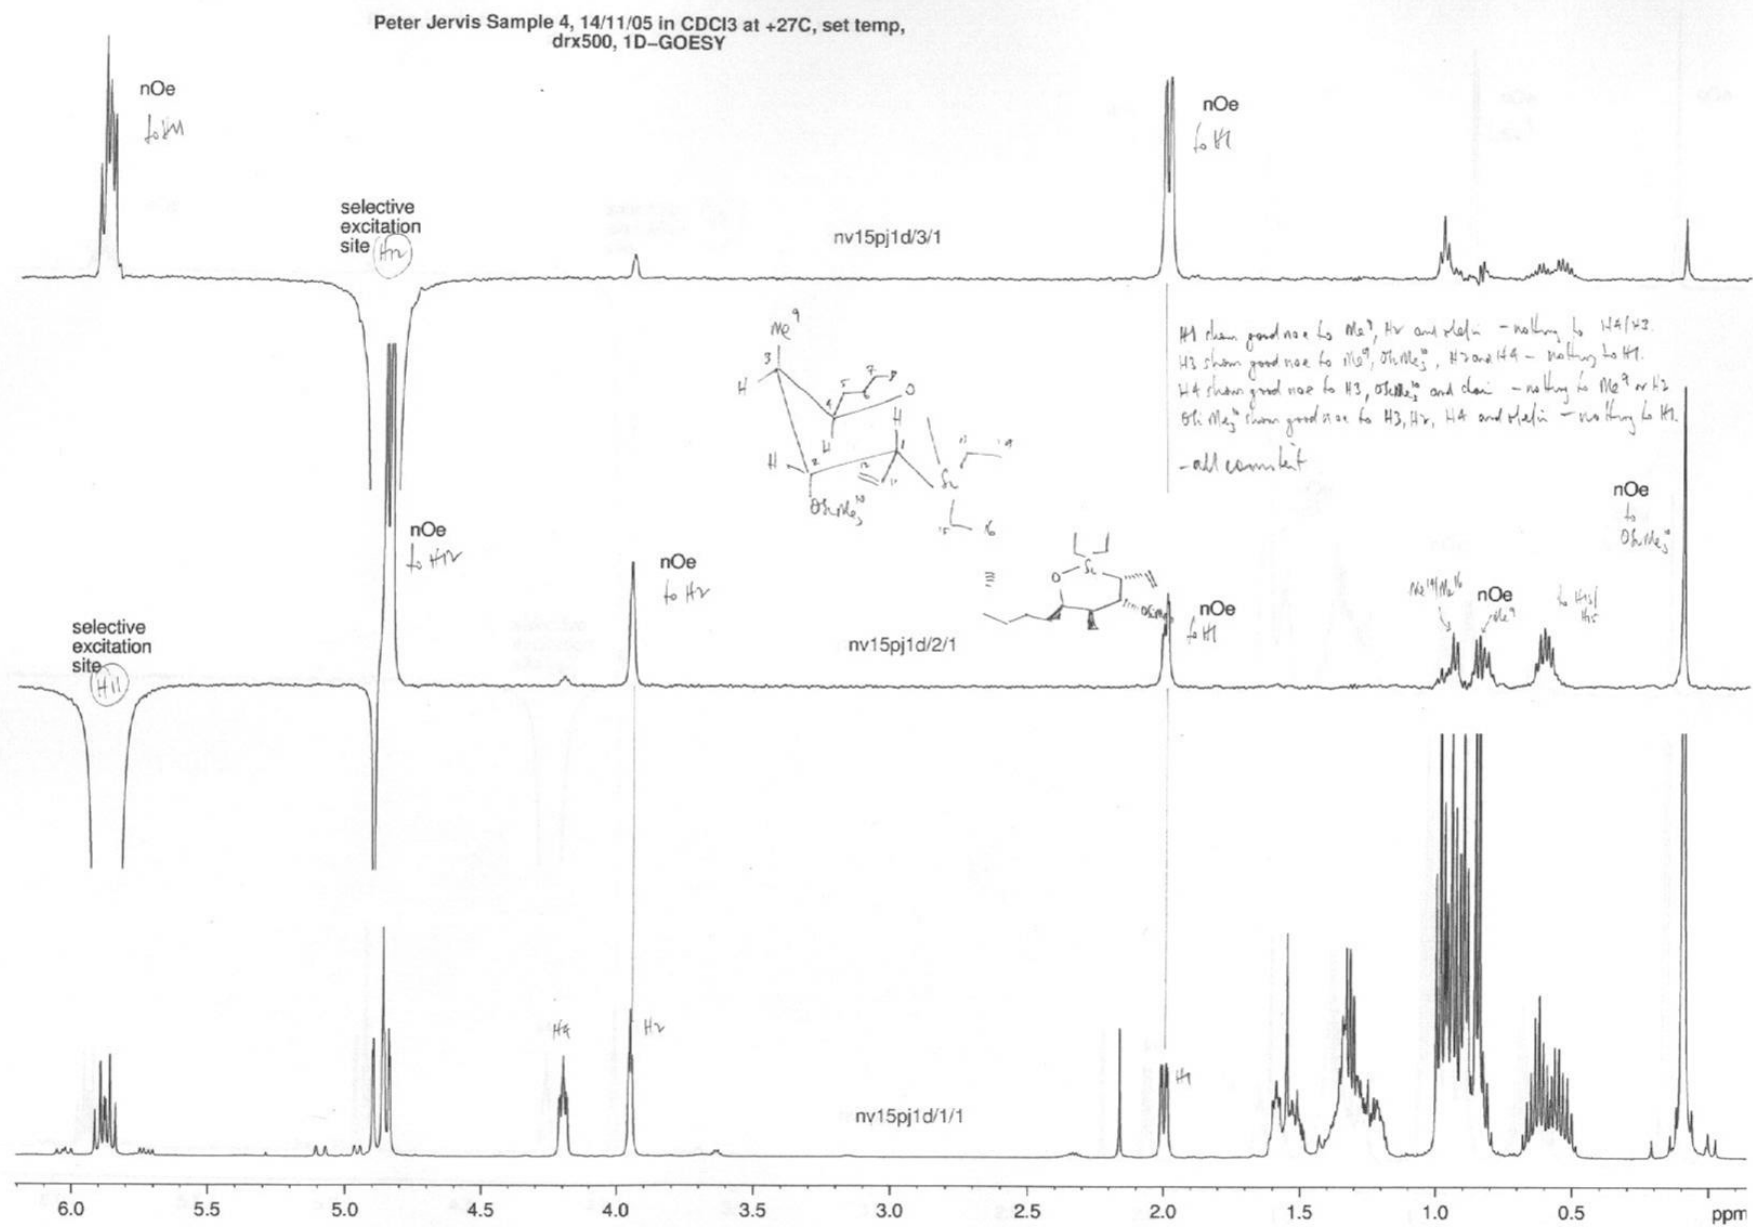



Peter Jarvis Sample 4, 14/11/05 in CDCl<sub>3</sub> at +27°C, set temp,  
drx500, 1D-GOESY

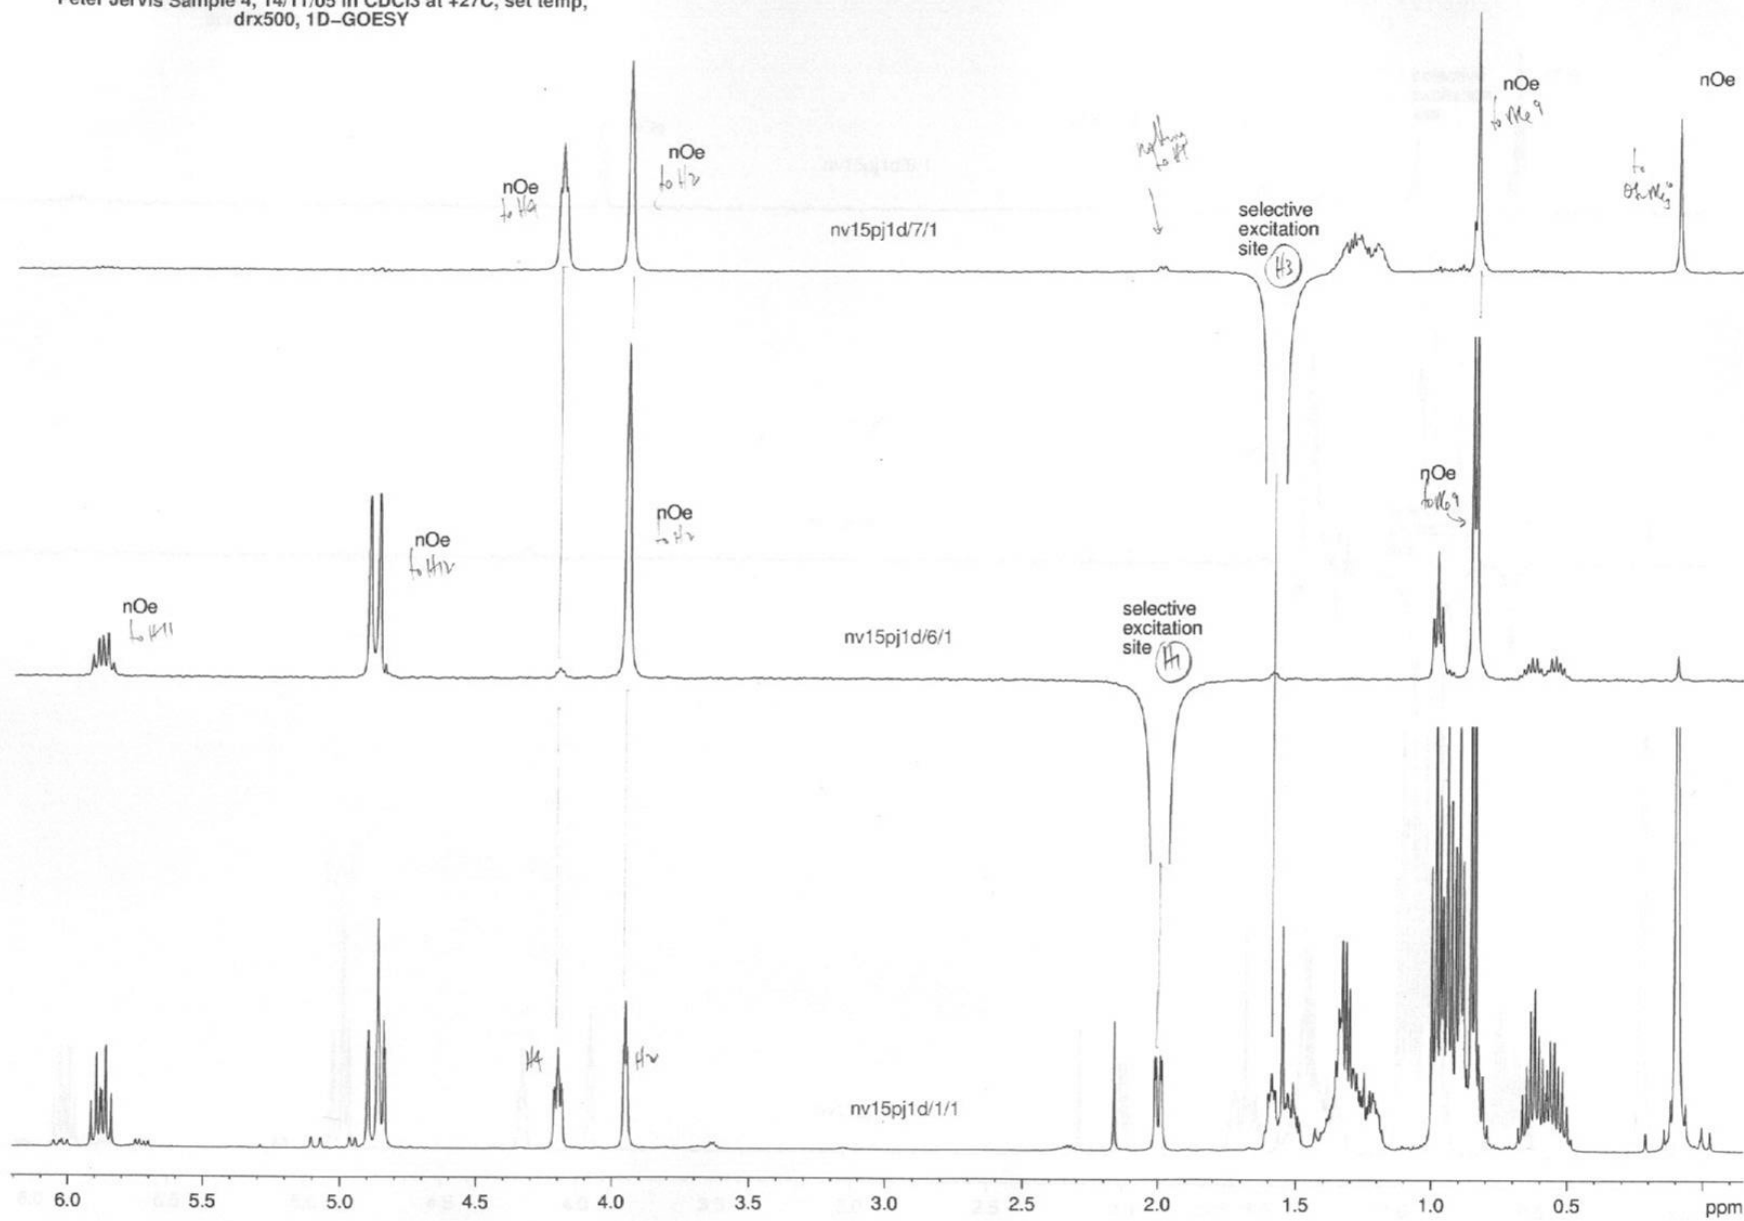

Peter Jervis Sample 4, 14/11/05 in CDCl<sub>3</sub> at +27C, set temp,  
drx500, 1D-GOESY

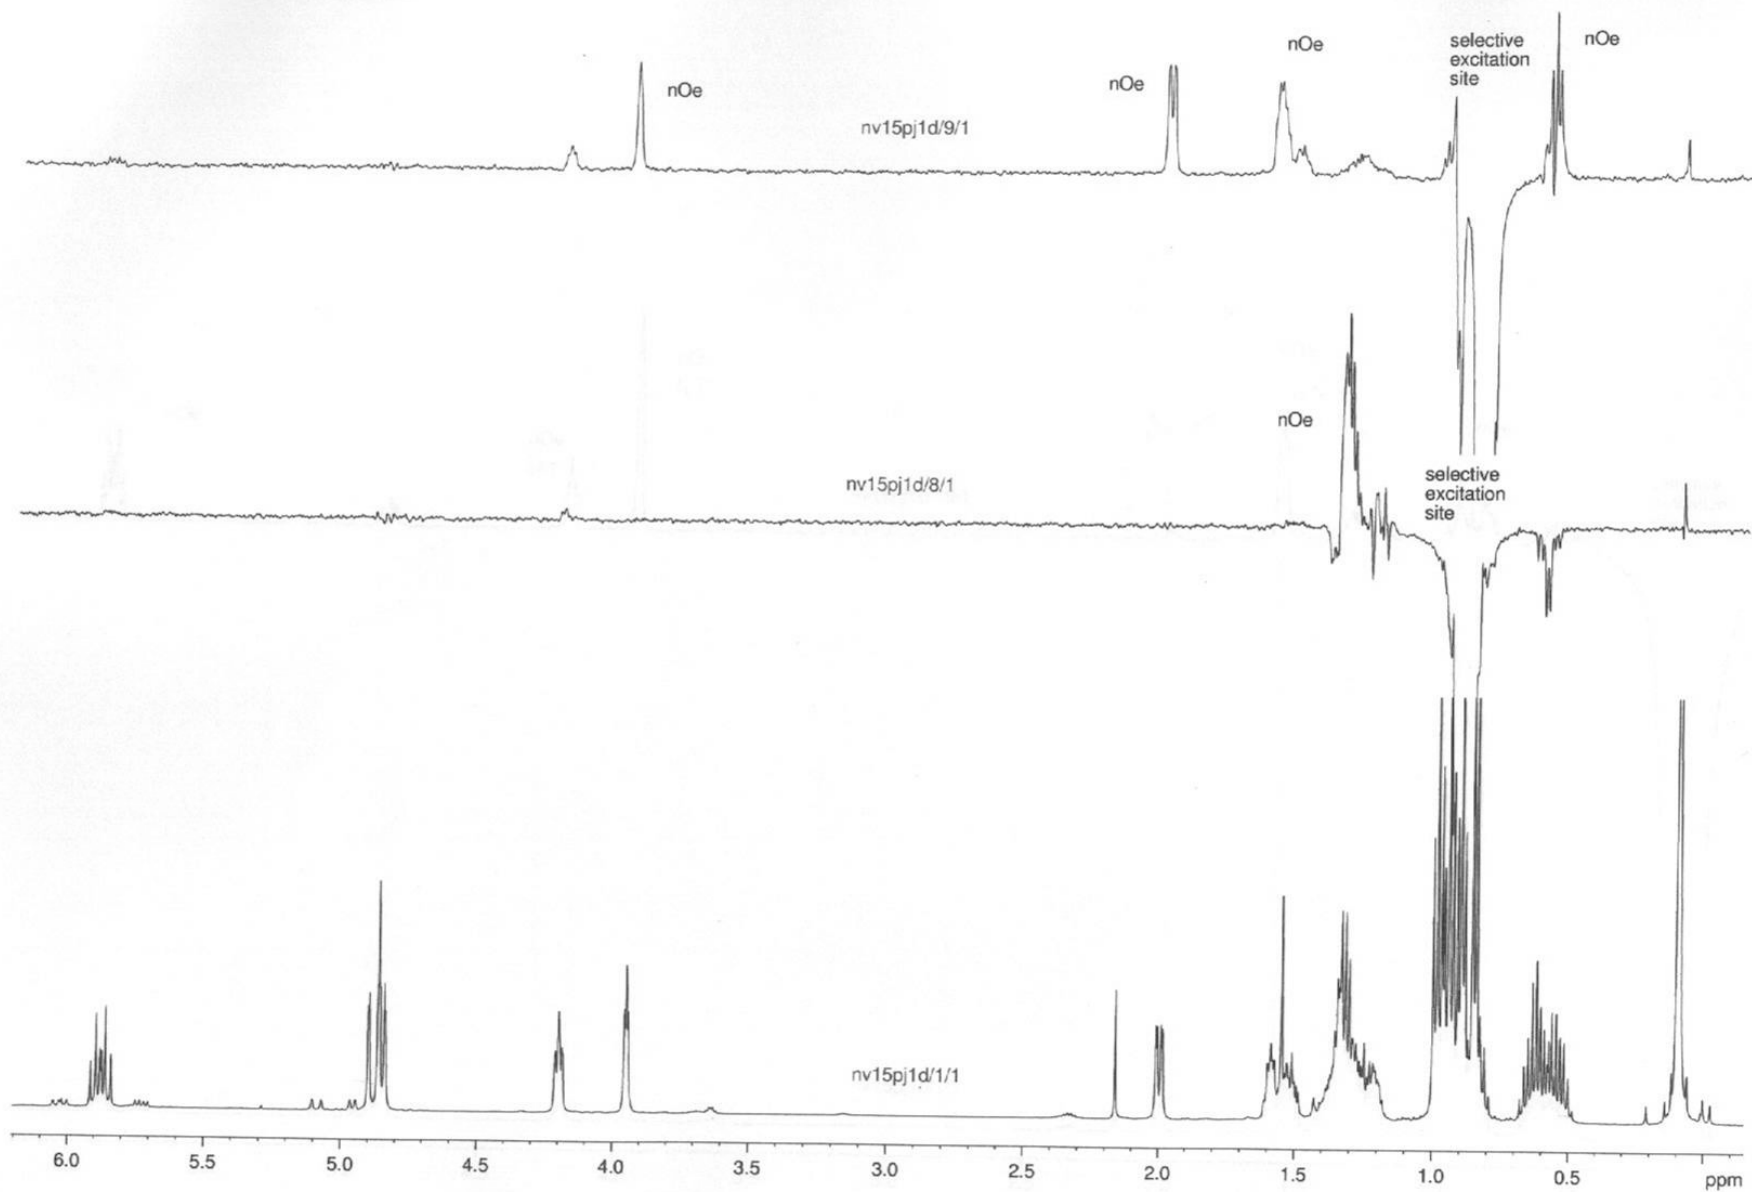

Supplement: Beilstein_J_Org_Chem-03-06-s003.pdf [file Beilstein_J_Org_Chem-03-06-s003.pdf]
