# Supplementary material for: Tether-directed synthesis of highly substituted oxasilacycles via an intramolecular allylation employing allylsilanes
Source: PubMed Central journal article supplement (PMC1810303; doi:10.1186/1860-5397-3-6), 2007-02-08

## Additional File 4

**Tether-directed synthesis of highly substituted oxasilacycles *via* an intramolecular allylation employing allylsilanes**

Peter J. Jervis and Liam R. Cox\*

email: l.r.cox@bham.ac.uk

**$^1\text{H-NMR}$  and  $^{13}\text{C-NMR}$  Spectra for the following compounds:**

**18a, 19a**

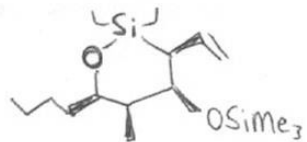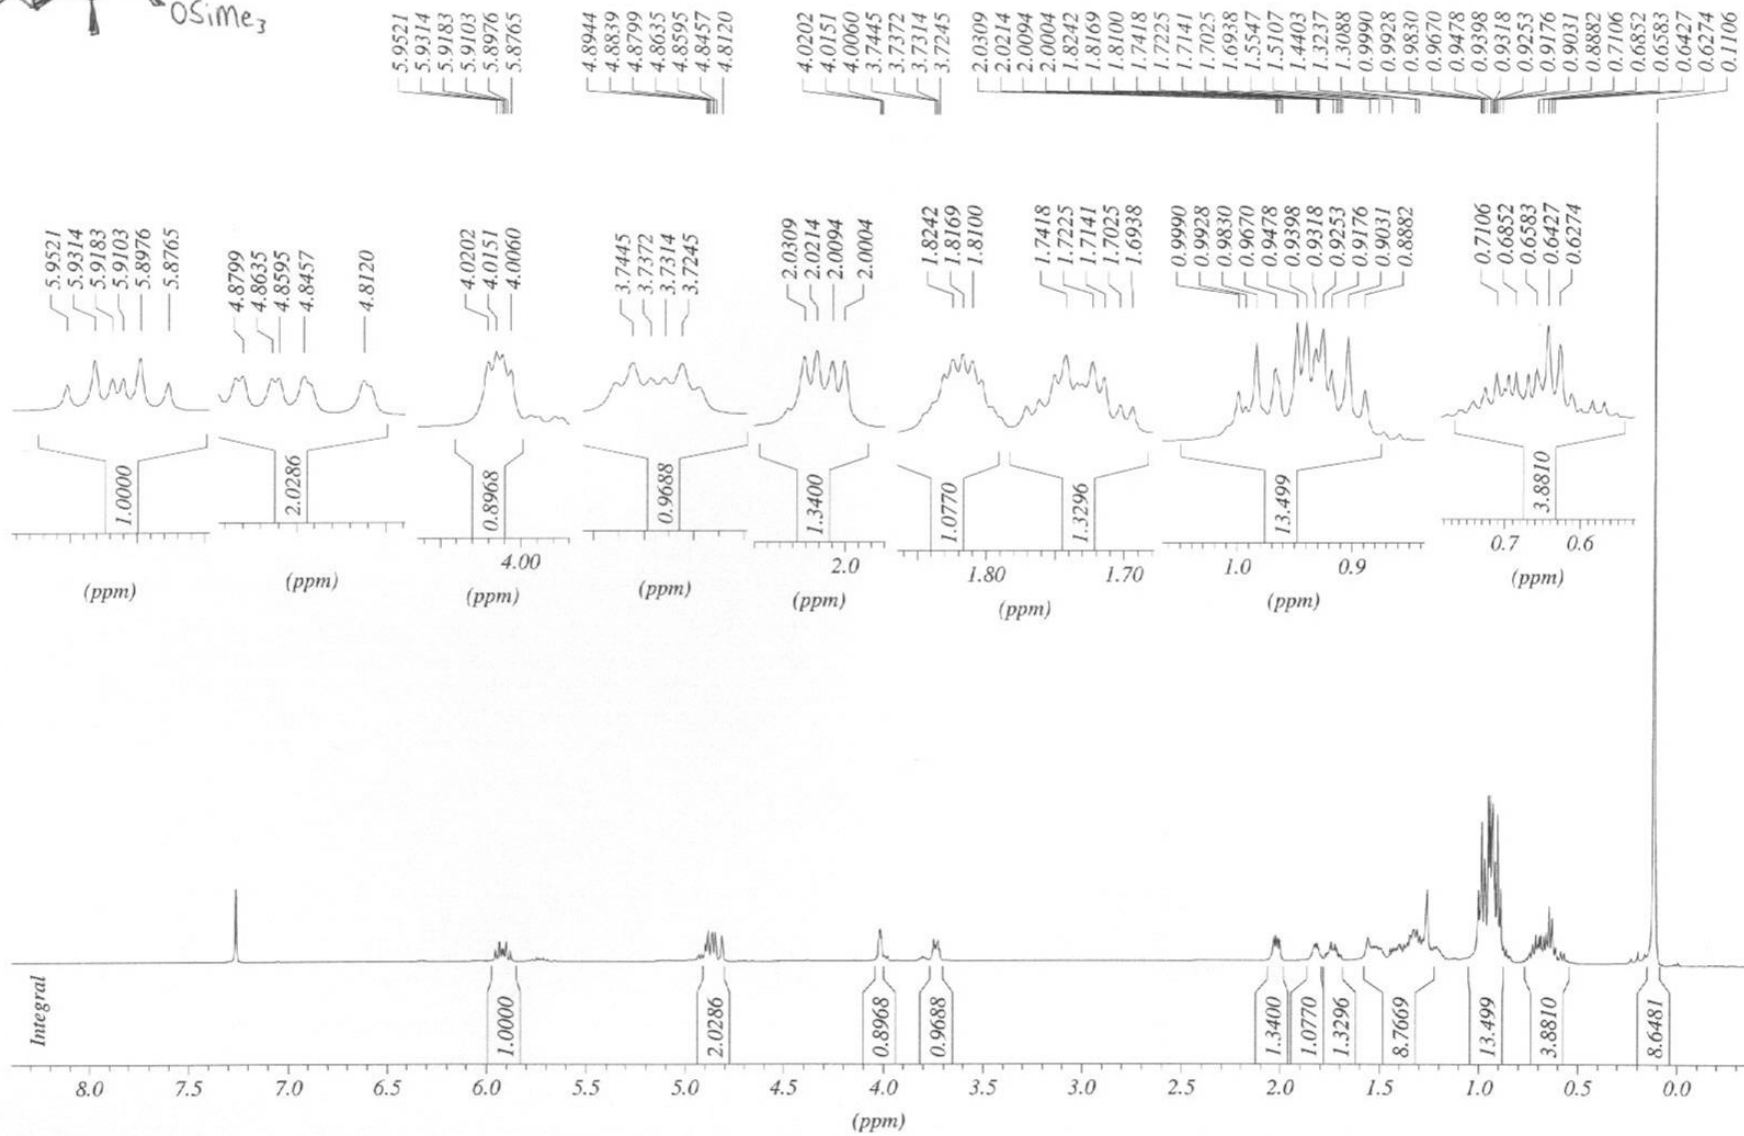

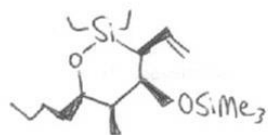

— 137.9171

— 113.4598

— 76.5836  
— 76.2188

— 42.7288

— 39.3584

— 33.7358

— 29.2155

— 22.7760

— 14.0764

— 11.9035

— 6.7646

— 6.4474

— 6.0826

— 4.7820

— 0.4916

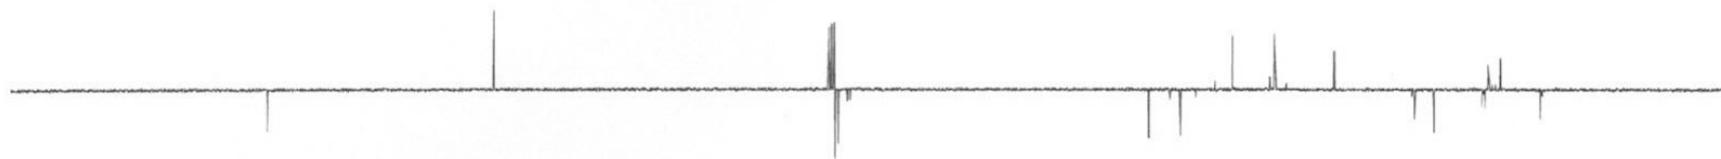

160 150 140 130 120 110 100 90 80 70 60 50 40 30 20 10 0 -10  
(ppm)

Peter Jervis Sample 3, 22/11/05 in CDCl3 at +27C, set temp  
 drx500, Gradient COSY90

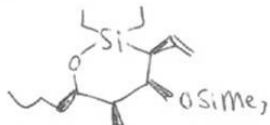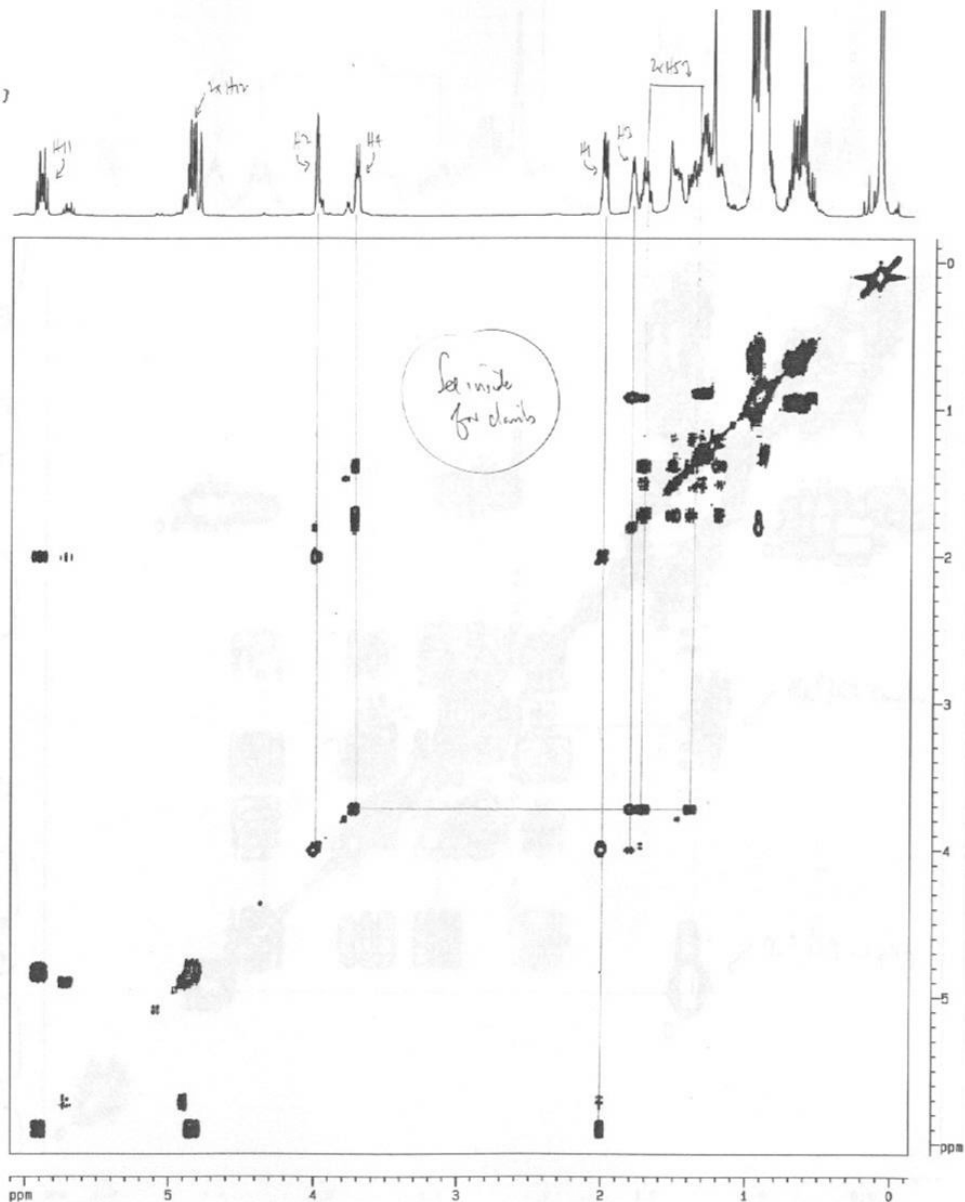

Current Data Parameters  
 NAME nv22pjid  
 EXPNO 4  
 PROCNO 1

F2 - Acquisition Parameters  
 Date\_ 20051122  
 Time 21.24  
 INSTRUM drx500  
 PROBHD 5 mm TBI H/C  
 PULPROG cosygp  
 TD 2048  
 SOLVENT CDCl3  
 NS 8  
 DS 16  
 SMH 4310.345 Hz  
 FIDRES 2.104651 Hz  
 AQ 0.2378180 sec  
 RG 114  
 DM 115.000 usec  
 DE 5.50 usec  
 TE 300.0 K  
 D0 0.0000300 sec  
 D1 2.0000000 sec  
 D15 0.0000300 sec  
 D16 0.0010000 sec  
 INO 0.00023200 sec

----- CHANNEL f1 -----  
 NUC1 1H  
 PC 10.70 usec  
 P1 10.70 usec  
 PL1 1.00 dB  
 SF01 500.1318867 MHz

----- GRADIENT CHANNEL -----  
 GPMAX1 SINE.100  
 GPMAX2 SINE.100  
 GPX1 0.00 %  
 GPX2 0.00 %  
 GPY1 0.00 %  
 GPY2 0.00 %  
 SPZ1 10.00 %  
 SPZ2 10.00 %  
 P16 1000.00 usec

F1 - Acquisition parameters  
 NCO 1  
 TD 512  
 SF01 500.1318 MHz  
 FIDRES 8.418642 Hz  
 SN 8.618 ppm

F2 - Processing parameters  
 SI 2048  
 SF 500.1300233 MHz  
 NDM SINE  
 SSB 0  
 LB 0.00 Hz  
 GB 0  
 PC 1.00

F1 - Processing parameters  
 SI 1024  
 MC2 GF  
 SF 500.1300233 MHz  
 NDM SINE  
 SSB 0  
 LB 0.00 Hz  
 GB 0

2D NMR plot parameters  
 CX2 20.00 cm  
 CX1 20.00 cm  
 F2PLO 6.104 ppm  
 F2LO 3052.59 Hz  
 F2PHI -0.129 ppm  
 F2PI -64.41 Hz  
 F1PLO 6.074 ppm  
 F1LO 3037.86 Hz  
 F1PHI -0.162 ppm  
 F1PI -81.25 Hz  
 F2PPMCH 0.31162 ppm/cm  
 F2HZCH 155.85011 Hz/cm  
 F1PPMCH 0.31183 ppm/cm  
 F1HZCH 155.95835 Hz/cm

Peter Jervis Sample 3, 22/11/05 in CDCl3 at +27C, set temp  
drx500, Gradient DQSY90

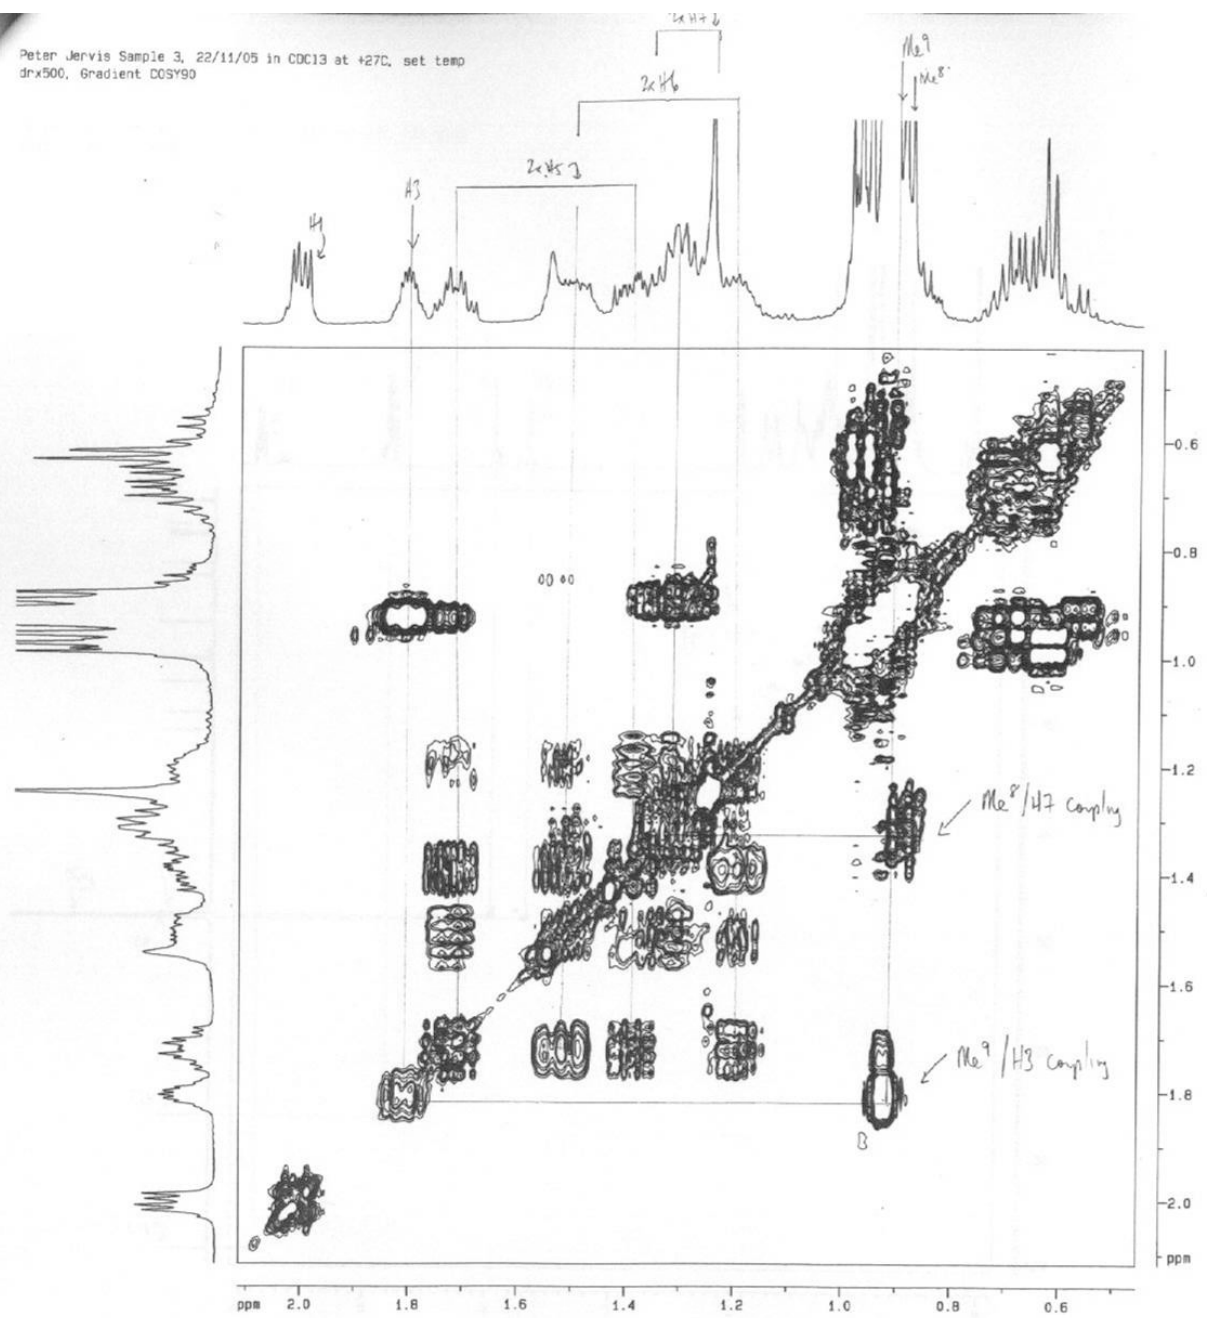

Peter Jervis Sample 3, 22/11/05 in CDCl3 at +27C, set temp  
drx500, Gradient HSQC

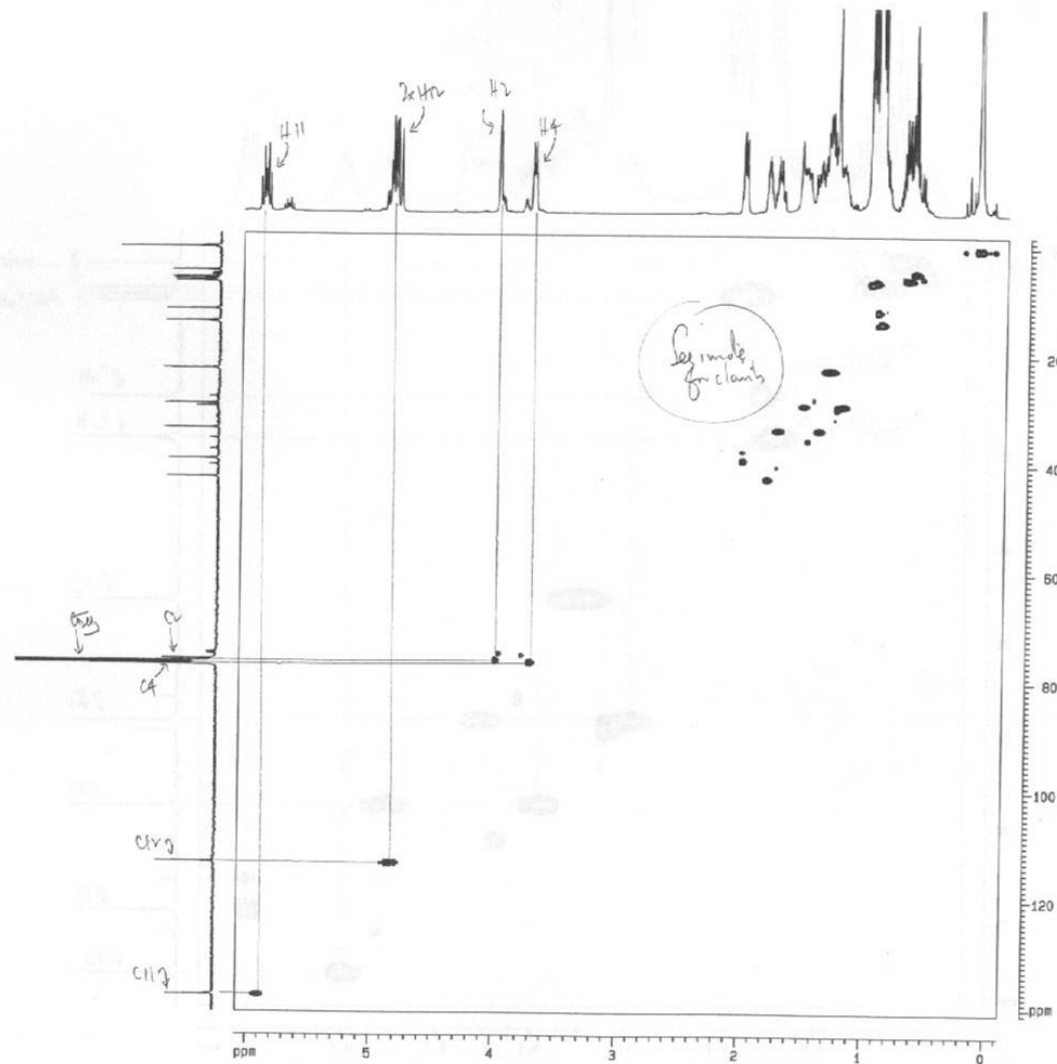

```

Current Data Parameters
NAME          nv20p114
EXPNO         2
PROCNO        1

F2 - Acquisition Parameters
Date_         20051122
Time          18.07
INSTRUM       drx500
PROBHD        5 mm THT 1H/1
PULPROG       invgpg2
TD            2648
SOLVENT       CDCl3
NS            8
DS            16
SWH           4310.346 Hz
FIDRES       2.104681 Hz
AQ           0.2376180 sec
RG           32750
DM           118.000 usec
DE           5.80 usec
TE           300.0 K
CNS12        145.000000
d0           0.0000000 sec
D1           2.0000000 sec
d4           0.00172414 sec
d11         0.0000000 sec
d13         0.0000000 sec
D18         0.00010000 sec
d20         0.00110000 sec
d21         0.00061714 sec
D30         0.00001140 sec

----- CHANNEL f1 -----
NUC1          1H
P1           10.70 usec
P2           21.40 usec
PL1          1.00 dB
SFO1         500.1310867 MHz

----- CHANNEL f2 -----
COPROG2      gpgp
NUC2          13C
P3           12.00 usec
P4           24.00 usec
PPO2         -1.00 dB
PL2          15.00 dB
SFO2         125.7687893 MHz

----- GRADIENT CHANNEL -----
GPMAX1       SINE.100
GPMAX2       SINE.100
GPMAX3       SINE.100
GPI1         0.00 %
GPI2         0.00 %
GPI3         0.00 %
GPI4         0.00 %
GPI5         80.00 %
GPI6         30.00 %
GPI7         20.10 %
P16          1000.00 usec

F1 - Acquisition parameters
NUC          4
TD           512
SFO1         125.7688 MHz
FIDRES       42.821995 Hz
SW           174.389 ppm

F2 - Processing parameters
SI           2648
SF           500.1300233 MHz
WDW          GAUSSINE
SSB          2
LB           0.00 Hz
GB           0
PC           1.00

F1 - Processing parameters
SI           1024
WDW          TRF2
SF           125.7677010 MHz
WDW          GAUSSINE
SSB          2
LB           0.00 Hz
GB           0

2D NMR plot parameters
CQ1          17.00 cm
CQ2          17.00 cm
CQ3          6.863 ppm
F2PL0        3042.07 Hz
F2PH0        -0.128 ppm
F2PC0        -84.41 Hz
F1PL0        141.033 ppm
F1PH0        17736.00 Hz
F1PC0        -2.014 ppm
F1PH1        -253.31 Hz
F2PHDCM      0.38537 ppm/cm
F1PHDCM      182.73480 Hz/cm
F1PCDCM      6.41480 ppm/cm
F1PHDCM      1008.19488 Hz/cm

```

Peter Jarvis Sample 3, 22/11/05 in CDCl3 at +27C, set temp  
drx500, Gradient HSGC

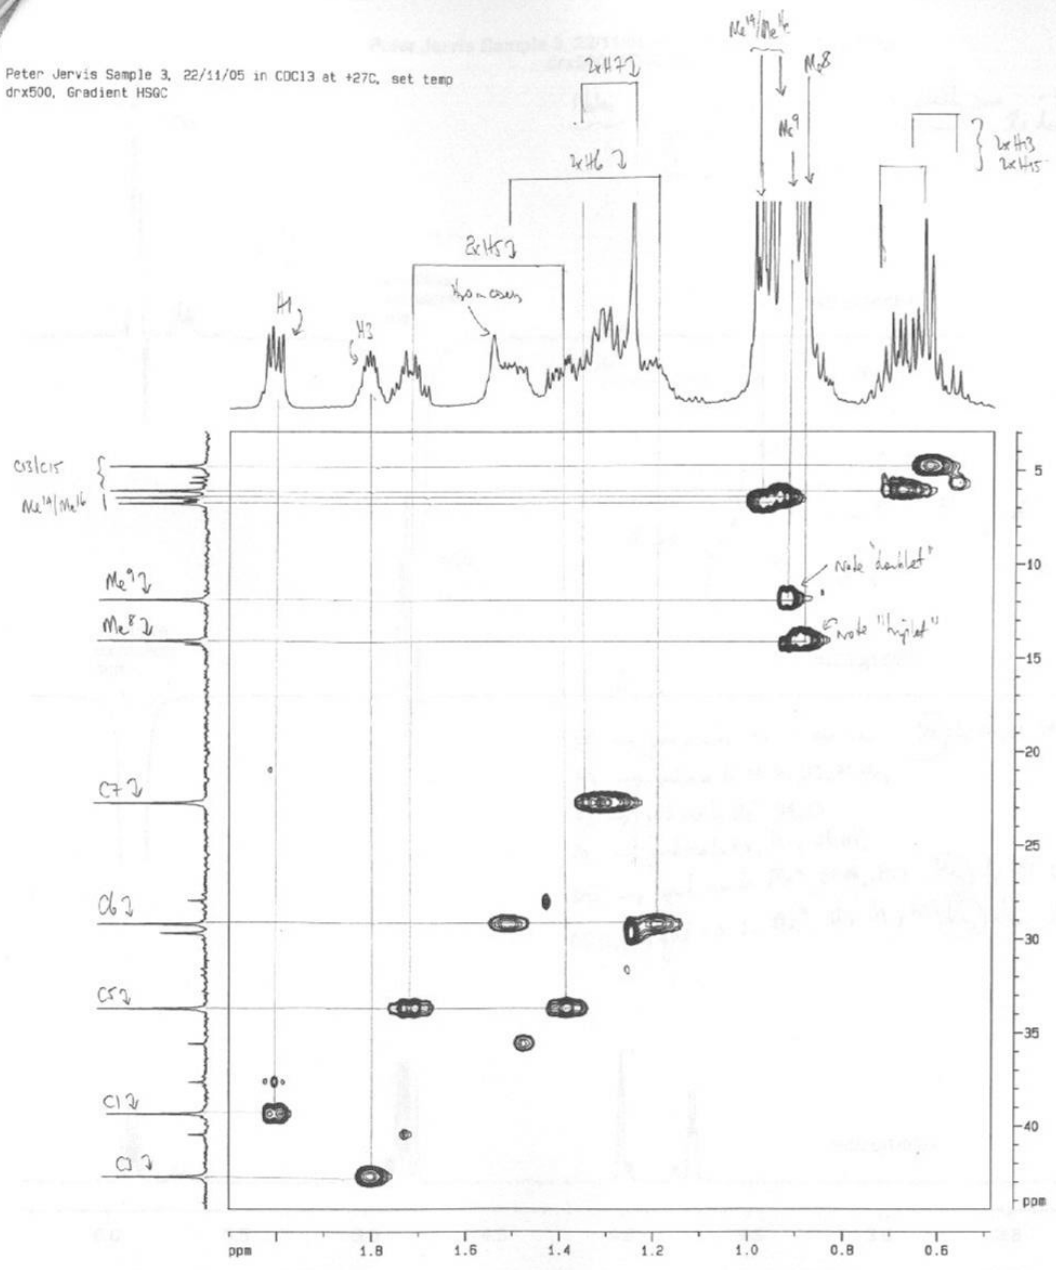

Peter Jervis Sample 3, 22/11/05 in CDCl3 at +27C, set temp, drx500, 1D-GOESY

Current Data Parameters  
nv23p1d

Note: The compound is not completely pure - the rise exp'n centres and for example, in 2/1, immediately below, you can see noise from the impurities! The data is good, however, if you concentrate on the obvious, large, ones.

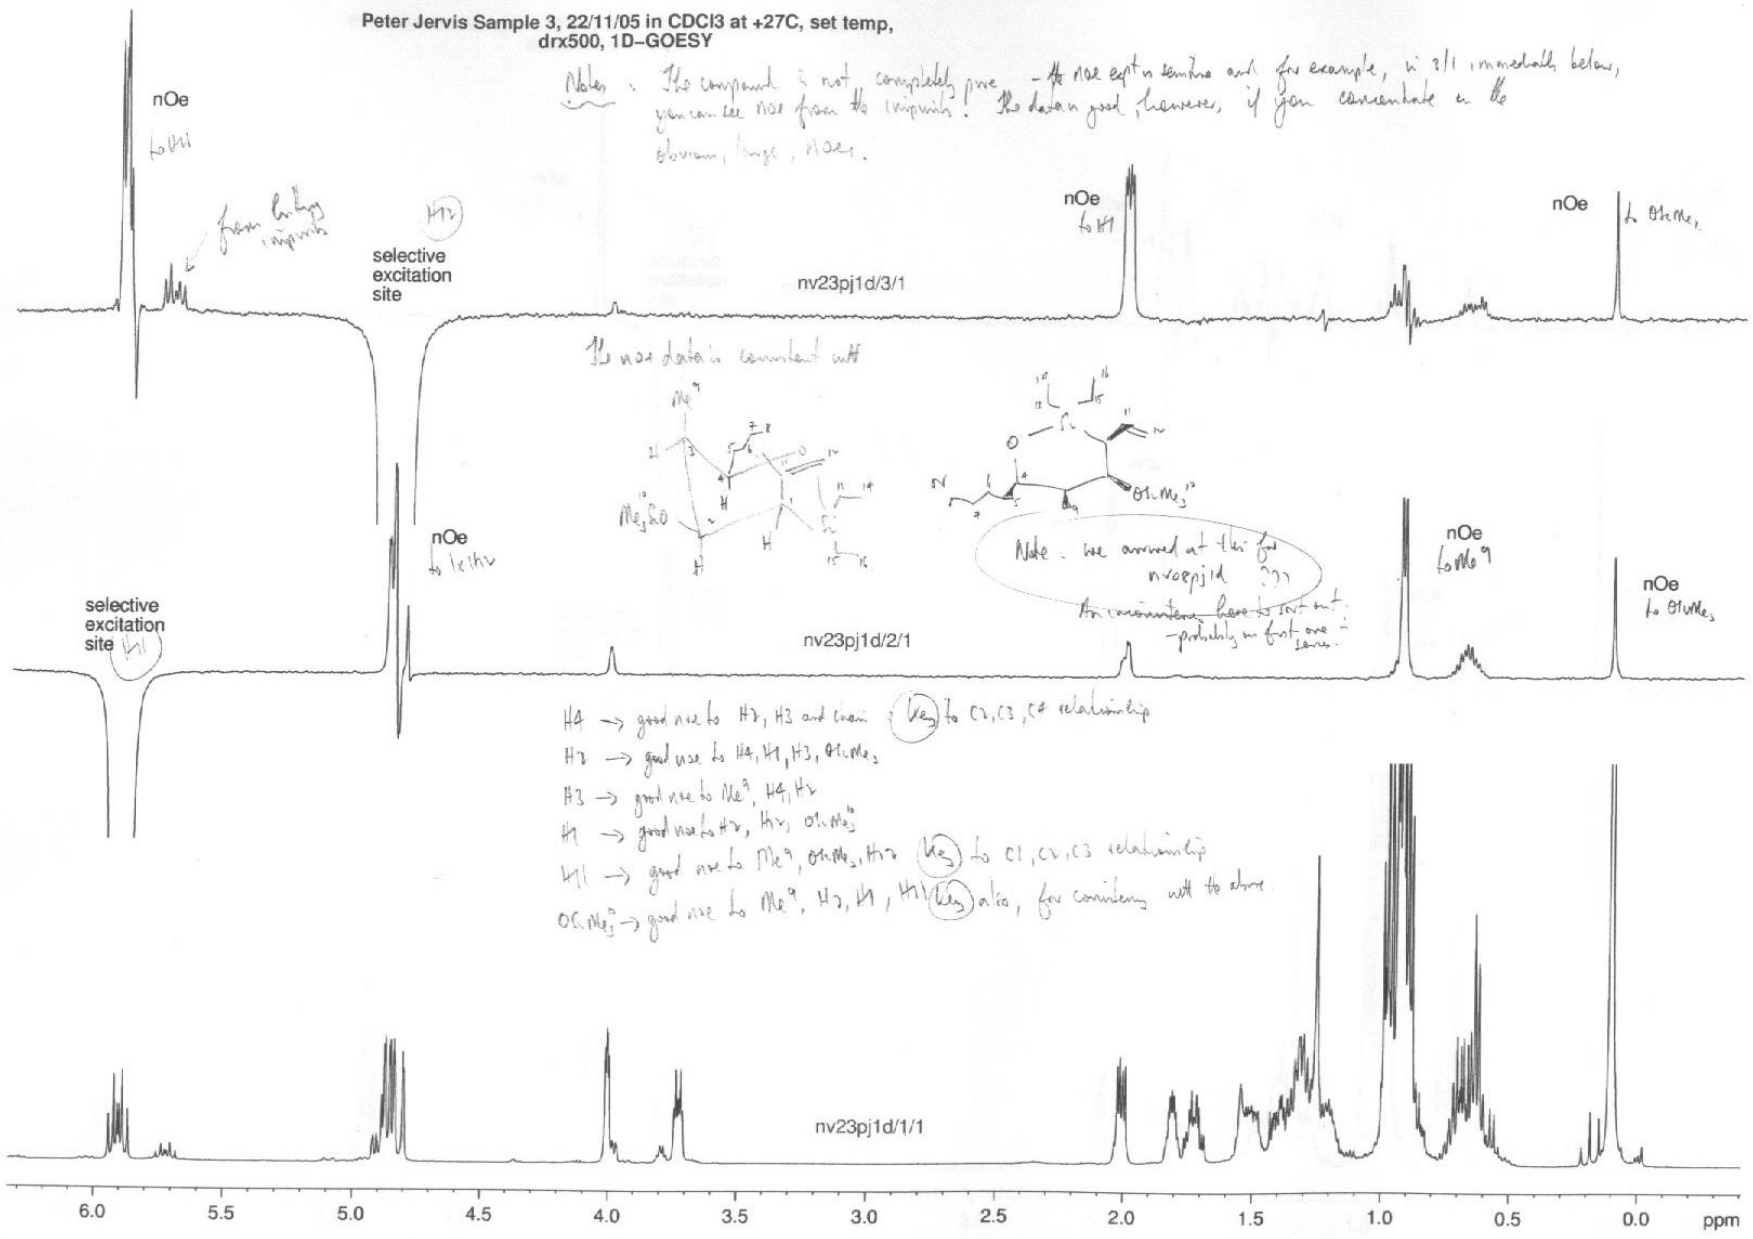

- H4 → good rise to H2, H3 and OMe12 (key) to C1, C3, C4 relationship
- H2 → good rise to H4, H1, H3, OMe12
- H3 → good rise to Me9, H4, H2
- H1 → good rise to H2, H3, OMe9
- H5 → good rise to Me9, OMe9, H2 (key) to C1, C3, C4 relationship
- OMe9 → good rise to Me9, H2, H1, H5 (key) also, for consistency with the above



Peter Jervis Sample 3, 22/11/05 in CDCl3 at +27C, set temp, drx500, 1D-GOESY

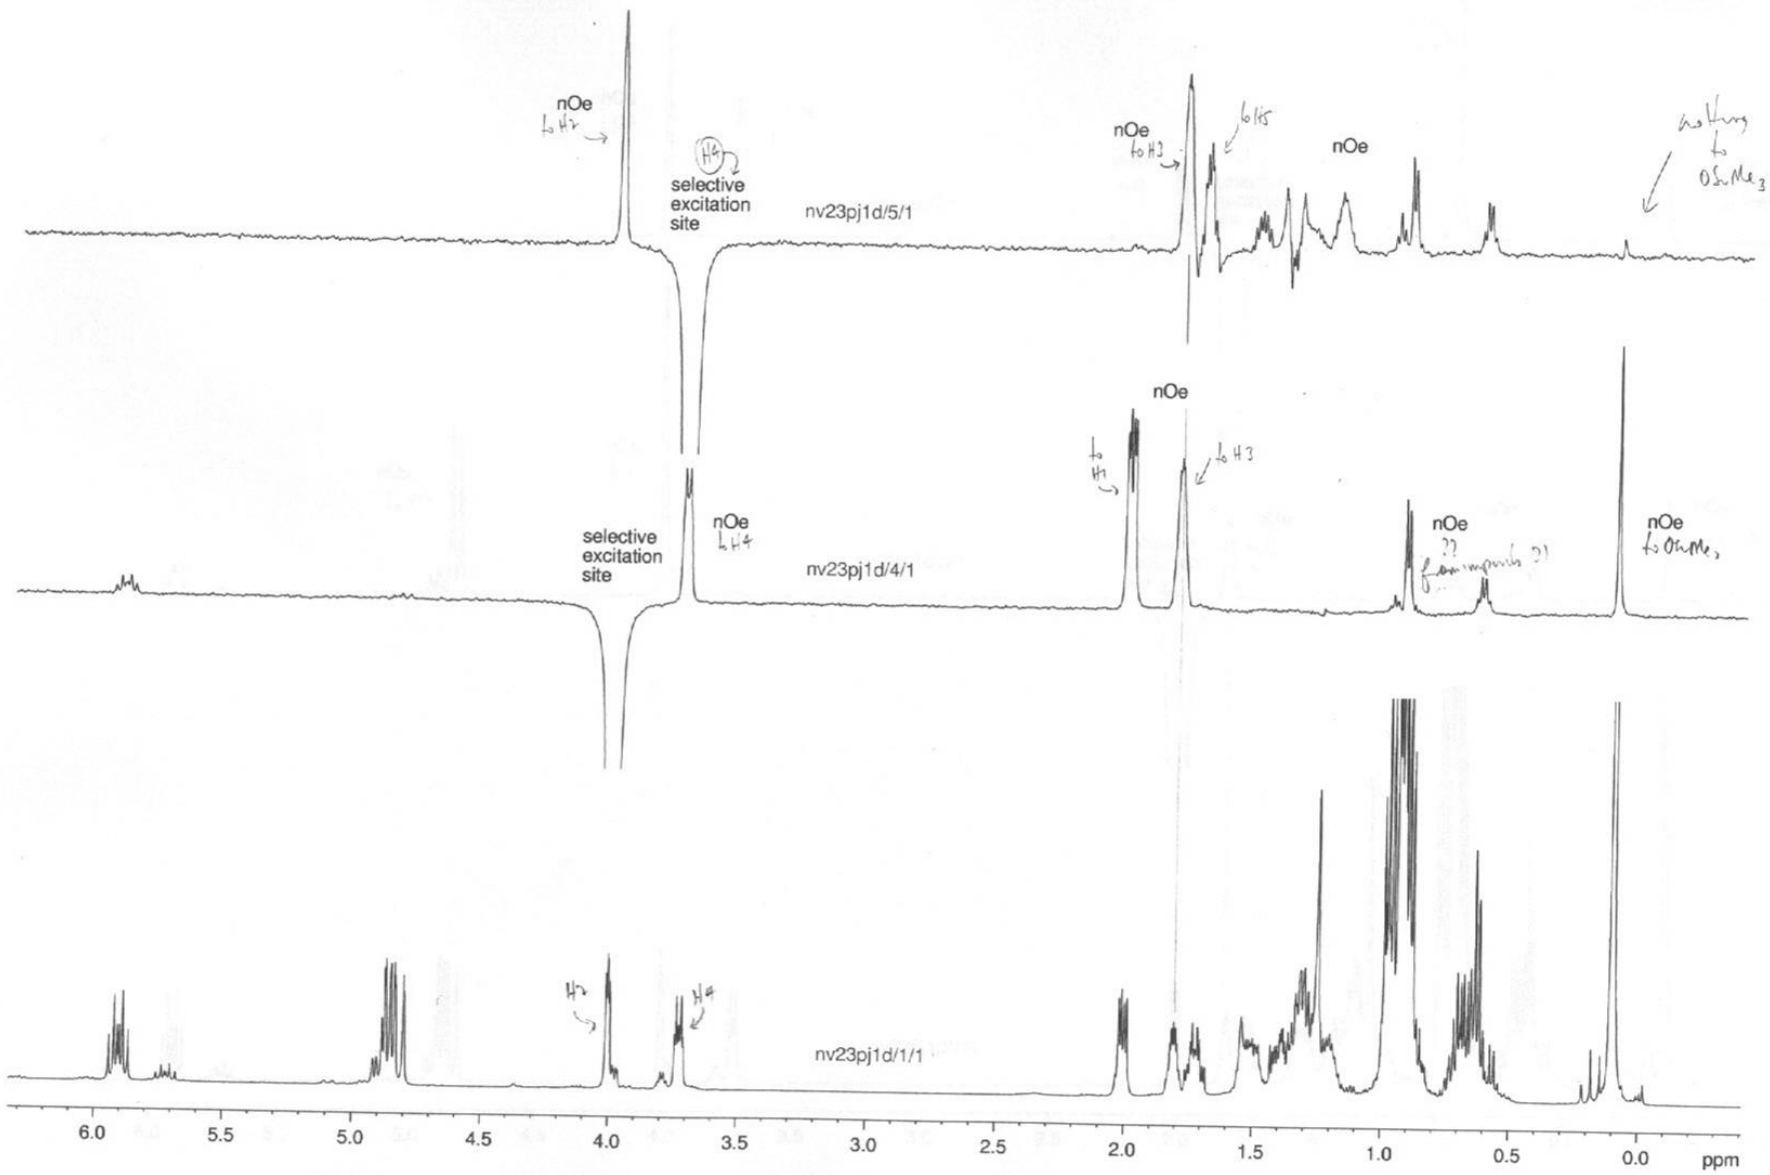

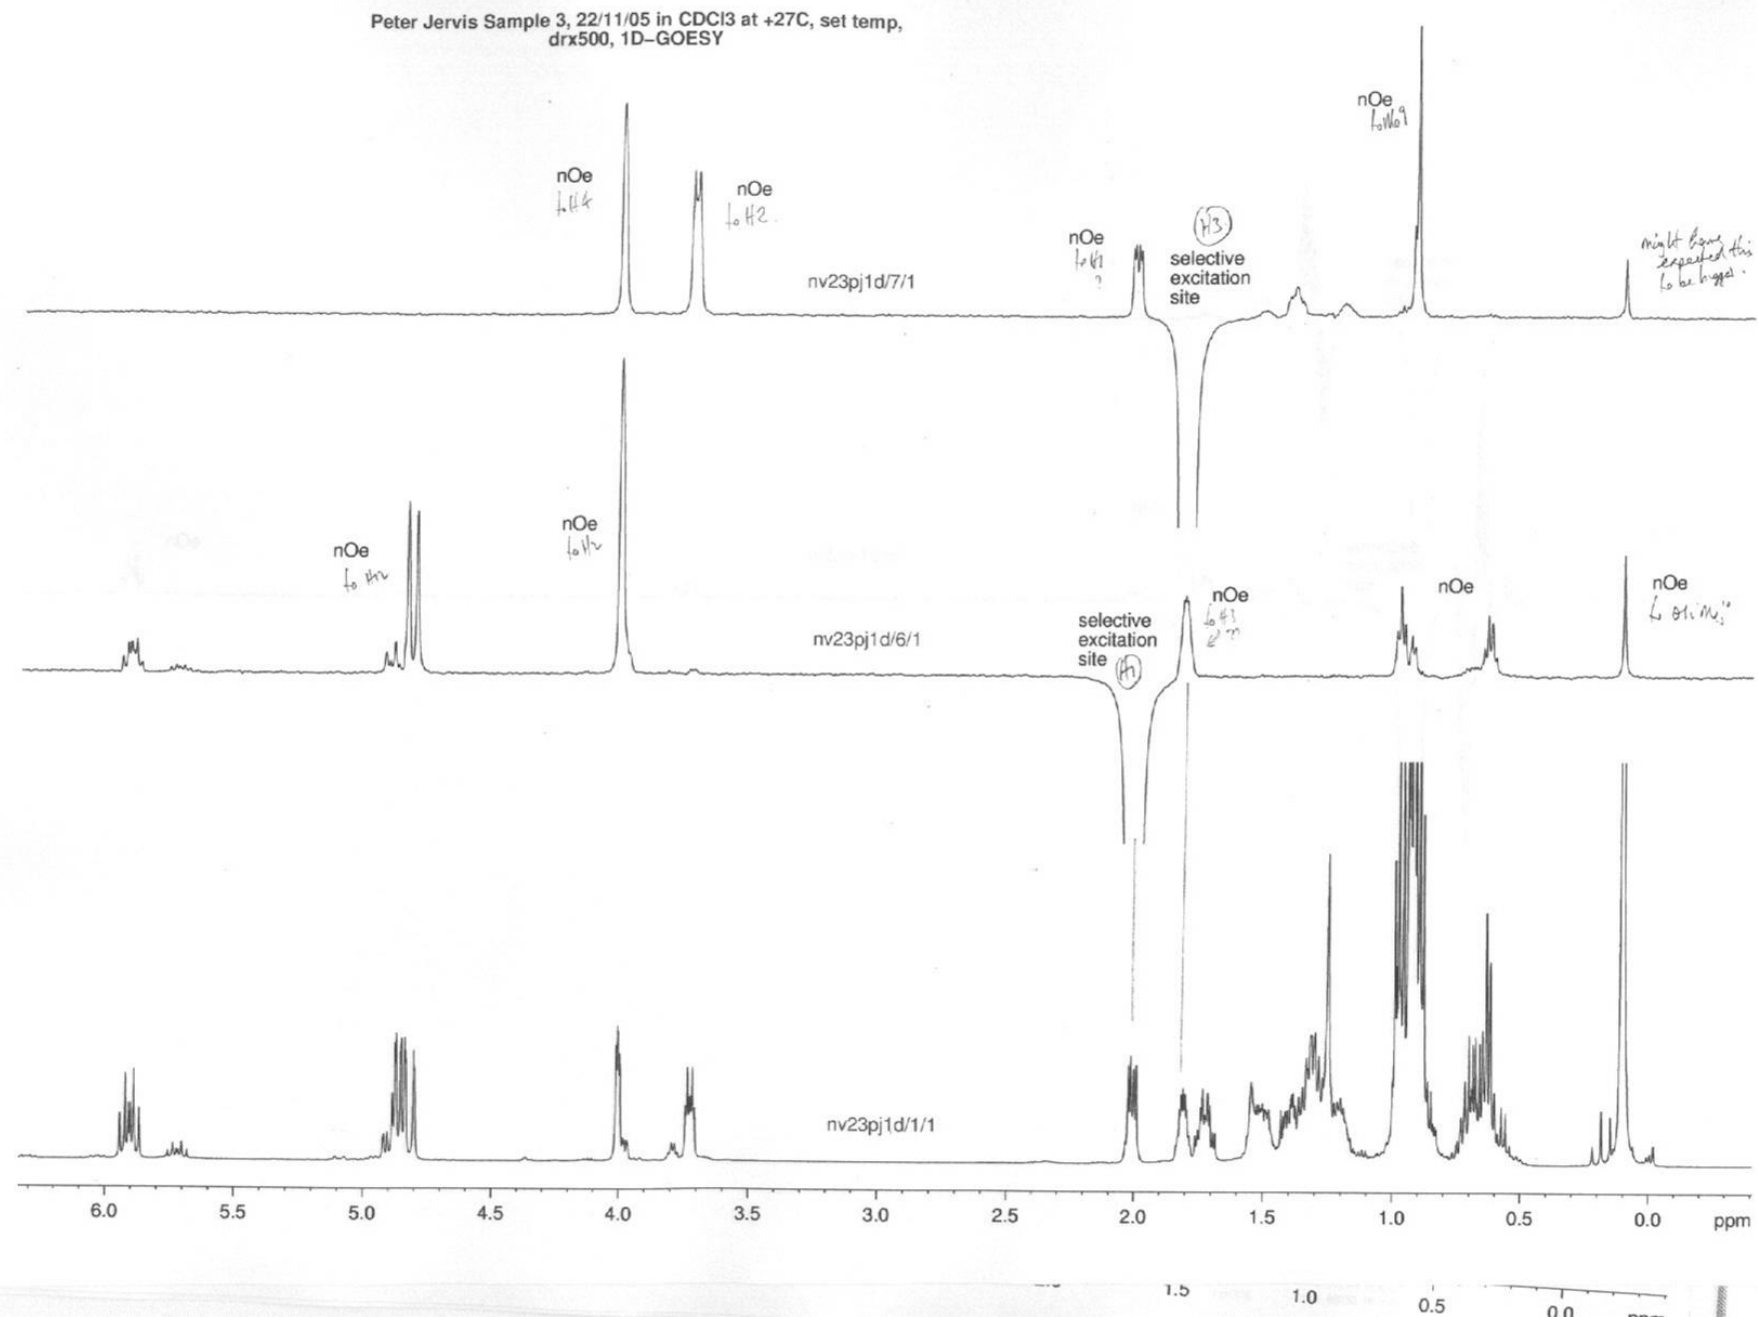

Peter Jervis Sample 3, 22/11/05 in CDCl<sub>3</sub> at +27C, set temp,  
drx500, 1D-GOESY

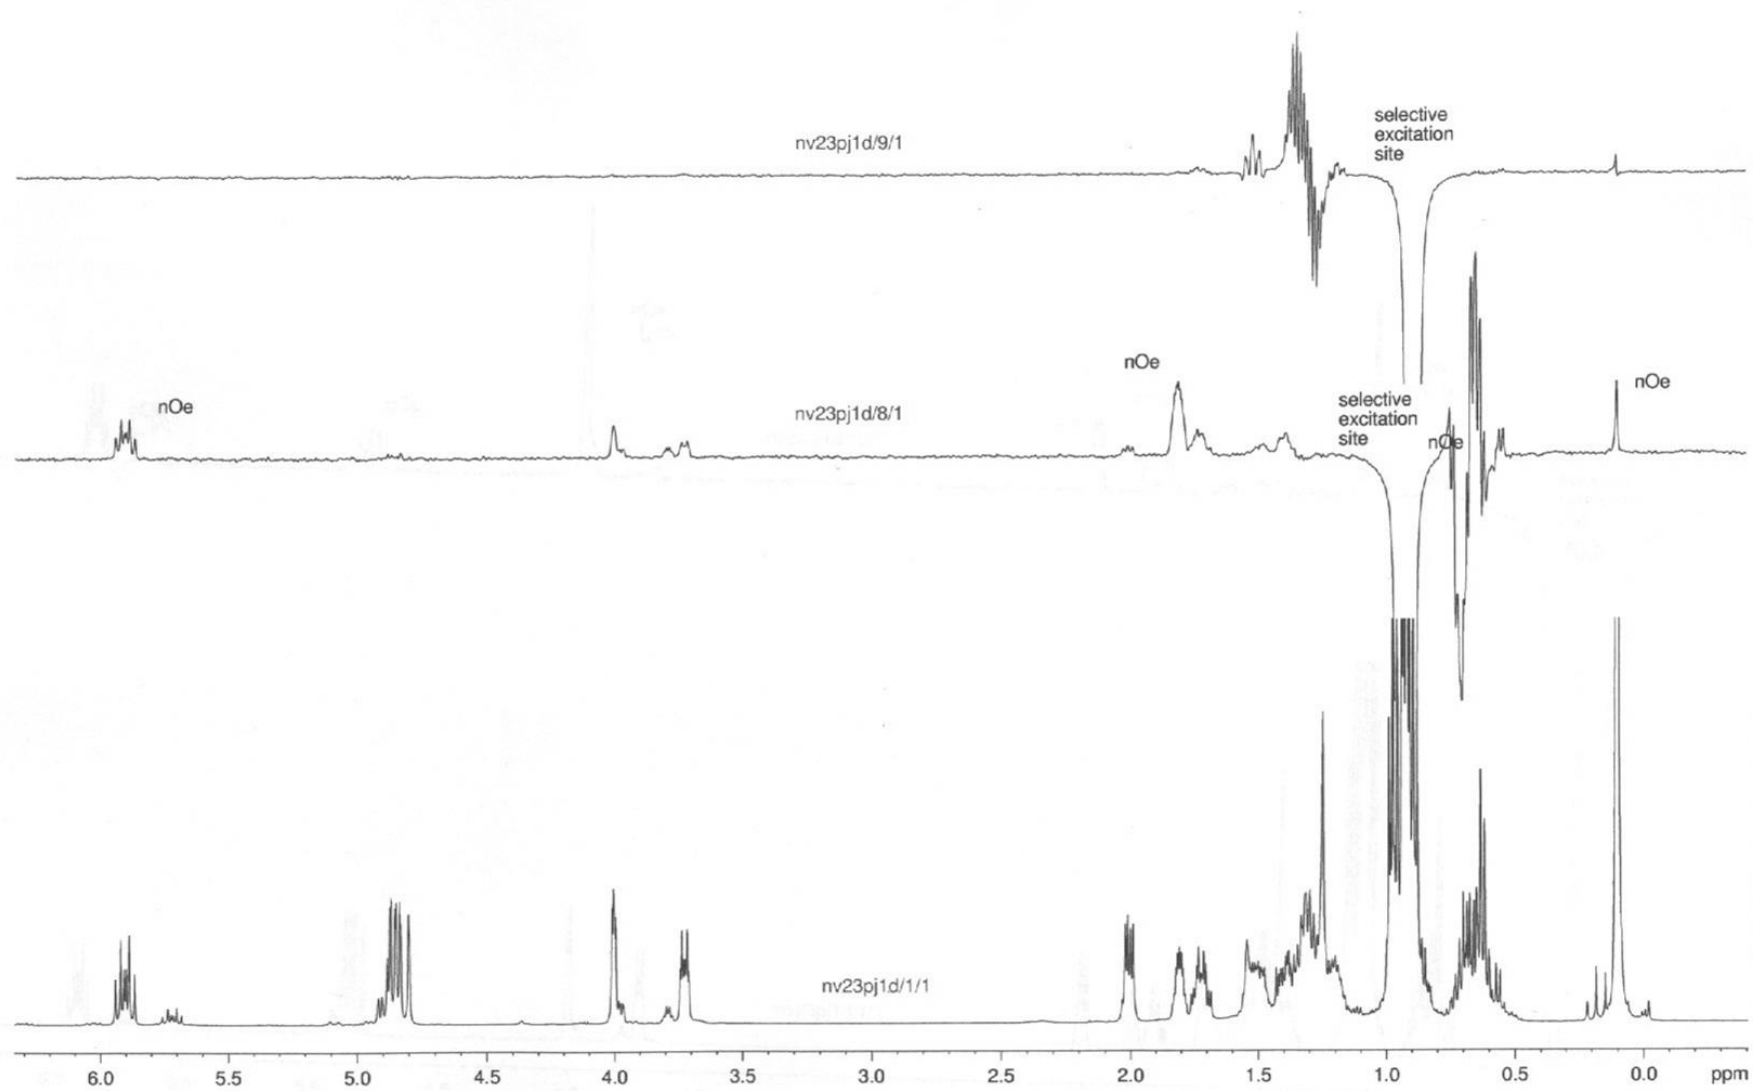

Peter Jervis Sample 3, 22/11/05 in CDCl<sub>3</sub> at +27C, set temp,  
drx500, 1D-GOESY

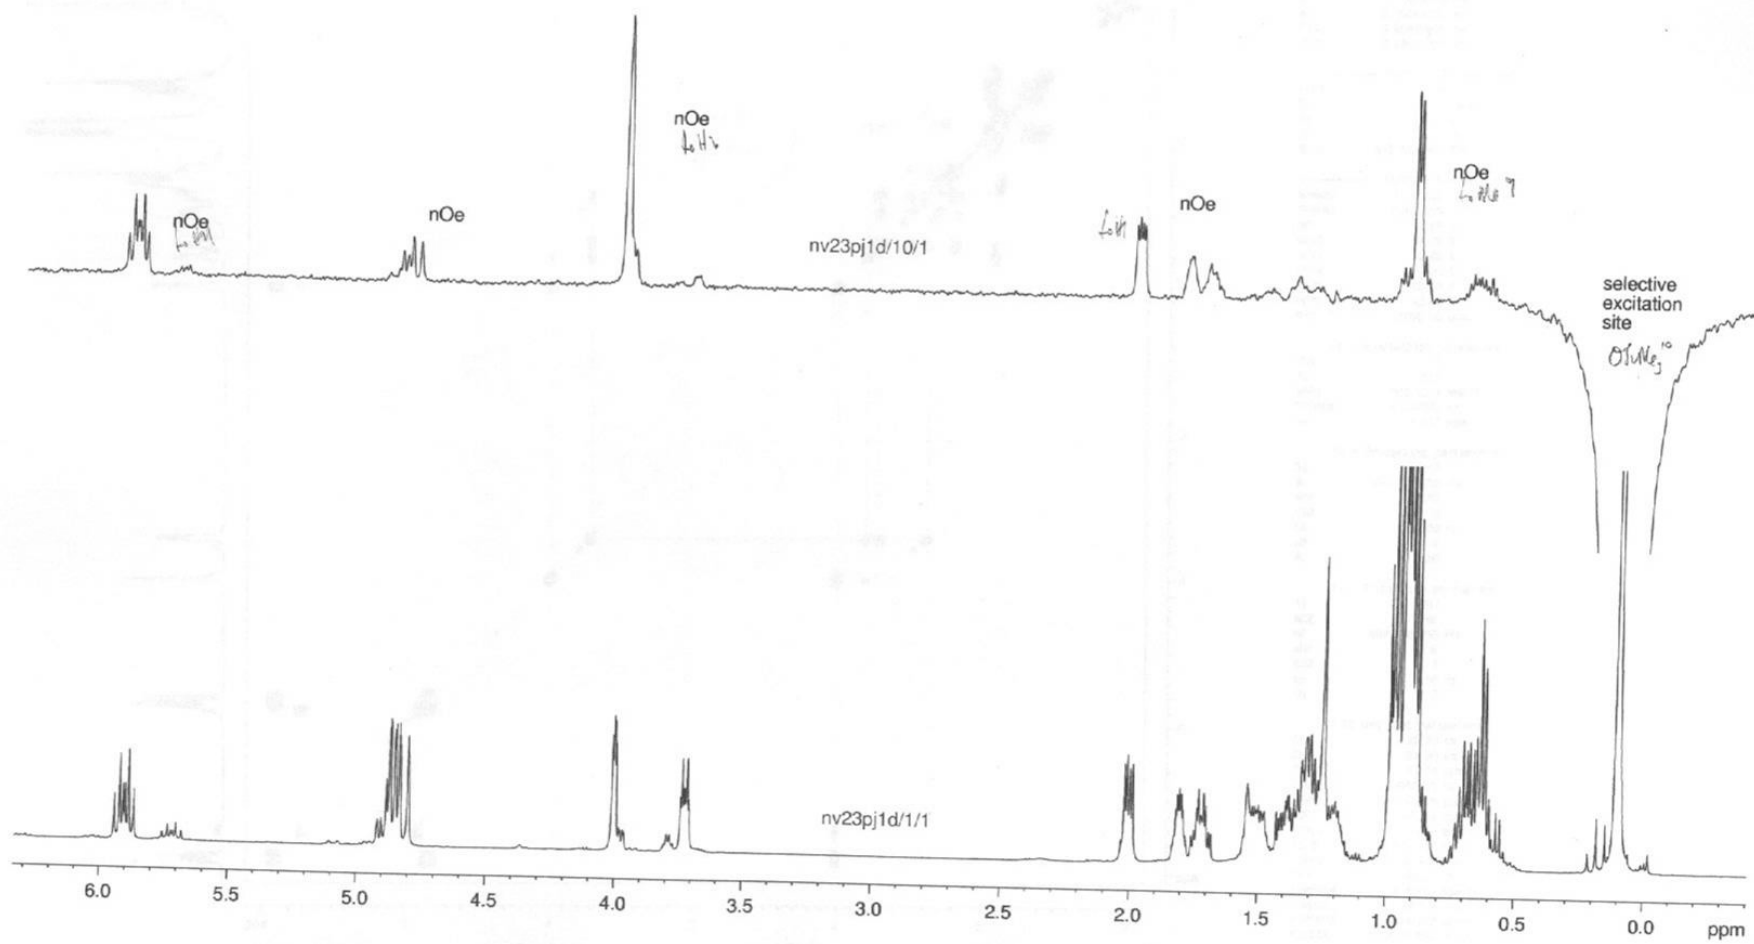

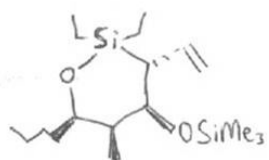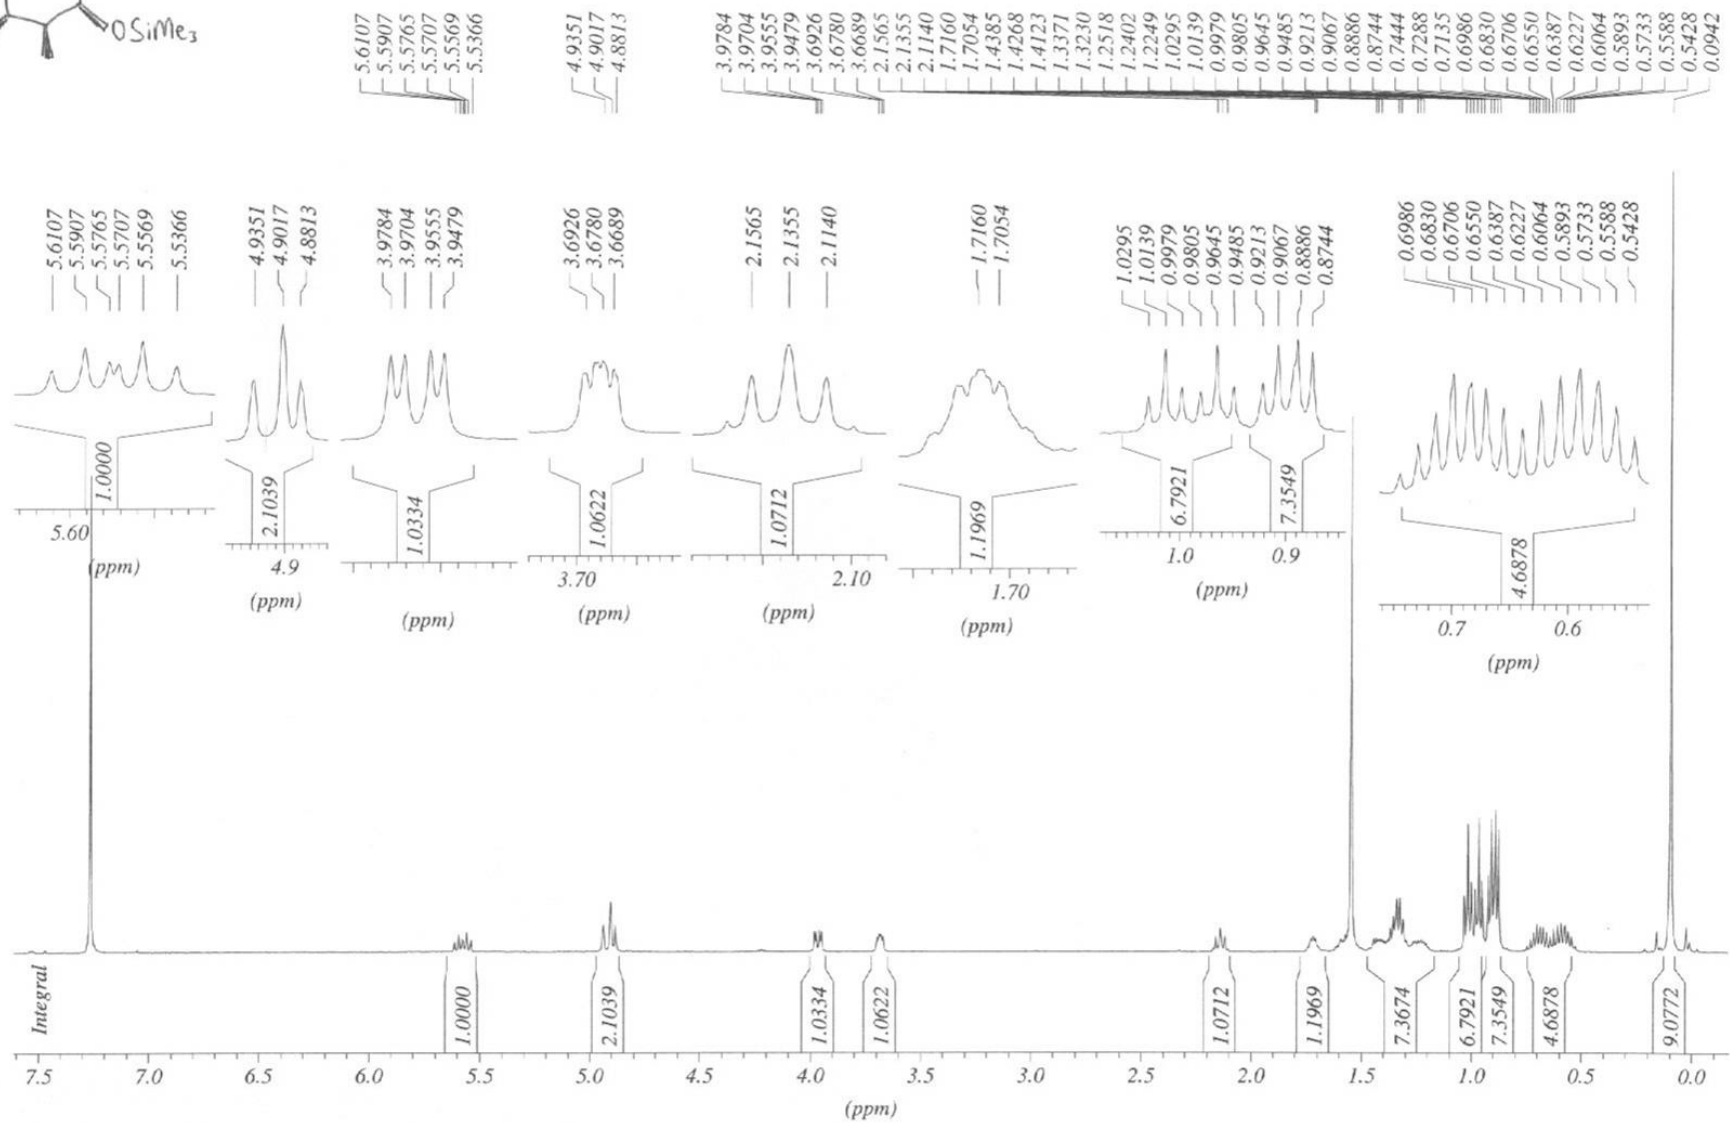

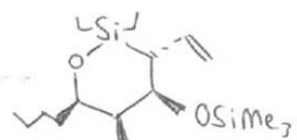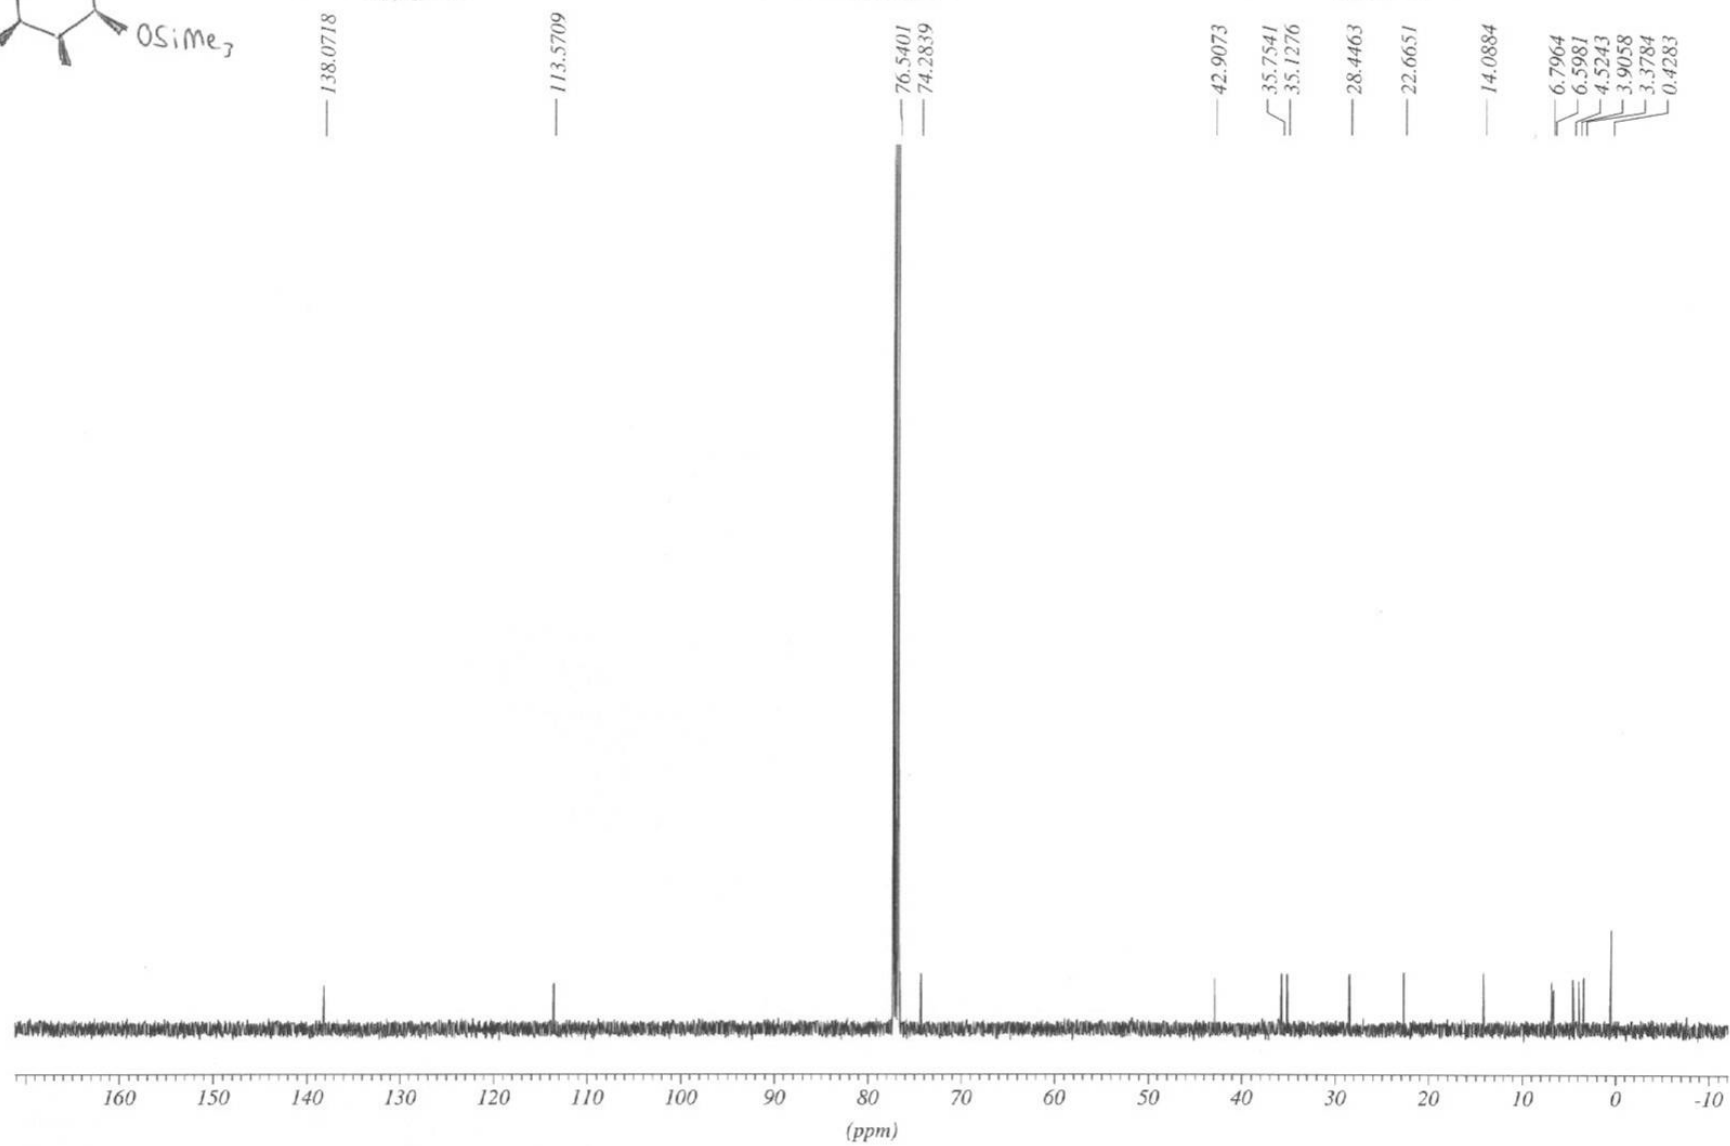

Peter Jarvis Sample 07/12/05 in CDCl<sub>3</sub> at +27C, set temp  
drx500, Gradient COSY90

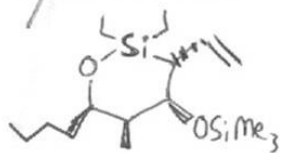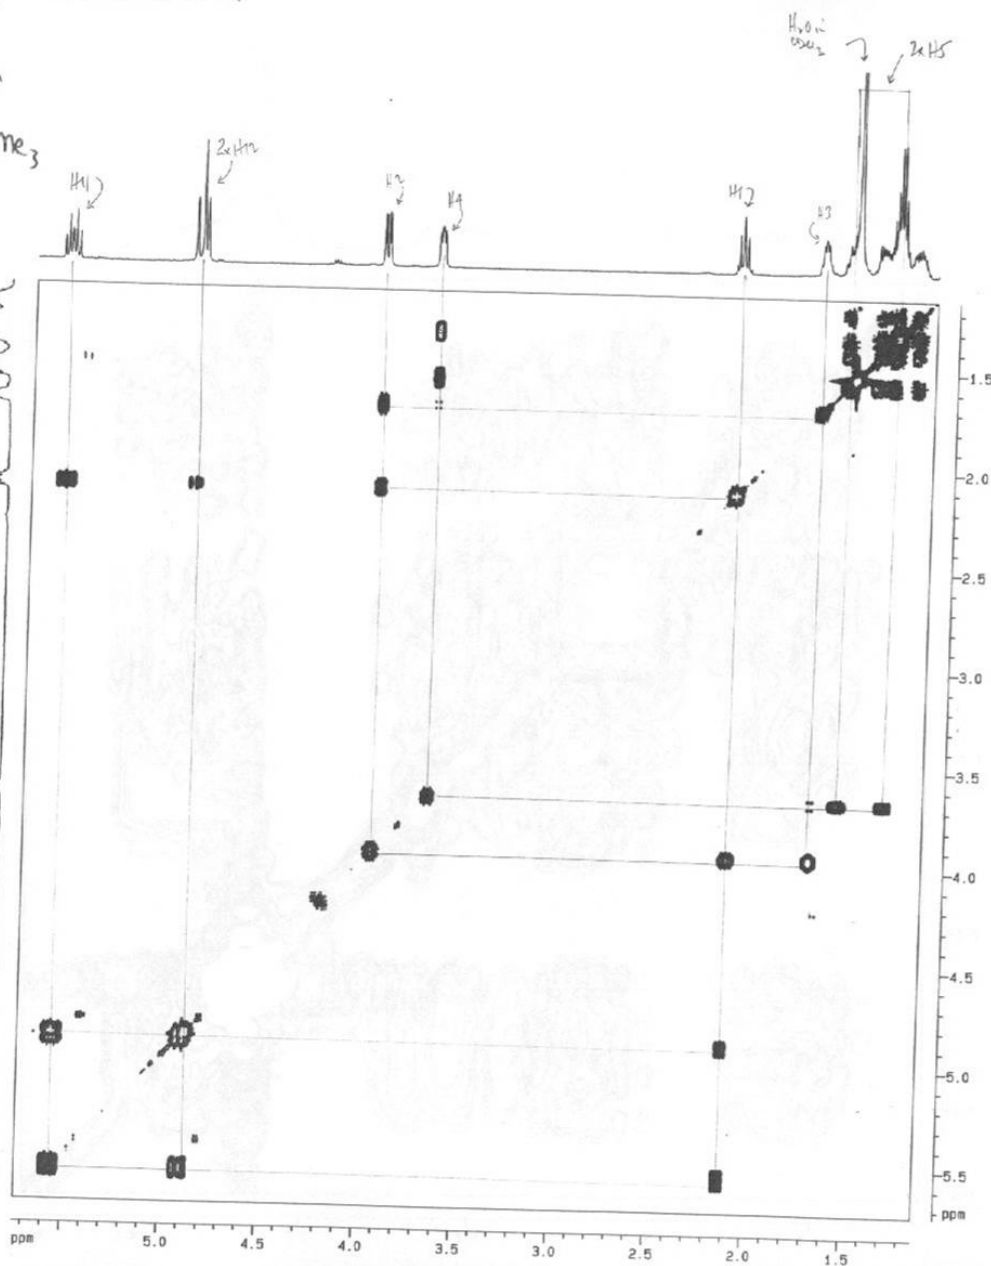

Current Data Parameters  
NAME dc07p1d  
EXPNO 2  
PROCNO 1

F2 - Acquisition Parameters  
Date\_ 20051207  
Time 12.06  
INSTRUM drx500  
PROBHD 5 mm TBI H/C  
PULPROG cosygp  
TD 2048  
SOLVENT CDCl<sub>3</sub>  
NS 8  
DS 16  
SMH 3415.301 Hz  
FIDRES 1.667927 Hz  
AQ 0.2998772 sec  
RG 812.7  
DM 146.400 usec  
DE 5.50 usec  
TE 300.0 K  
d0 0.00000300 sec  
D1 2.00000000 sec  
d13 0.00000300 sec  
D15 0.00010000 sec  
TNO 0.00025280 sec

CHANNEL f1  
NUC1 1H  
PO 10.70 usec  
P1 10.70 usec  
PL1 1.00 dB  
SF01 500.1322906 MHz

GRADIENT CHANNEL  
GPMAX1 SINE, 100  
GPMAX2 SINE, 100  
GFX1 0.00 %  
GFX2 0.00 %  
GFX3 0.00 %  
GFX4 0.00 %  
GFX5 0.00 %  
GFX6 10.00 %  
GFX7 10.00 %  
P16 1000.00 usec

F1 - Acquisition parameters  
ND0 1  
TD 512  
SF01 500.1323 MHz  
FIDRES 6.670609 Hz  
SK 6.829 ppm

F2 - Processing parameters  
SI 2048  
SF 500.1300236 MHz  
WDW SINE  
SSB 0  
LB 0.00 Hz  
GB 0  
PC 1.00

F1 - Processing parameters  
SI 1024  
MC2 OF  
SF 500.1300236 MHz  
WDW SINE  
SSB 0  
LB 0.00 Hz  
GB 0

2D NMR plot parameters  
CX2 20.00 cm  
CX1 20.00 cm  
F2PLD 5.740 ppm  
F2L0 2870.70 Hz  
F2PHI 1.126 ppm  
F2HI 562.71 Hz  
F1PLD 8.733 ppm  
F1L0 2867.37 Hz  
F1PHI 1.132 ppm  
F1HI 566.04 Hz  
F2PPMCH 0.23074 ppm/cm  
F2HZCH 115.39980 Hz/cm  
F1PPMCH 0.23007 ppm/cm

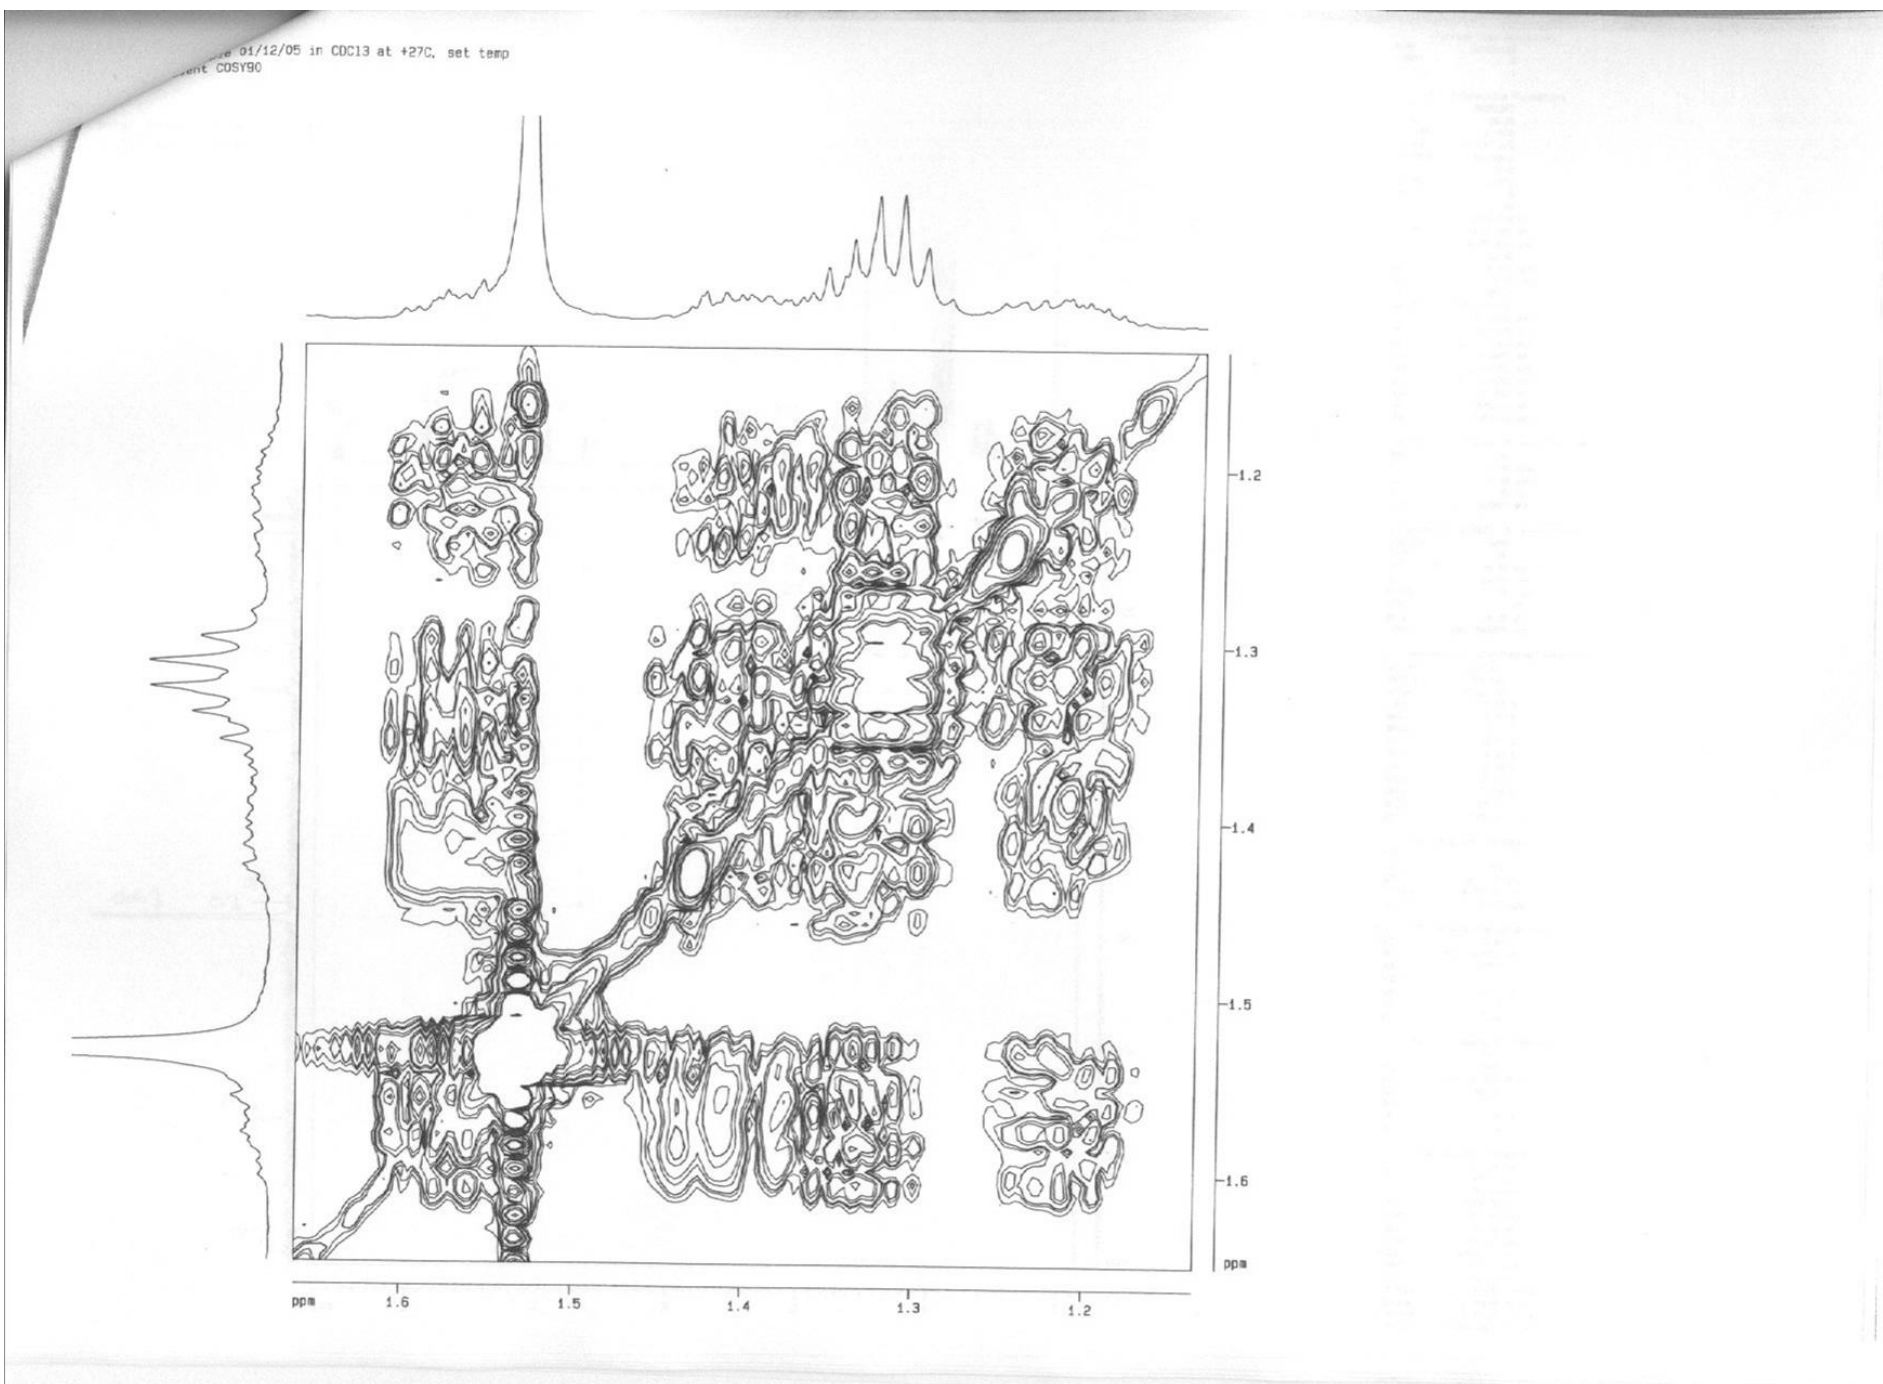



Peter Jervis Sample 07/12/05 in CDCl3 at +27C, set temp  
 drx500, Gradient HSGC

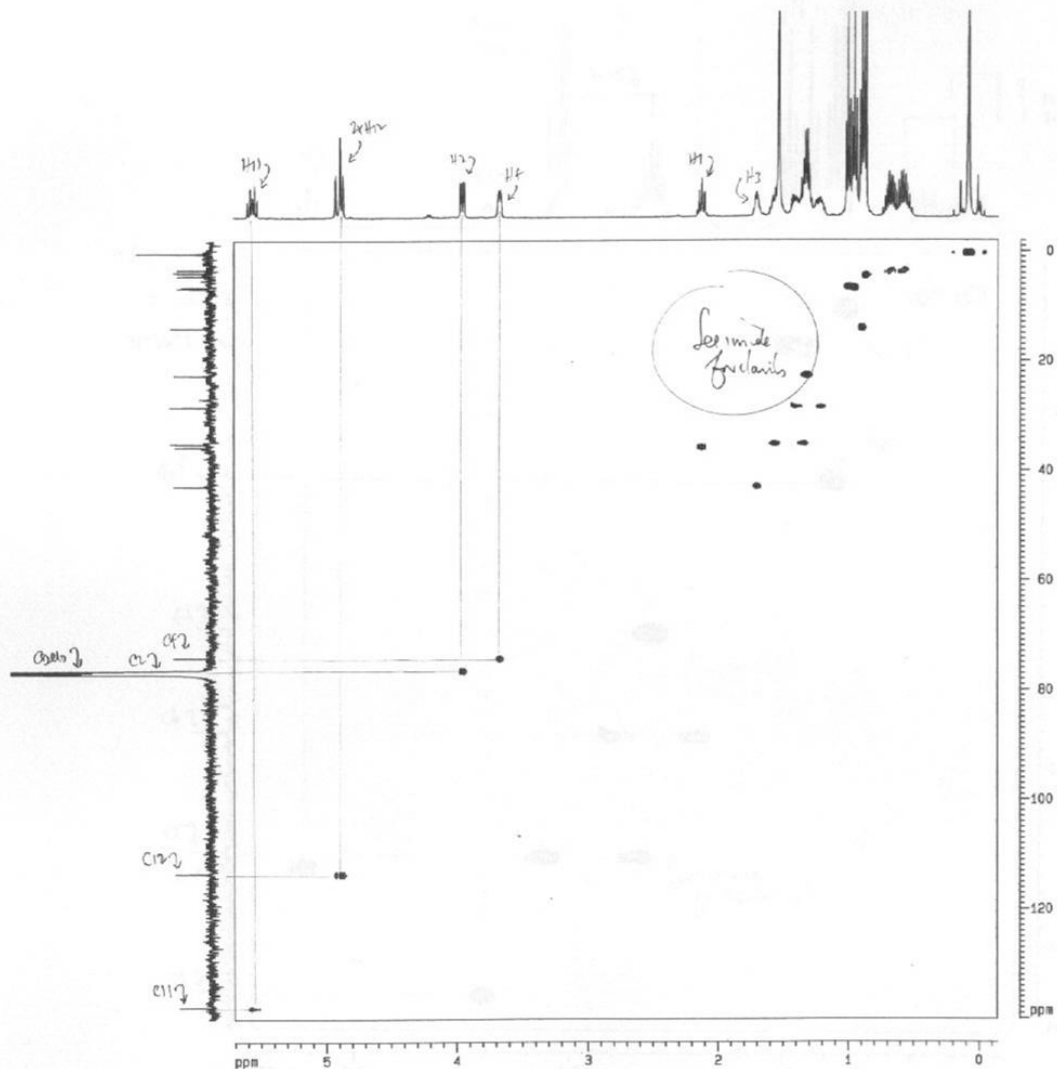

```

Current Data Parameters
NAME          oct07p10
EXPNO         3
PROCNO        1

F2 - Acquisition Parameters
Date_         20051207
Time          18.30
INSTRUM       spect
PROBHD        5 mm TBI H/C
PULPROG       invgptp
TD            2628
SOLVENT       CDCl3
NS            8
DS            16
SFO1          430.345 MHz
FIDRES        2.194581 Hz
AQ            0.2378180 sec
RG            30788
DM            118.000 usec
DE            5.50 usec
TE            300.2 K
CNET2         145.0000000
d0            0.0000300 sec
D1            2.0000000 sec
d4            0.0017045 sec
d11          0.0300000 sec
d13          0.0000300 sec
D18          0.0021000 sec
d20          0.0011000 sec
d21          0.00081714 sec
IN0           0.0008140 sec

----- CHANNEL f1 -----
NUC1          1H
P1            12.70 usec
p2            21.40 usec
PL1           1.00 dB
SFO1          500.1318867 MHz

----- CHANNEL f2 -----
CPROG2        gprp
NUC2          13C
P3            12.00 usec
p4            24.50 usec
PCPRO2        78.00 usec
PL2           -1.00 dB
PL12          15.00 dB
SFO2          125.7687853 MHz

----- GRADIENT CHANNEL -----
GPRAM1        SINE.100
GPRAM2        SINE.100
GPRAM3        SINE.100
GPR1          0.00 %
GPR2          0.00 %
GPR3          0.00 %
GPR4          0.00 %
GPR5          0.00 %
GPR6          0.00 %
GPR7          80.00 %
GPR8          30.00 %
GPR9          20.10 %
P18           1000.00 usec

F1 - Acquisition parameters
ND0           4
TD            512
SFO1          125.7688 MHz
FIDRES        42.831888 Hz
SN            174.369 ppm

F2 - Processing parameters
SI            32768
SF            500.1300233 MHz
WDW           GB2
SSB           2
LB            0.00 Hz
GB            0
PC            1.00

F1 - Processing parameters
SI            1024
NUC1          13C
P1            1991
SF            125.7677510 MHz
WDW           GB2
SSB           2
LB            0.00 Hz
GB            0

2D HMQC plot parameters
CQ1           17.00 cm
CQ2           17.00 cm
F2PL0         5.700 ppm
F2L0          2894.70 Hz
F2PHI         -0.141 ppm
F2K1          -70.75 Hz
F1PL0         140.182 ppm
F1L0          17620.92 Hz
F1PHI         -2.014 ppm
F1SHI         -253.34 Hz
F2FPCMH       0.34460 ppm/cm
F2H2CMH       172.08684 Hz/cm
F1FPCMH       0.30440 ppm/cm
F1H2CMH       1051.86987 Hz/cm
  
```

Peter Jarvis Sample 07/12/05 in CDCl3 at +27C, set temp  
drx500, Gradient HSQC

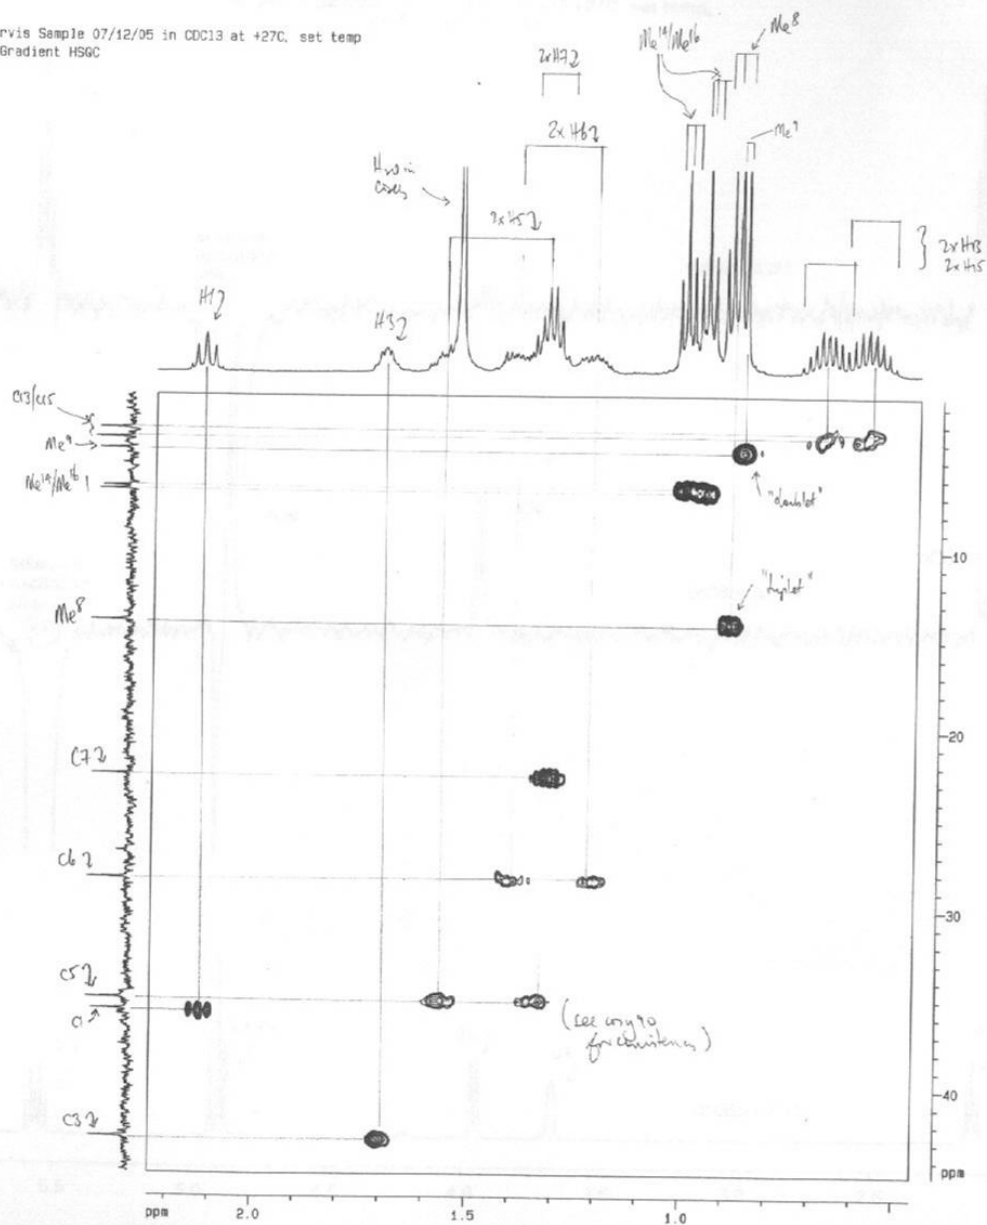

Peter Jervis Sample 07/12/05 in CDCl<sub>3</sub> at +27°C, set temp,  
drx500, 1D-GOESY

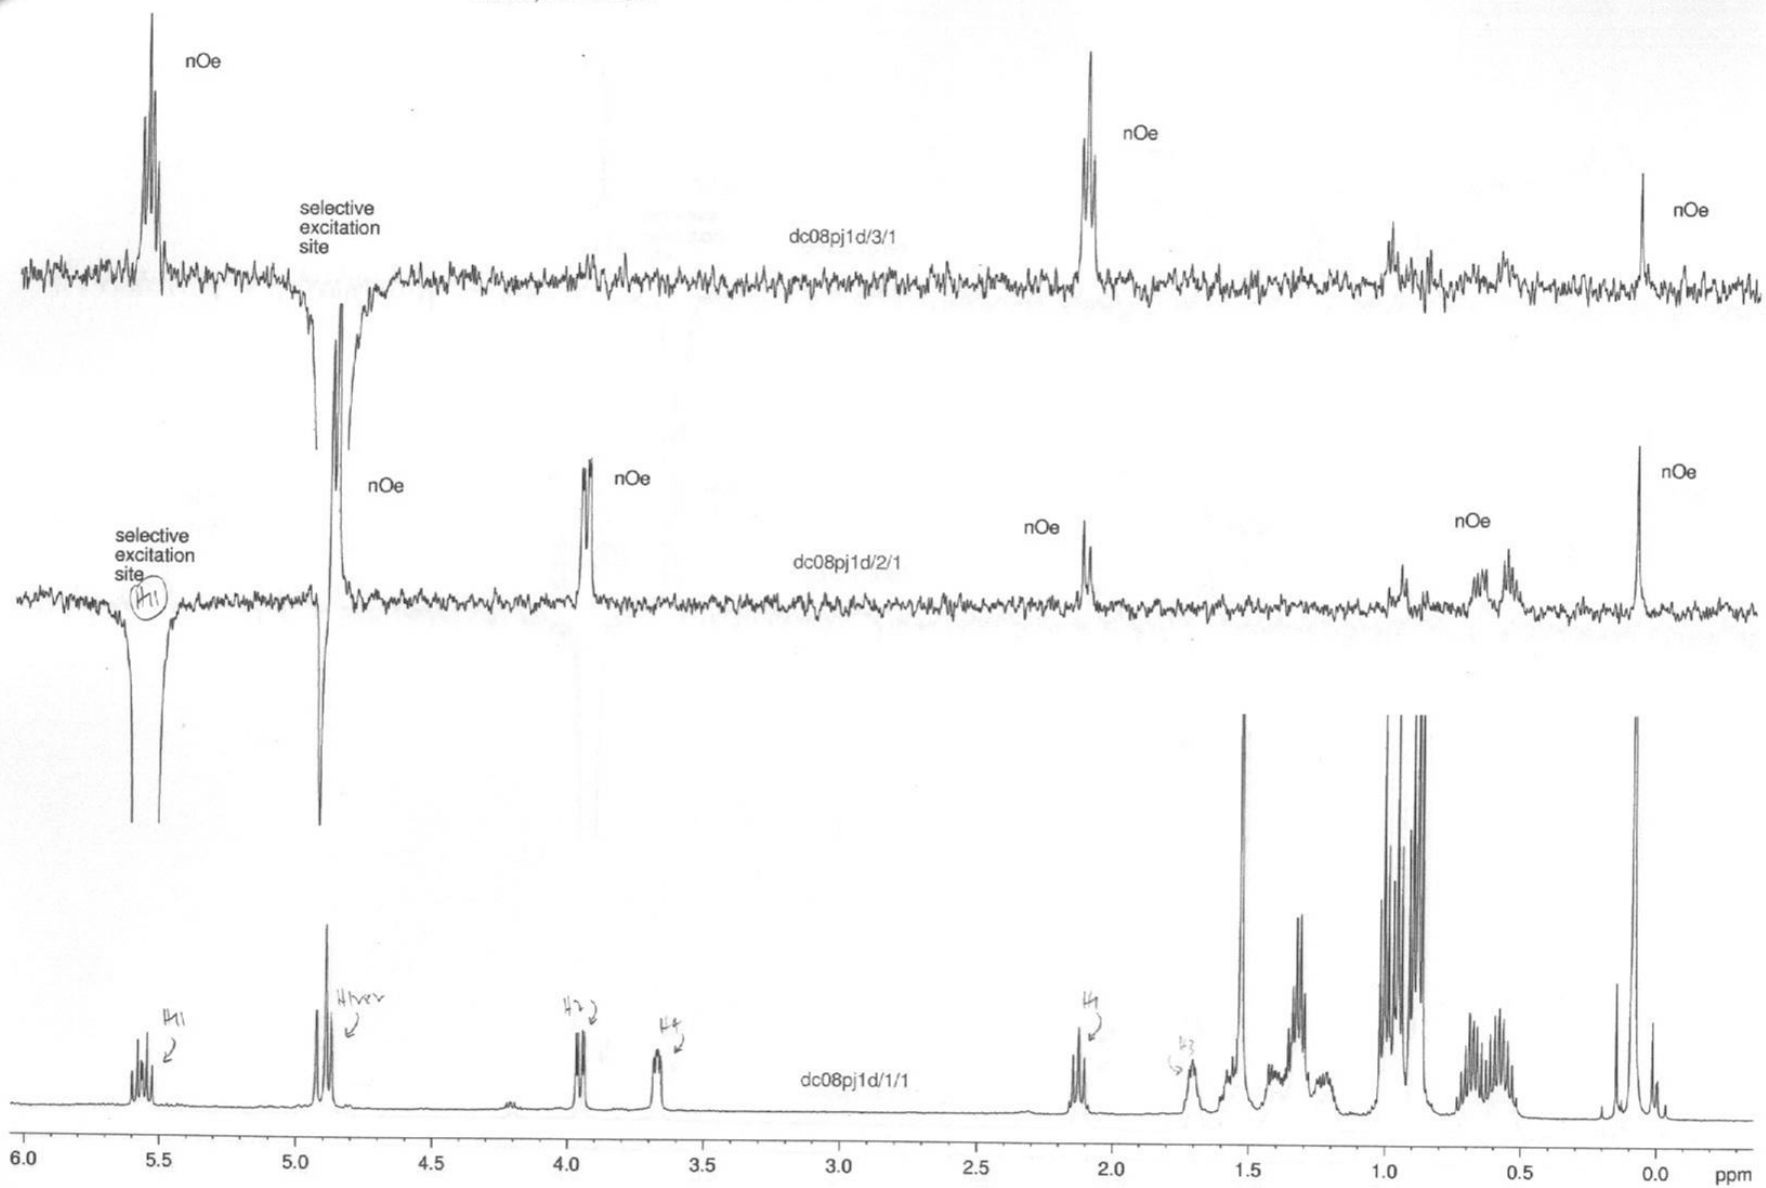

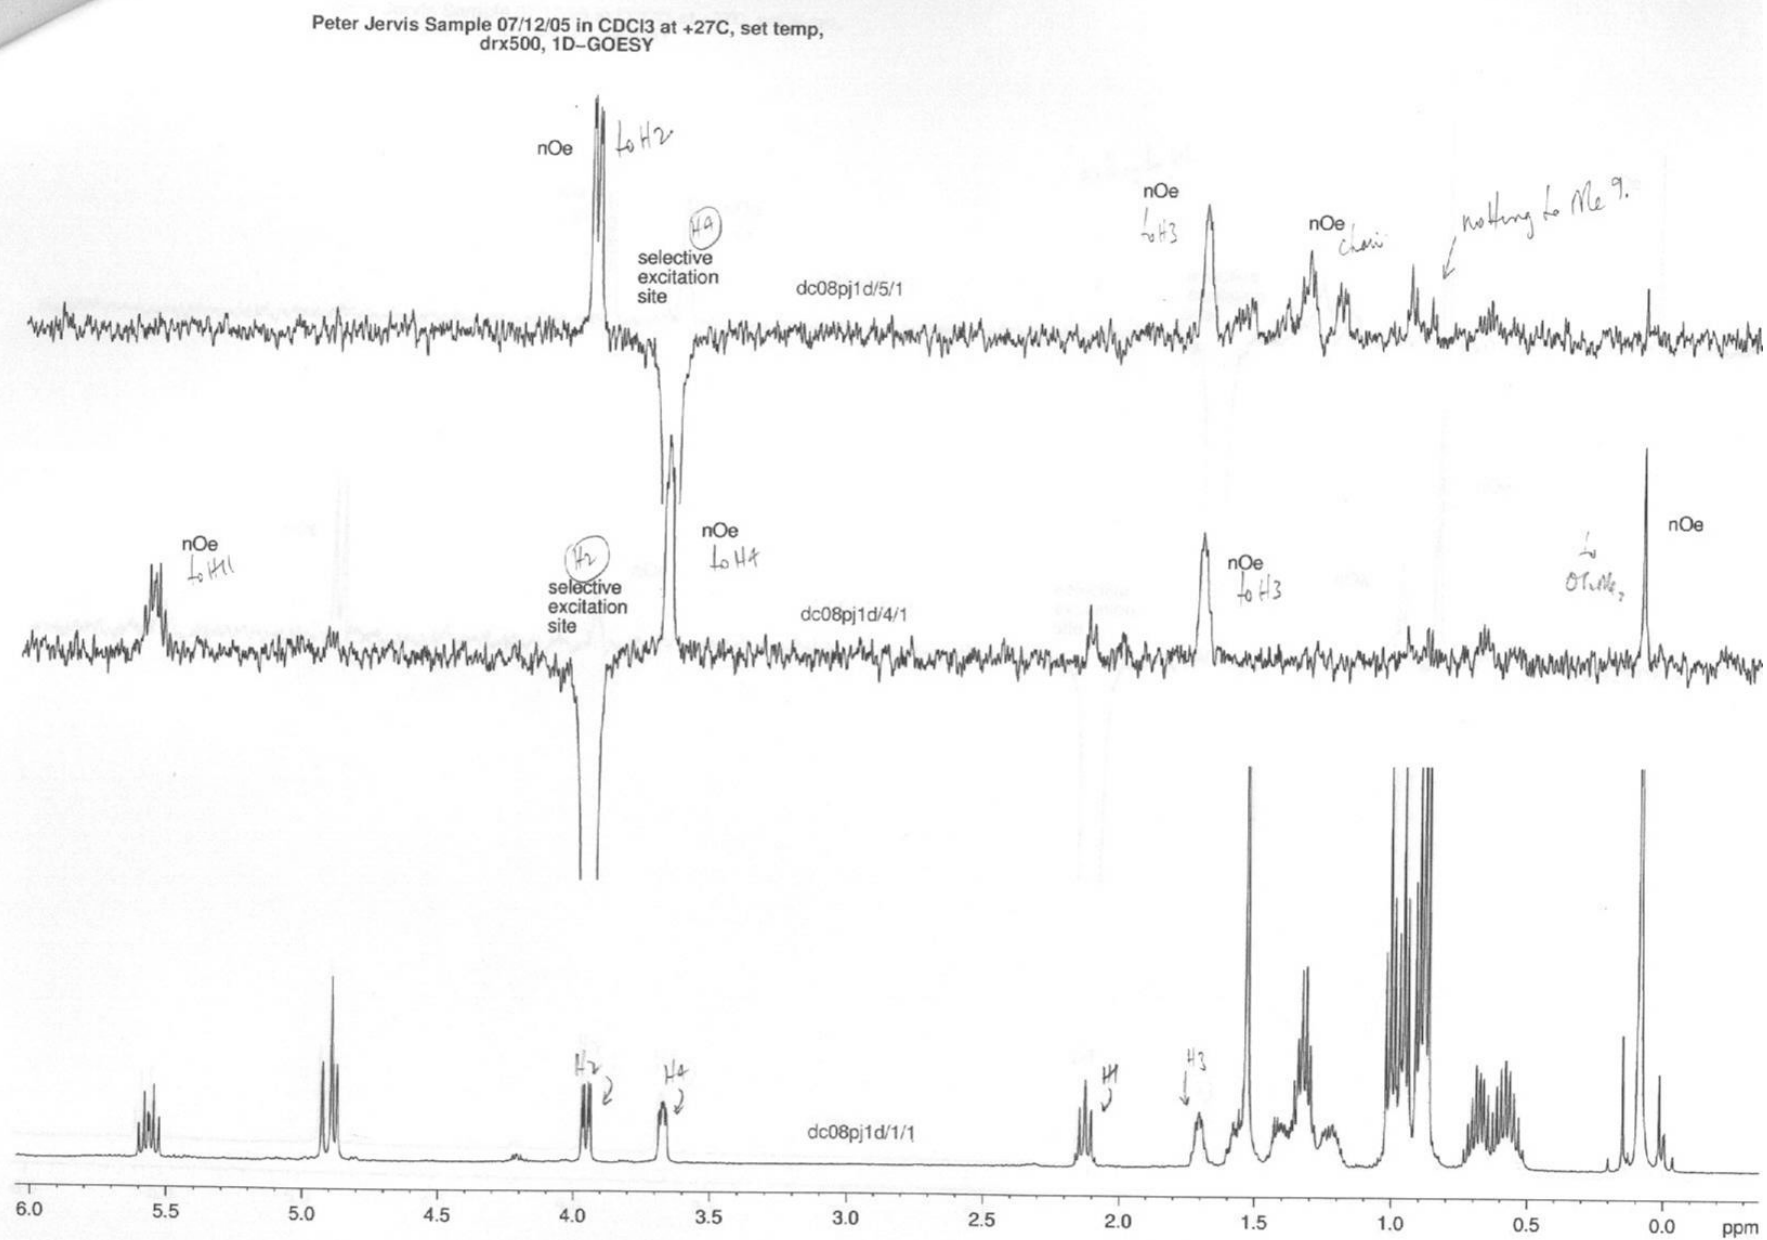

Peter Jervis Sample 07/12/05 in CDCl3 at +27C, set temp,  
drx500, 1D-GOESY

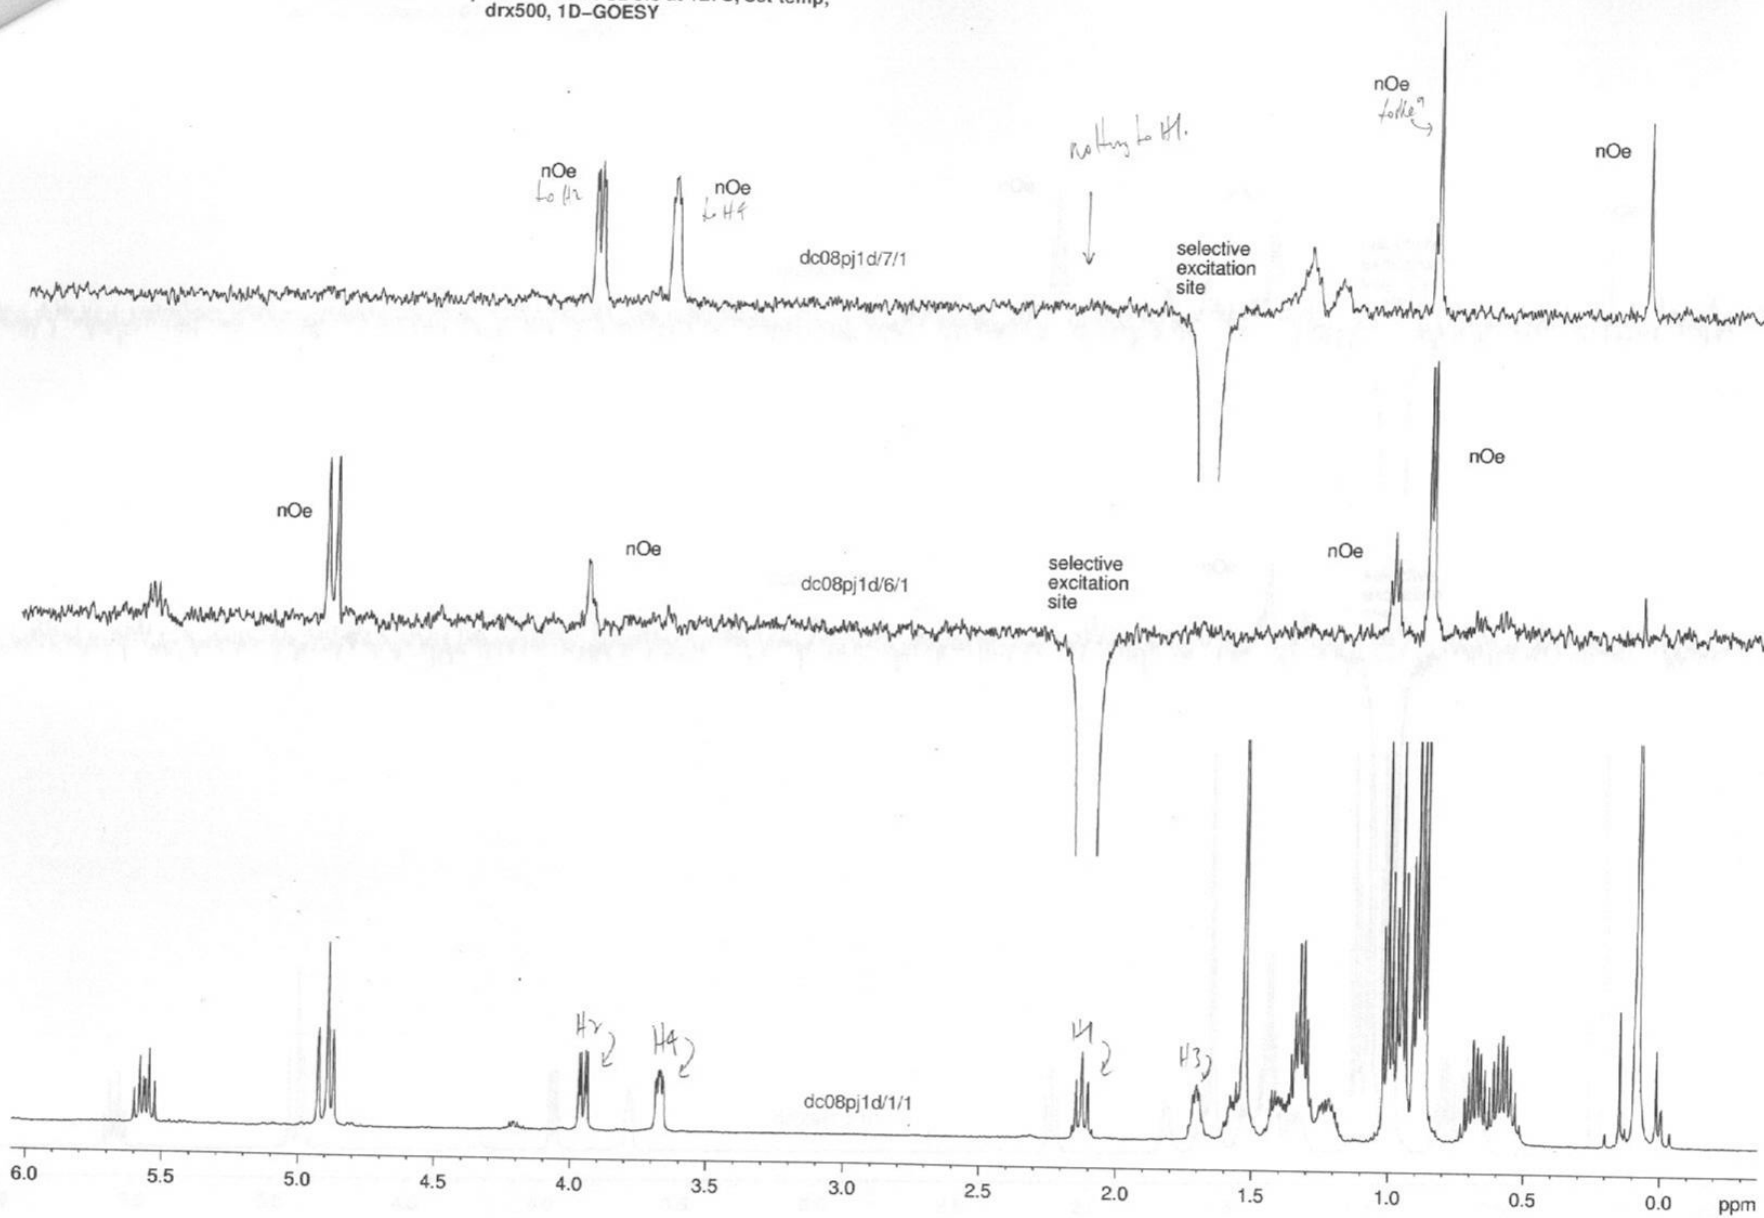

Peter Jervis Sample 07/12/05 in CDCl3 at +27C, set temp,  
drx500, 1D-GOESY

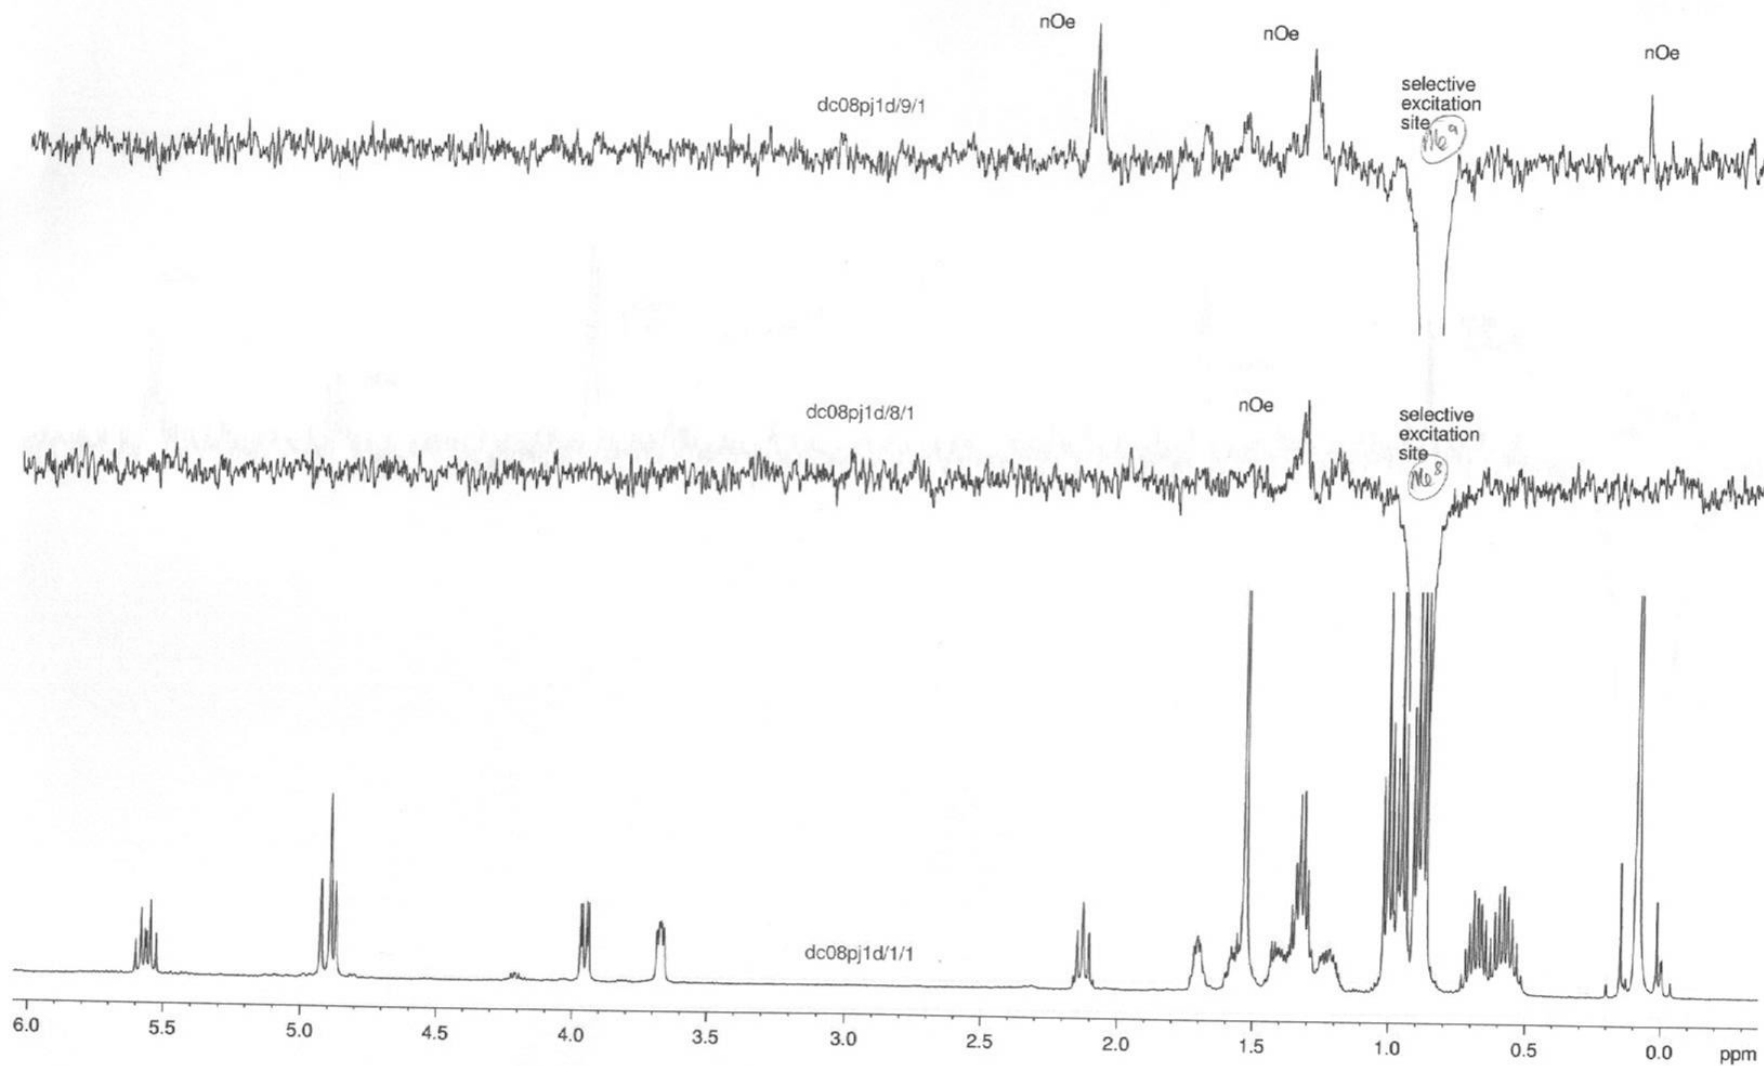

Peter Jervis Sample 07/12/05 in CDCl<sub>3</sub> at +27°C, set temp,  
drx500, 1D-GOESY

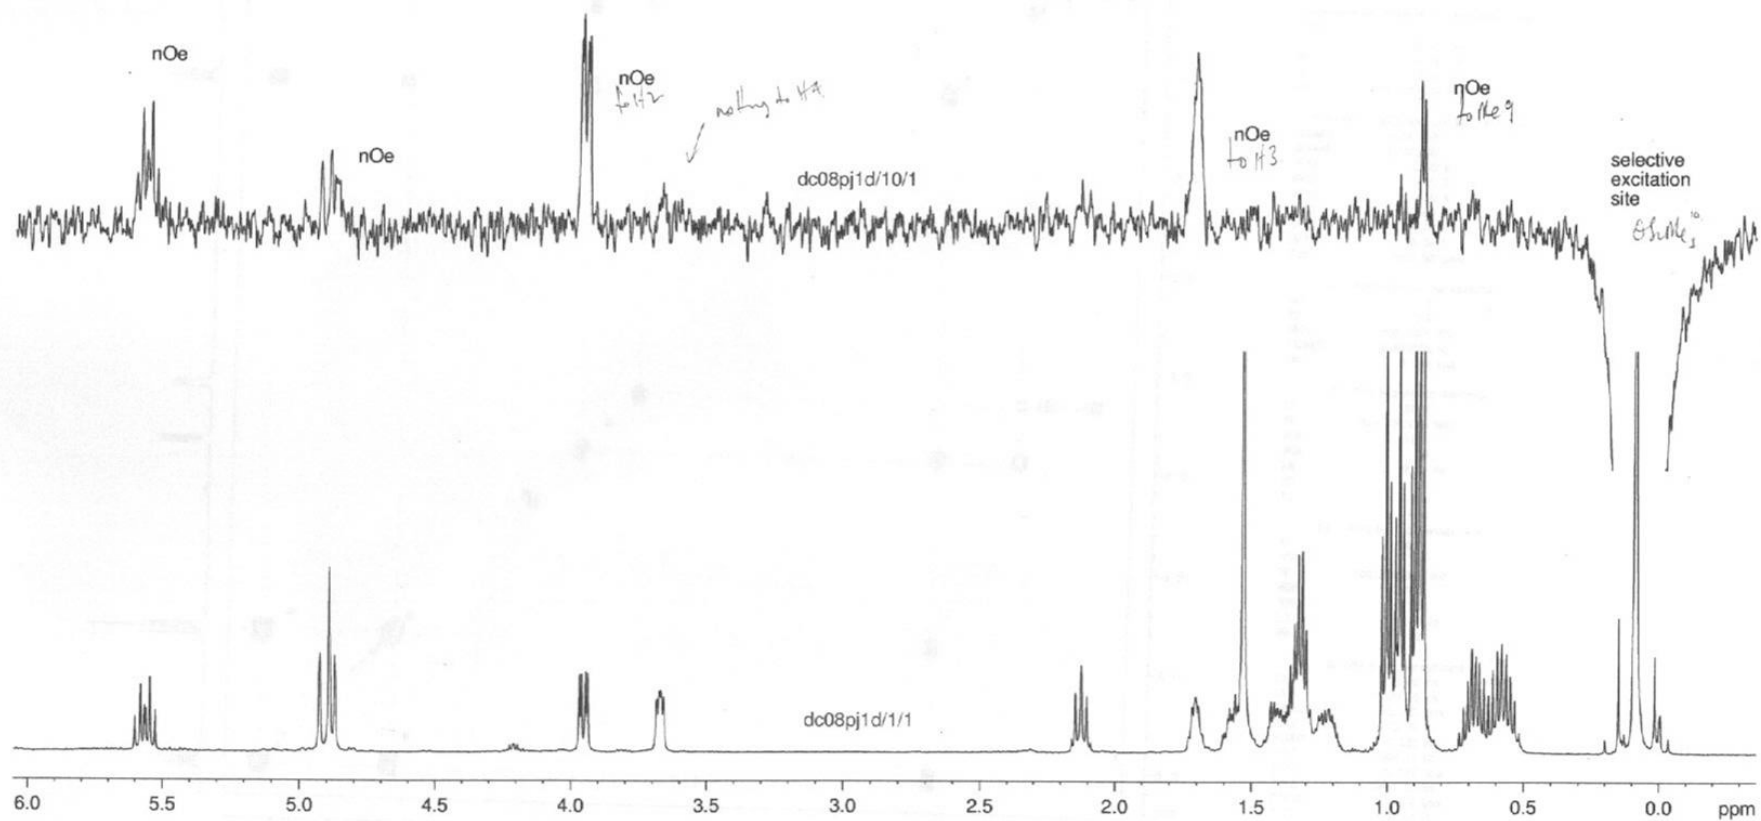

Supplement: Beilstein_J_Org_Chem-03-06-s004.pdf [file Beilstein_J_Org_Chem-03-06-s004.pdf]
