# Supplementary material for: Tether-directed synthesis of highly substituted oxasilacycles via an intramolecular allylation employing allylsilanes
Source: PubMed Central journal article supplement (PMC1810303; doi:10.1186/1860-5397-3-6), 2007-02-08

## Additional File 6

**Tether-directed synthesis of highly substituted oxasilacycles *via* an intramolecular allylation employing allylsilanes**

Peter J. Jervis and Liam R. Cox\*

email: l.r.cox@bham.ac.uk

**$^1\text{H-NMR}$  and  $^{13}\text{C-NMR}$  Spectra for the following compounds:**

**16b, 17b**

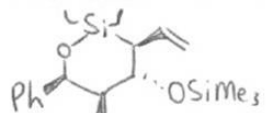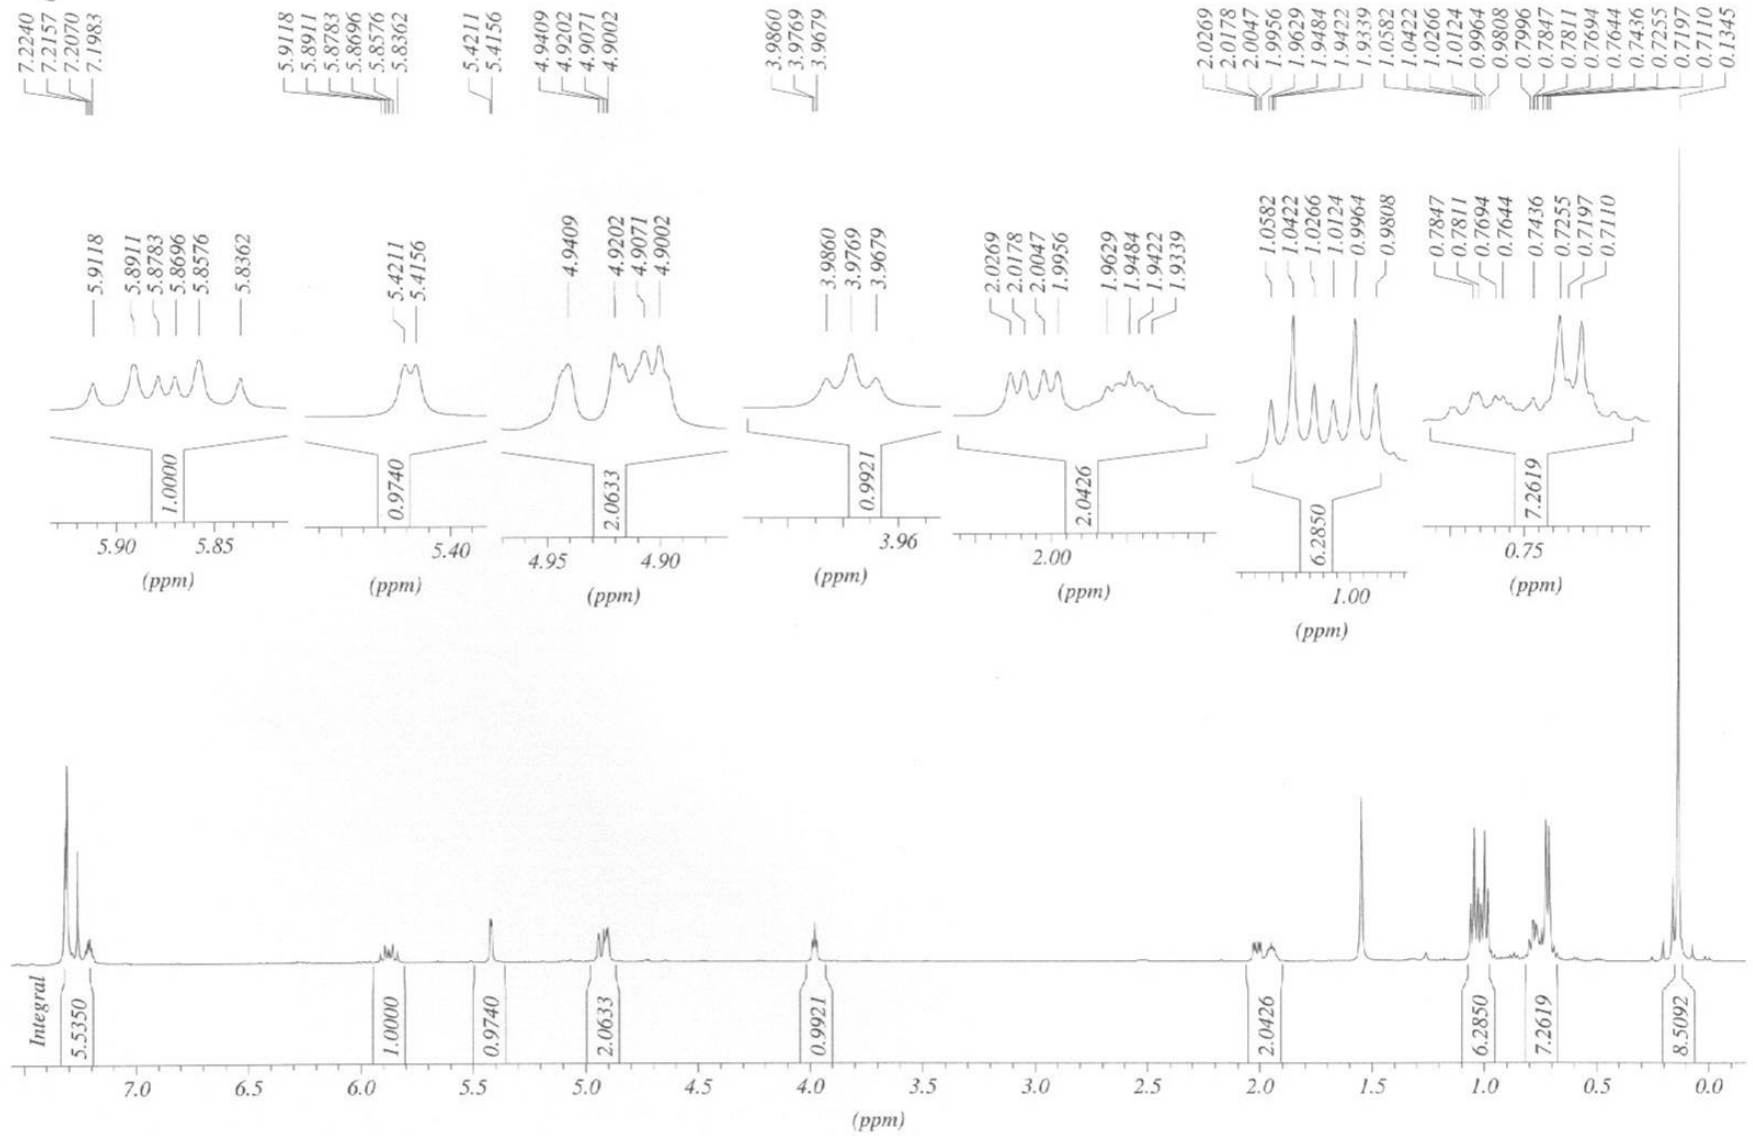

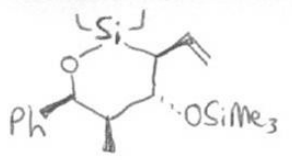

— 143.4566  
— 138.3494

— 127.7623  
— 126.3269  
— 125.7084

— 113.9080

— 77.4917  
— 72.1308

— 45.3578  
— 38.6011

— 11.4396  
— 6.5307  
— 6.5069  
— 6.4435  
— 4.8732  
— 0.2498

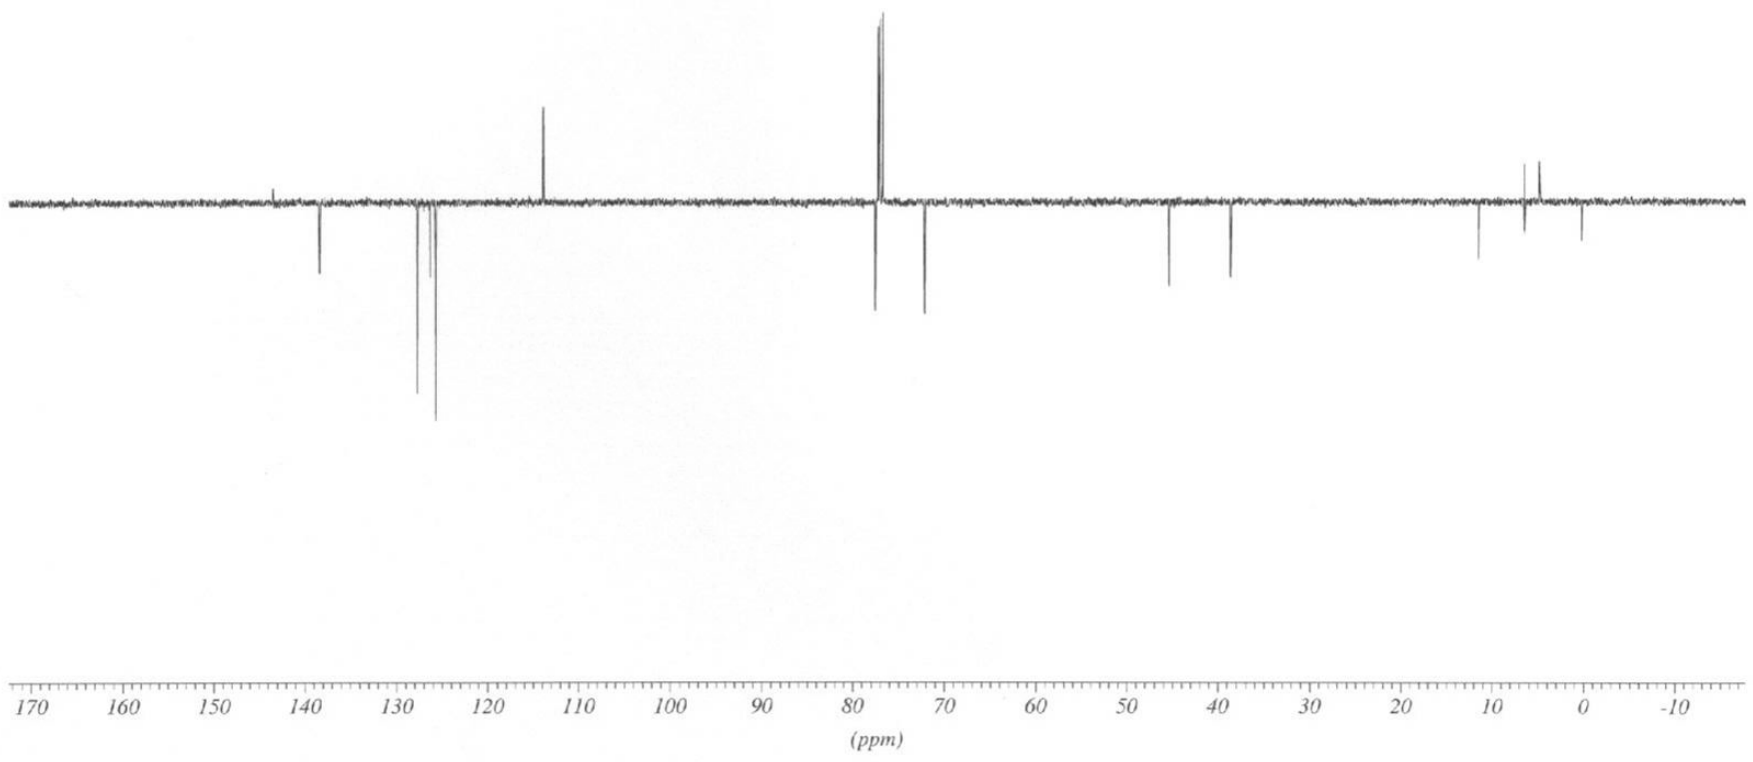

Peter Jarvis Barcode 3902 in CDC13 at +27C, set temp  
dix500, Gradient COSY90

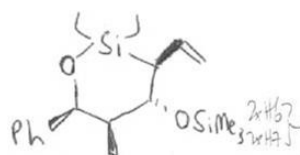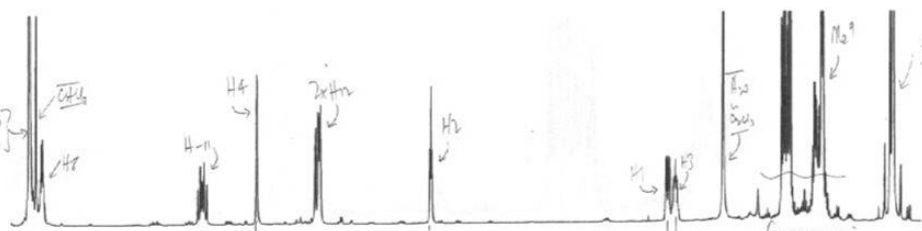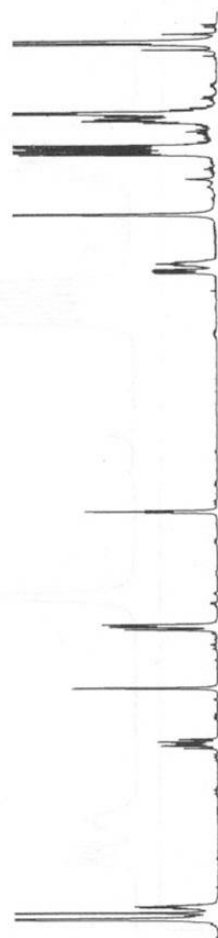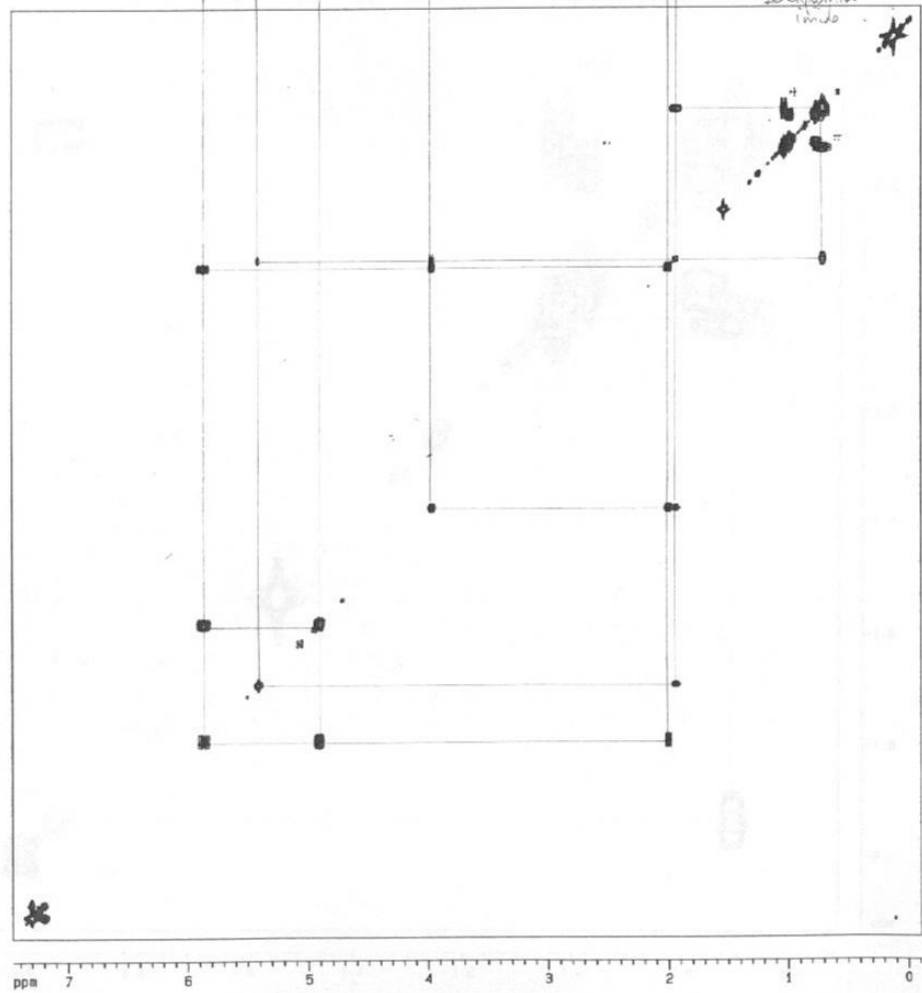

Current Data Parameters  
 NAME j128p1id  
 EXPNO 3  
 PROCNO 1

F2 - Acquisition Parameters  
 Date\_ 20050726  
 Time 19.25  
 INSTRUM dix500  
 PROBHD 5 mm TBI H/C  
 PULPROG coeypg  
 TD 2048  
 SOLVENT CDC13  
 NS 8  
 DS 16  
 SMH 4310.345 Hz  
 FIDRES 2.104661 Hz  
 AQ 0.2376190 sec  
 RG 382  
 DM 116.000 usec  
 DE 5.50 usec  
 TE 300.0 K  
 d0 0.0000300 sec  
 D1 2.0000000 sec  
 d13 0.0000300 sec  
 D16 0.0001000 sec  
 IN0 0.00023200 sec

----- CHANNEL f1 -----  
 NUC1 1H  
 P0 10.80 usec  
 P1 10.80 usec  
 PL1 1.00 dB  
 SFO1 500.1318967 MHz

----- GRADIENT CHANNEL -----  
 GRAM1 SINE.100  
 GRAM2 SINE.100  
 GPX1 0.00 %  
 GPX2 0.00 %  
 GPY1 0.00 %  
 GPY2 0.00 %  
 GPZ1 10.00 %  
 GPZ2 10.00 %  
 P16 1000.00 usec

F1 - Acquisition parameters  
 NDO 1  
 TD 512  
 SFO1 500.1319 MHz  
 FIDRES 8.418642 Hz  
 SW 8.618 ppm

F2 - Processing parameters  
 SI 2048  
 SF 500.1300233 MHz  
 MW SINE  
 SSB 0  
 LB 0.00 Hz  
 GB 0  
 PC 1.00

F1 - Processing parameters  
 SI 1024  
 MC2 0F  
 SF 500.1300233 MHz  
 MW SINE  
 SSB 0  
 LB 0.00 Hz  
 GB 0

2D NMR plot parameters  
 CX2 20.00 cm  
 CX1 20.00 cm  
 F2PLO 7.463 ppm  
 F2LO 3732.40 Hz  
 F2PHI -0.104 ppm  
 F2HI -51.78 Hz  
 F1PLO 7.480 ppm  
 F1LO 3740.82 Hz  
 F1PHI -0.120 ppm  
 F1HI -60.20 Hz  
 F2PPMCM 0.37832 ppm/cm  
 F2HZCM 189.20898 Hz/cm  
 F1PPMCM 0.38000 ppm/cm  
 F1HZCM 190.05087 Hz/cm

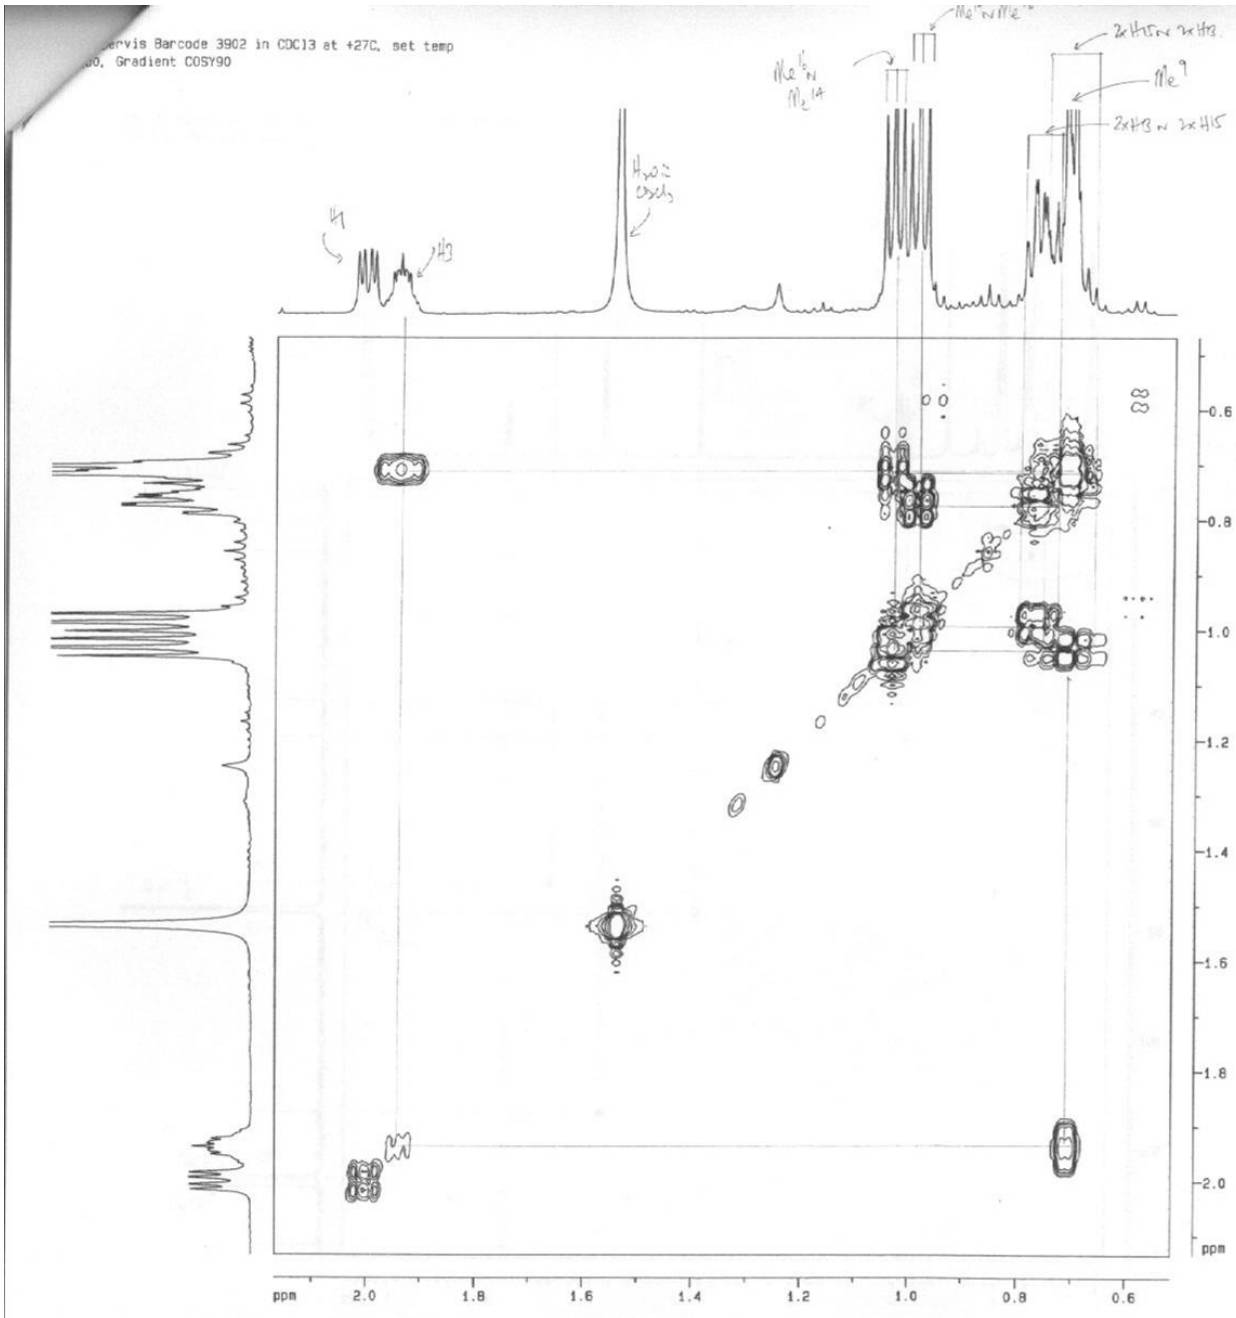



Peter Jarvis Barcode 3902 in CDCl3 at +27C, set temp  
dix500, Gradient HSGC

See Comp 90  
for coupling  
patterns

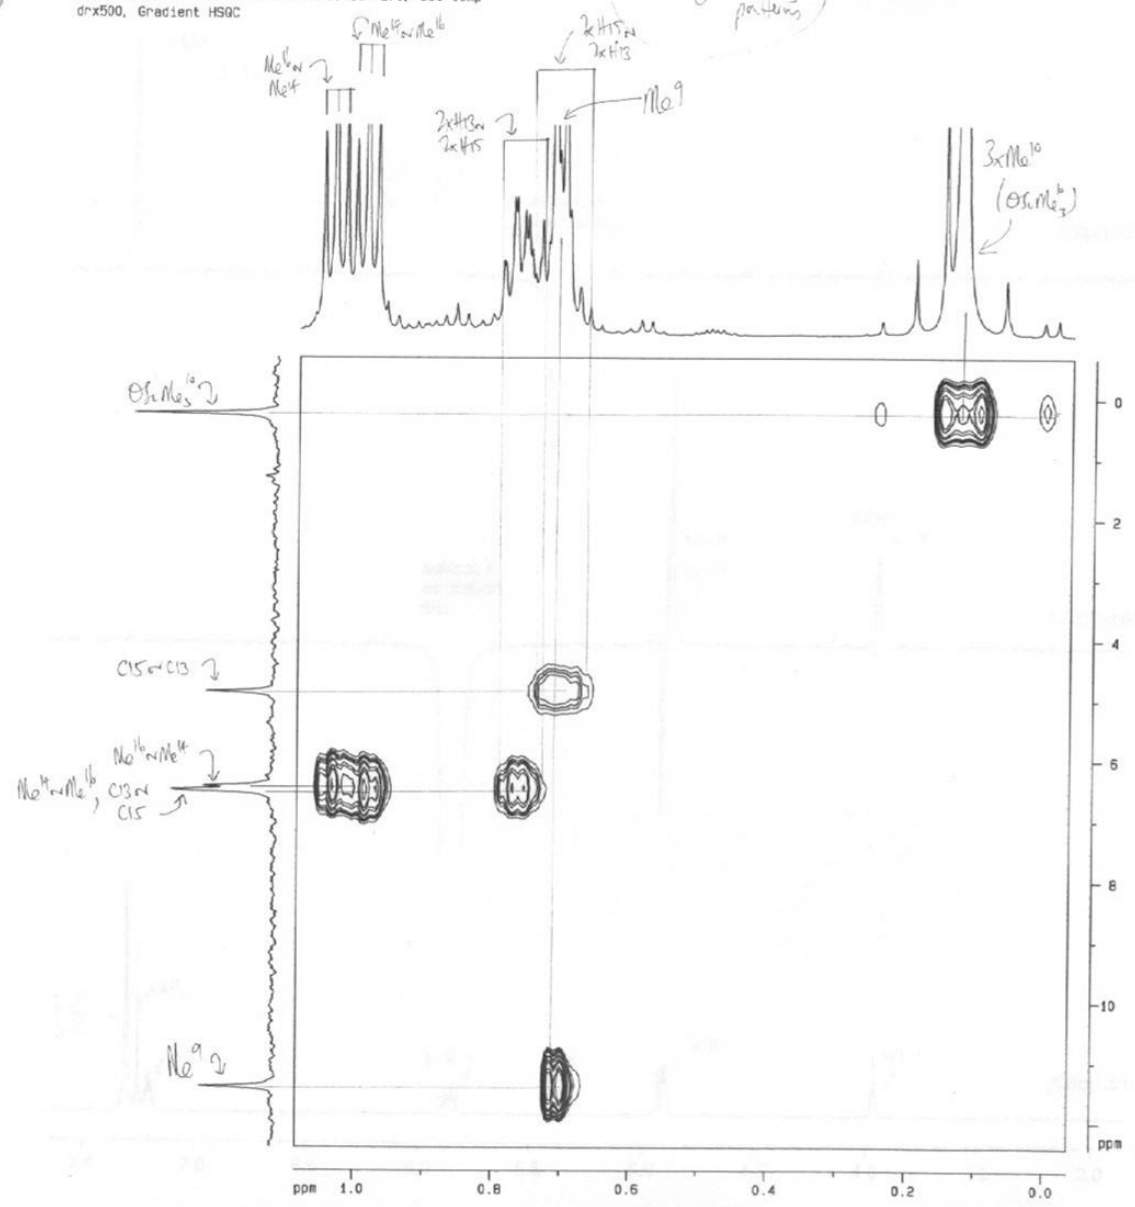

Peter Jervis Barcode 3902 in CDCl3 at +27C, set temp, drx500, 1D-GOESY

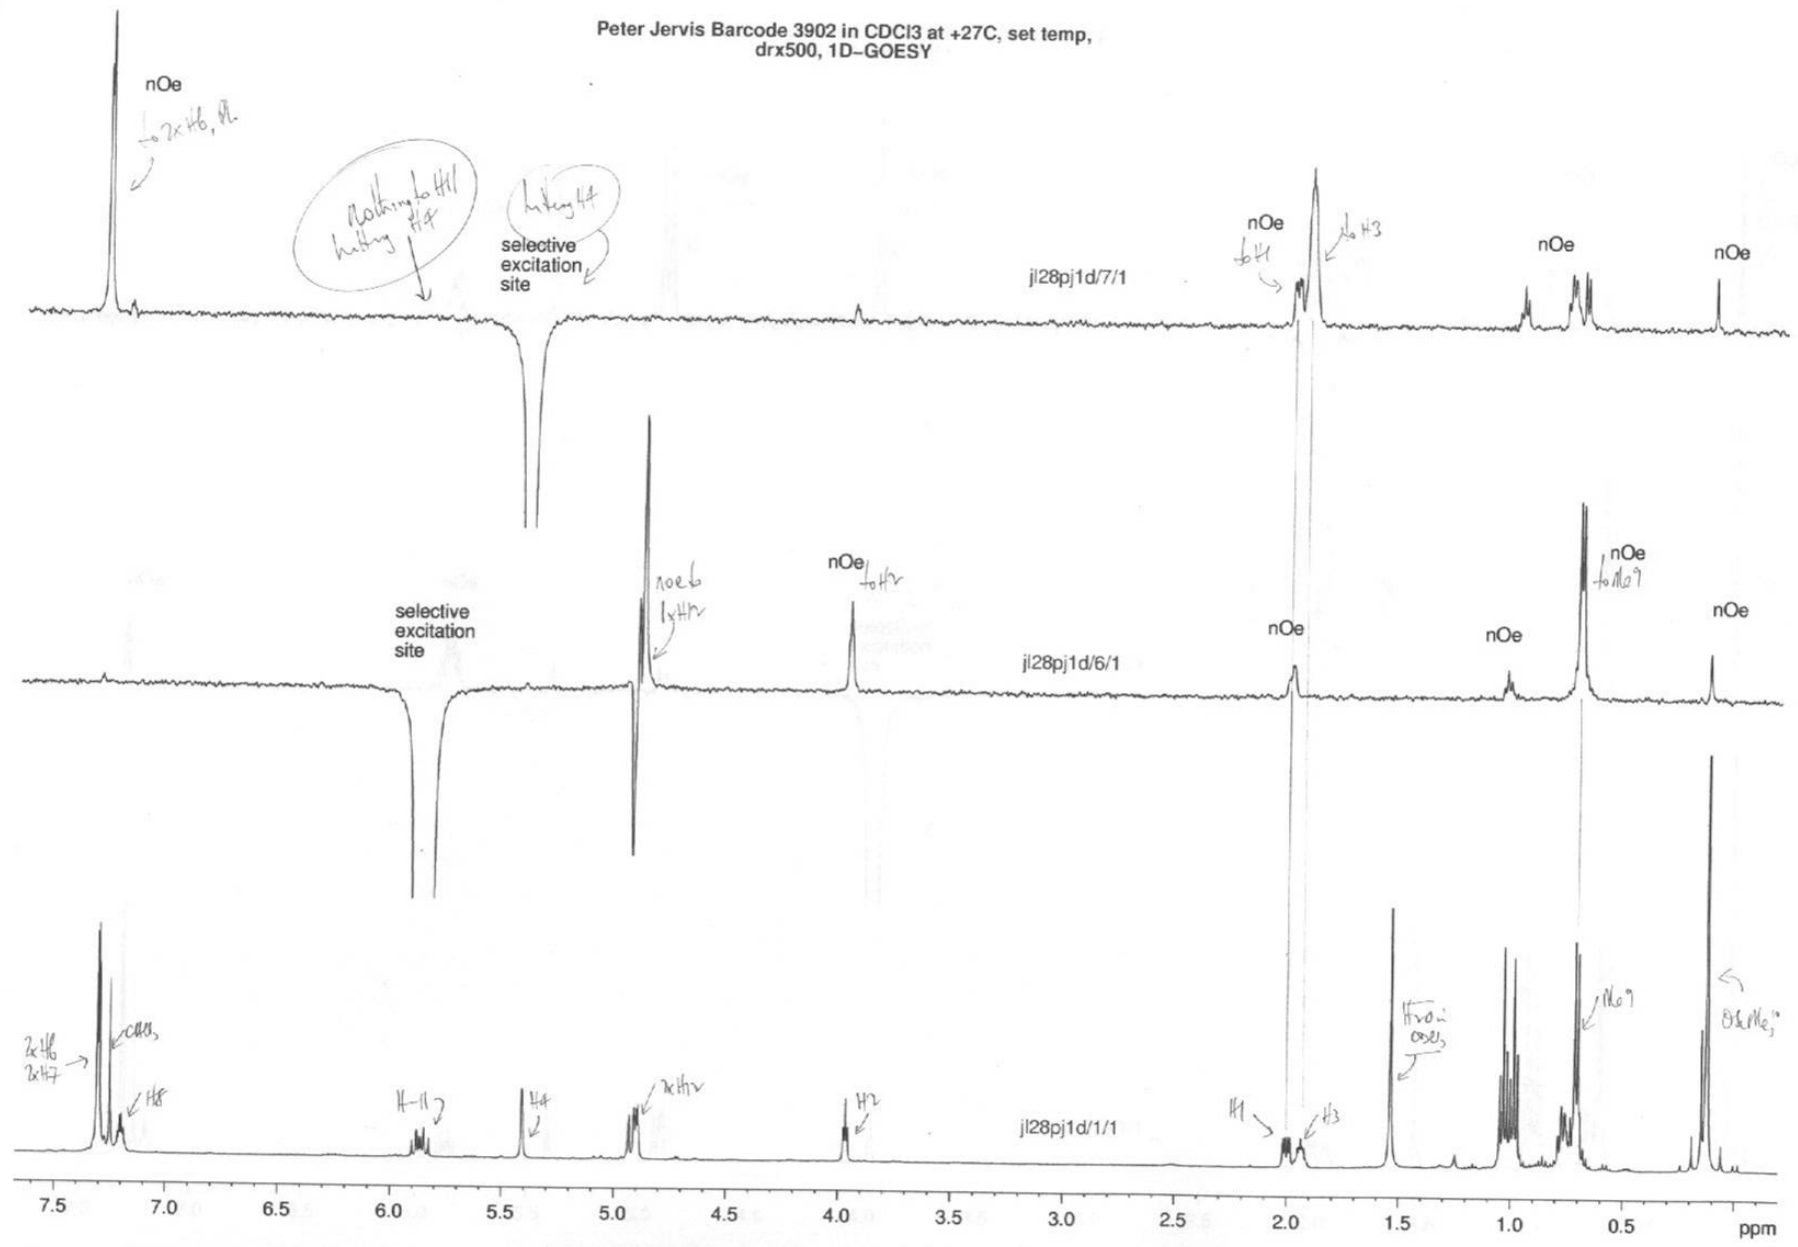



Peter Jervis Barcode 3902 in CDCl3 at +27C, set temp, drx500, 1D-GOESY

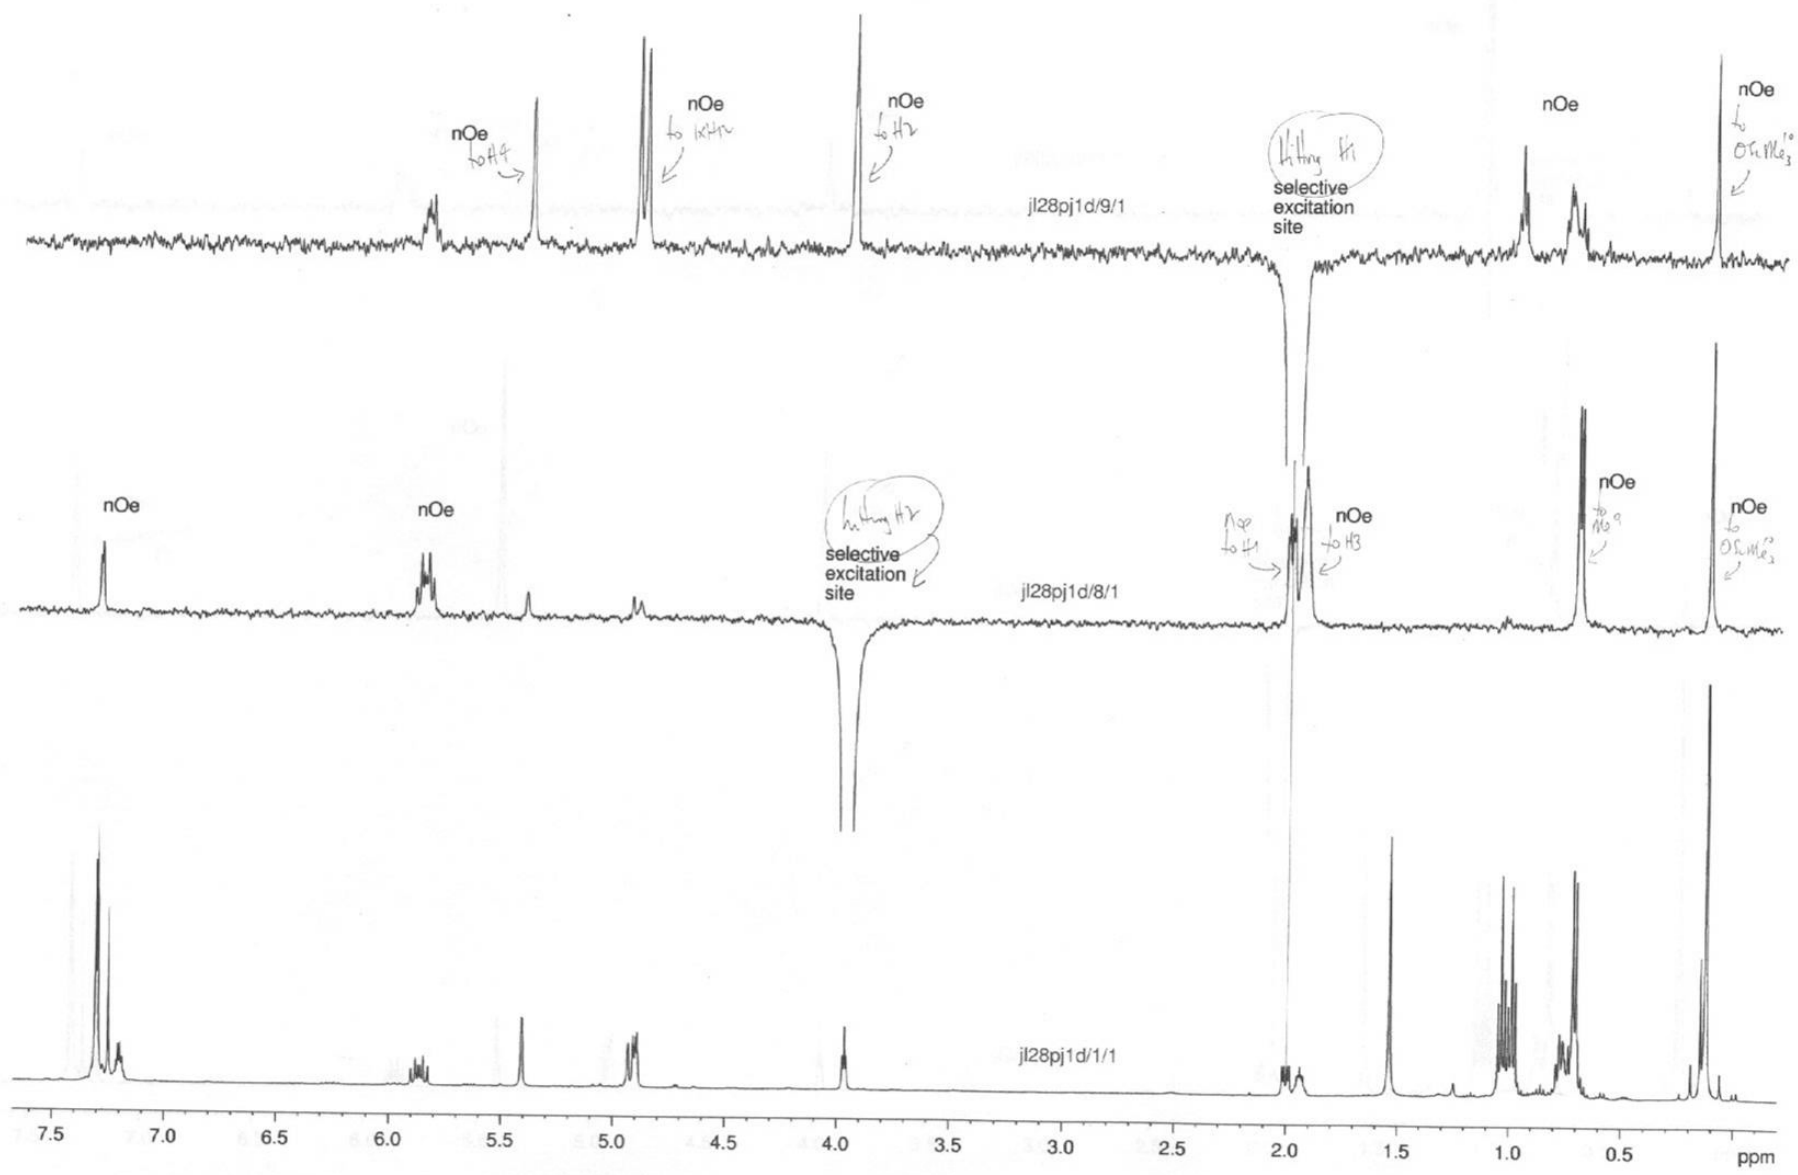

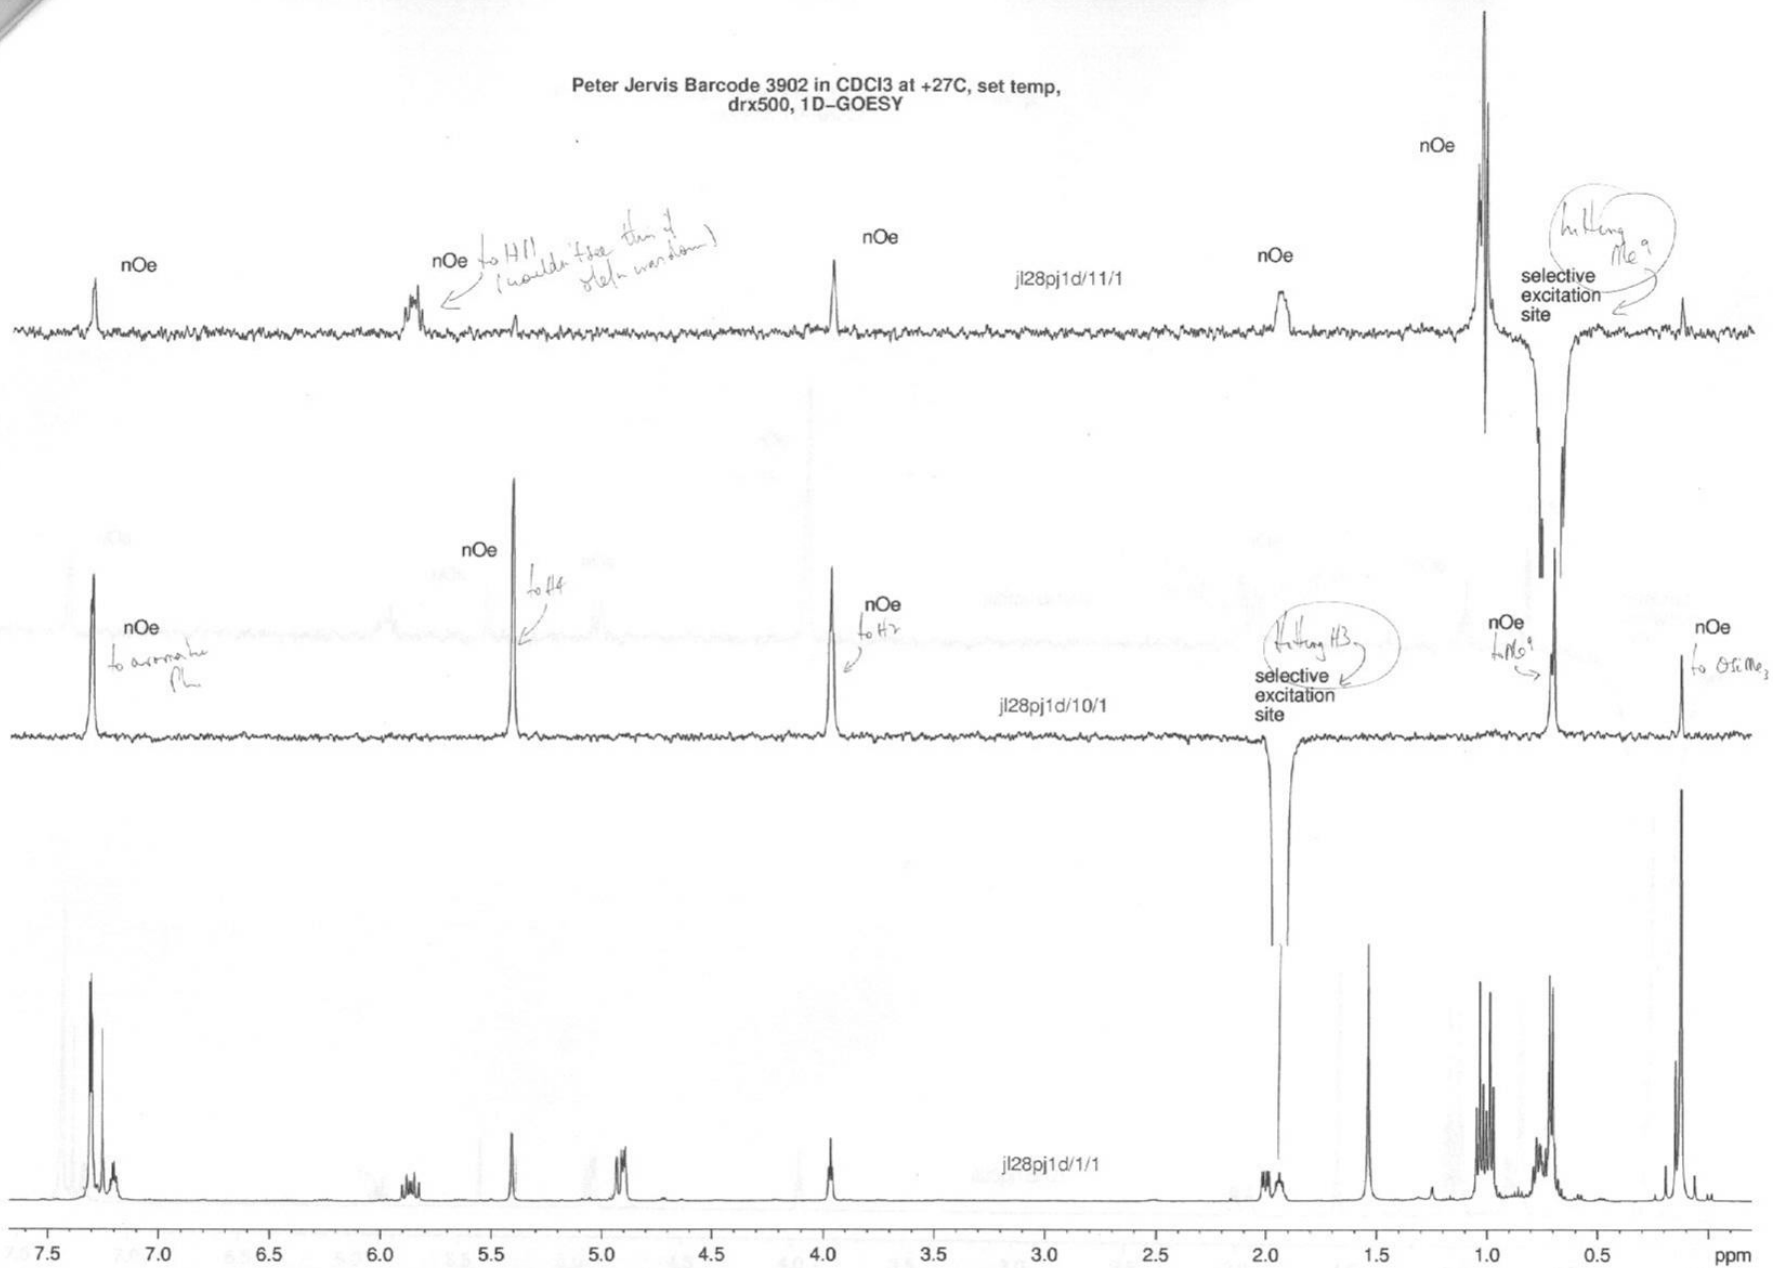

Peter Jervis Barcode 3902 in CDCl<sub>3</sub> at +27C, set temp,  
drx500, 1D-GOESY

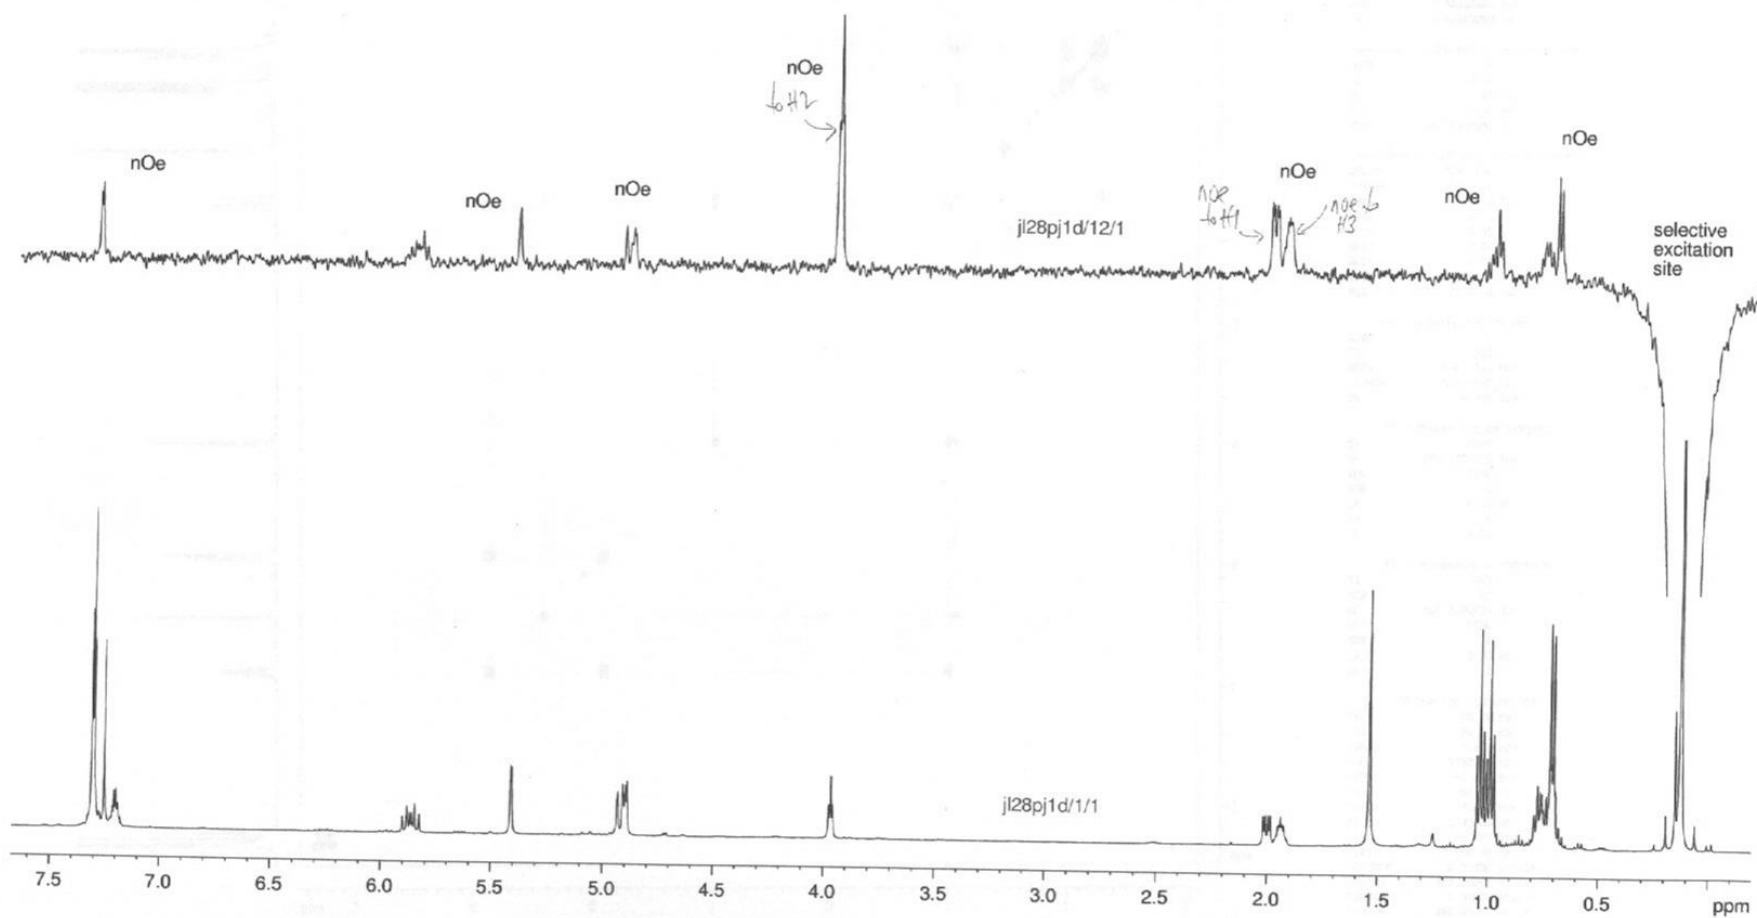

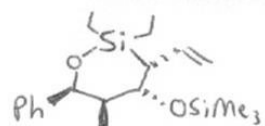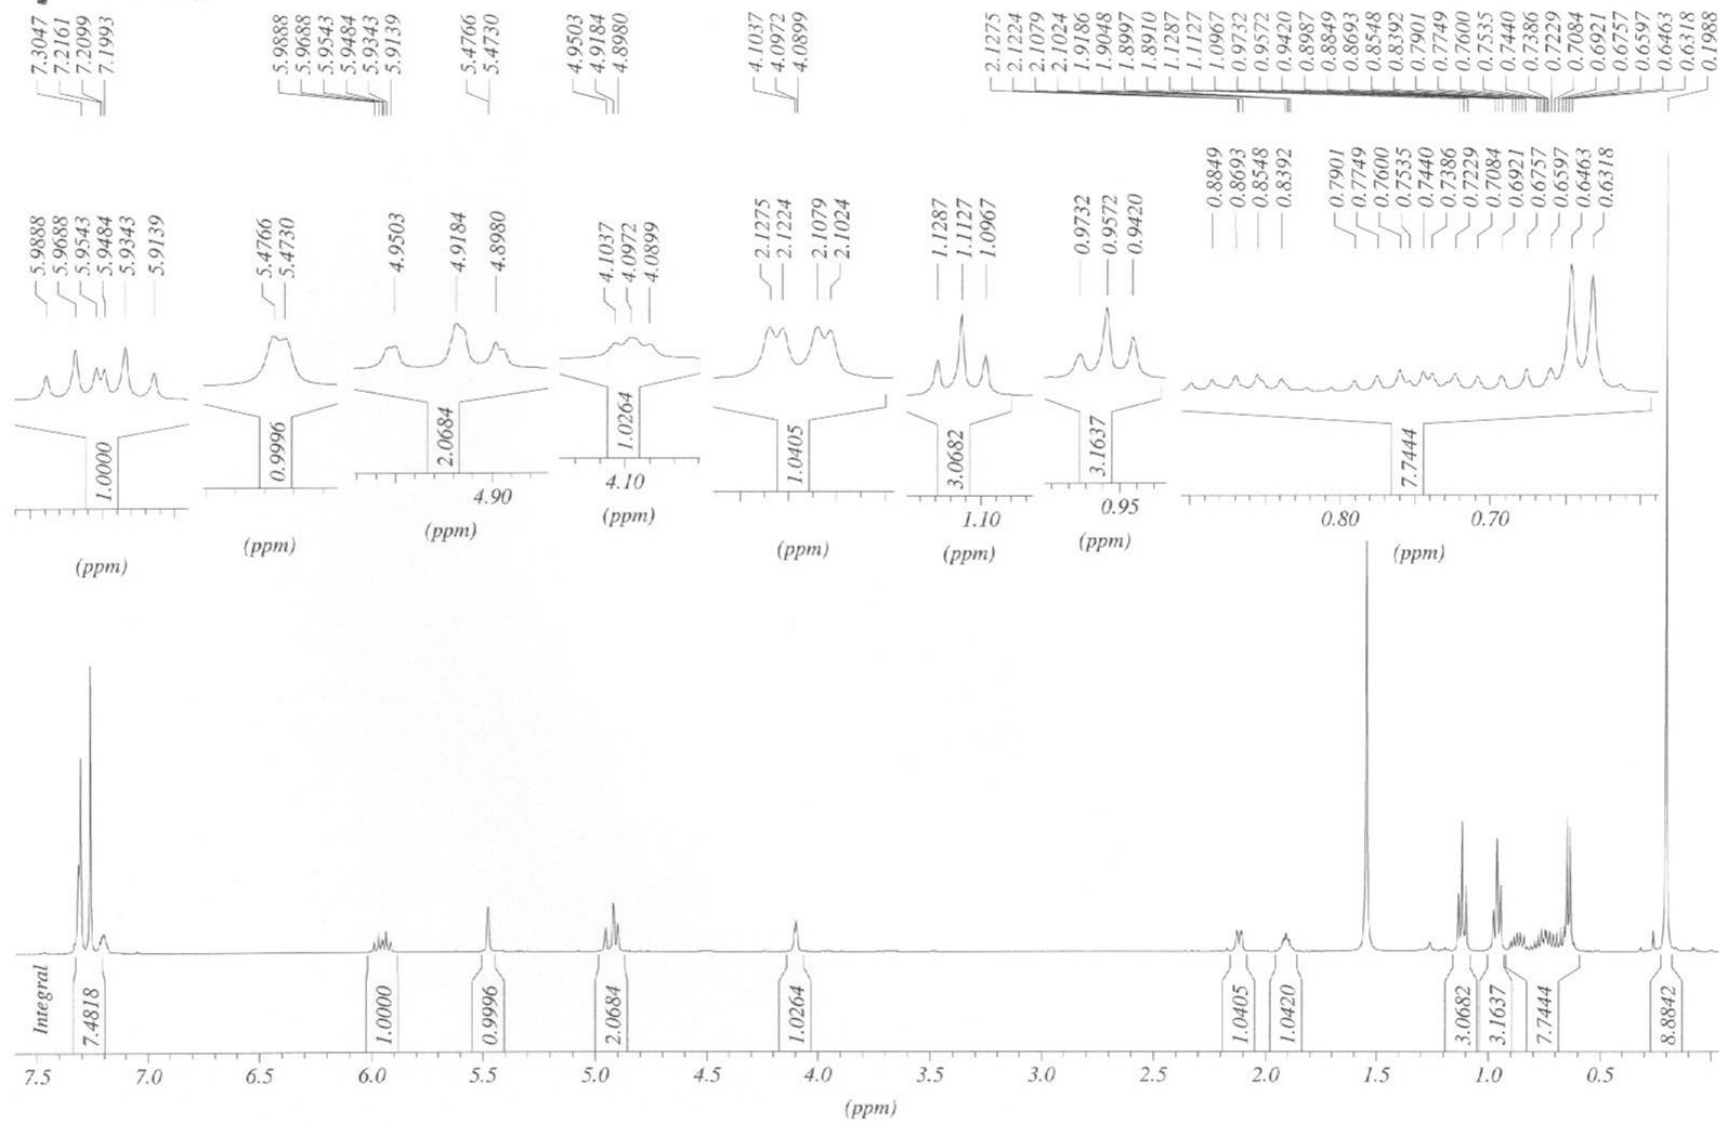

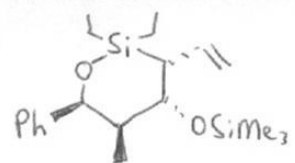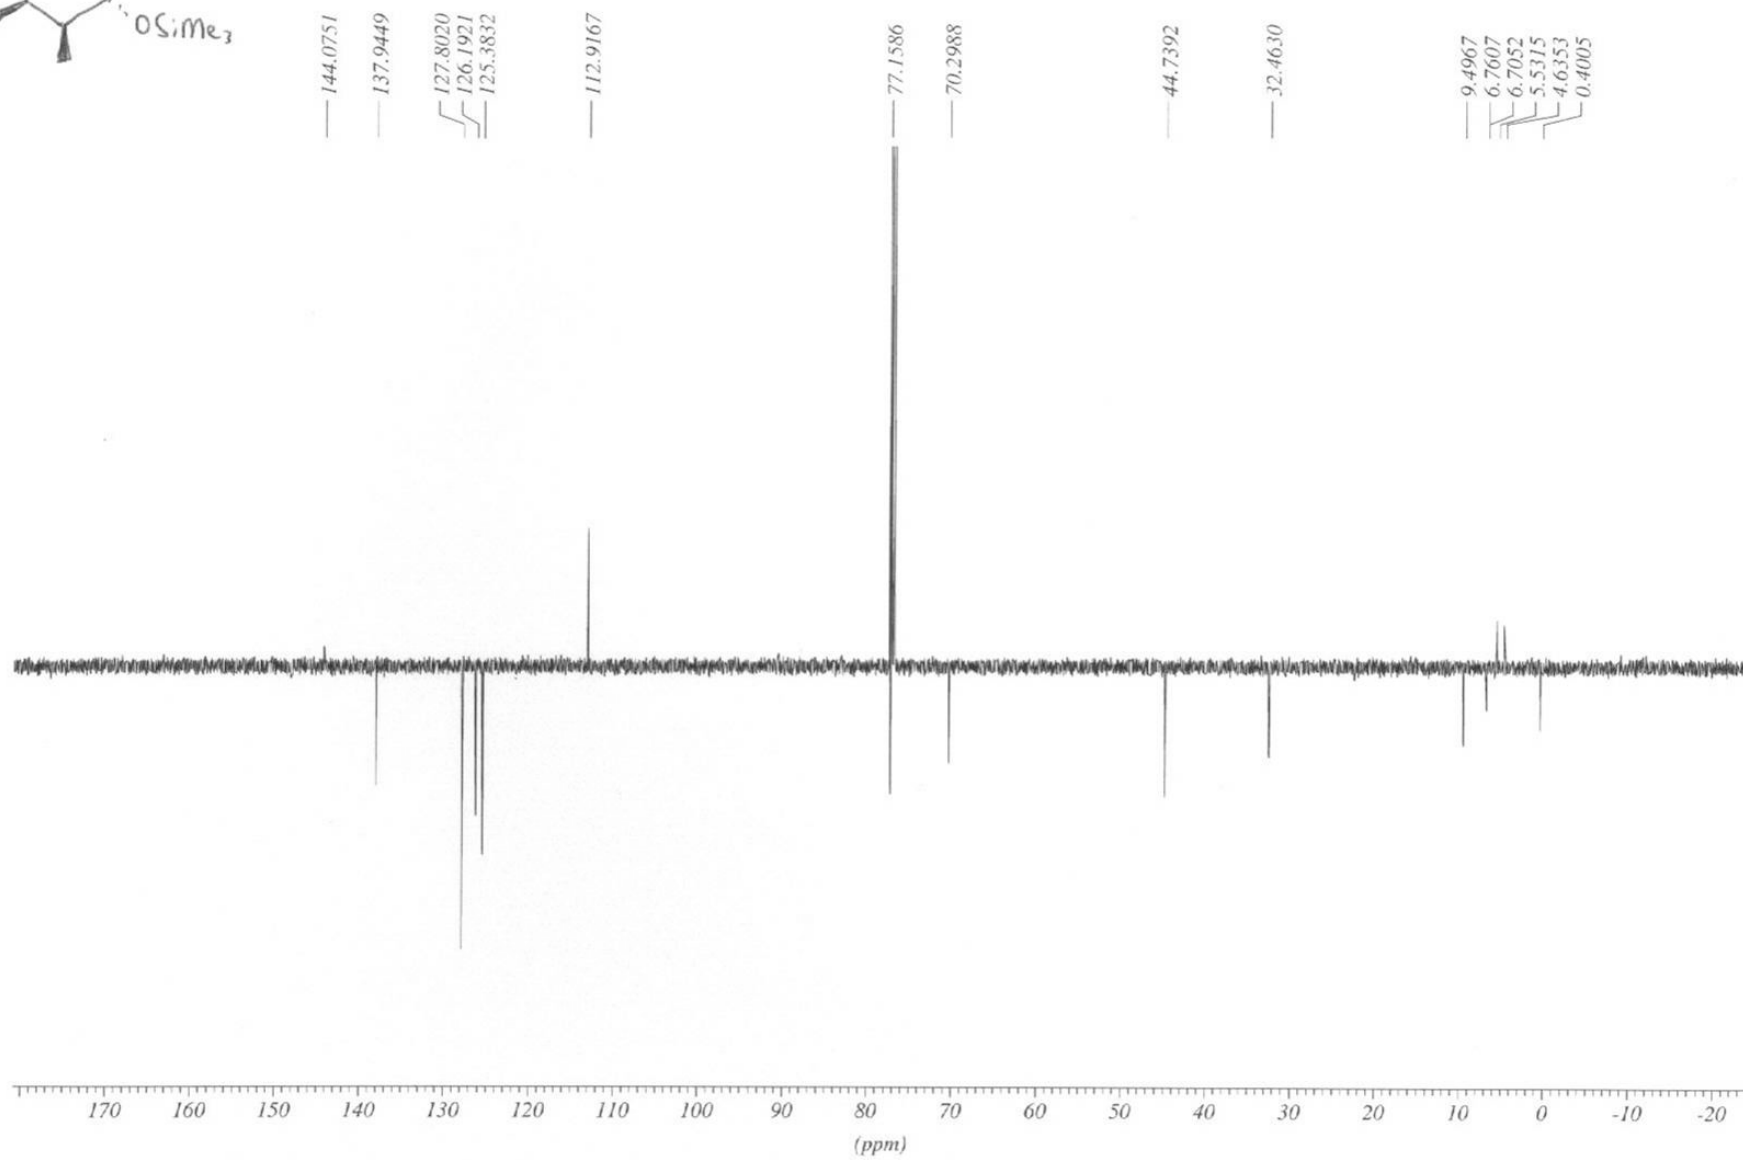

Peter Jarvis Sample 09/09/05 in CDCl3 at +27C, set temp  
drx500, Gradient COSY90

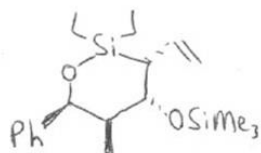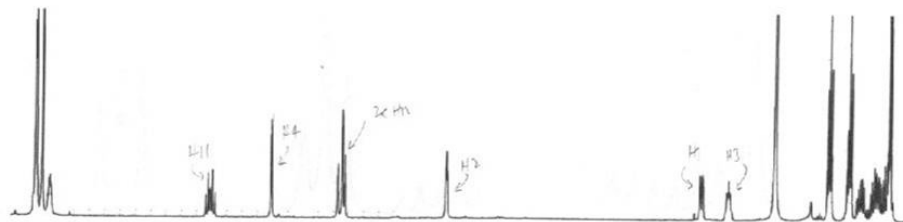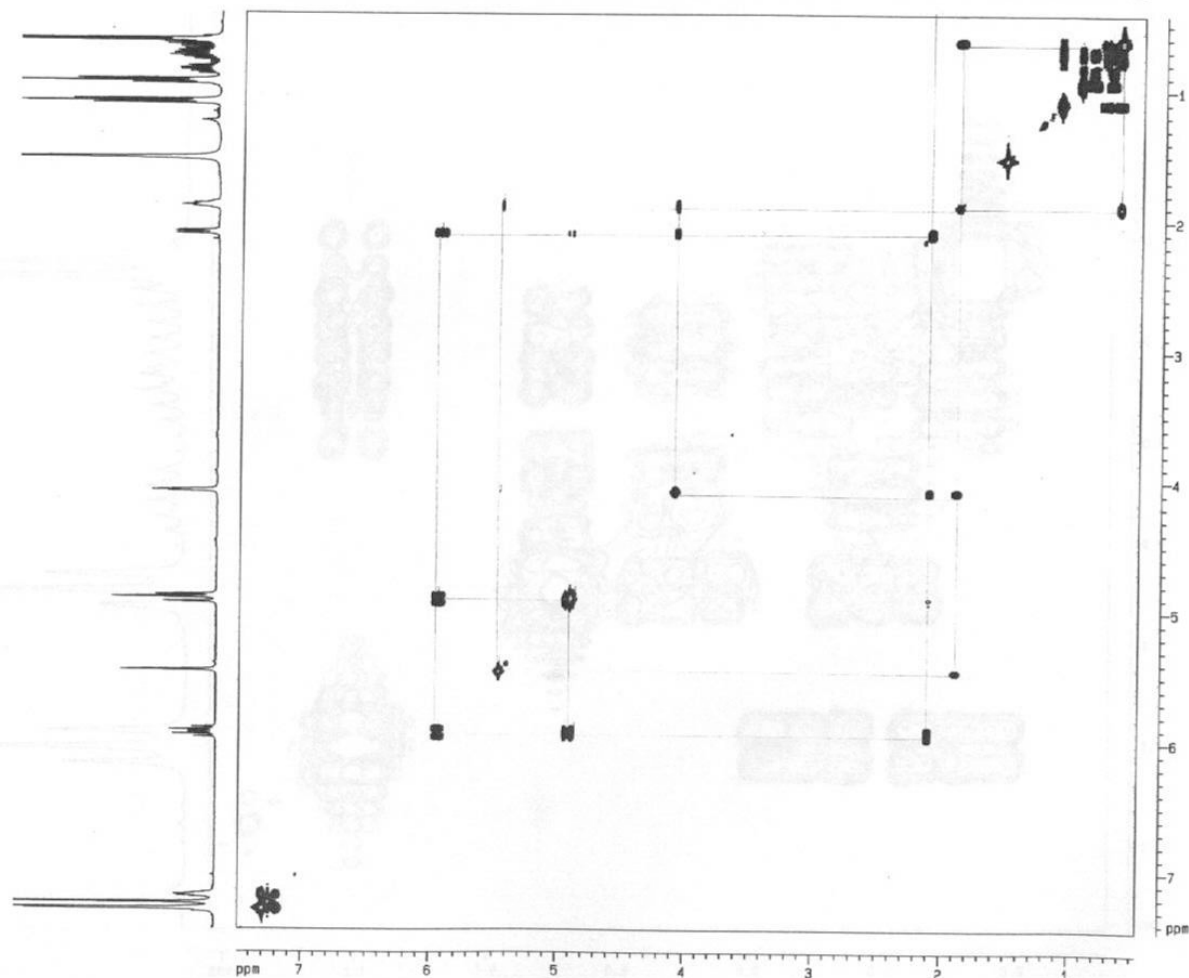

Current Data Parameters  
NAME sp09j1d  
EXPNO 10  
PROCNO 1

F2 - Acquisition Parameters  
Date\_ 20050905  
Time 20.33  
INSTRUM drx500  
PROBHD 5 mm TBI H/C  
PULPROG coasygp  
TD 2048  
SOLVENT CDCl3  
NS 8  
DS 16  
SWH 4310.345 Hz  
FIDRES 2.104651 Hz  
AQ 0.2375190 sec  
RG 1024  
DM 116.000 usec  
DE 5.50 usec  
TE 300.0 K  
d0 0.0000300 sec  
D1 2.0000000 sec  
d13 0.0000300 sec  
D15 0.0001000 sec  
INO 0.0002300 sec

----- CHANNEL f1 -----  
NUC1 1H  
P0 10.70 usec  
P1 10.70 usec  
PL1 1.00 dB  
SFO1 500.1318667 MHz

----- GRADIENT CHANNEL -----  
SPRAN1 SINE.100  
SPRAN2 SINE.100  
SPX1 0.00 %  
SPX2 0.00 %  
SPY1 0.00 %  
SPY2 0.00 %  
GPZ1 10.00 %  
GPZ2 10.00 %  
P16 1000.00 usec

F1 - Acquisition parameters  
ND0 1  
TD 512  
SFO: 500.1319 MHz  
FIDRES 8.418642 Hz  
SM 8.618 ppm

F2 - Processing parameters  
SI 2048  
SF 500.1300233 MHz  
WDW SINE  
SSB 0  
LB 0.00 Hz  
GB 0  
PC 1.00

F1 - Processing parameters  
SI 1024  
MC2 GF  
SF 500.1300233 MHz  
WDW SINE  
SSB 0  
LB 0.00 Hz  
GB 0

2D NMR plot parameters  
CX2 20.00 cm  
CX1 20.00 cm  
F2PL0 7.486 ppm  
F2L0 3745.03 Hz  
F2PHI 0.456 ppm  
F2HI 226.14 Hz  
F1PL0 7.454 ppm  
F1L0 3726.19 Hz  
F1PHI 0.418 ppm  
F1HI 209.20 Hz  
F2PCMC 0.35150 ppm/cm  
F2H2C 175.84441 Hz/cm  
F1PCMC 0.35151 ppm/cm  
F1H2C 175.94962 Hz/cm

Peter Jervis Sample 09/09/05 in CDCl<sub>3</sub> at +27C, set temp  
drx500, Gradient COSY90

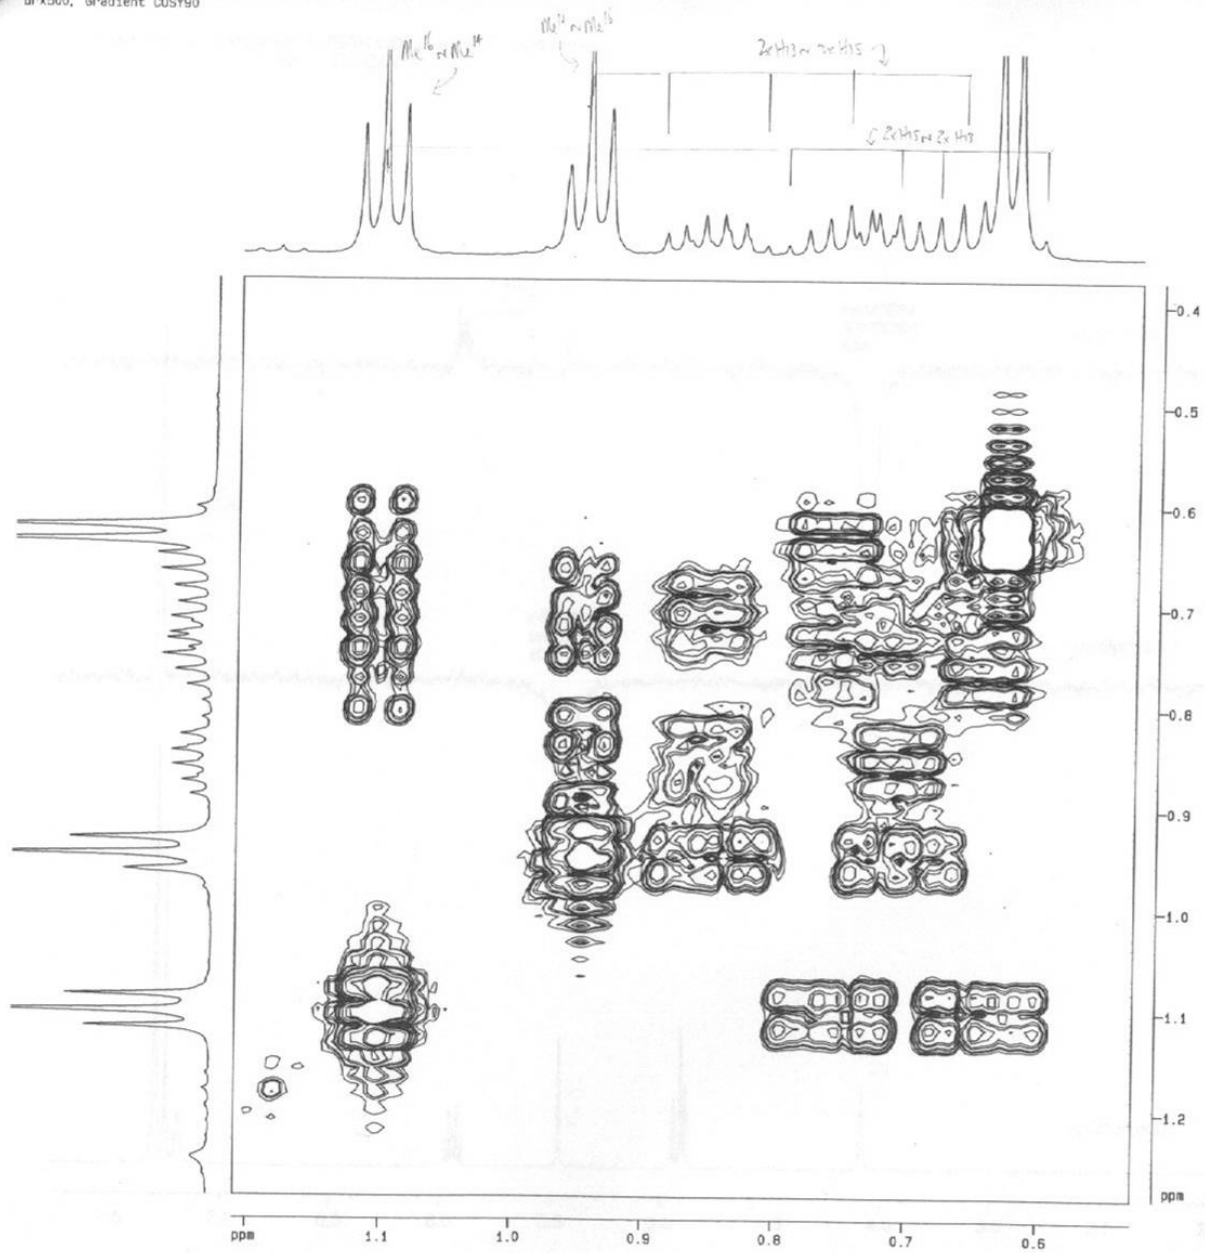





Peter Jarvis Sample 09/09/05 in CDCl<sub>3</sub> at +27C, set temp,  
drx500, 1D-GOESY

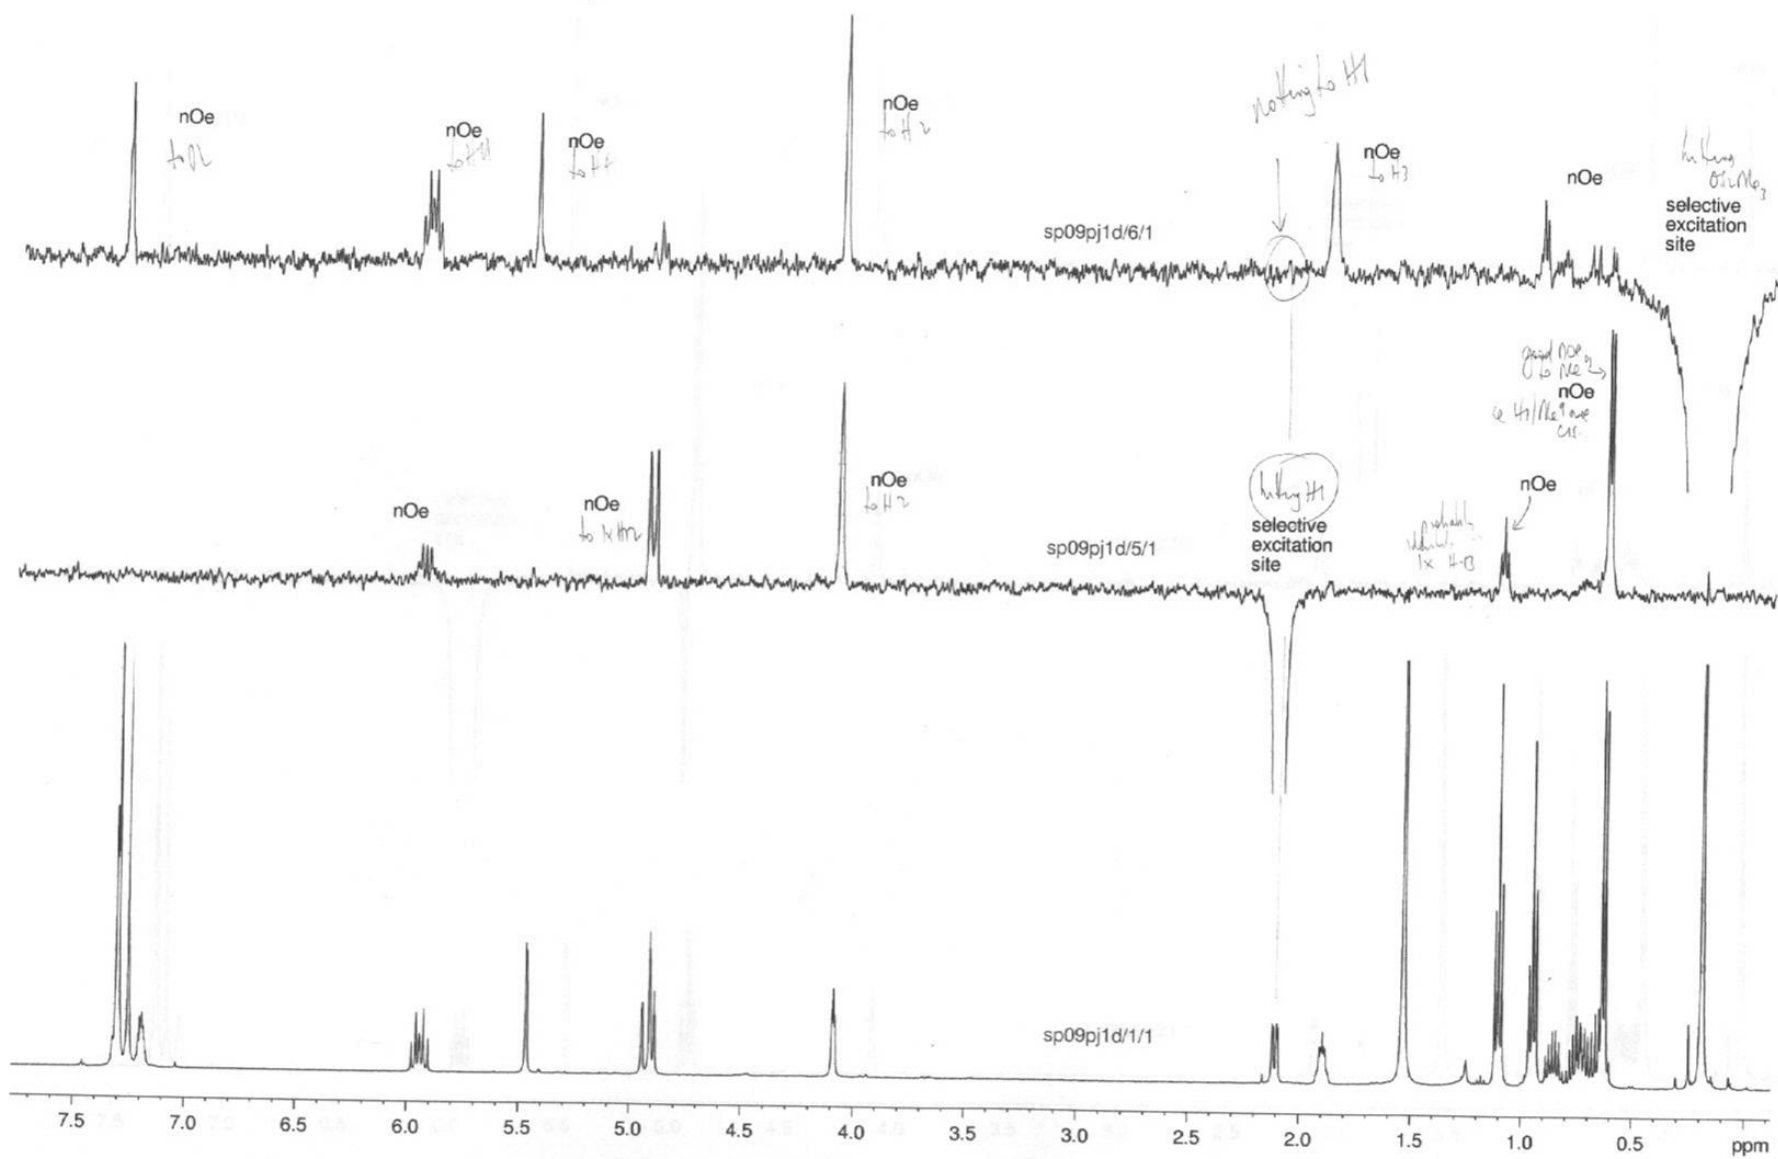

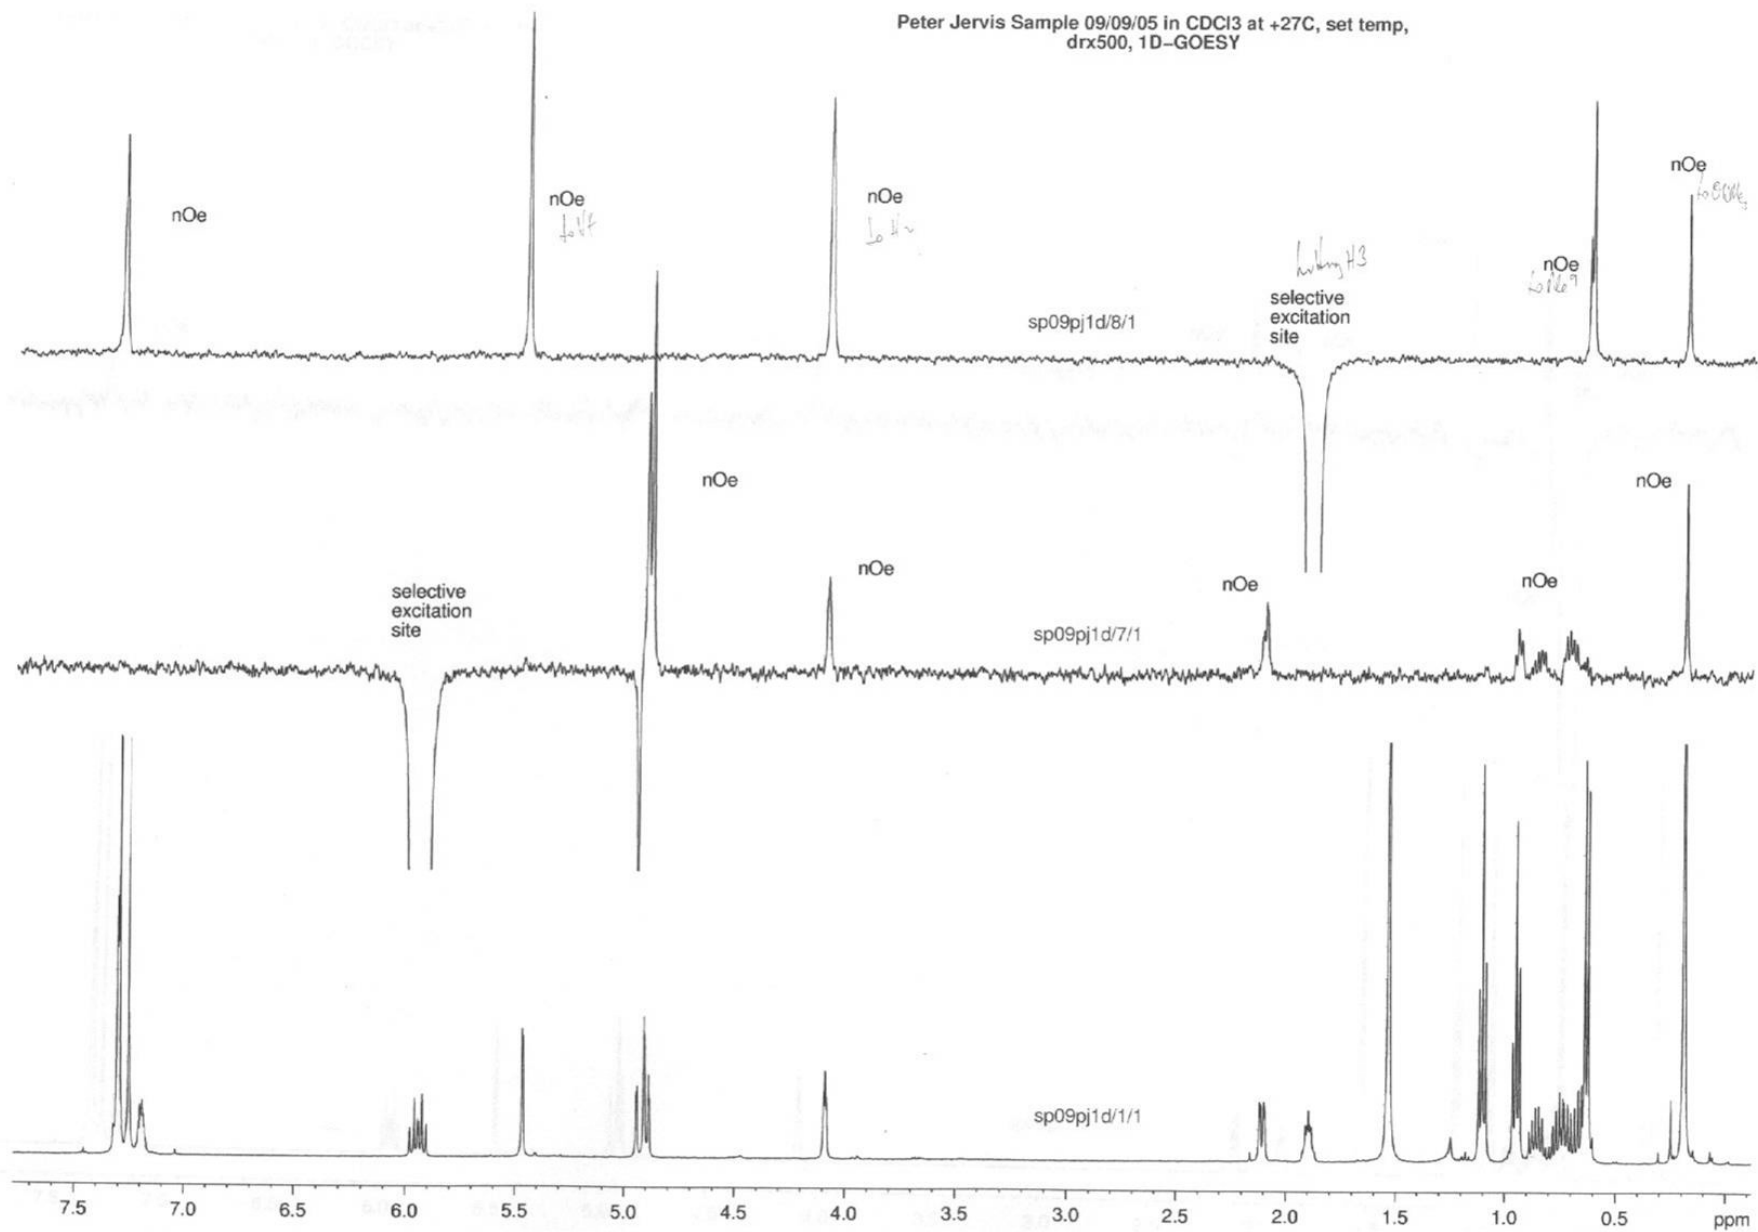

Peter Jervis Sample 09/09/05 in CDCl3 at +27C, set temp,  
drx500, 1D-GOESY

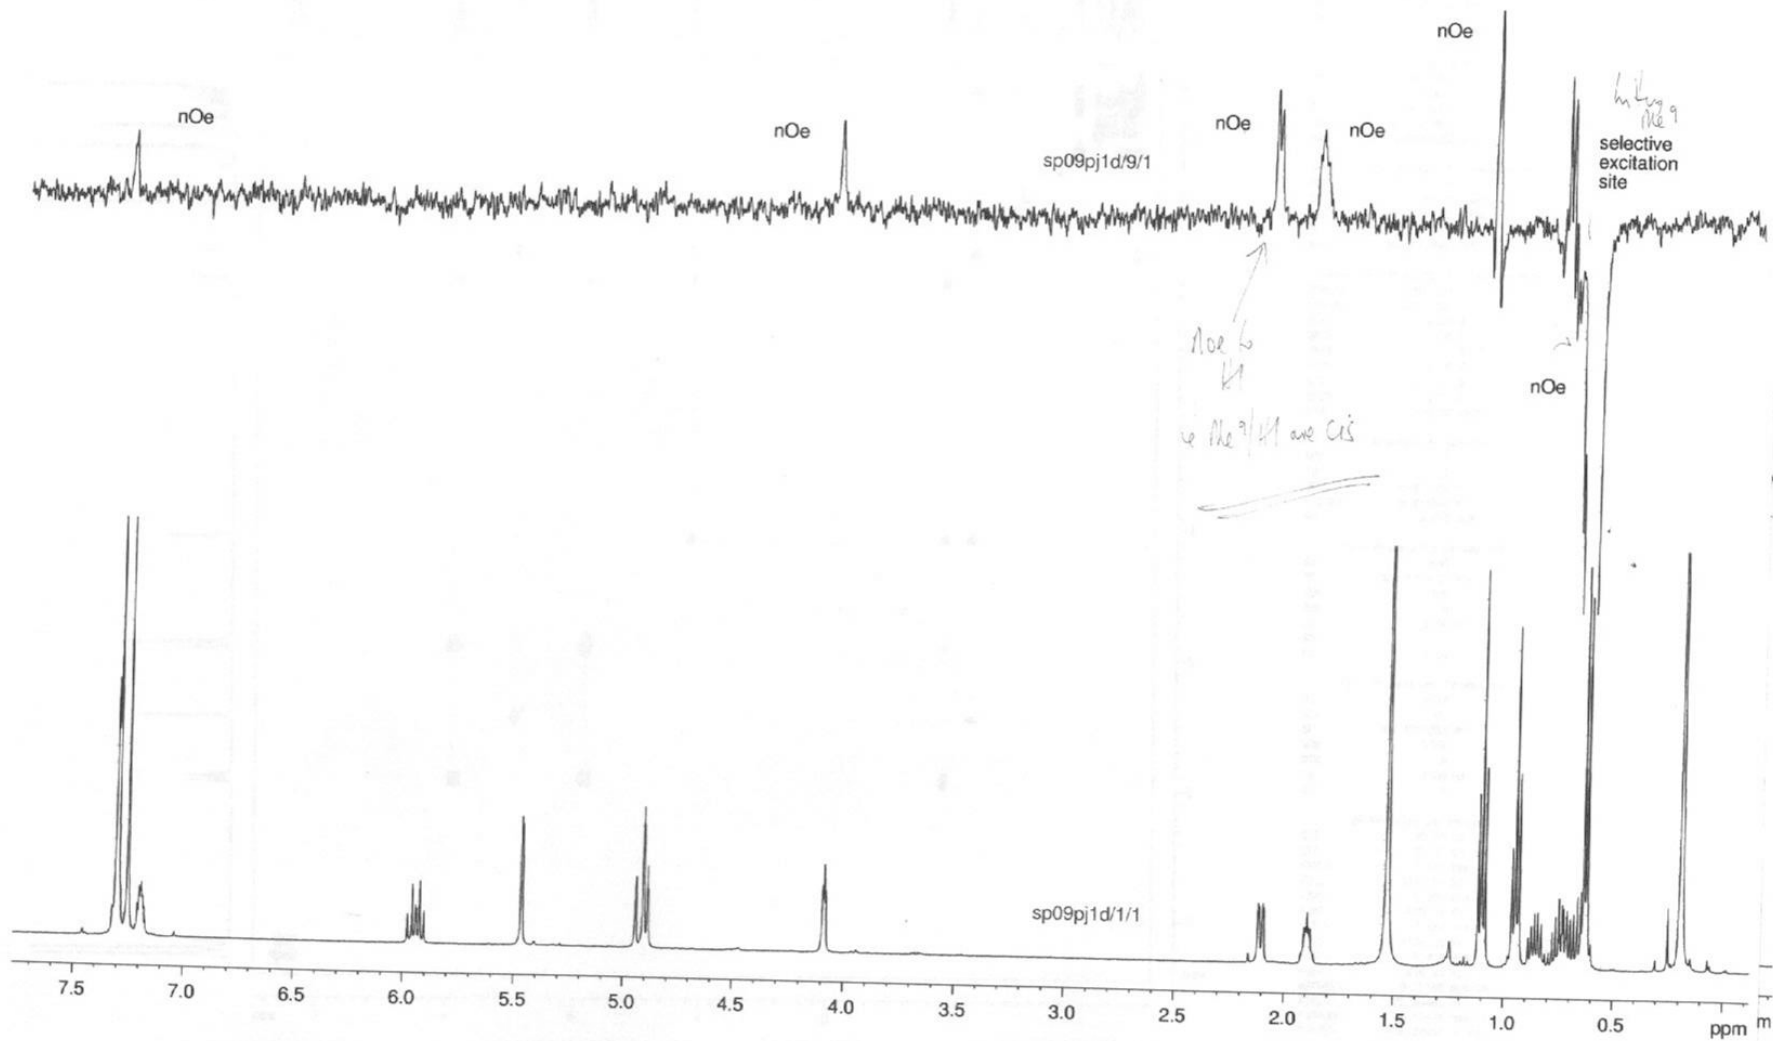

Supplement: Beilstein_J_Org_Chem-03-06-s006.pdf [file Beilstein_J_Org_Chem-03-06-s006.pdf]
