# Supplementary material for: Tether-directed synthesis of highly substituted oxasilacycles via an intramolecular allylation employing allylsilanes
Source: PubMed Central journal article supplement (PMC1810303; doi:10.1186/1860-5397-3-6), 2007-02-08

## Additional File 7

**Tether-directed synthesis of highly substituted oxasilacycles *via* an intramolecular allylation employing allylsilanes**

Peter J. Jervis and Liam R. Cox\*

email: l.r.cox@bham.ac.uk

**$^1\text{H-NMR}$  and  $^{13}\text{C-NMR}$  Spectra for the following compounds:**

**18b, 19b**

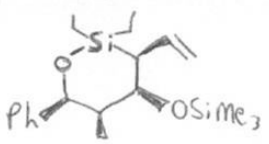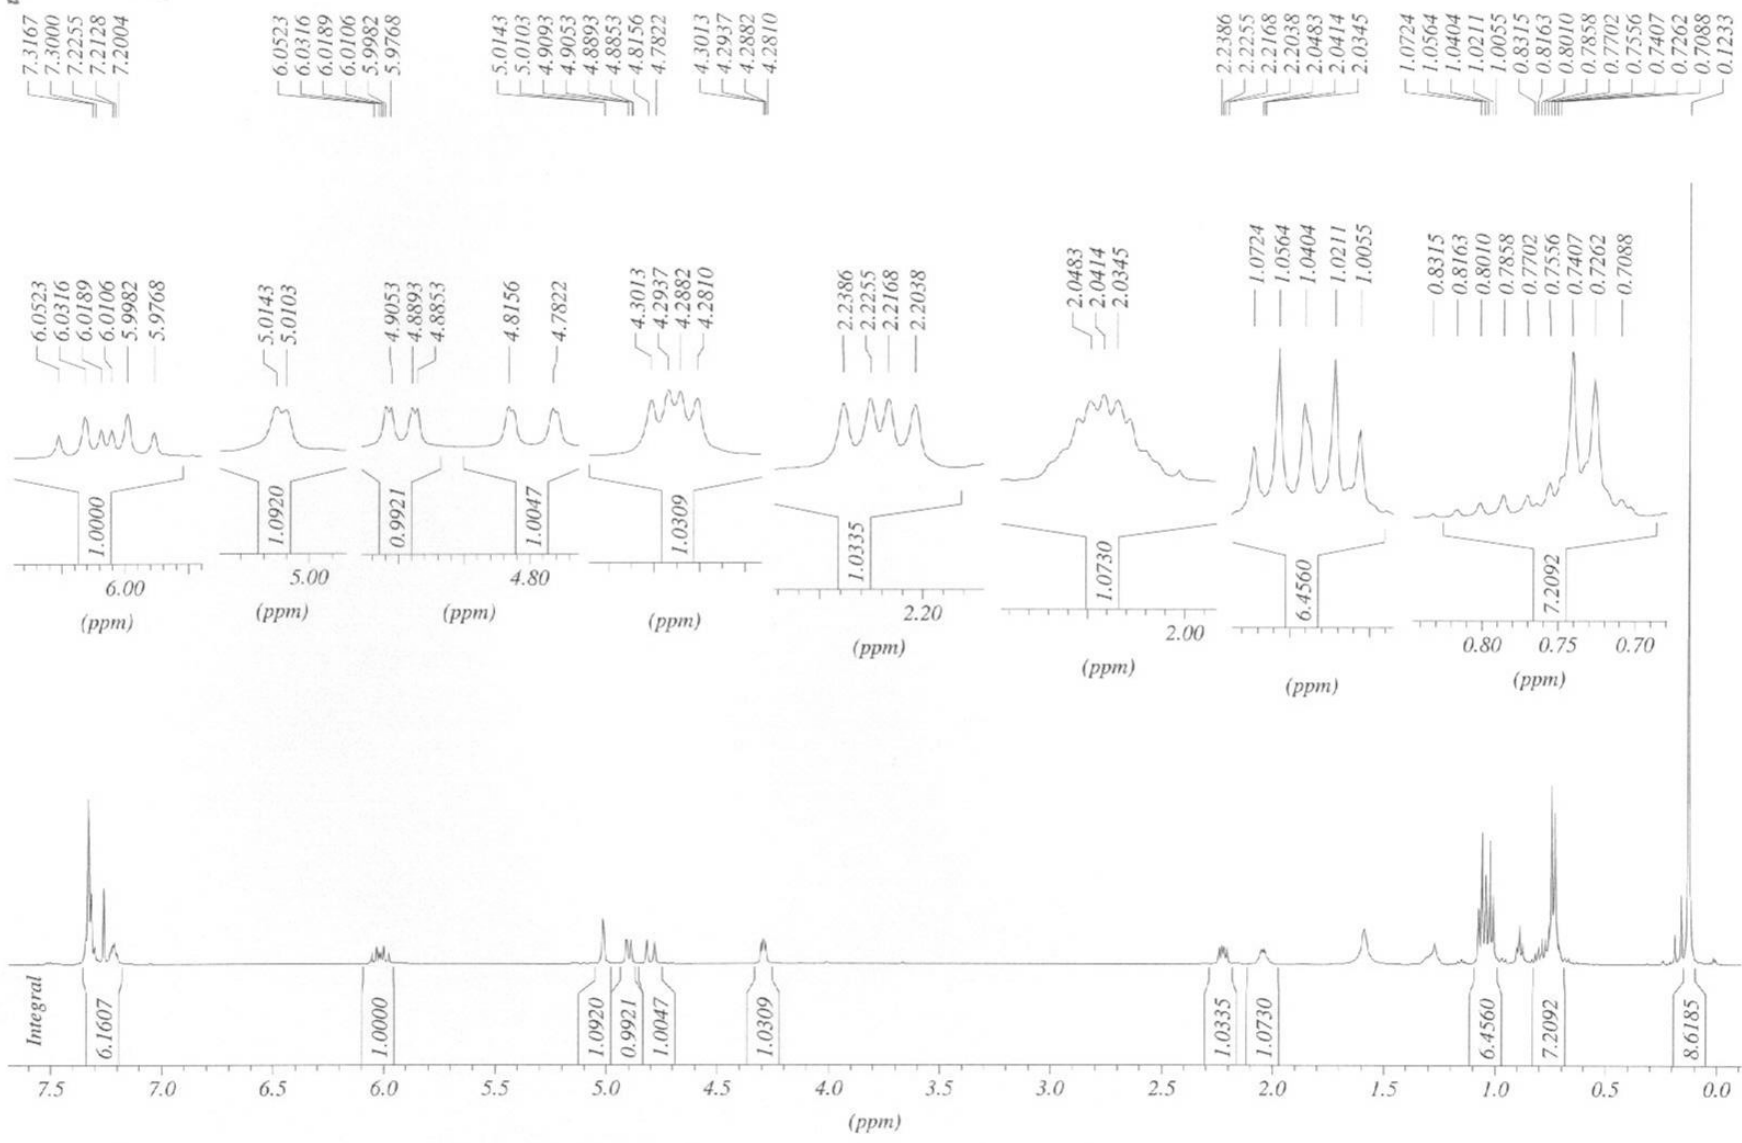

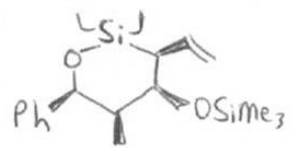

— 143.0362

— 137.2709

— 127.8099

— 126.4697

— 125.5022

— 113.9714

— 76.2387

— 74.1134

— 46.0160

— 38.2919

7.6013

6.9351

6.3007

5.7139

4.6512

0.1864

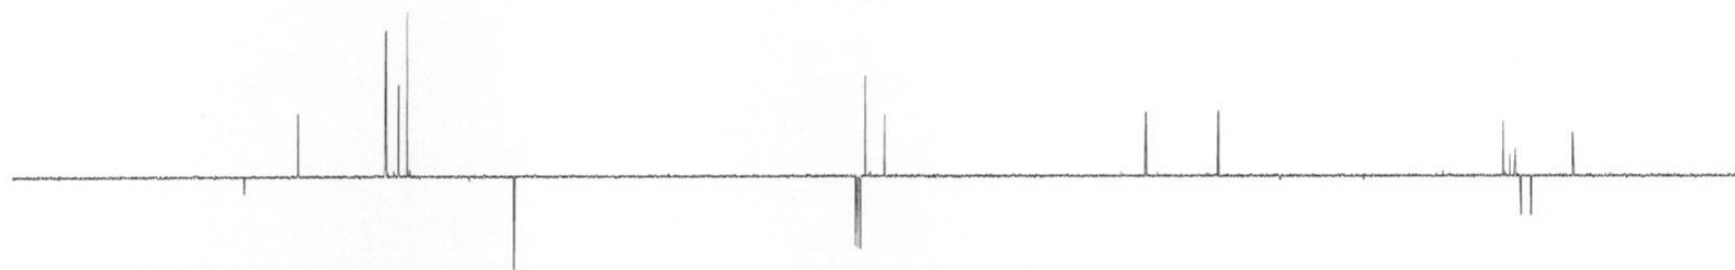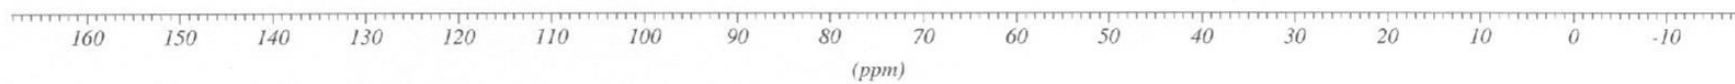

Peter Jervis Sample 04/10/05 in CDCl3 at +27C, set temp  
drex500, Gradient COSY90

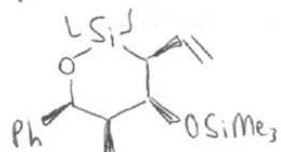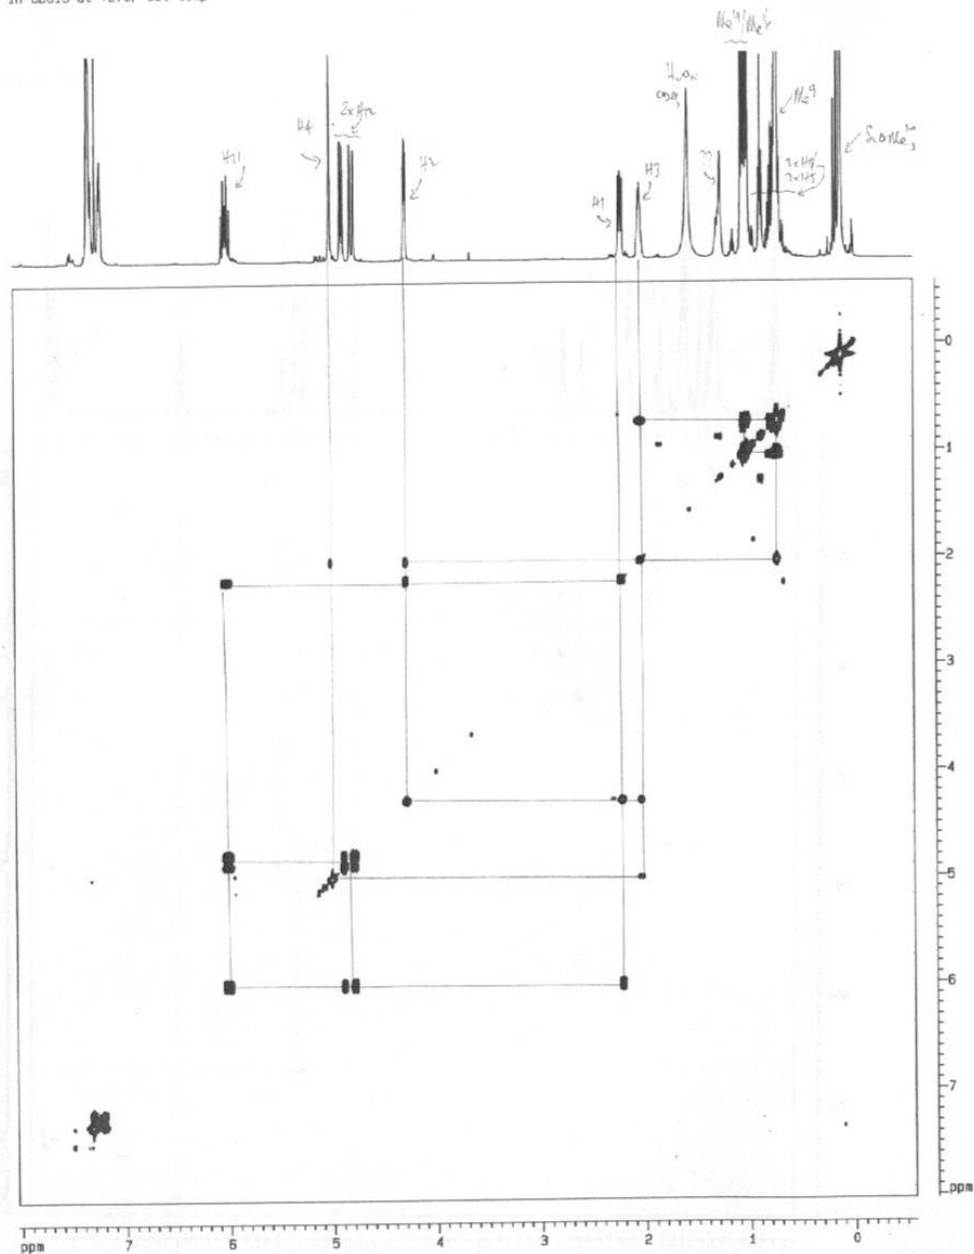

Current User Parameters  
 NAME oc040j10  
 EXPNO 10  
 PROCNO 1

F2 - Acquisition Parameters  
 Date\_ 20051005  
 Time 12.17  
 INSTRUM drex500  
 PROBHD 5 mm TBI H/C  
 PULPROG cosygp  
 TD 2048  
 SOLVENT CDCl3  
 NS 8  
 DS 16  
 SWH 4310.345 Hz  
 FIDRES 2.104661 Hz  
 AQ 0.2378180 sec  
 RG 128  
 DM 118.000 usec  
 DE 5.50 usec  
 TE 300.0 K  
 D0 0.0000300 sec  
 D1 2.0000000 sec  
 d13 0.0000300 sec  
 D16 0.0001000 sec  
 INO 0.0023200 sec

----- CHANNEL f1 -----  
 NUC1 1H  
 P0 10.70 usec  
 P1 10.70 usec  
 PL1 1.00 dB  
 SFO1 500.1318867 MHz

----- GRADIENT CHANNEL -----  
 GPMAN1 SINE.100  
 GPMAN2 SINE.100  
 GPX1 0.00 %  
 GPX2 0.00 %  
 GPY1 0.00 %  
 GPY2 0.00 %  
 GPZ1 10.00 %  
 GPZ2 10.00 %  
 P16 1000.00 usec

F1 - Acquisition parameters  
 MD 1  
 TD 812  
 SFO1 500.1318 MHz  
 FIDRES 8.418642 Hz  
 SW 8.618 ppm

F2 - Processing parameters  
 SI 2048  
 SF 500.1300233 MHz  
 WDW SINE  
 SSB 0  
 LB 0.00 Hz  
 GB 0  
 PC 1.00

F1 - Processing parameters  
 SI 1024  
 MC2 GF  
 SF 500.1300233 MHz  
 WDW SINE  
 SSB 0  
 LB 0.00 Hz  
 GB 0

2D NMR plot parameters  
 CX2 20.00 cm  
 CX1 20.00 cm  
 F2PLD 8.035 ppm  
 F2LD 4018.63 Hz  
 F2PHI -0.583 ppm  
 F2HI -251.71 Hz  
 F1PLD 8.035 ppm  
 F1LD 4018.63 Hz  
 F1PHI -0.583 ppm  
 F1HI -251.71 Hz  
 F2PRMCH 0.43092 ppa/cm  
 F2KZCH 215.51724 Hz/cm  
 F1PRMCH 0.43092 ppa/cm  
 F1KZCH 215.51724 Hz/cm

Peter Jervis Sample 04/10/05 in CDCl3 at +27C, set temp  
drx500, Gradient HSGC

⊕ Impurity

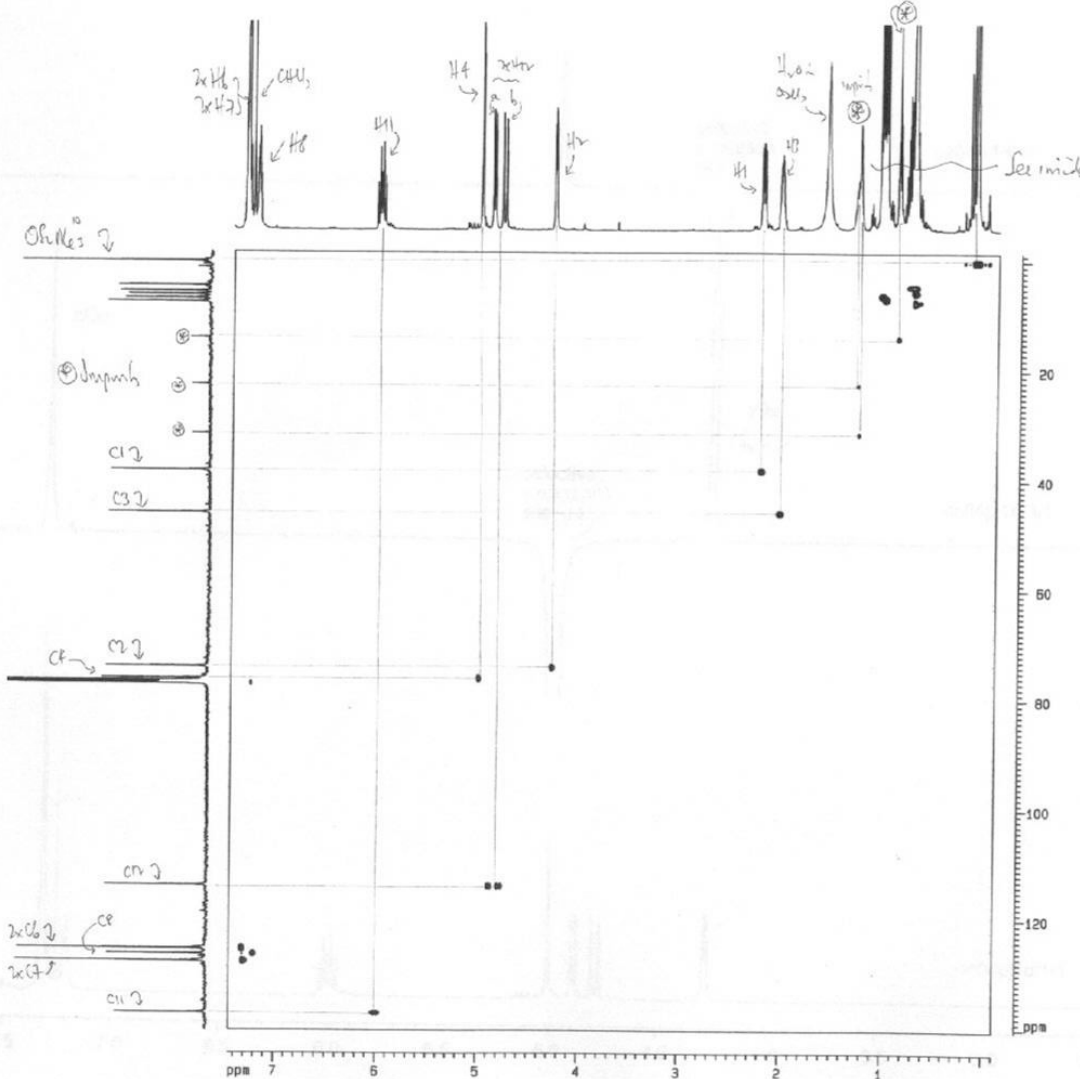

Current Data Parameters  
 NAME cc04p116  
 EXPNO 2  
 PROCNO 1

F2 - Acquisition Parameters  
 Date\_ 20051004  
 Time 15.35  
 INSTRUM drx500  
 PROBHD 5 mm TBI H/C  
 PULPROG invgpgp  
 TO 20.48  
 SOLVENT CDCl3  
 NS 8  
 DS 8  
 SWH 431.345 Hz  
 FIDRES 2.104661 Hz  
 AQ 0.2376180 sec  
 RG 32788  
 DM 150.000 usec  
 DE 9.50 usec  
 TE 300.0 K  
 CHET2 145.000000  
 d0 0.0000300 sec  
 d1 2.0000000 sec  
 d4 0.00172414 sec  
 d11 0.0000000 sec  
 d13 0.0000300 sec  
 d18 0.0001000 sec  
 d20 0.0011000 sec  
 d21 0.00061714 sec  
 dM0 0.00001140 sec

CHANNEL F1  
 NUC1 1H  
 P1 19.70 usec  
 p2 21.40 usec  
 PL1 1.00 dB  
 SFO1 500.130087 MHz

CHANNEL F2  
 CPDPRG2 gprp  
 NUC2 13C  
 P2 12.00 usec  
 p4 24.00 usec  
 PCPD2 78.00 usec  
 PL2 -1.00 dB  
 PL3 15.00 dB  
 SFO2 125.7677693 MHz

GRADIENT CHANNEL  
 GRANA1 SINE 100  
 GRANA2 SINE 100  
 GRANA3 SINE 100  
 GPC1 0.00 %  
 GPC2 0.00 %  
 GPC3 0.00 %  
 GPT1 0.00 %  
 GPT2 0.00 %  
 GPT3 0.00 %  
 GPT4 80.00 %  
 GPT5 30.00 %  
 GPC5 20.00 %  
 P16 1000.00 usec

F1 - Acquisition parameters  
 NS0 4  
 TO 512  
 SFO1 125.7698 MHz  
 FIDRES 42.831888 Hz  
 SW 174.389 pps

F2 - Processing parameters  
 SI 20.48  
 SF 500.1300233 MHz  
 WM 95196  
 SSB 2  
 LB 0.00 Hz  
 GB 0  
 PC 1.00

F1 - Processing parameters  
 SI 1024  
 MC2 TP2  
 SF 125.7677640 MHz  
 WM 95196  
 SSB 2  
 LB 0.00 Hz  
 GB 0

2D NMR plot parameters  
 CX2 17.00 ca  
 CX1 17.00 ca  
 F2PLD 7.490 ppm  
 F2LD 3726.00 Hz  
 F2PHI -9.104 ppm  
 F2HG -51.78 Hz  
 F2PLD 140.484 ppm  
 F2LD 17088.20 Hz  
 F2PHI -1.531 ppm  
 F2HG -192.56 Hz  
 F2PHICH 0.44434 pps/ca  
 F2PHCN 232.22740 Hz/ca  
 F2PHCH 8.25444 pps/ca  
 F2HZCH 1000.03611 Hz/ca

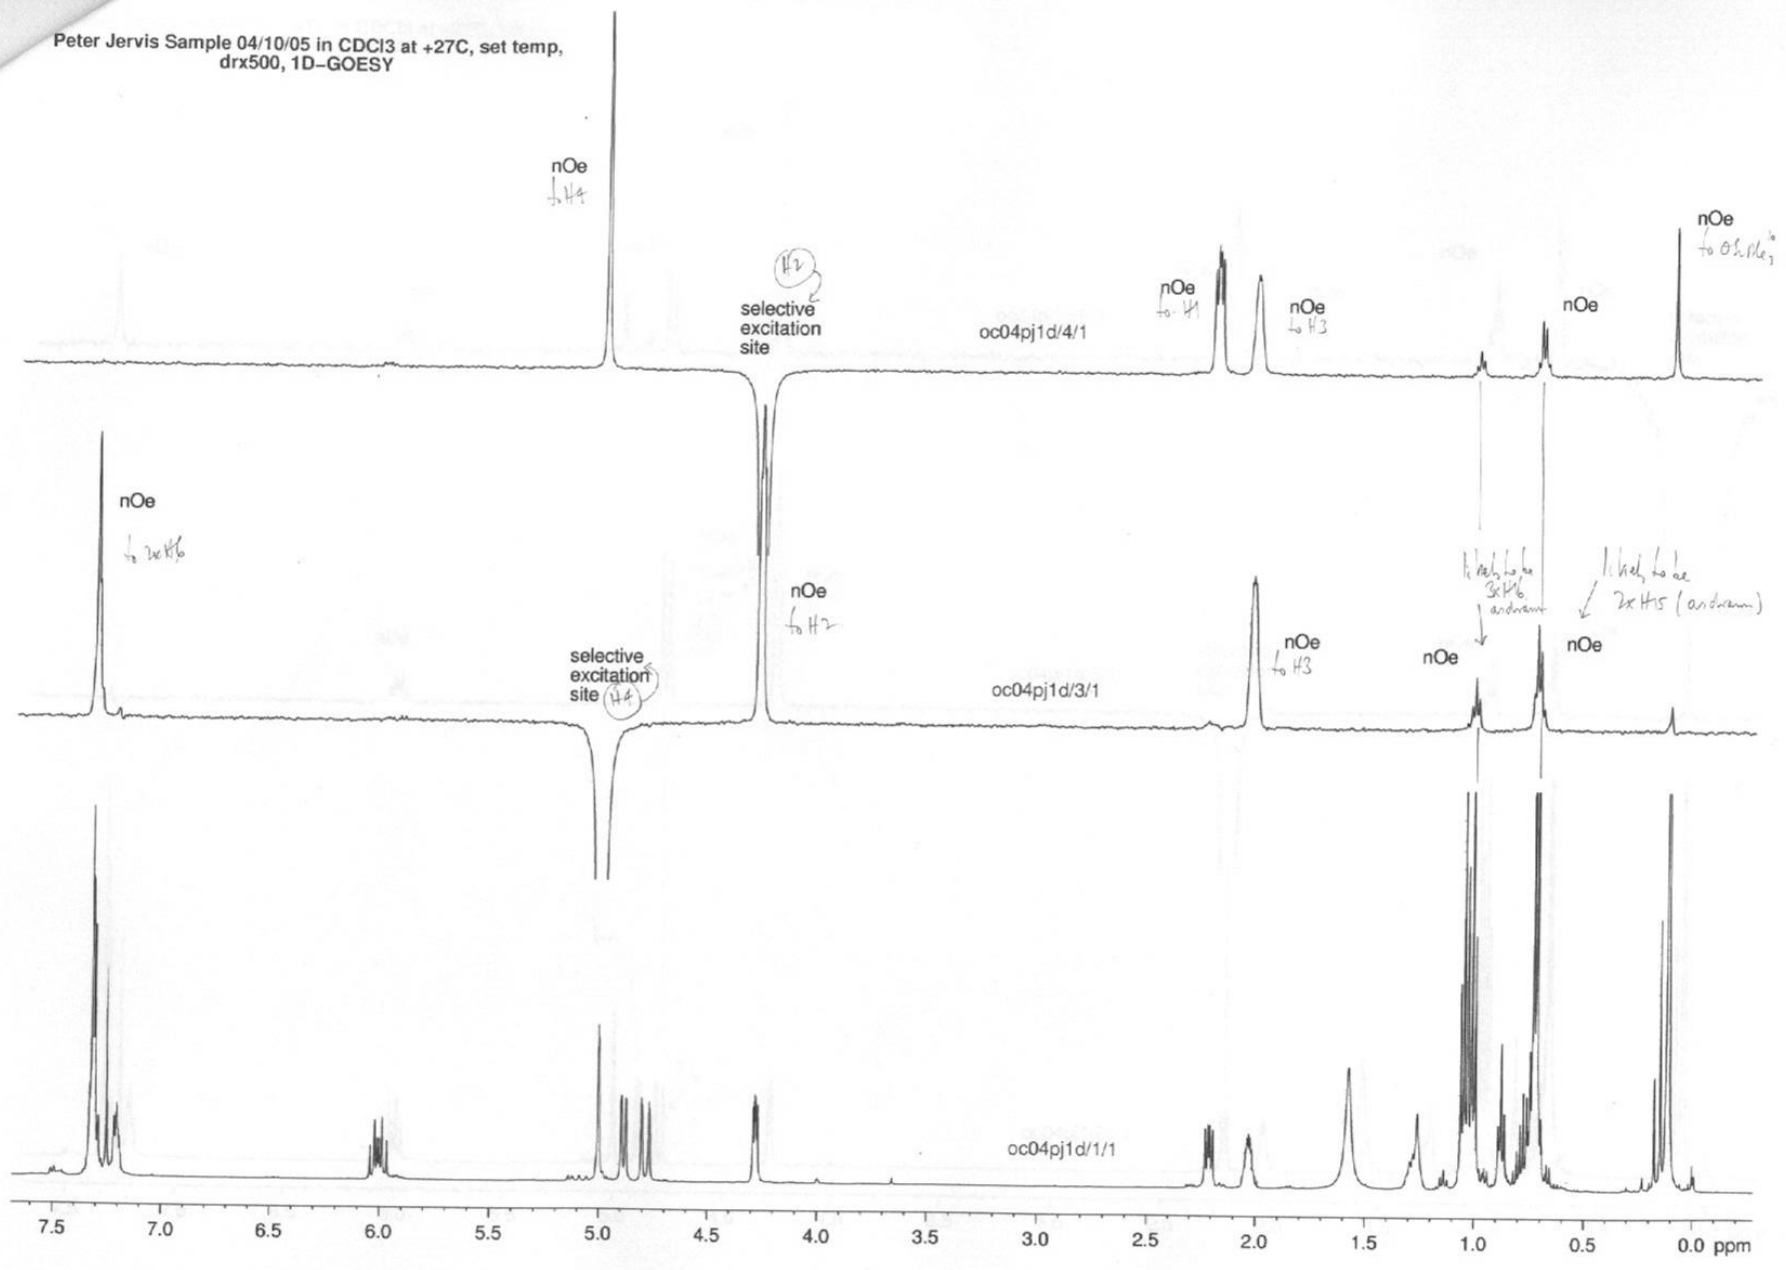

Peter Jervis Sample 04/10/05 in CDCl3 at +27C, set temp,  
drx500, 1D-GOESY

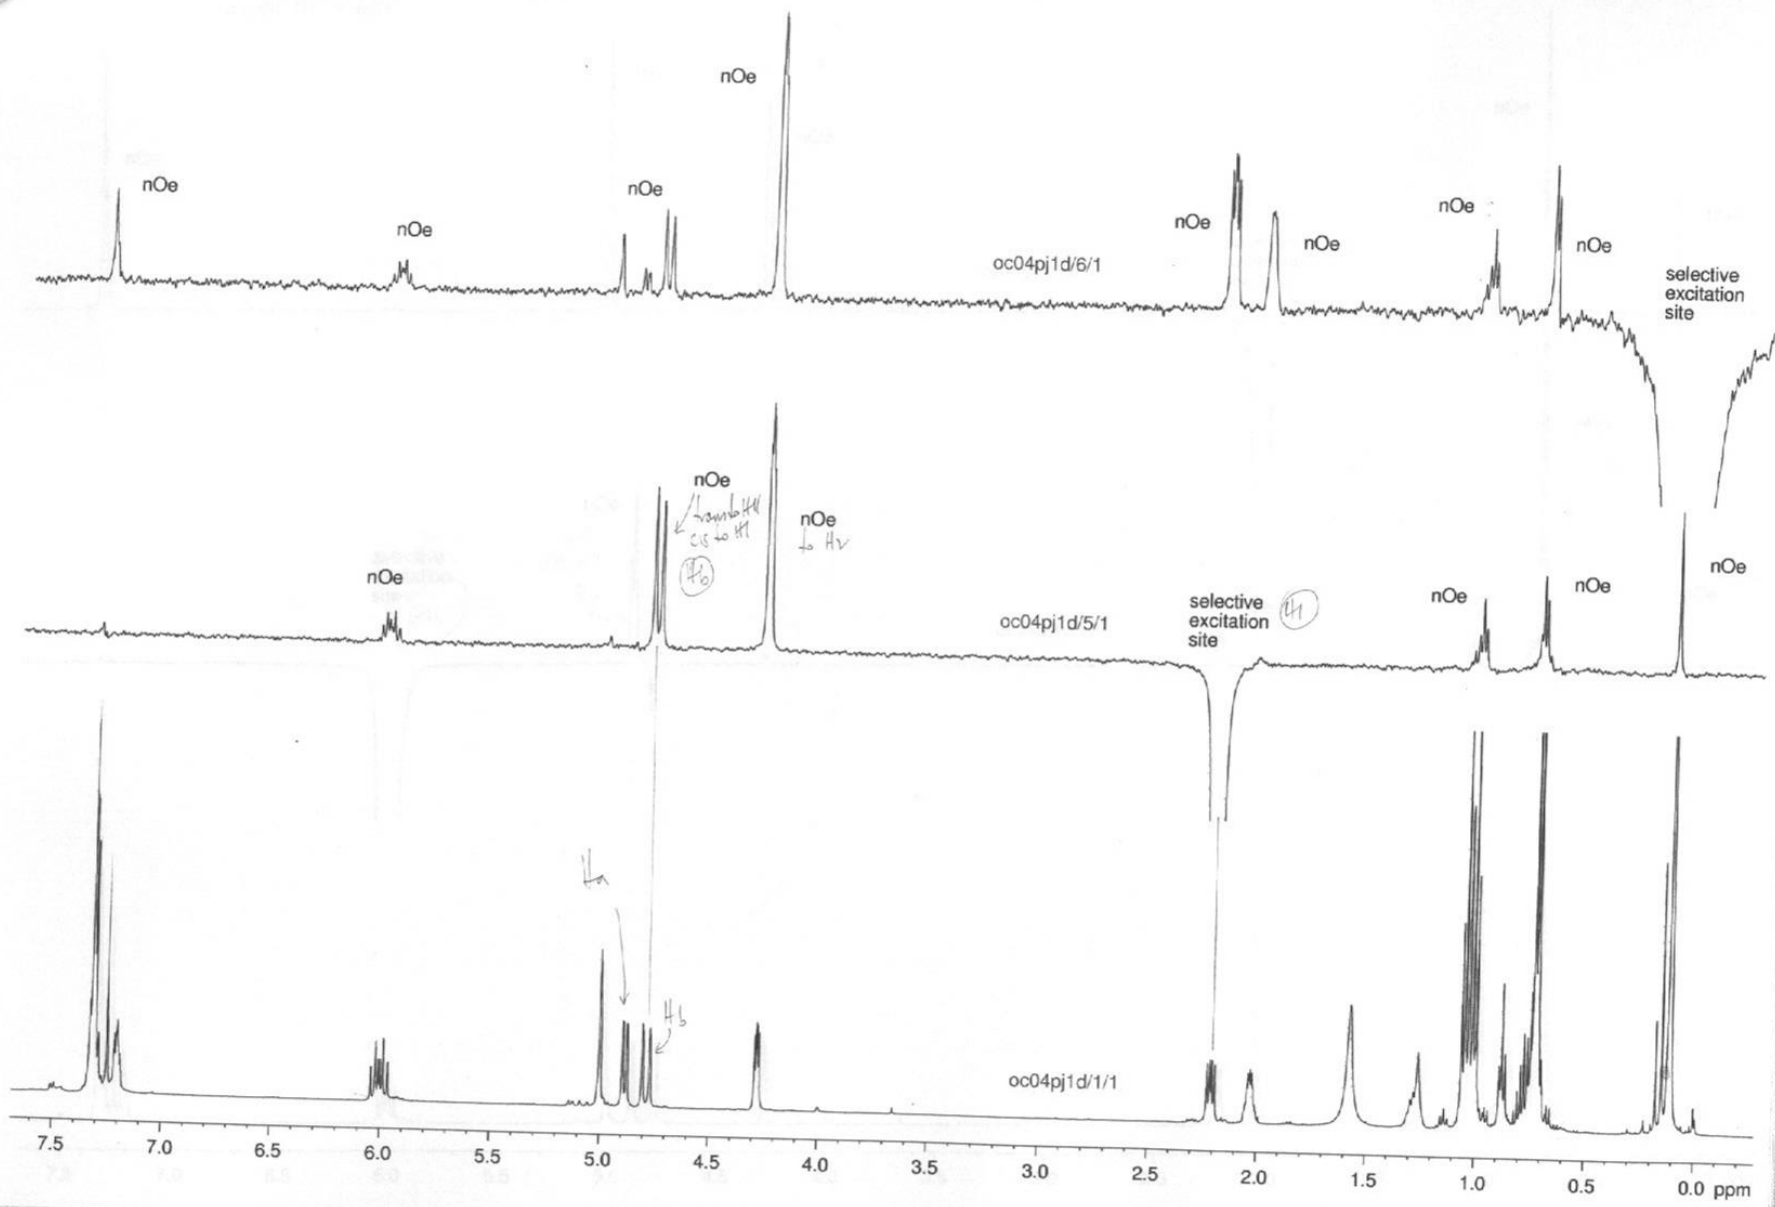

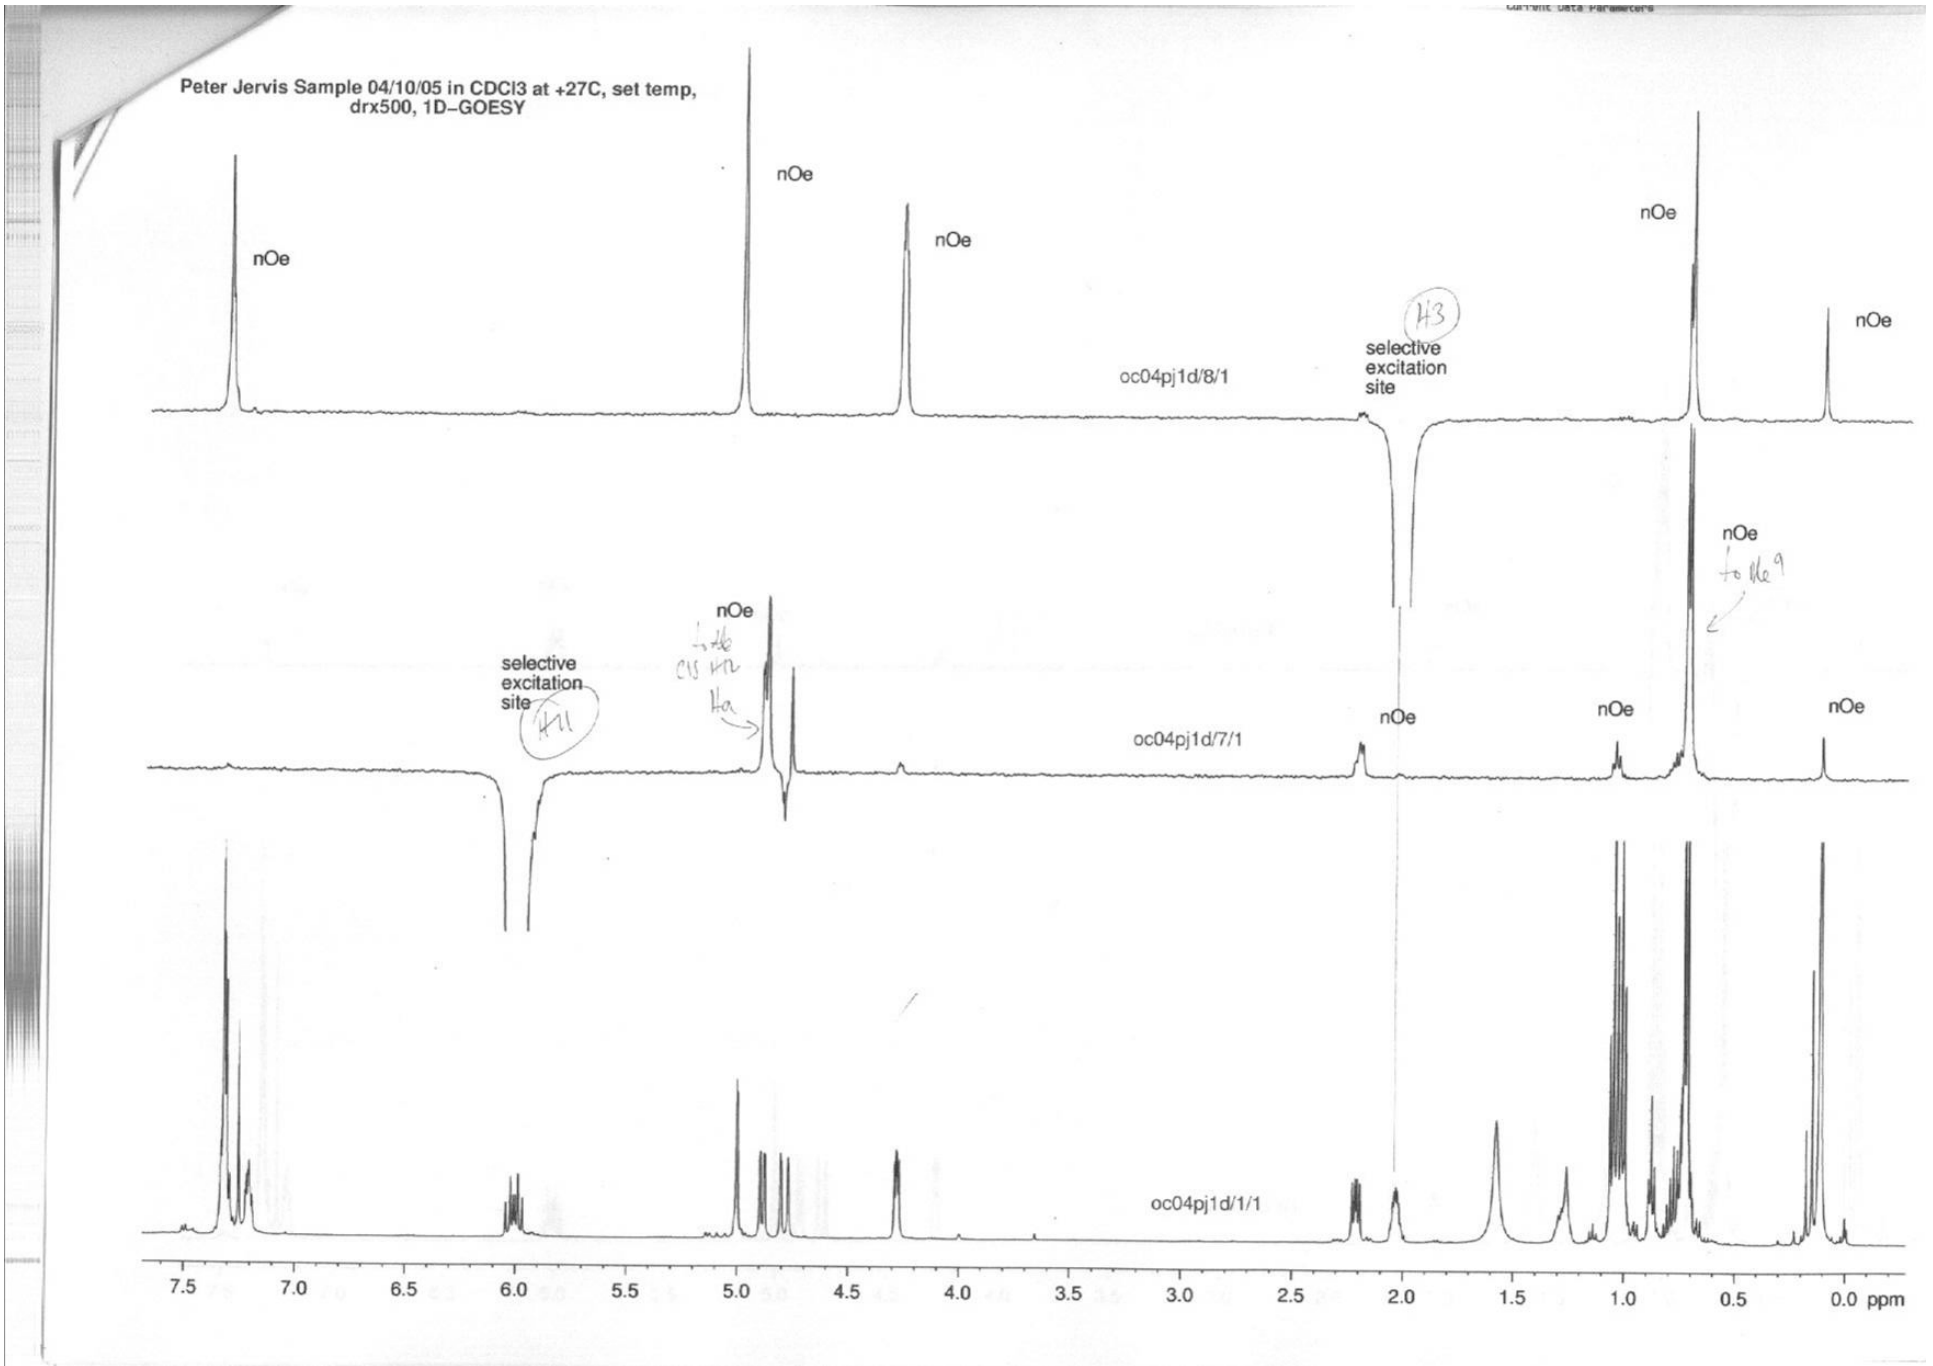



Peter Jervis Sample 04/10/05 in CDCl3 at +27C, set temp,  
drx500, 1D-GOESY

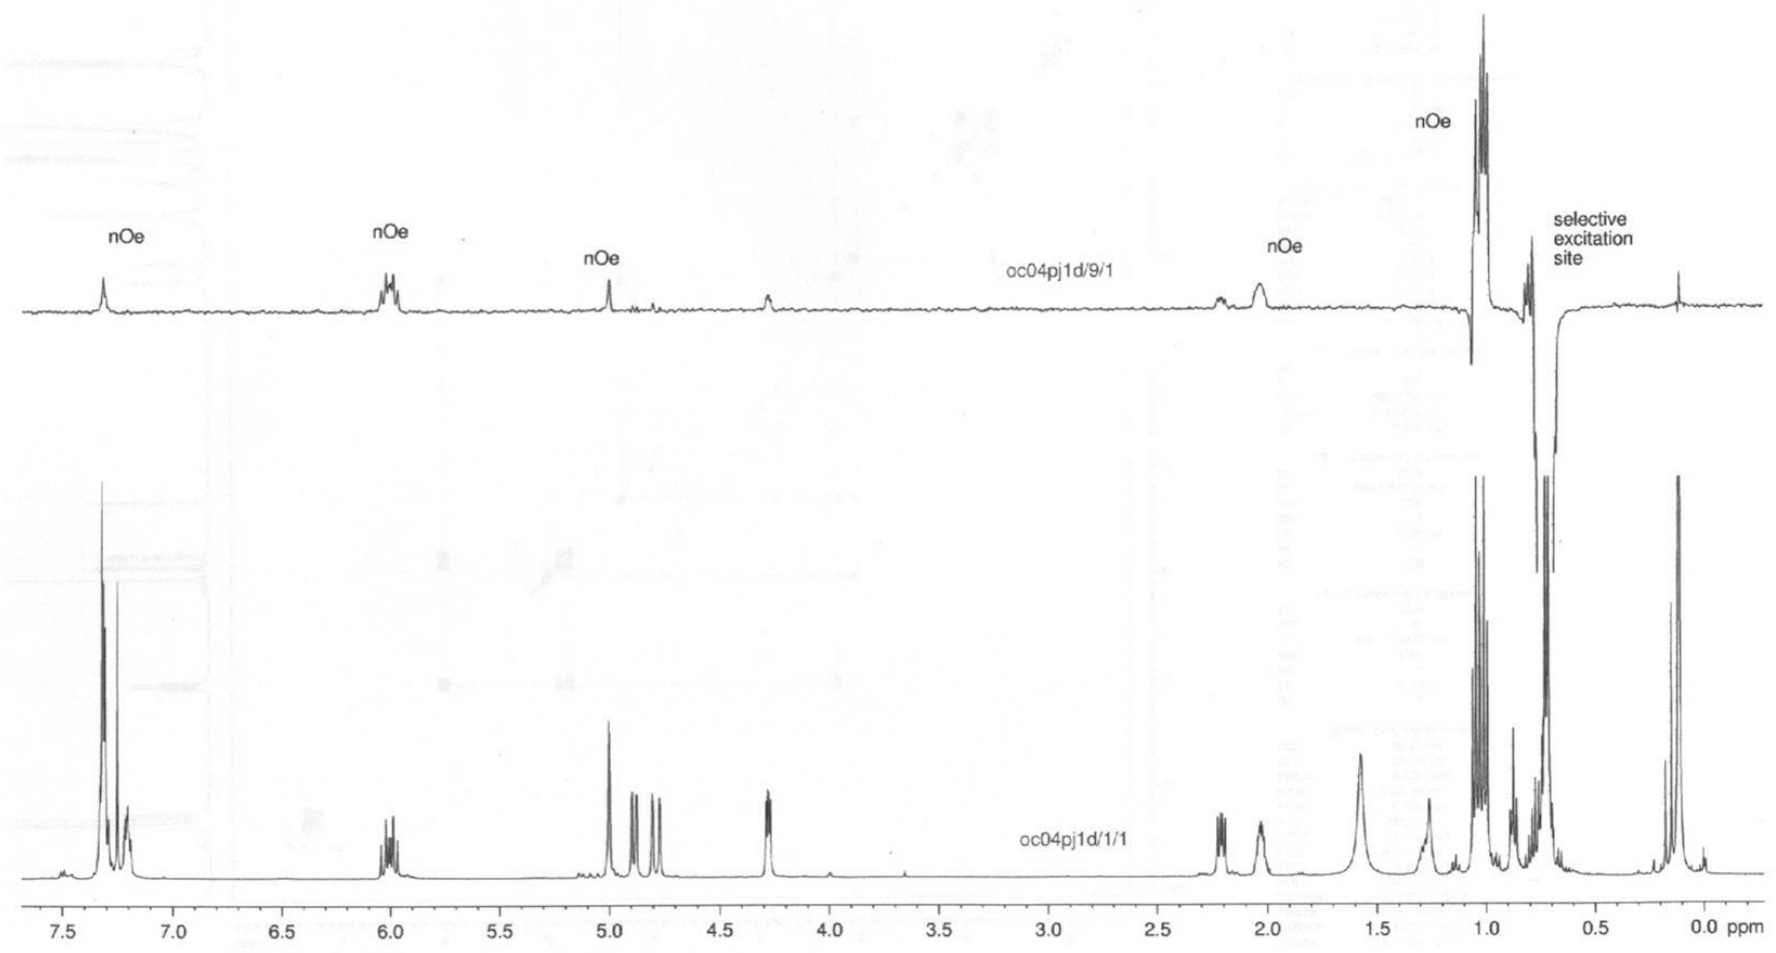

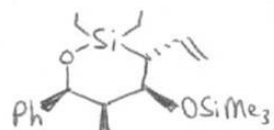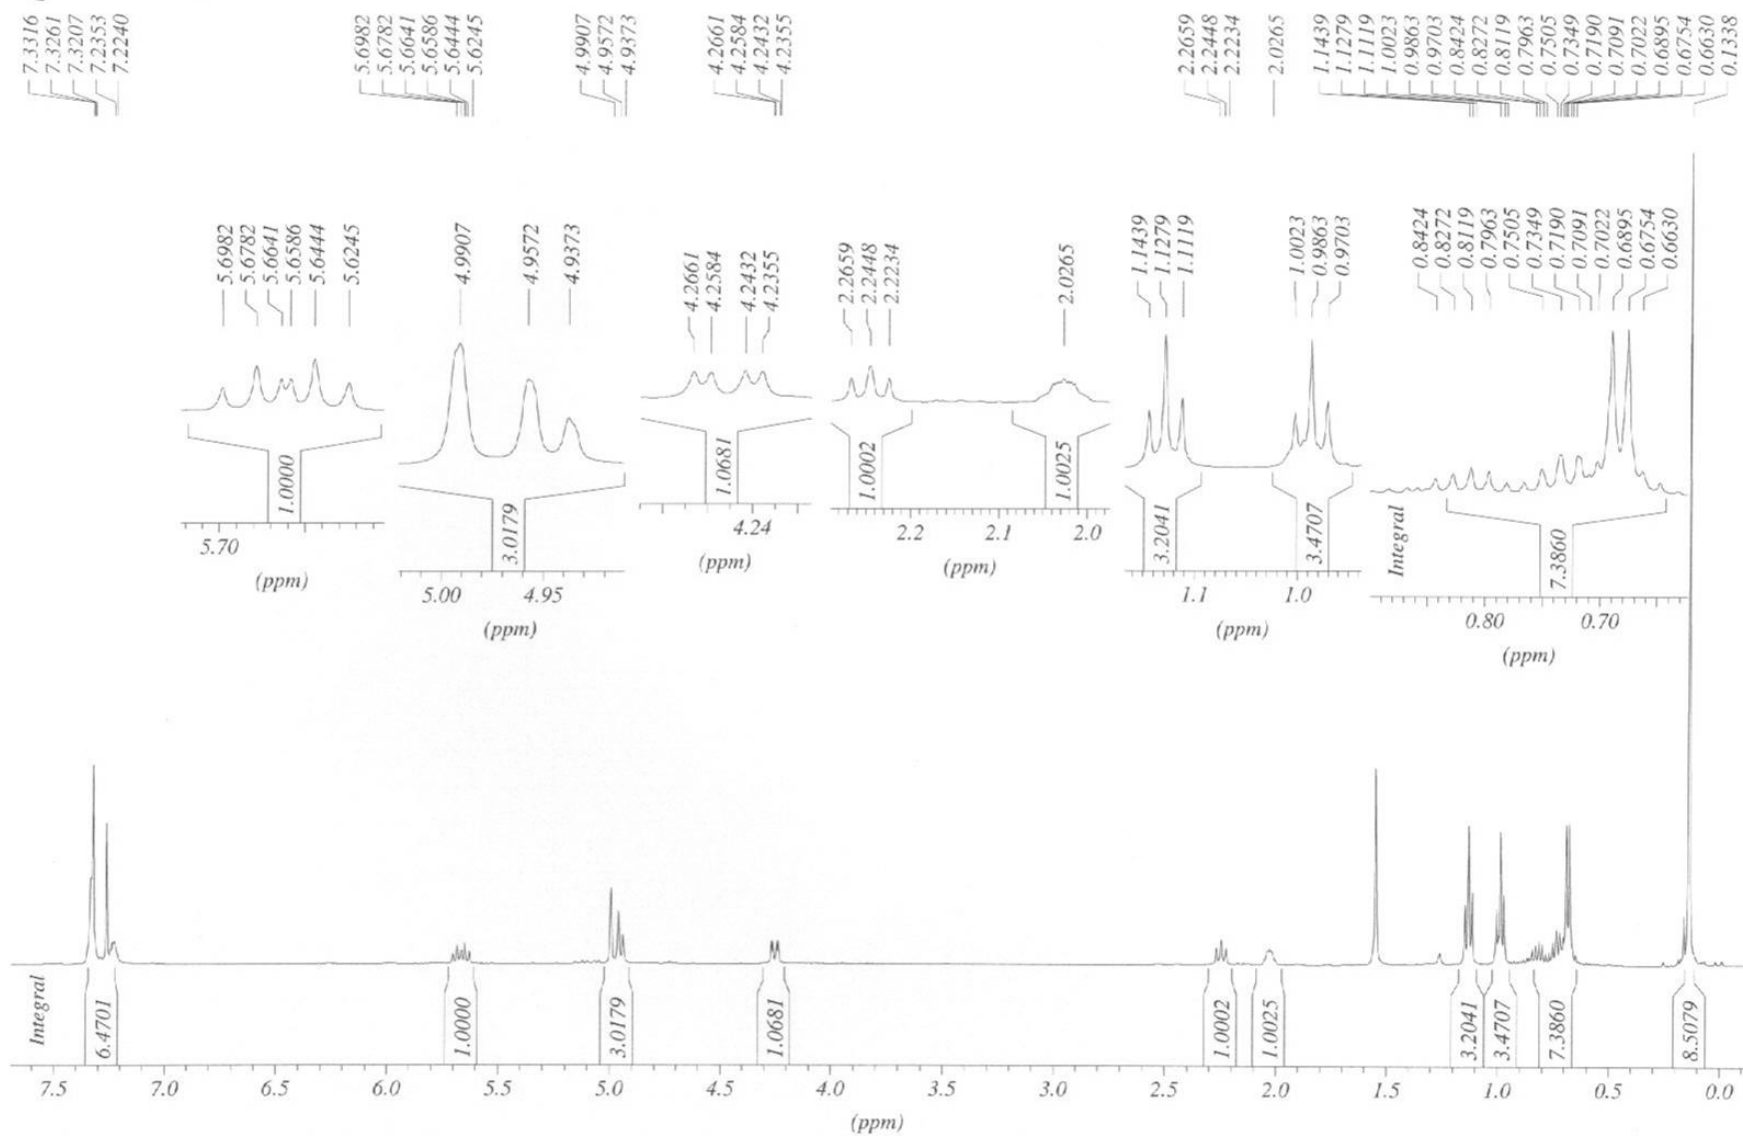

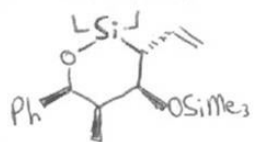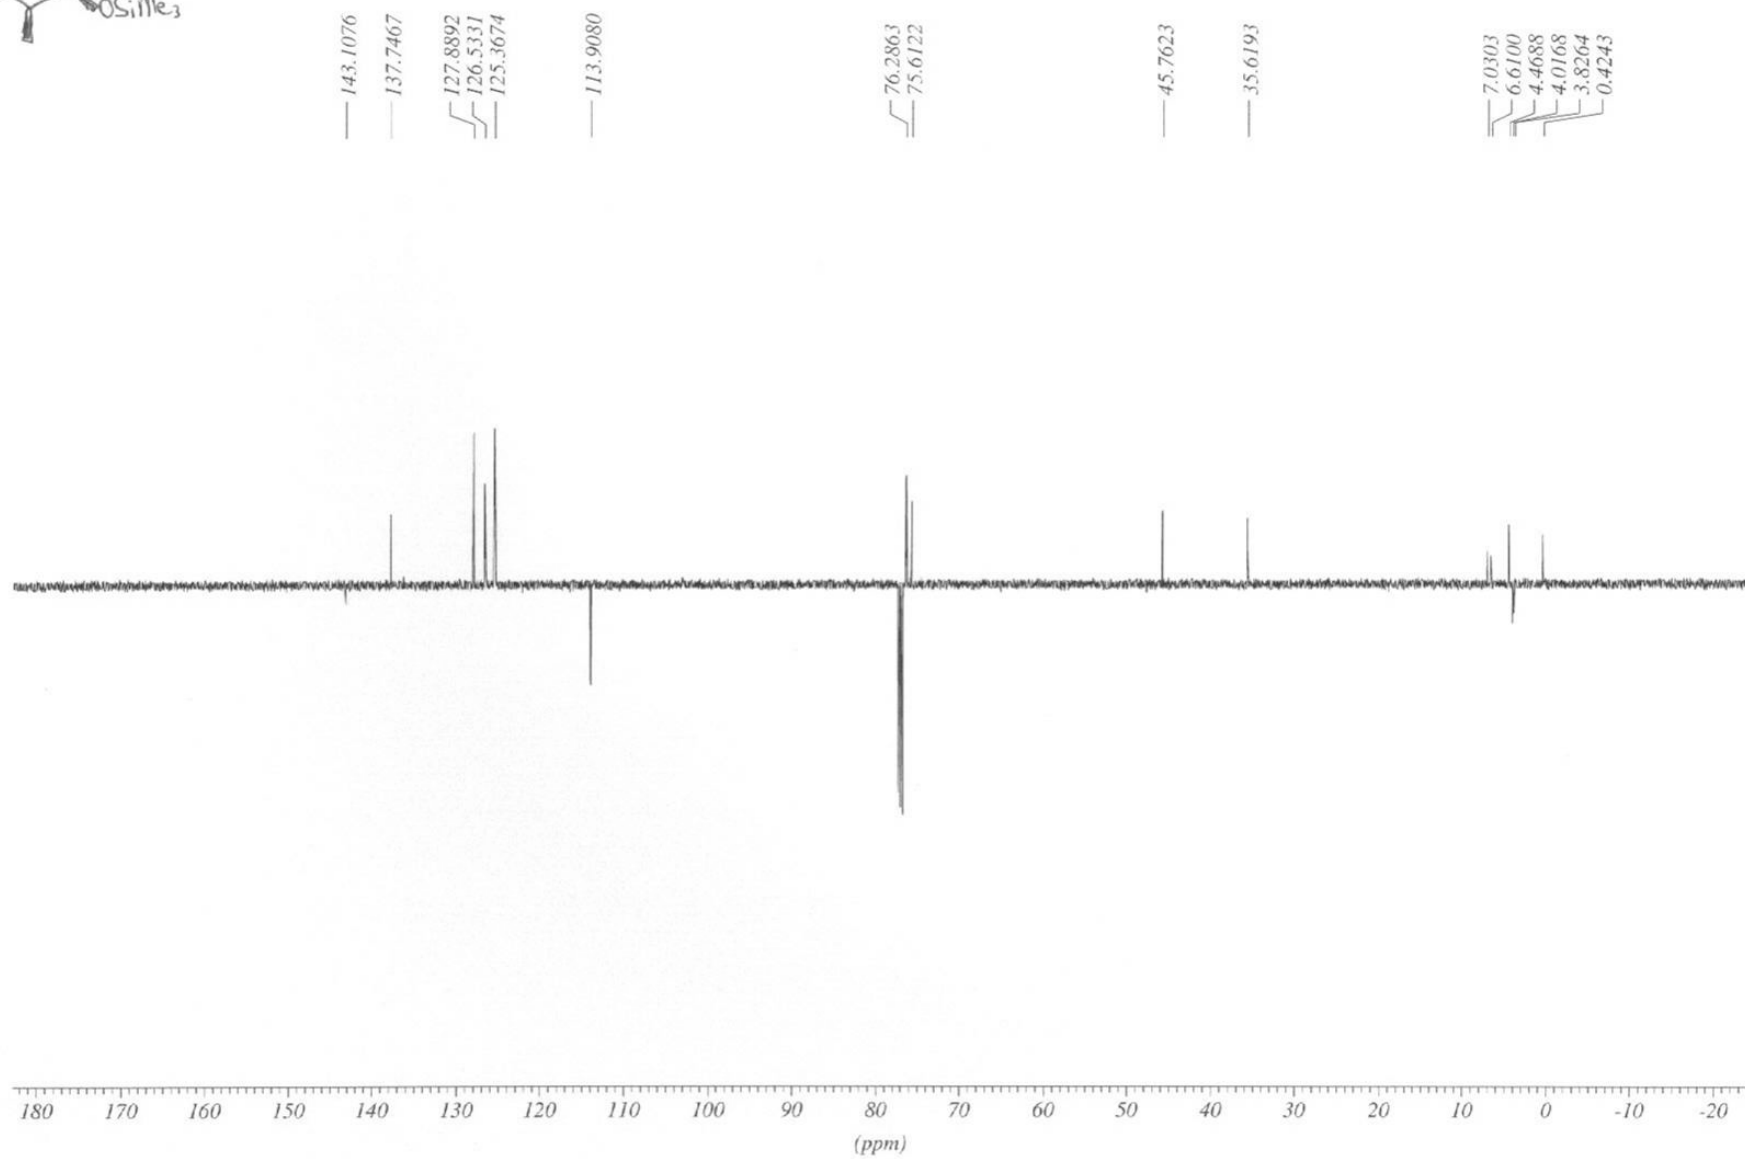

Peter Jarvis Barcode 3905 in CDC13 at +27C, set temp  
dix500, Gradient COSY90

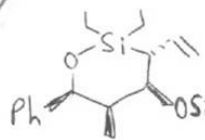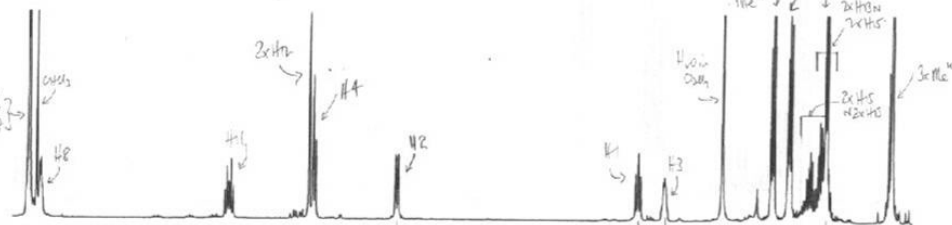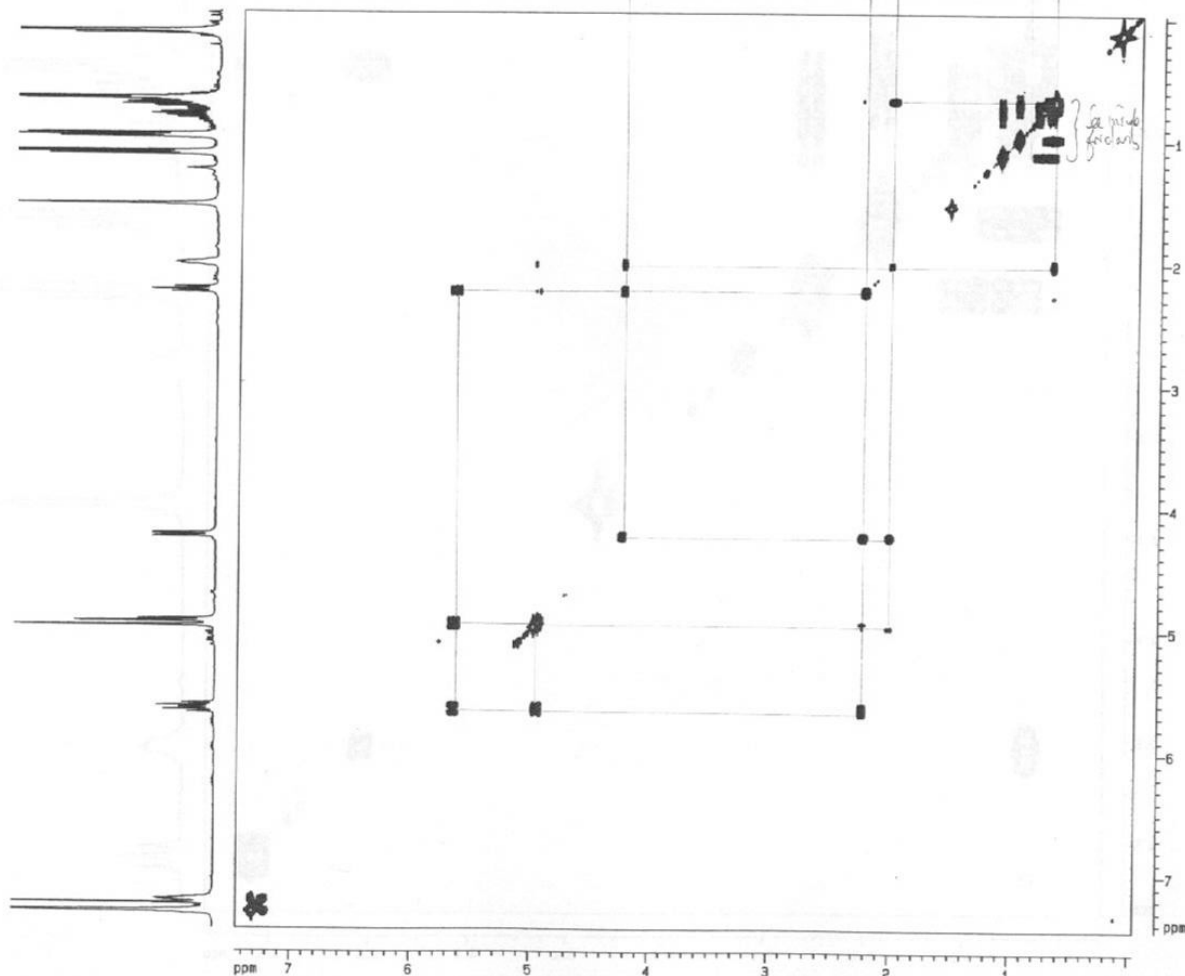

Current Data Parameters  
NAME j12epj1d  
EXPNO 3  
PROCNO 1

F2 - Acquisition Parameters

Date\_ 20050725  
Time 19.47  
INSTRUM dix500  
PROBHD 5 mm TBI H/C  
PULPROG cosygp  
TD 2048  
SOLVENT CDC13  
NS 8  
DS 16  
SWH 4310.345 Hz  
FIDRES 2.1046651 Hz  
AQ 0.2375180 sec  
RG 485.1  
DM 115.000 usec  
DE 5.50 usec  
TE 300.0 K  
d0 0.00000300 sec  
D1 2.00000000 sec  
d13 0.00000300 sec  
D15 0.00010000 sec  
IN0 0.00023200 sec

----- CHANNEL f1 -----

NUC1 1H  
P0 10.80 usec  
P1 10.80 usec  
PL1 1.00 dB  
SFO1 500.131867 MHz

----- GRADIENT CHANNEL -----

GRNAM1 SINE.100  
GRNAM2 SINE.100  
SPX1 0.00 %  
SPX2 0.00 %  
SPY1 0.00 %  
SPY2 0.00 %  
SPZ1 10.00 %  
SPZ2 10.00 %  
P16 1000.00 usec

F1 - Acquisition parameters

MD0 1  
TD 512  
SFO1 500.1318 MHz  
FIDRES 8.418642 Hz  
SW 8.618 ppm

F2 - Processing parameters

SI 2048  
SF 500.1300233 MHz  
WDW SINE  
SSB 0  
LB 0.00 Hz  
GB 0  
PC 1.00

F1 - Processing parameters

SI 1024  
MC2 GF  
SF 500.1300233 MHz  
WDW SINE  
SSB 0  
LB 0.00 Hz  
GB 0

2D NMR plot parameters

CX2 20.00 cm  
CX1 20.00 cm  
F2PL0 7.450 ppm  
F2L0 3726.06 Hz  
F2PHI -0.049 ppm  
F2PHI -24.42 Hz  
F1PL0 7.454 ppm  
F1L0 3728.19 Hz  
F1PHI -0.036 ppm  
F1PHI -18.11 Hz  
F2PPMCM 0.37485 ppm/cm  
F2HZCM 187.52527 Hz/cm  
F1PPMCM 0.37453 ppm/cm  
F1HZCM 187.31480 Hz/cm

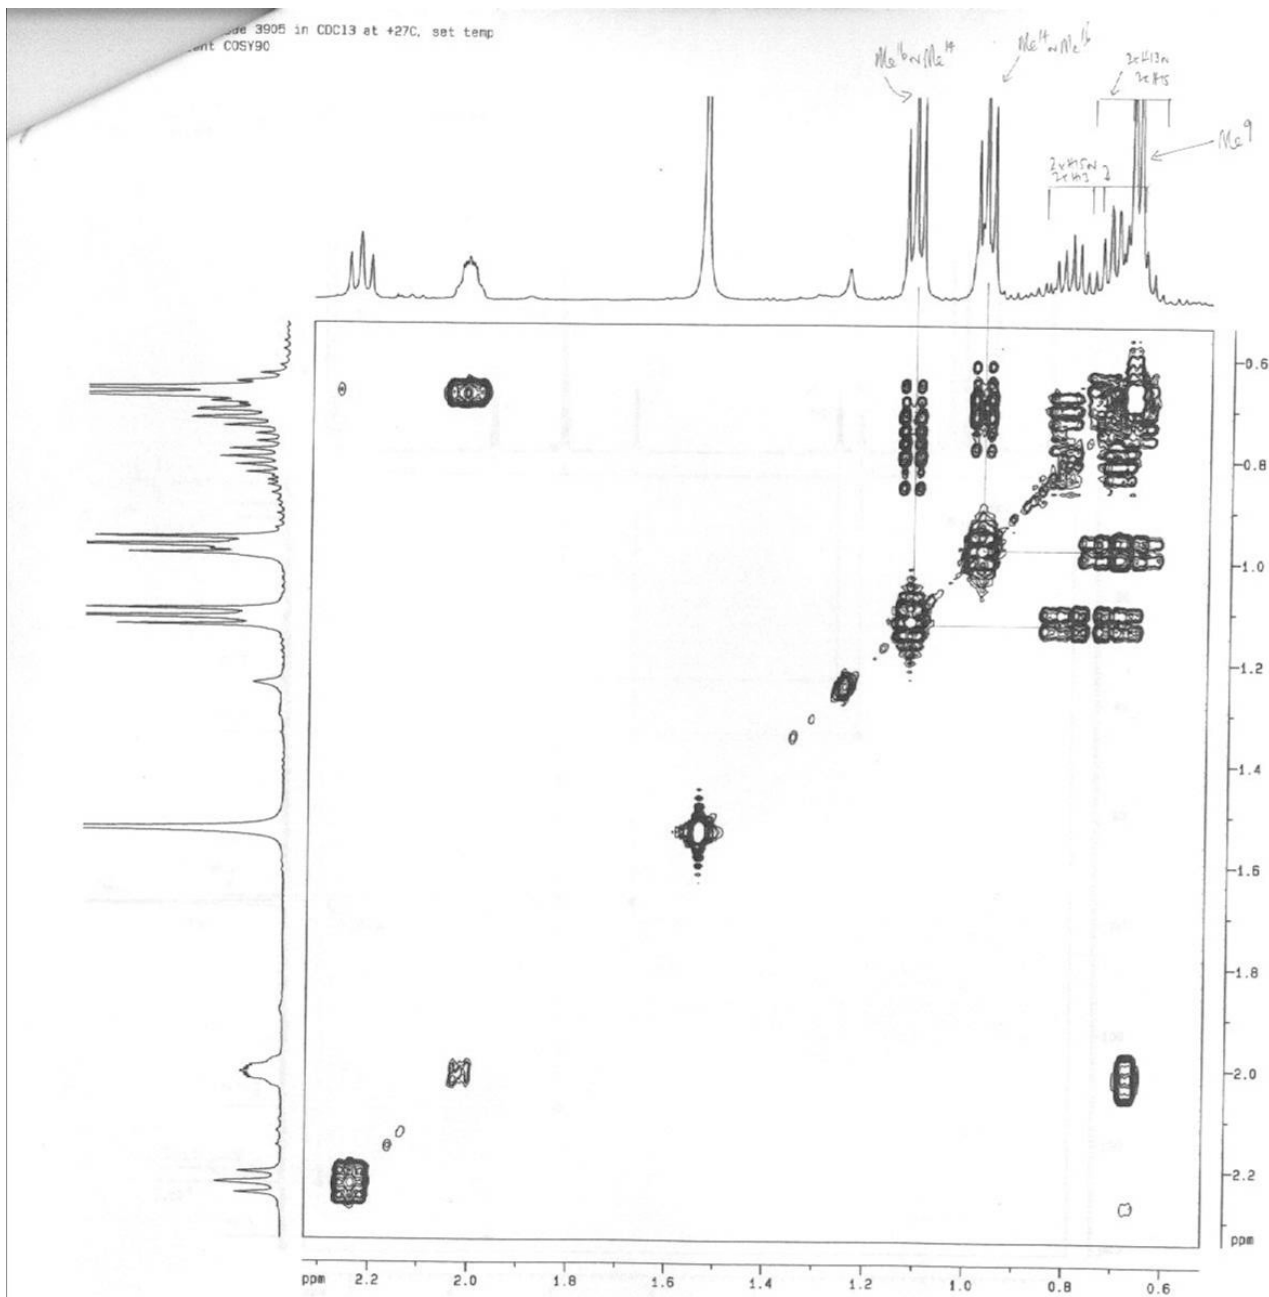

Peter Jarvis Barcode 3905 in CDCl3 at +27C, set temp  
dix500, Gradient HSGC

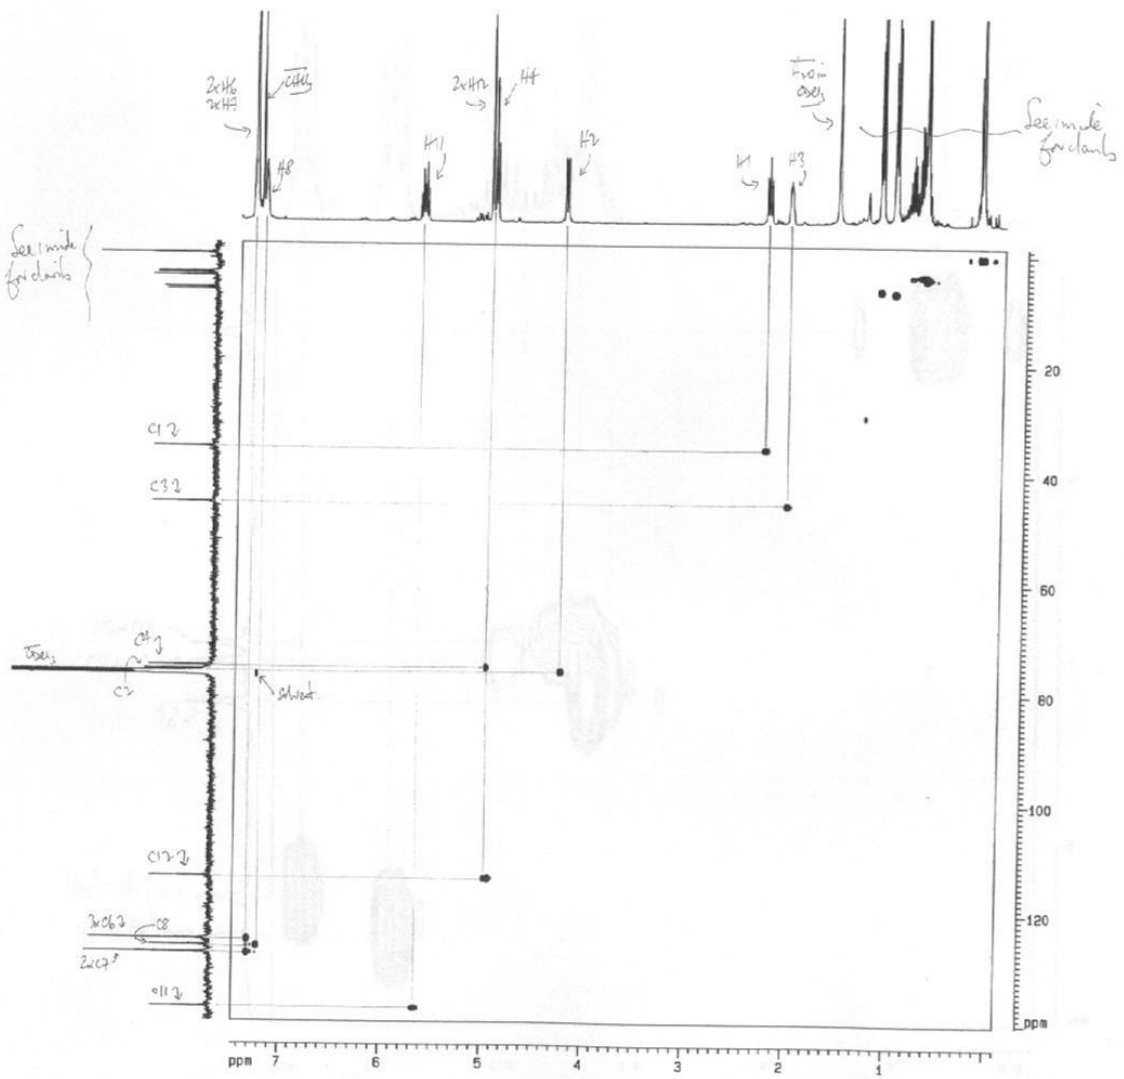

```

Current Data Parameters
NAME      11209j10
EXPNO    2
PROCNO   1

F2 - Acquisition Parameters
Date_    20050705
Time     17.12
INSTRUM  spect
PROBHD   5 mm TBI H/C
PULPROG  invgpgp
TD        2048
SOLVENT  CDCl3
NS        8
DS        18
SFO1     4310.345 Hz
FIDRES   2.104681 Hz
AQ        0.2376180 sec
RG        32788
SWH       118.000 usec
DE        0.50 usec
TE        300.2 K
CMST2    1.45.000000
D0        0.0000000 sec
D1        2.0000000 sec
S4        0.00172414 sec
d11       0.0300000 sec
d15       0.0000000 sec
d16       0.0010000 sec
d20       0.0010000 sec
d21       0.00081714 sec
IND       0.00001140 sec

----- CHANNEL f1 -----
NUC1      1H
P1        10.00 usec
pR        21.20 usec
PL1       1.00 dB
SFO1     500.1319887 MHz

----- CHANNEL f2 -----
CPDPRG2   gpgp
NUC2      13C
P2        12.00 usec
pR        24.00 usec
PL2       78.00 usec
PL3       -1.00 dB
PL13      15.00 dB
SFO2     125.7687889 MHz

----- GRADIENT CHANNEL -----
GPMAX1    SINE.100
GPMAX2    SINE.100
GPMAX3    SINE.100
GPI1      0.00 %
GPI2      0.00 %
GPI3      0.00 %
GPI4      0.00 %
GPI5      0.00 %
GPI6      80.00 %
GPI7      30.00 %
GPI8      20.10 %
P16       1000.00 usec

F1 - Acquisition parameters
NOI        4
TO         512
SFO1     125.7688 MHz
FIDRES   42.831888 Hz
SW        174.369 ppm

F2 - Processing parameters
SI         2048
SF        500.1300233 MHz
WDW        SINE
SSB        2
LB         0.00 Hz
GB         0
PC         1.00

F1 - Processing parameters
SI         1024
HC2       TWP1
SF        125.7577945 MHz
WDW        SINE
SSB        2
LB         0.00 Hz
GB         0

2D NMR plot parameters
CQ2       17.00 cm
CQ1       17.00 cm
F1PLD     7.483 ppm
F2C1     3732.40 Hz
F2PC1    -0.184 ppm
F2HC1    -81.78 Hz
F1PLD    140.324 ppm
F1LD     1740.84 Hz
F1PC1    -1.031 ppm
F1HC1    -180.86 Hz
F2PCMCN  0.4408 ppm/cm
F2HCMCN  22.5980 Hz/cm
F1PCMCN  0.34442 ppm/cm
F1HCMCN  1040.37634 Hz/cm

```

Peter Jervis Barcode 3905 in COC13 at +27C, set temp  
dpx500, Gradient HSGC

[See coupling 11/15, 14/13 pairs]

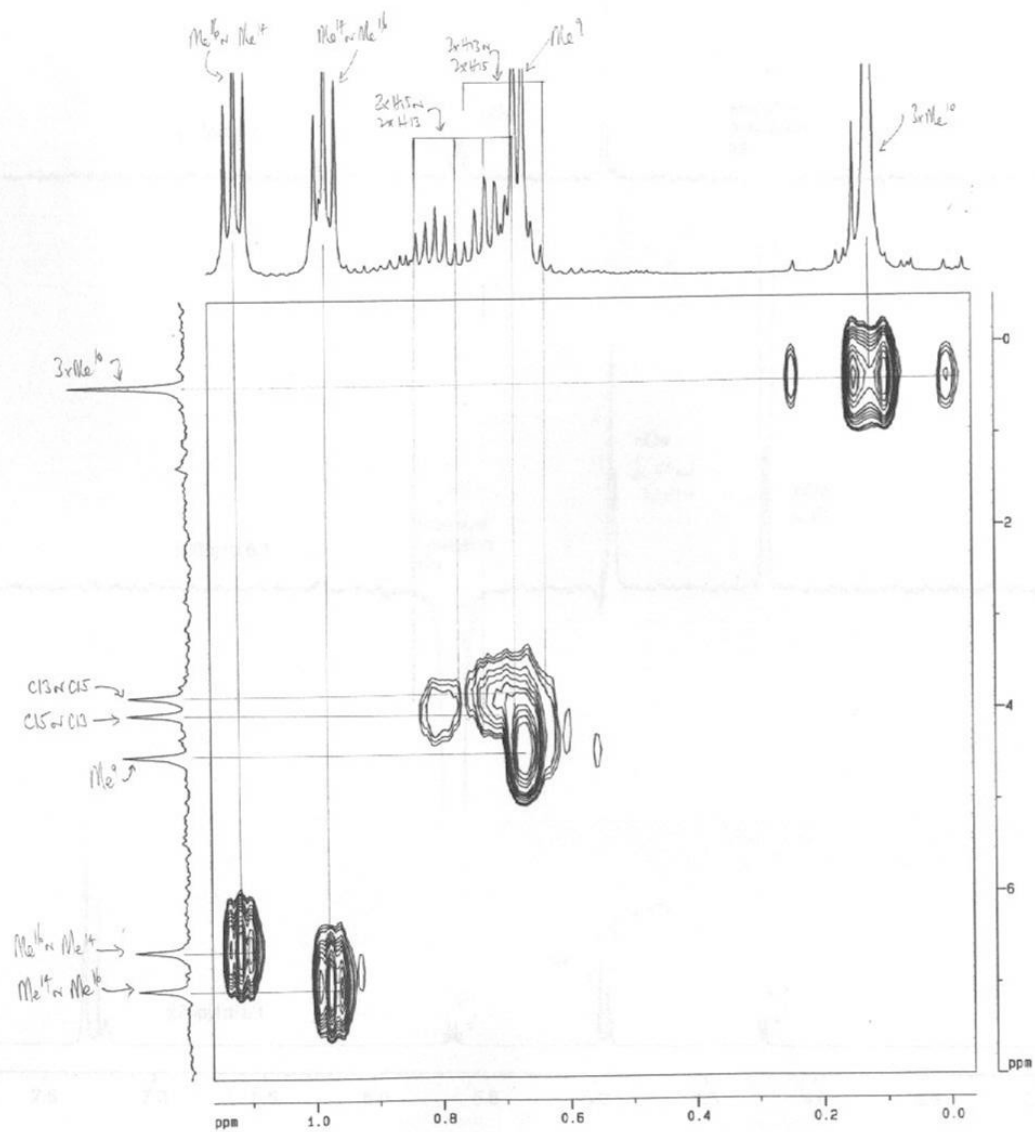

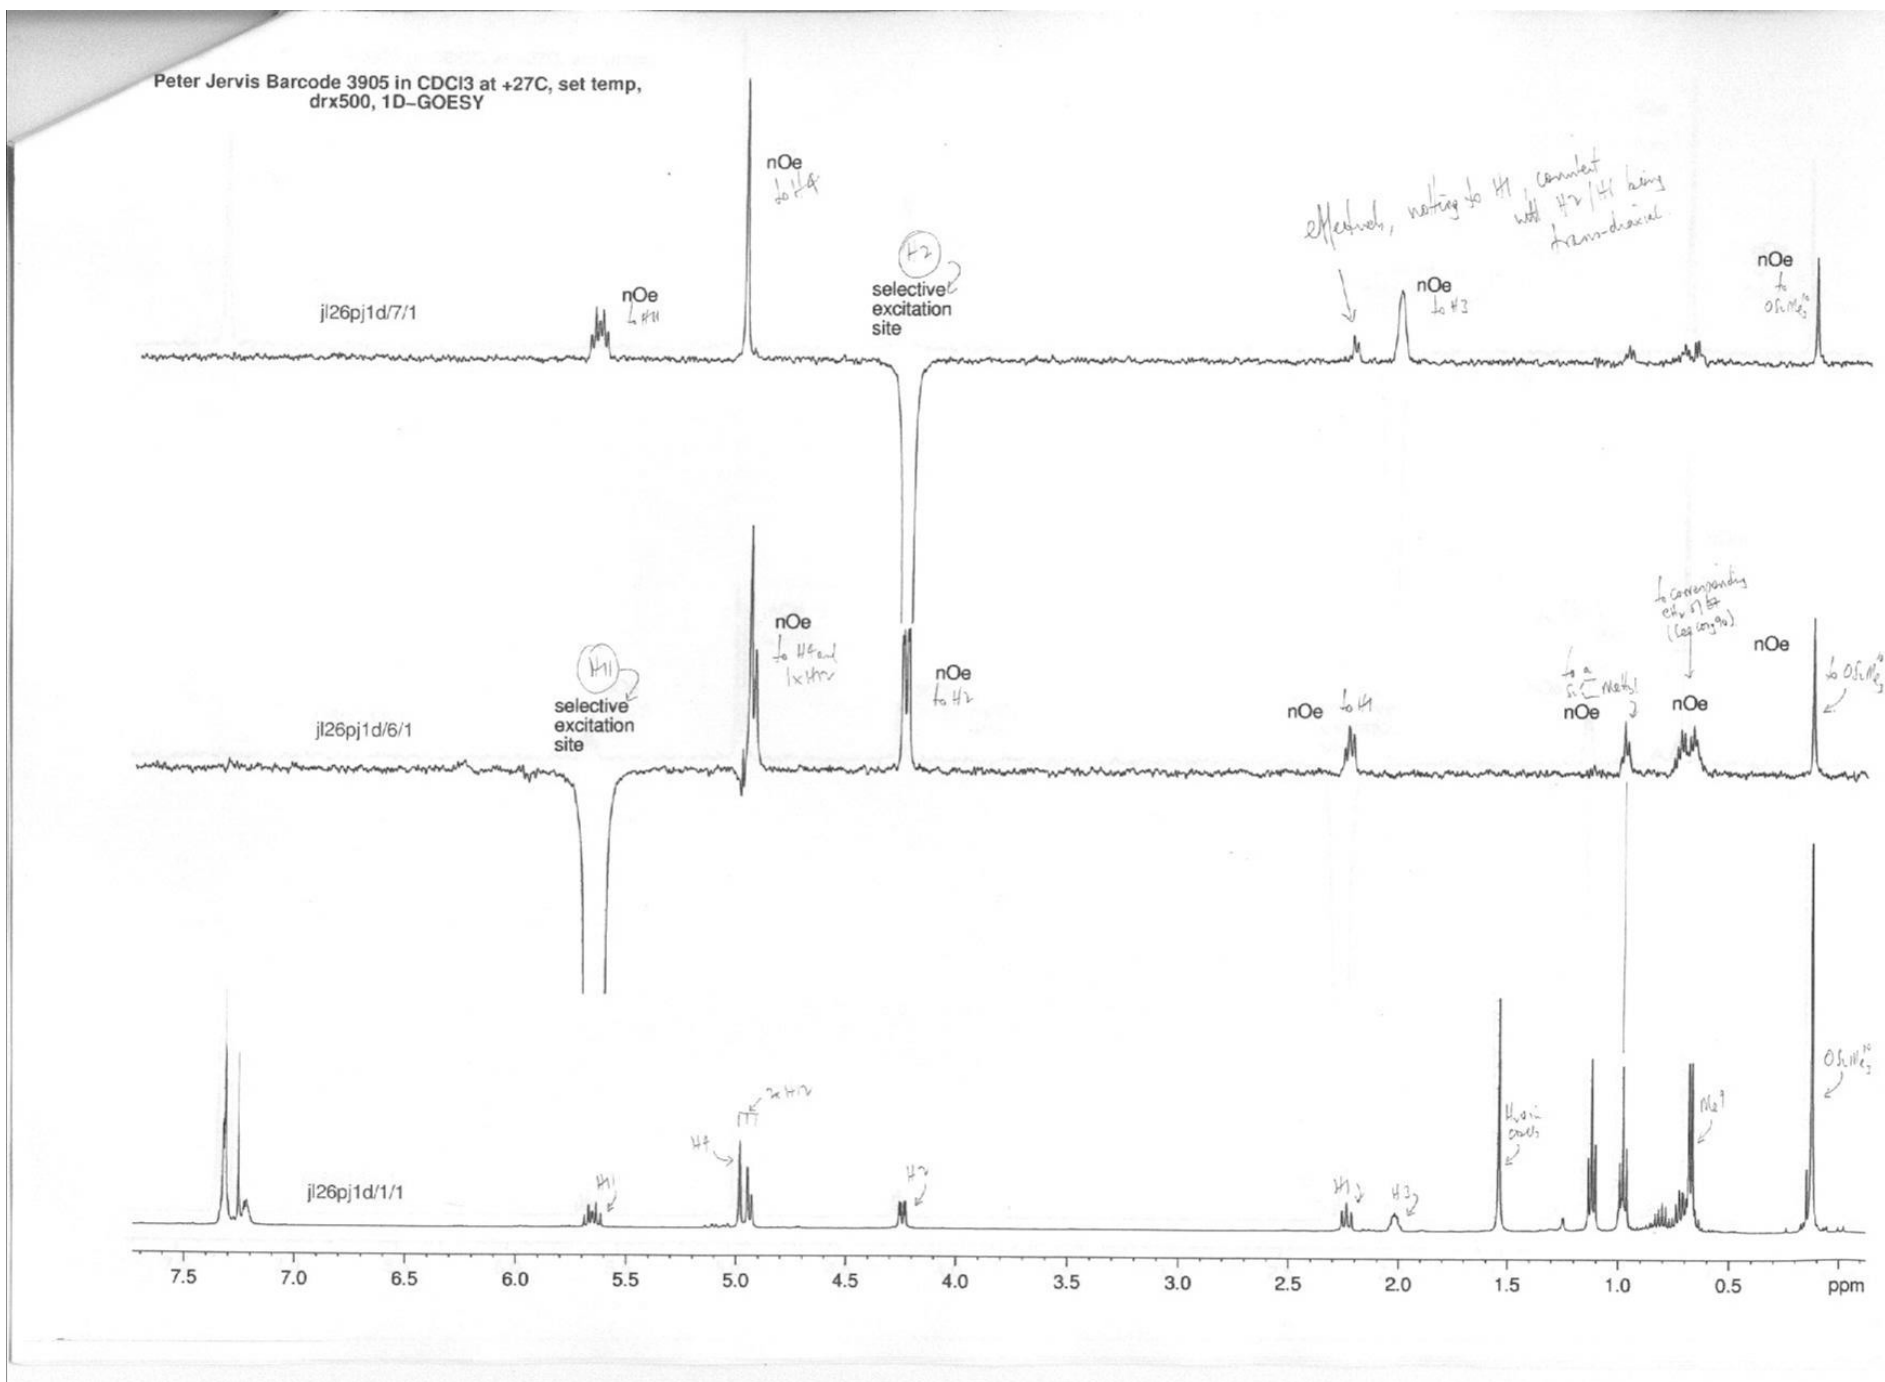



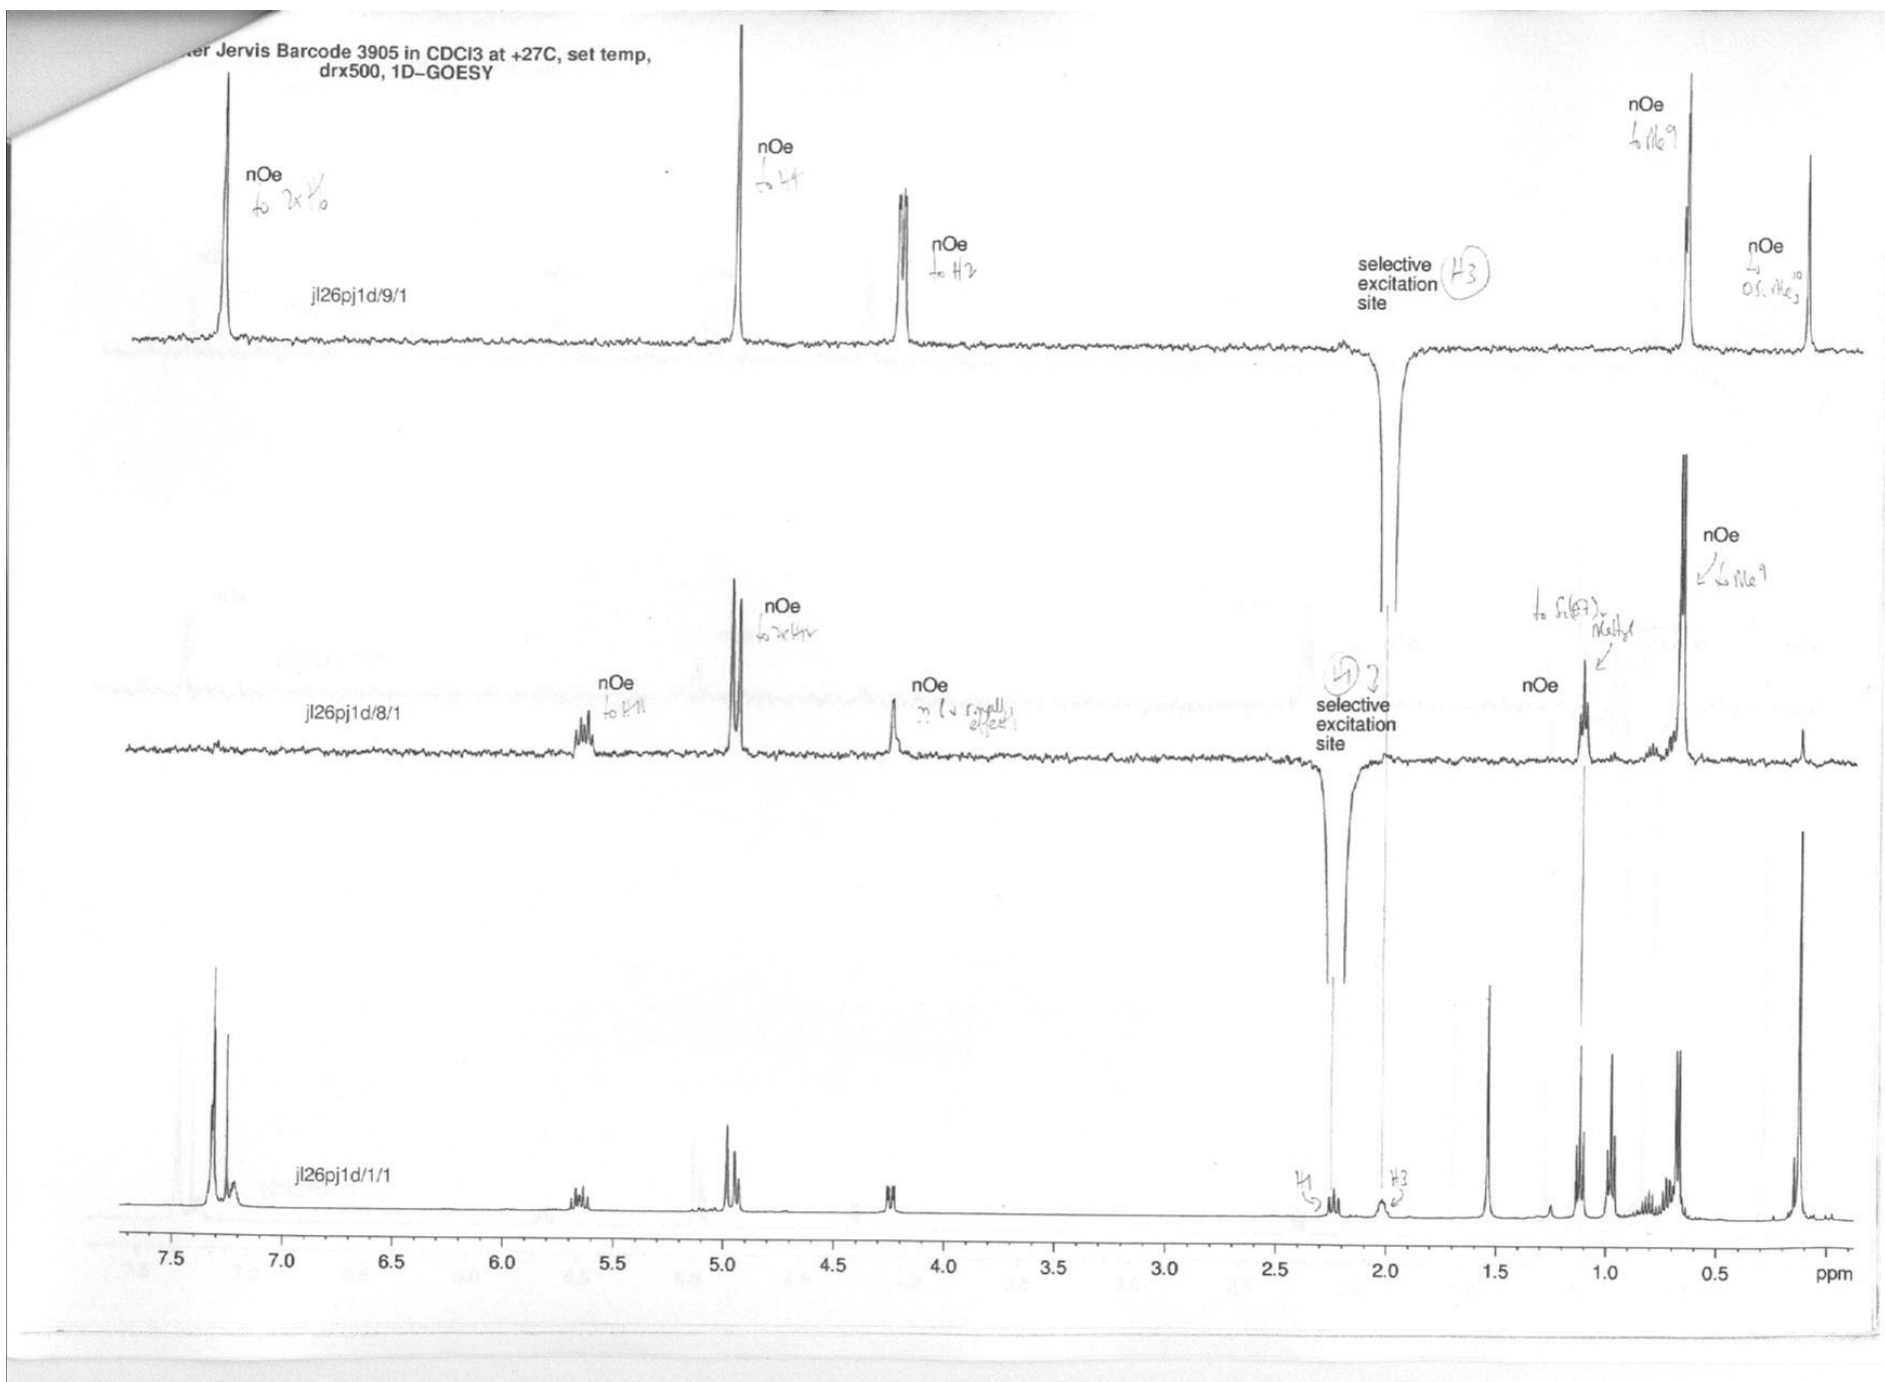

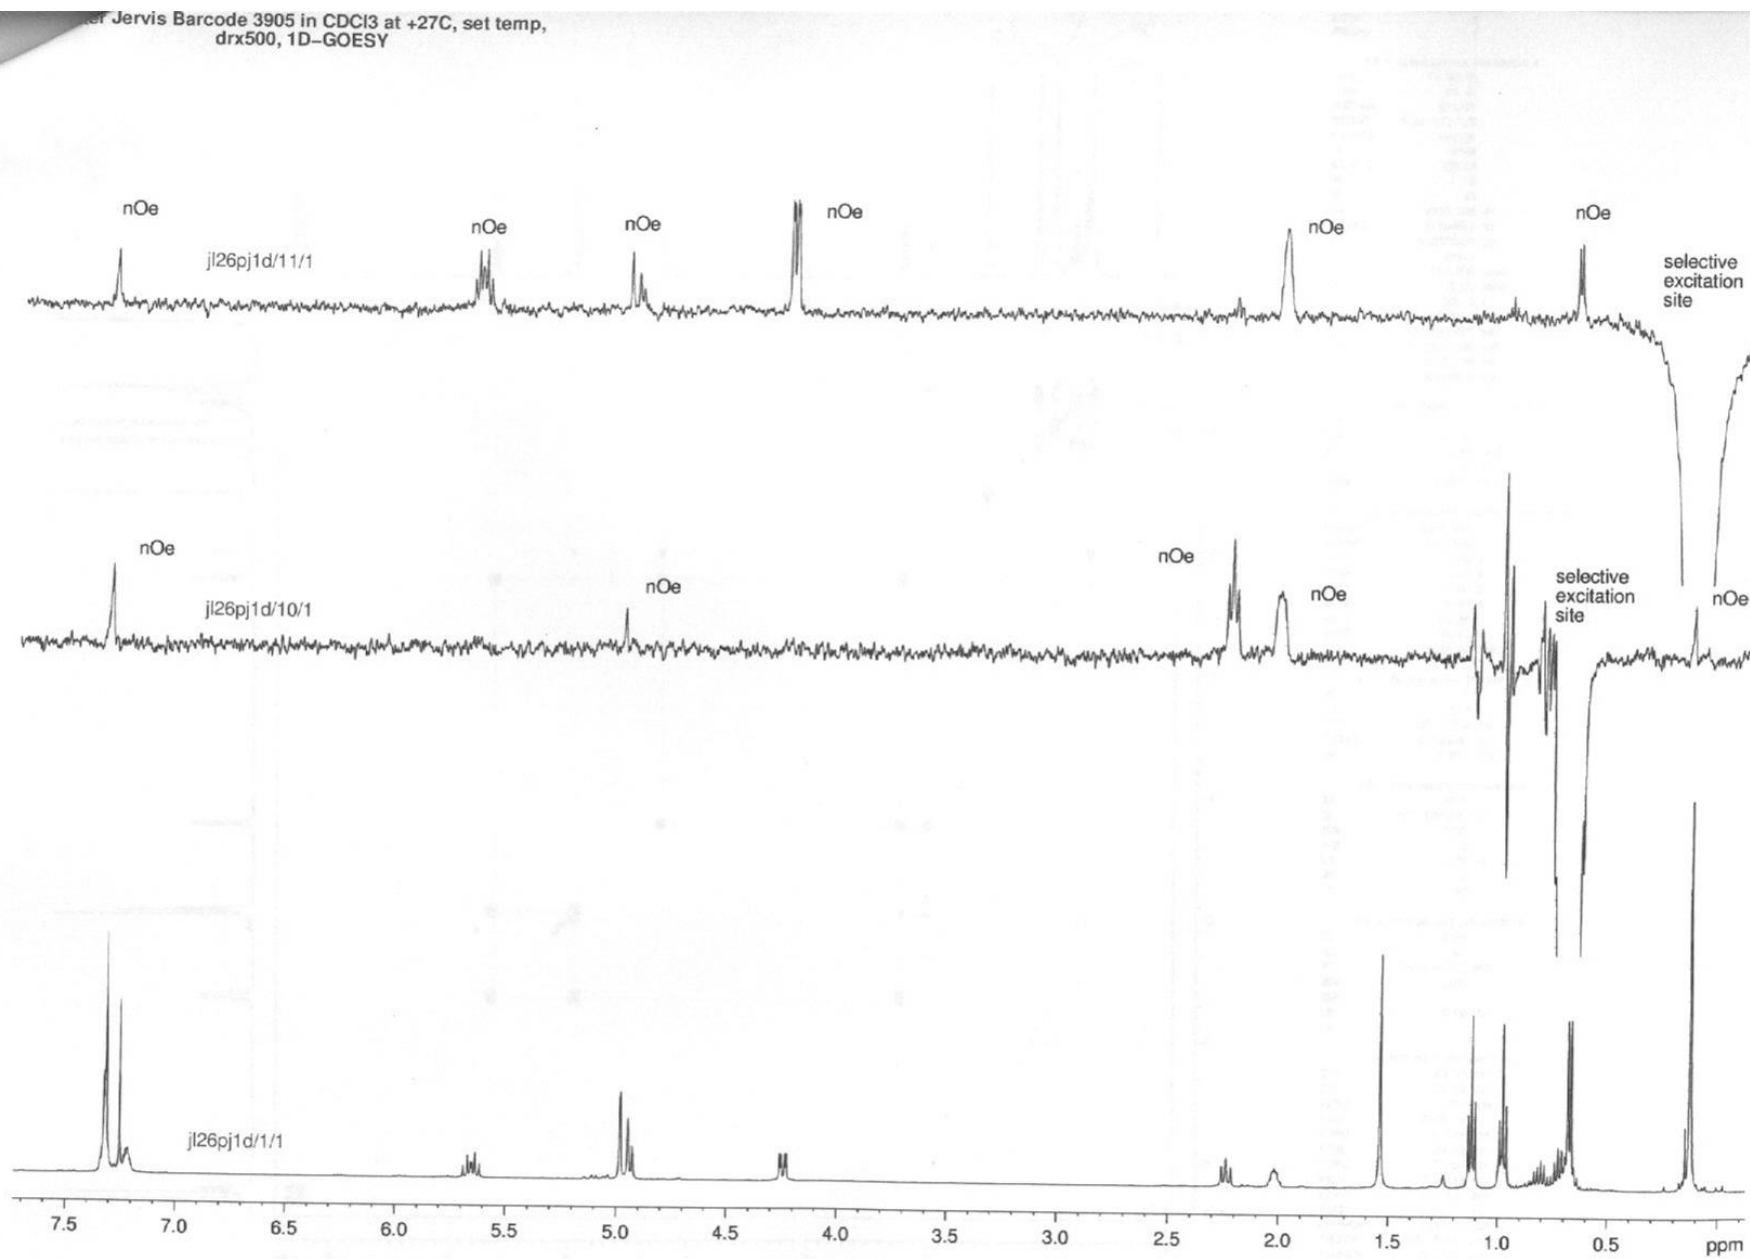

Supplement: Beilstein_J_Org_Chem-03-06-s007.pdf [file Beilstein_J_Org_Chem-03-06-s007.pdf]
