# Supplementary material for: Tether-directed synthesis of highly substituted oxasilacycles via an intramolecular allylation employing allylsilanes
Source: PubMed Central journal article supplement (PMC1810303; doi:10.1186/1860-5397-3-6), 2007-02-08

## Additional File 8

**Tether-directed synthesis of highly substituted oxasilacycles *via* an intramolecular allylation employing allylsilanes**

Peter J. Jervis and Liam R. Cox\*

email: l.r.cox@bham.ac.uk

**$^1\text{H-NMR}$  and  $^{13}\text{C-NMR}$  Spectra for the following compounds:**

**14b, 15b**

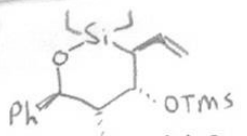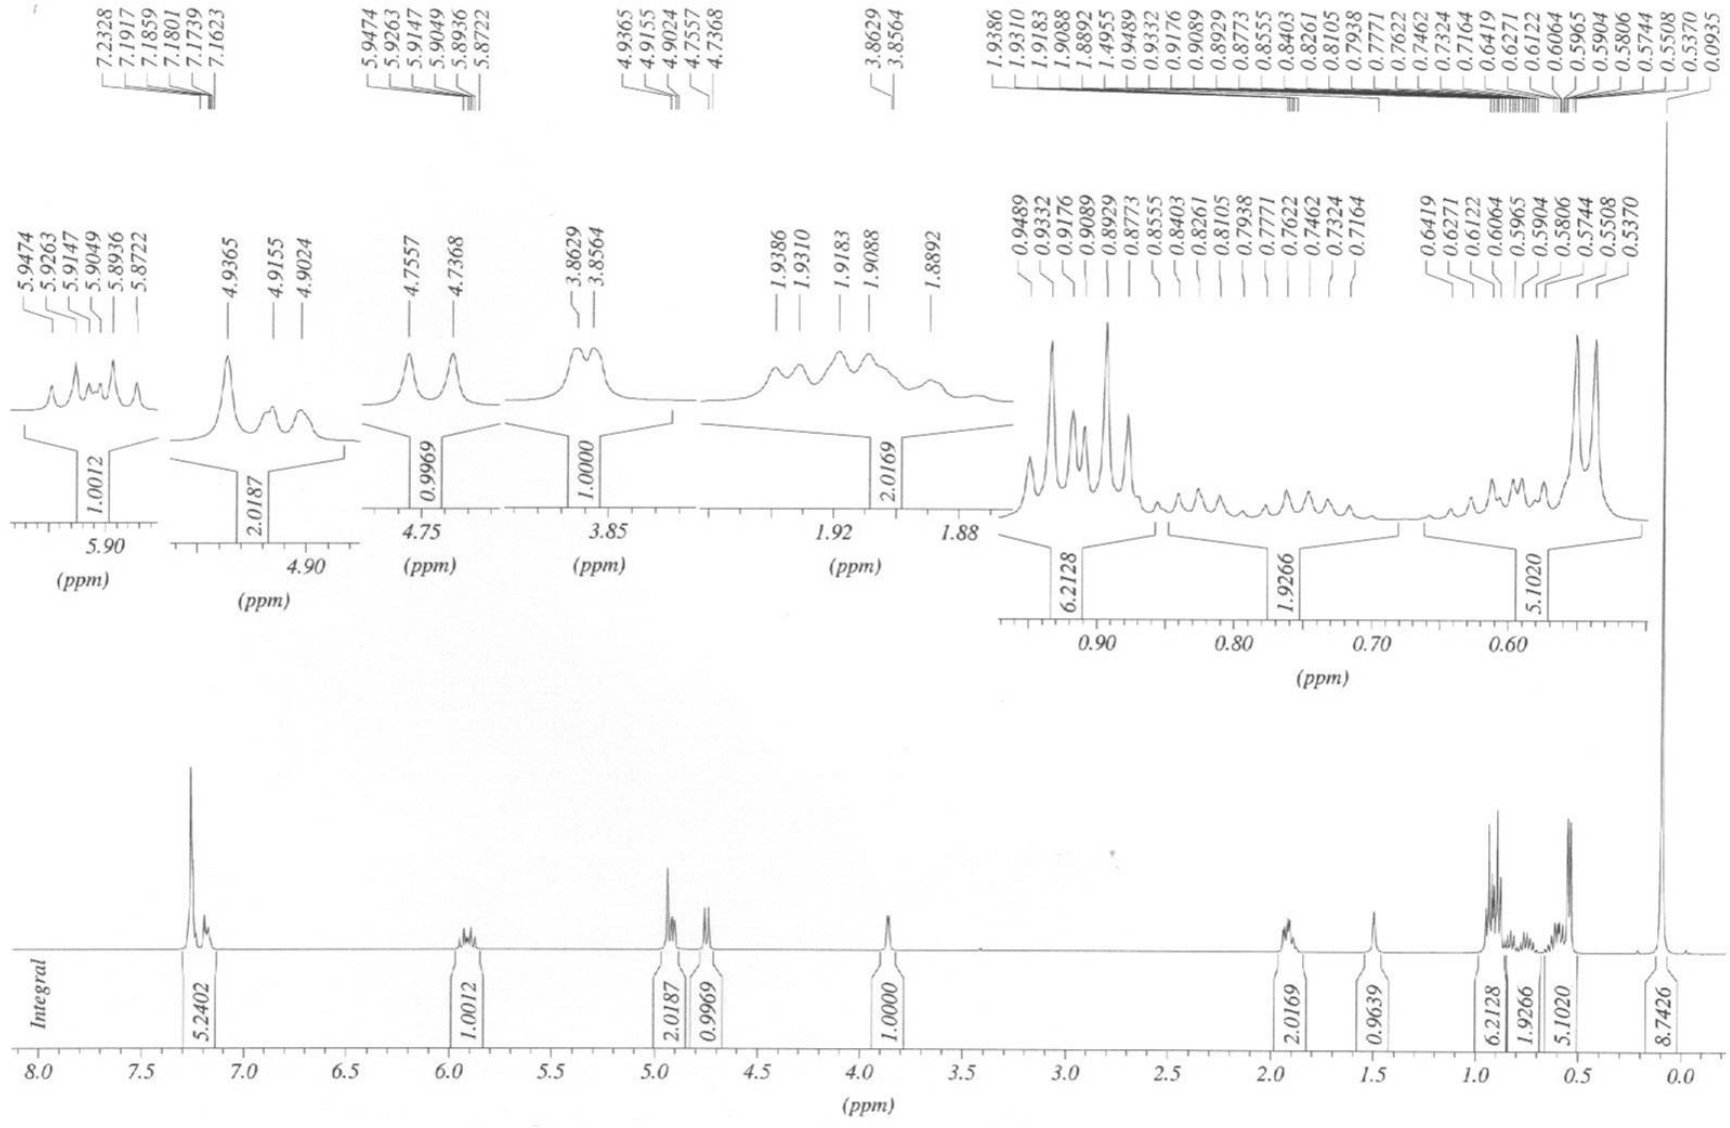



Peter Jarvis Sample 1, Barcode 3902 in CDCl3 at +27C, set temp  
dix500, Gradient COSY90

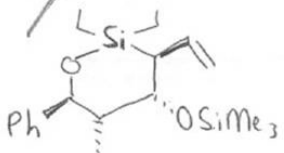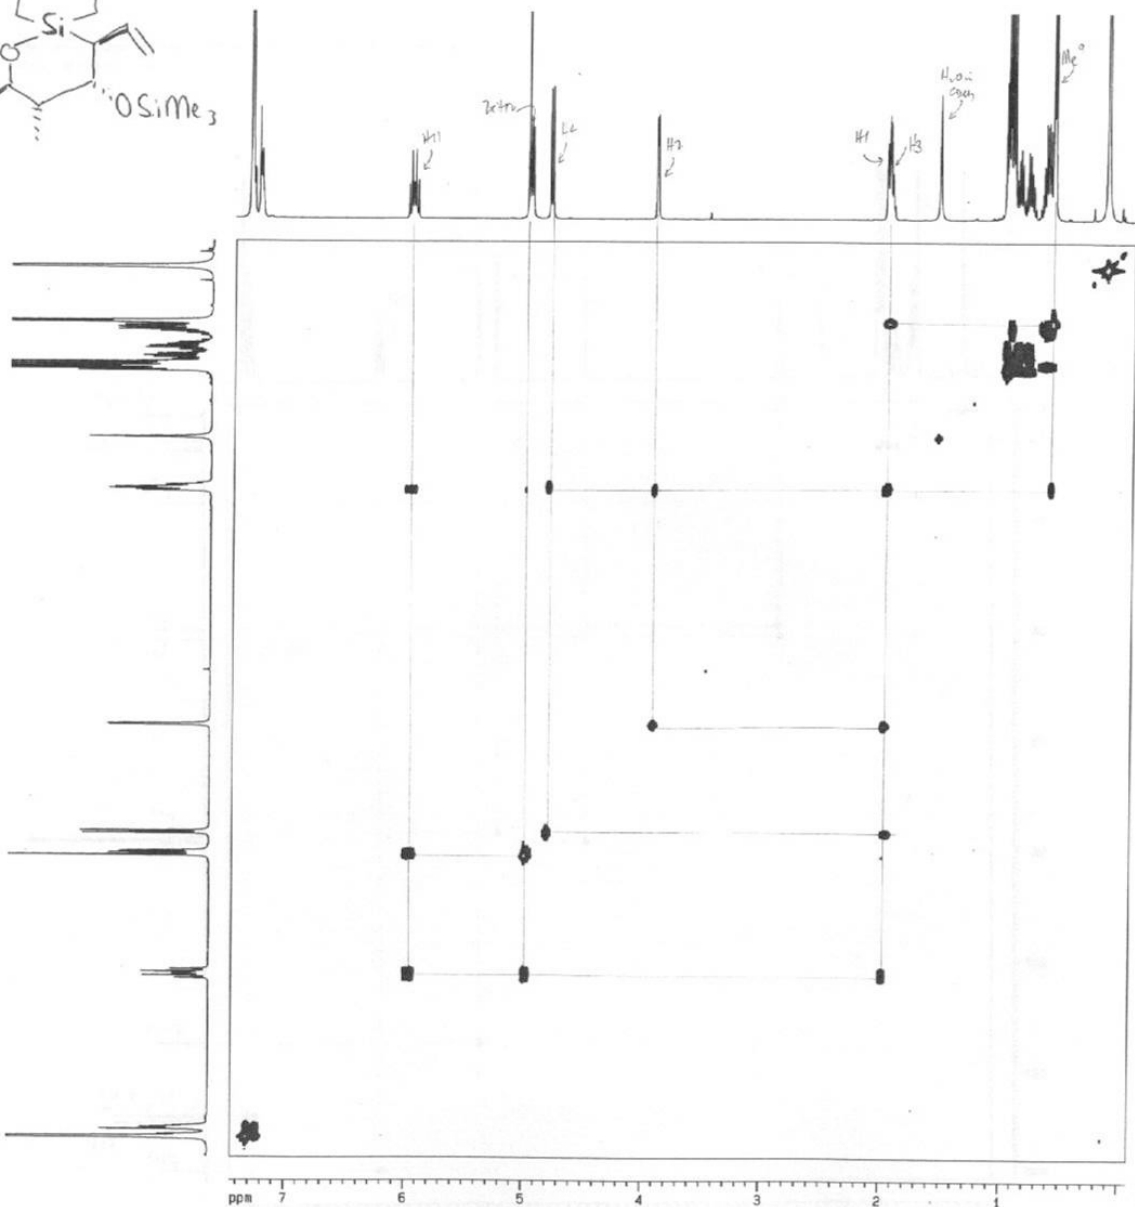

Current Data Parameters

NAME j100p11d  
EXPNO 4  
PROCNO 1

F2 - Acquisition Parameters

Date\_ 20050705  
Time 21:43  
INSTRUM dix500  
PROBHD 5 mm TBI H/C  
PULPROG coesygp  
TD 2048  
SOLVENT CDCl3  
NS 8  
DS 16  
SWH 4310.345 Hz  
FIDRES 2.104661 Hz  
AQ 0.2976180 sec  
RG 71.8  
DM 116.000 usec  
DE 5.50 usec  
TE 300.0 K  
d0 0.00000300 sec  
D1 2.00000000 sec  
d13 0.00000300 sec  
D16 0.00010000 sec  
IN0 0.00023200 sec

----- CHANNEL f1 -----

NUC1 1H  
PD 10.70 usec  
P1 10.70 usec  
PL1 1.00 dB  
SFO1 500.1318667 MHz

----- GRADIENT CHANNEL -----

GRNAM1 SINE.100  
GRNAM2 SINE.100  
GPX1 0.00 %  
GPX2 0.00 %  
GPY1 0.00 %  
GPY2 0.00 %  
GPZ1 10.00 %  
GPZ2 10.00 %  
P16 1000.00 usec

F1 - Acquisition parameters

ND0 1  
TD 512  
SFO1 500.1318 MHz  
FIDRES 8.418642 Hz  
SN 8.618 ppm

F2 - Processing parameters

SI 2048  
SF 500.1300233 MHz  
WDW SINE  
SSB 0  
LB 0.00 Hz  
BB 0  
PC 1.00

F1 - Processing parameters

SI 1024  
MC2 GF  
SF 500.1300233 MHz  
WDW SINE  
SSB 0  
LB 0.00 Hz  
BB 0

2D NMR plot parameters

CX2 20.00 cm  
CX1 20.00 cm  
F2PLO 7.450 ppm  
F2LO 3726.06 Hz  
F2PHI -0.982 ppm  
F2HI -41.26 Hz  
F1PLO 7.480 ppm  
F1LO 3740.62 Hz  
F1PHI -0.061 ppm  
F1HI -30.73 Hz  
F2PPMCM 0.37664 ppm/cm  
F2HZCM 188.36713 Hz/cm  
F1PPMCM 0.37706 ppm/cm  
F1HZCM 188.57759 Hz/cm

Peter Jarvis Sample 1, Barcode 3902 in CDCl3 at 427C, set temp drx500, Gradient HSGC

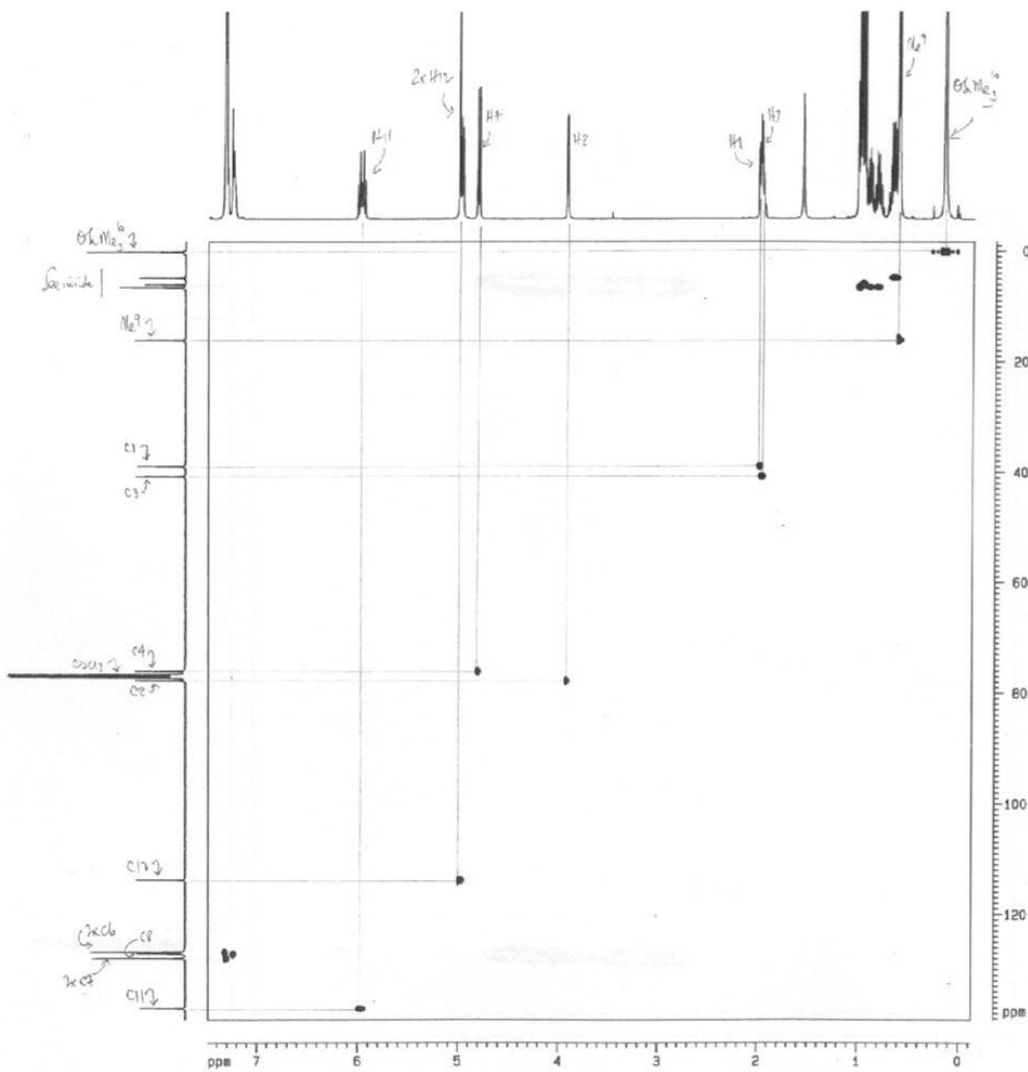

Current Data Parameters

NAME 1105015d  
 EXPNO 2  
 PROCNO 1

F2 - Acquisition Parameters

Date\_ 20090705  
 Time 18:38  
 INSTRUM dr-500  
 PROBHD 5 mm TBI H/C  
 PULPROG invgtp  
 TD 2048  
 SOLVENT CDCl3  
 NS 8  
 DS 8  
 SWH 4310.345 Hz  
 FIDRES 2.104951 Hz  
 AQ 0.2378160 sec  
 RG 32788  
 DN 116.000 usec  
 DE 0.50 usec  
 TE 300.0 K  
 CMT2 145.8000000  
 d0 0.0000000 sec  
 d1 2.0000000 sec  
 d4 0.0072454 sec  
 d11 0.0000000 sec  
 d13 0.0000000 sec  
 d18 0.0010000 sec  
 d20 0.0010000 sec  
 d21 0.0008714 sec  
 d30 0.0000140 sec

CHANNEL F1

NUC1 1H  
 P1 17.70 usec  
 P2 21.40 usec  
 PL1 1.00 dB  
 SFO1 500.1318887 MHz

CHANNEL F2

CPDPRG2 gprp  
 NUC2 13C  
 P4 12.00 usec  
 P4 24.00 usec  
 PCPD2 75.00 usec  
 PL2 -1.00 dB  
 PL12 15.00 dB  
 SFO2 125.7678893 MHz

GRADIENT CHANNEL

SPHANG SINE 100  
 SPHANG SINE 100  
 SPHANG SINE 100  
 GPC1 0.00 %  
 GPC2 0.00 %  
 GPC3 0.00 %  
 GPC4 0.00 %  
 GPC5 0.00 %  
 GPC6 0.00 %  
 GPC7 0.00 %  
 GPC8 0.00 %  
 GPC9 0.00 %  
 GPC10 0.00 %  
 GPC11 0.00 %  
 GPC12 0.00 %  
 GPC13 0.00 %  
 GPC14 0.00 %  
 GPC15 0.00 %  
 GPC16 0.00 %  
 GPC17 0.00 %  
 GPC18 0.00 %  
 GPC19 0.00 %  
 GPC20 0.00 %  
 GPC21 80.00 %  
 GPC22 30.00 %  
 GPC23 20.10 %  
 P15 1000.00 usec

F1 - Acquisition parameters

MD 4  
 TD 512  
 SFO1 125.7678893 MHz  
 FIDRES 42.831698 Hz  
 SW 174.359 pps

F2 - Processing parameters

SI 2048  
 SF 500.1302333 MHz  
 MCW GSINE  
 SSB 2  
 LB 0.00 Hz  
 GB 0  
 PC 1.00

F1 - Processing parameters

SI 1524  
 MC2 TRF1  
 SF 125.767845 MHz  
 MCW GSINE  
 SSB 0  
 LB 0.00 Hz  
 GB 0

2D NMR plot parameters

CH2 17.00 cm  
 CX1 17.00 cm  
 F2PL0 7.486 ppm  
 F2L0 3745.03 Hz  
 F2PHI -8.129 ppm  
 F2R1 -64.41 Hz  
 F1PL0 136.302 ppm  
 F1L0 17519.34 Hz  
 F1PHI -1.701 ppm  
 F1R1 -213.98 Hz  
 F2PRMCM 0.44892 ppm/cm  
 F2R2CM 204.09448 Hz/cm  
 F1PRMCM 8.20434 ppm/cm  
 F1R2CM 1049.07784 Hz/cm

Peter Jervis Sample 1, Barcode 3902 in C0C13 at 427C, set temp  
grx500, Gradient HMBC

```

Current Data Parameters
NAME      j105w118
EXPNO    3
PROCNO    1

F2 - Acquisition Parameters
Date_     20050705
Time      19.01
INSTRUM   grx500
PROBHD    5 mm TBI H/C
PULPROG   invApp1rnm
TD         2048
SOLVENT   C0C13
NS         8
DS         16
SFO1      430.345 Hz
FIDRES    2.104661 Hz
AQ         0.2378180 sec
RG         32768
DF         115.000 usec
DE         5.50 usec
TE         300.0 K
CHST2     160.0000000
S0         0.0000000 sec
D0         2.0000000 sec
S1         0.00312500 sec
D5         0.1000000 sec
C13        0.0000000 sec
D16        0.0001000 sec
IN0        0.00002280 sec

----- CHANNEL f1 -----
NUC1       1H
P1         10.70 usec
p2         21.40 usec
PL1        1.00 dB
SFO1       500.1318667 MHz

----- CHANNEL f2 -----
NUC2       13C
P3         12.00 usec
PL2        -1.00 dB
SFO2       125.7667898 MHz

----- GRADIENT CHANNEL -----
GPMAX1     SINE.100
GPMAX2     SINE.100
GPMAX3     SINE.100
SPK1       0.00 %
SPK2       0.00 %
SPK3       0.00 %
SPY1       0.00 %
SPY2       0.00 %
SPY3       0.00 %
SPZ1       50.00 %
SPZ2       30.00 %
SPZ3       40.10 %
P16        1000.00 usec

F1 - Acquisition parameters
MD0        2
TD          512
SFO1       125.7668 MHz
FIDRES     42.831588 Hz
SW         174.369 ppm

F2 - Processing parameters
SI          2048
SF          500.130233 MHz
WDW         QSINE
SSB         2
LB          0.00 Hz
GB          0
PC          0.20

F1 - Processing parameters
SI          1024
MC2         SF
SF          125.7577945 MHz
WDW         QSINE
SSB         2
LB          0.00 Hz
GB          0

2D NMR plot parameters
CX2         17.00 ce
CX1         17.00 ce
F2PLD       6.128 ppm
F2LD        3085.22 Hz
F2PH1       6.763 ppm
F2MC        2882.12 Hz
F2PLD       81.062 ppm
F2LD        10194.12 Hz
F2PH1       36.104 ppm
F2HD        4540.34 Hz
F2PPMH1     0.92154 ppm/cm
F2GREN      10.77051 Hz/cm
F2PPMH2     2.64487 ppm/cm
F2HD2CH     332.57547 Hz/cm

```

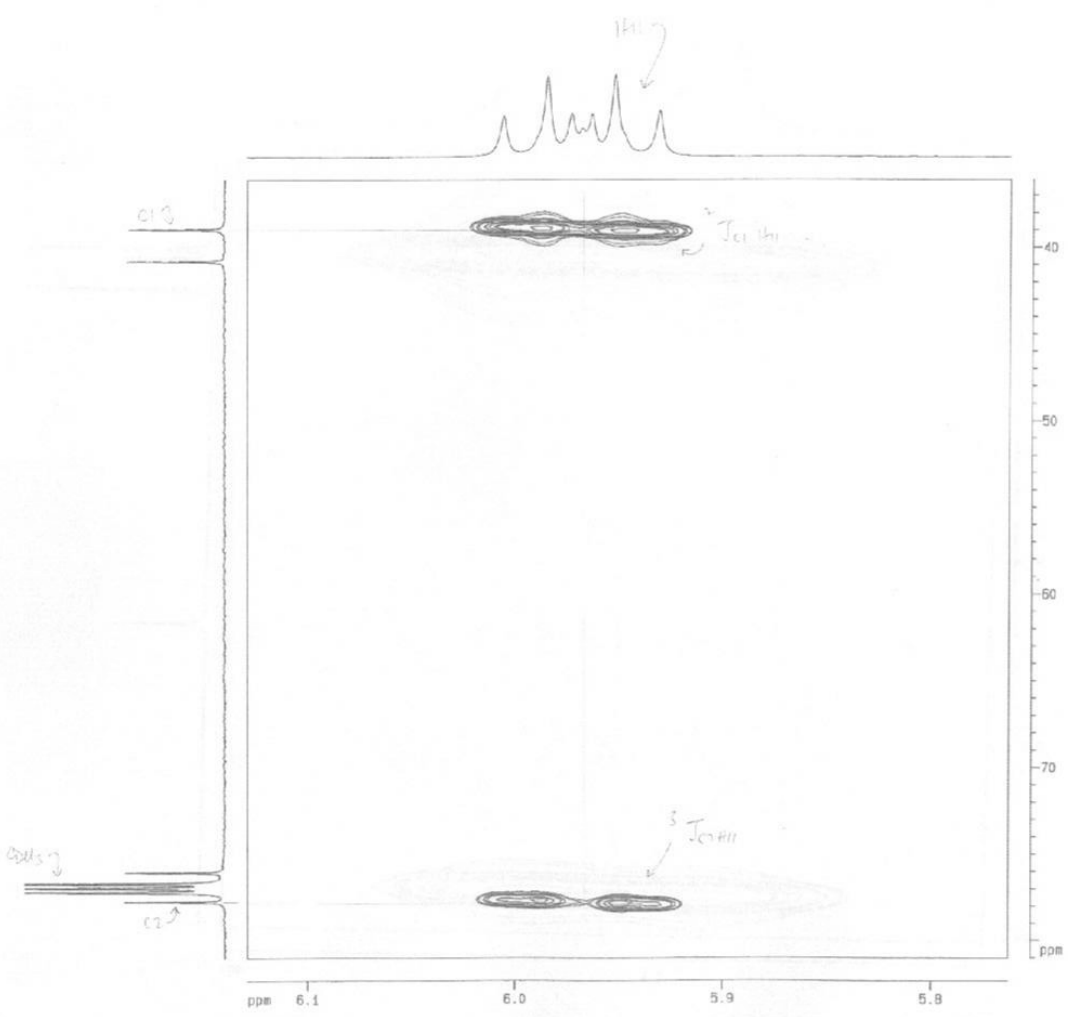

Peter Jarvis Sample 1, Barcode 3902 in CDCl3 at +27C, set temp  
Inx500, Gradient HMBC

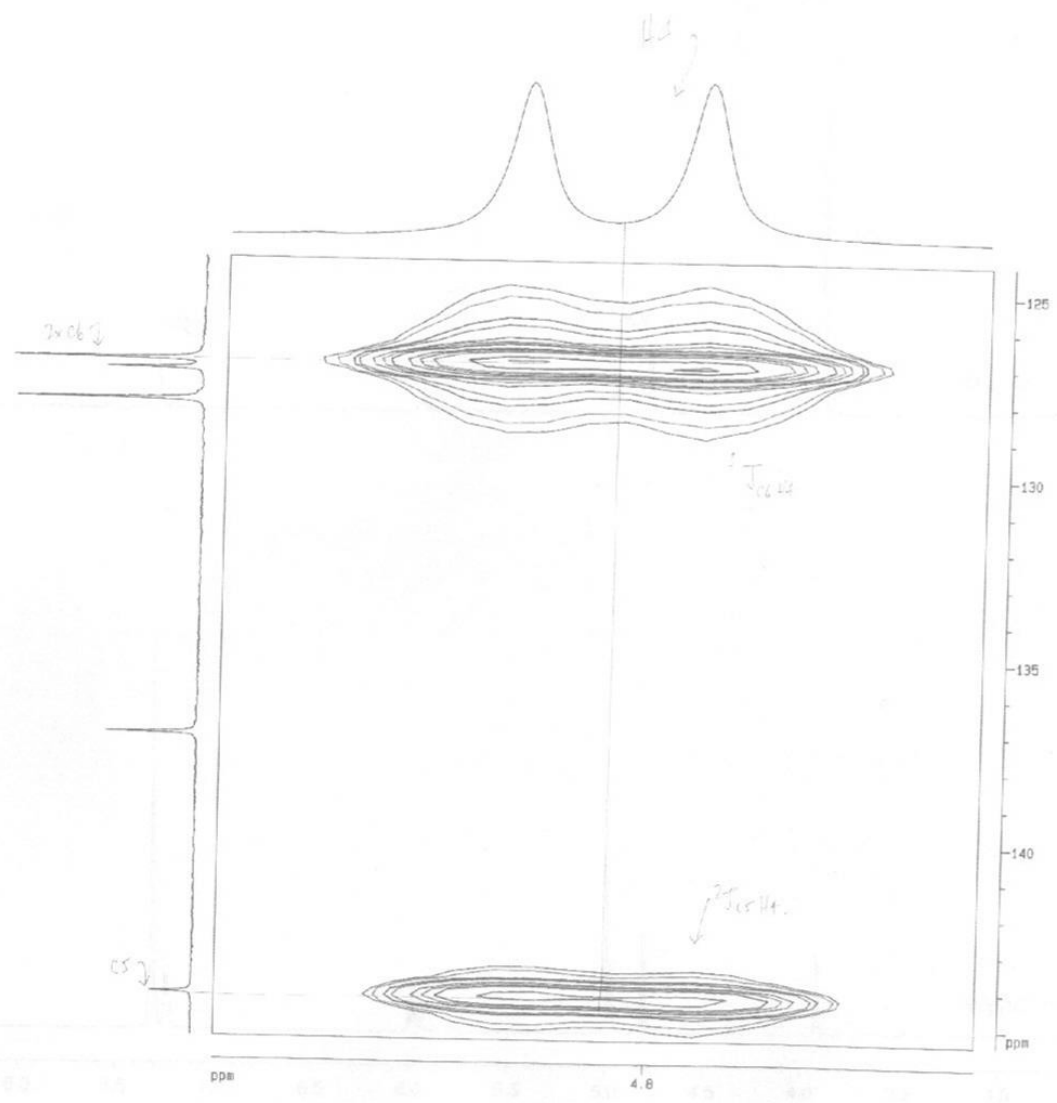

```

Current Data Parameters
NAME      J106P110
EXPNO    3
PROCNO   1

F2 - Acquisition Parameters
Date_    20050705
Time     19.01
INSTRUM  spect
PROBHD   5 mm 1H1
PULPROG  invAgg3p1zr
TD        2048
SOLVENT  CDCl3
NS        8
DS        16
SWH       4312.345 Hz
FIDRES    2.104851 Hz
AQ        0.2378100 sec
RG        32768
DM        116.000 usec
DE        5.00 usec
TE        300.0 K
CHET2    100.000000
G0        0.00000000 sec
G1        2.00000000 sec
G2        0.00312500 sec
G3        0.10000000 sec
G13       2.00000000 sec
G16       0.00010000 sec
IN0       0.0000280 sec

----- CHANNEL f1 -----
NUC1      1H
P1        19.70 usec
P2        21.40 usec
PL1       1.00 dB
SFO1      500.1318867 MHz

----- CHANNEL f2 -----
NUC2      13C
P3        12.00 usec
P4        -1.00 dB
SFO2      125.7667583 MHz

----- GRADIENT CHANNEL -----
GPMAX1    SINE.100
GPMAX2    SINE.100
GPMAX3    SINE.100
GPX1      0.00 %
GPX2      0.00 %
GPX3      0.00 %
GPY1      0.00 %
GPY2      0.00 %
GPY3      0.00 %
GPZ1      50.00 %
GPZ2      30.00 %
GPZ3      40.10 %
P16       1000.00 usec

F1 - Acquisition parameters
ND0        2
TD         812
SFO1      125.7668 MHz
FIDRES     42.831688 Hz
SW         174.365 ppm

F2 - Processing parameters
SI         2048
SF         500.1300233 MHz
WDW        GB16
SSB        2
LB         0.00 Hz
GB         0
PC         0.20

F1 - Processing parameters
SI         1024
HC2        6F
SF         125.7577945 MHz
WDW        GB16
SSB        2
LB         0.00 Hz
GB         0

2D 1H/13C plot parameters
CXP        17.00 cm
CX1        17.00 cm
F2PL0      4.940 ppm
F2L0       2423.30 Hz
F2PHI      4.765 ppm
F2H1       2383.31 Hz
F1PL0      145.433 ppm
F1L0       18269.31 Hz
F1PHI      124.145 ppm
F1H0       15612.33 Hz
F2PHICH    0.00470 ppm/cm
F2H1CH    2.35227 Hz/cm
F1PHICH    1.25216 ppm/cm
F1H1CH    157.48845 Hz/cm

```

Peter Jervis Sample 1, Barcode 3902 in CDCl3 at +27C, set temp, drx500, 1D-GOESY

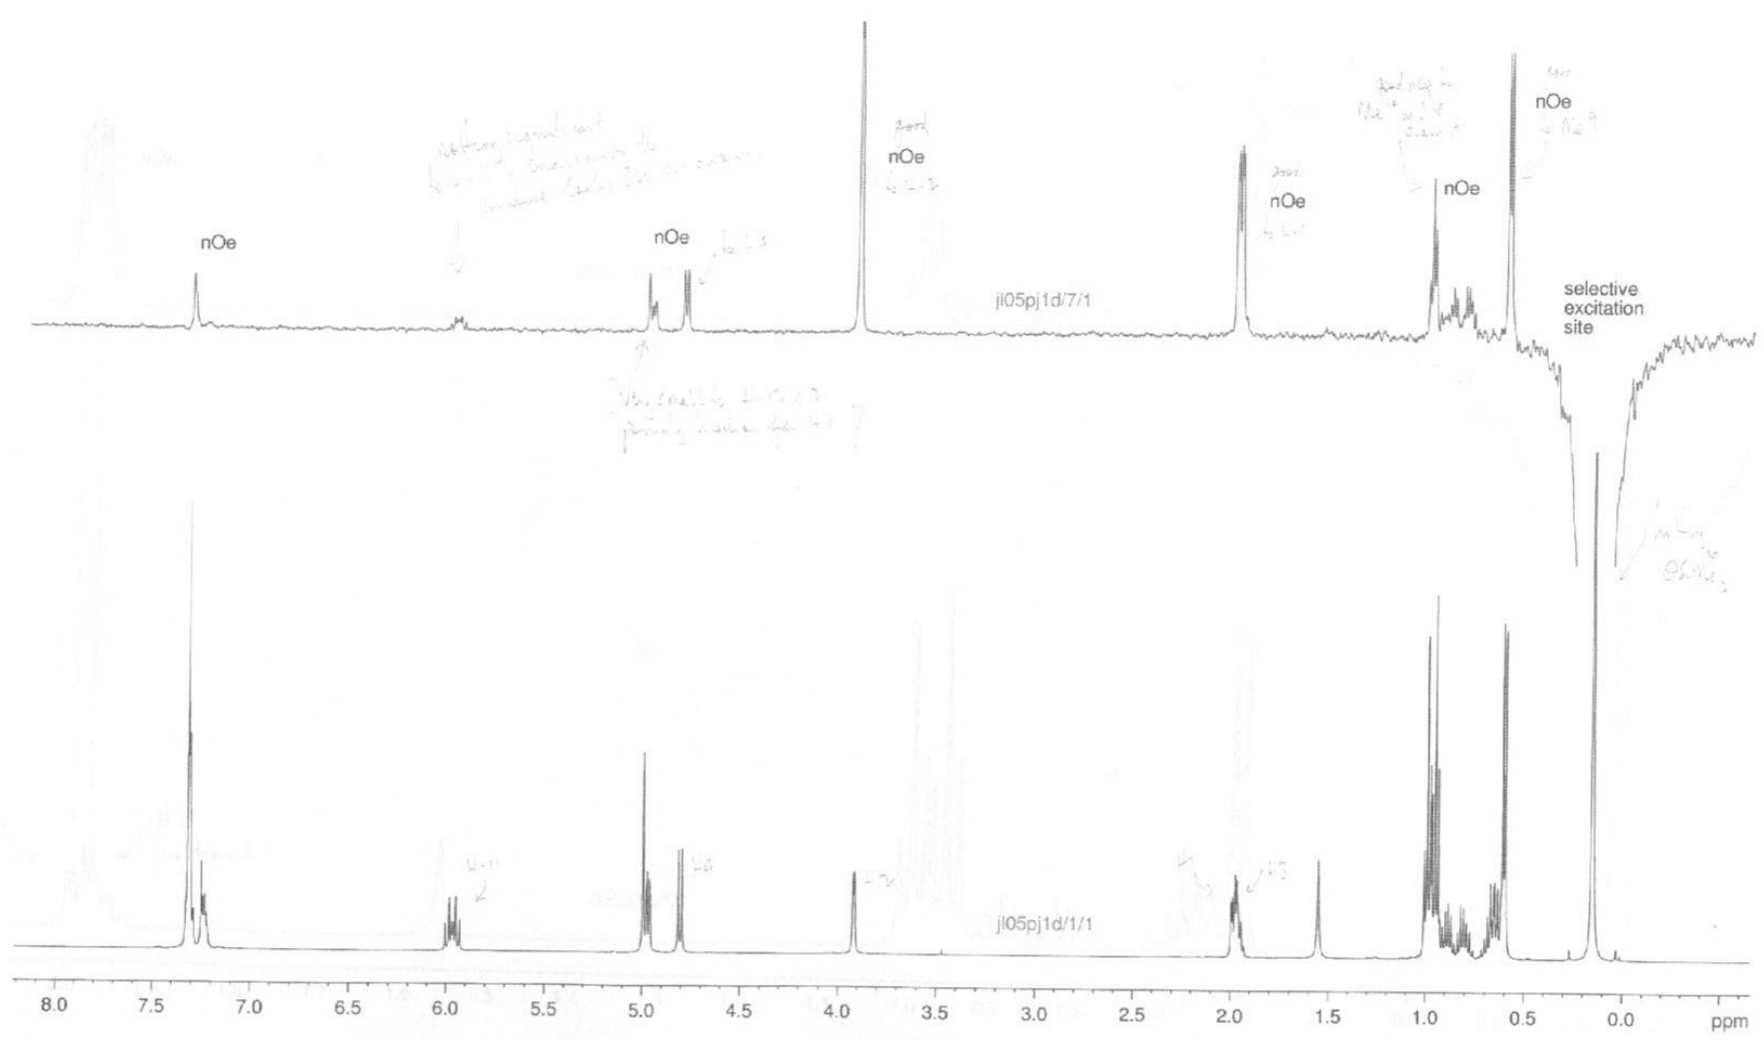



Peter Jervis Sample 1, Barcode 3902 in CDCl3 at +27C, set temp,  
drx500, 1D-GOESY

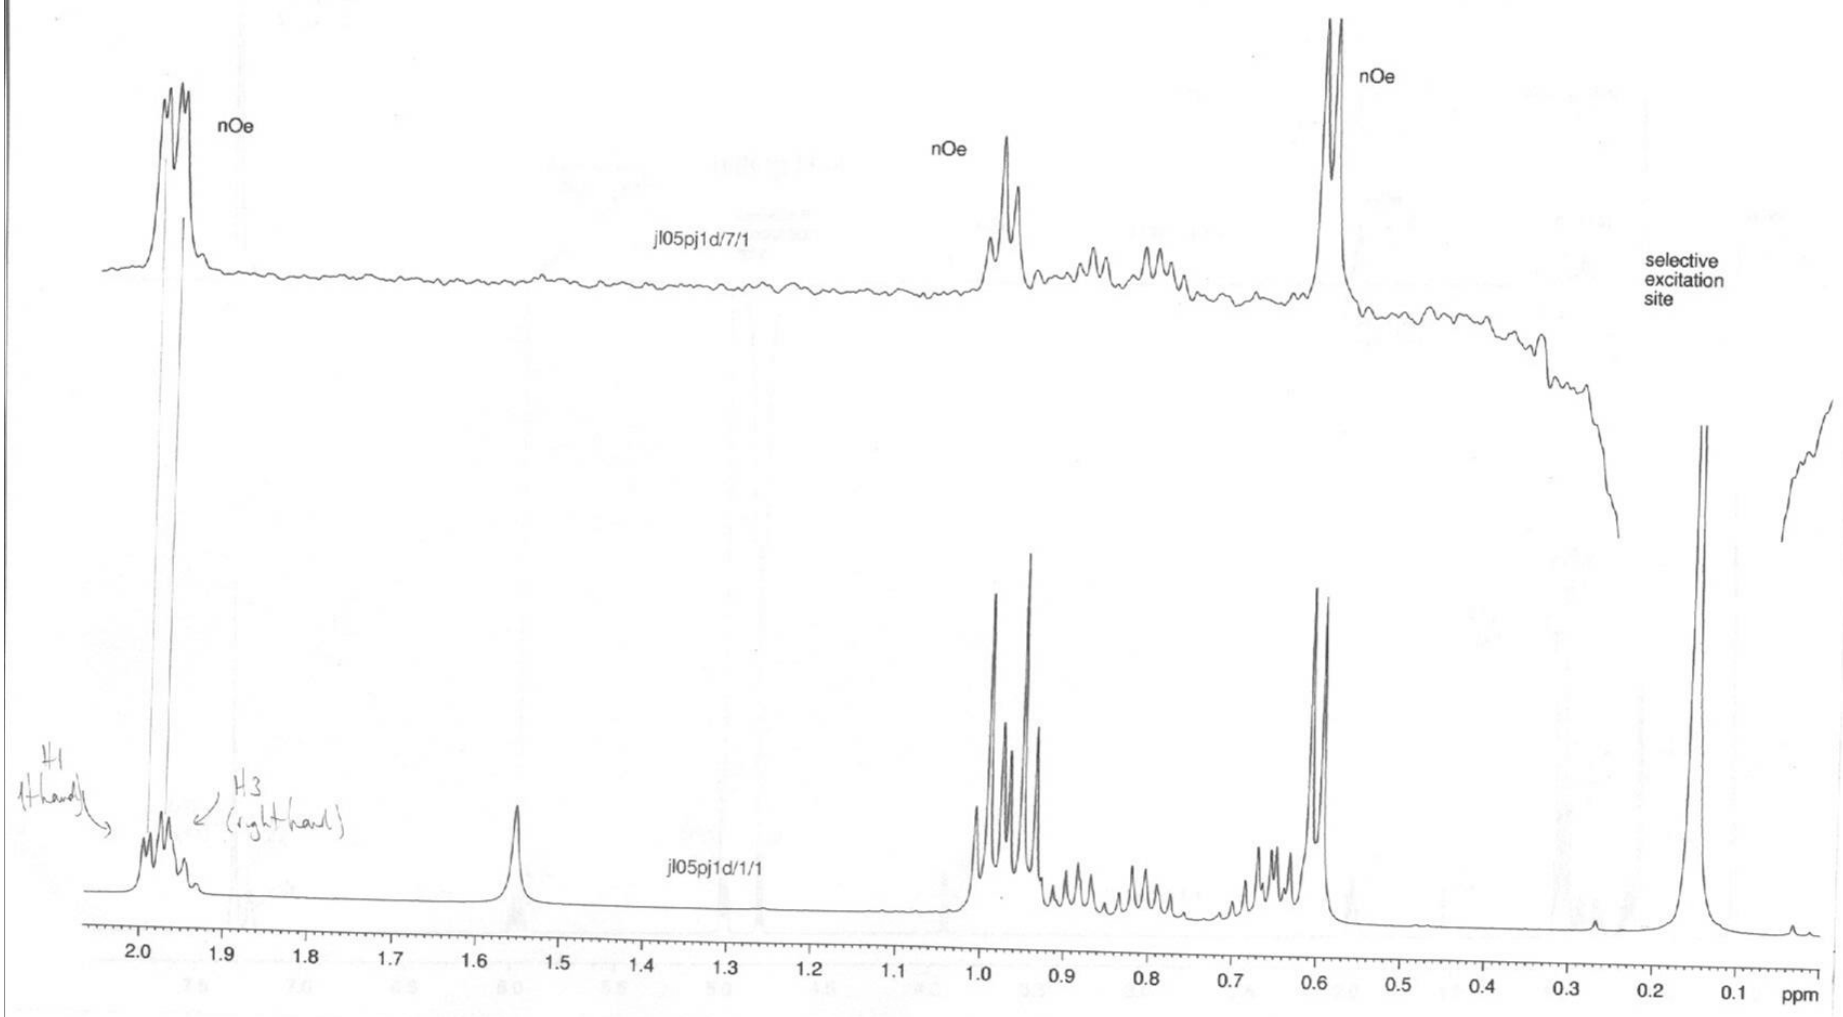

Peter Jervis Sample 1, Barcode 3902 in CDCl<sub>3</sub> at +27C, set temp, drx500, 1D-GOESY

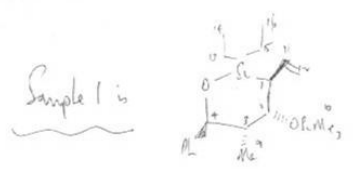

Note how on hitting H4 here, we get the same NOE enhancements as we do when hitting H4 for sample 2

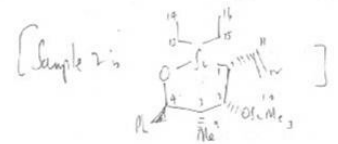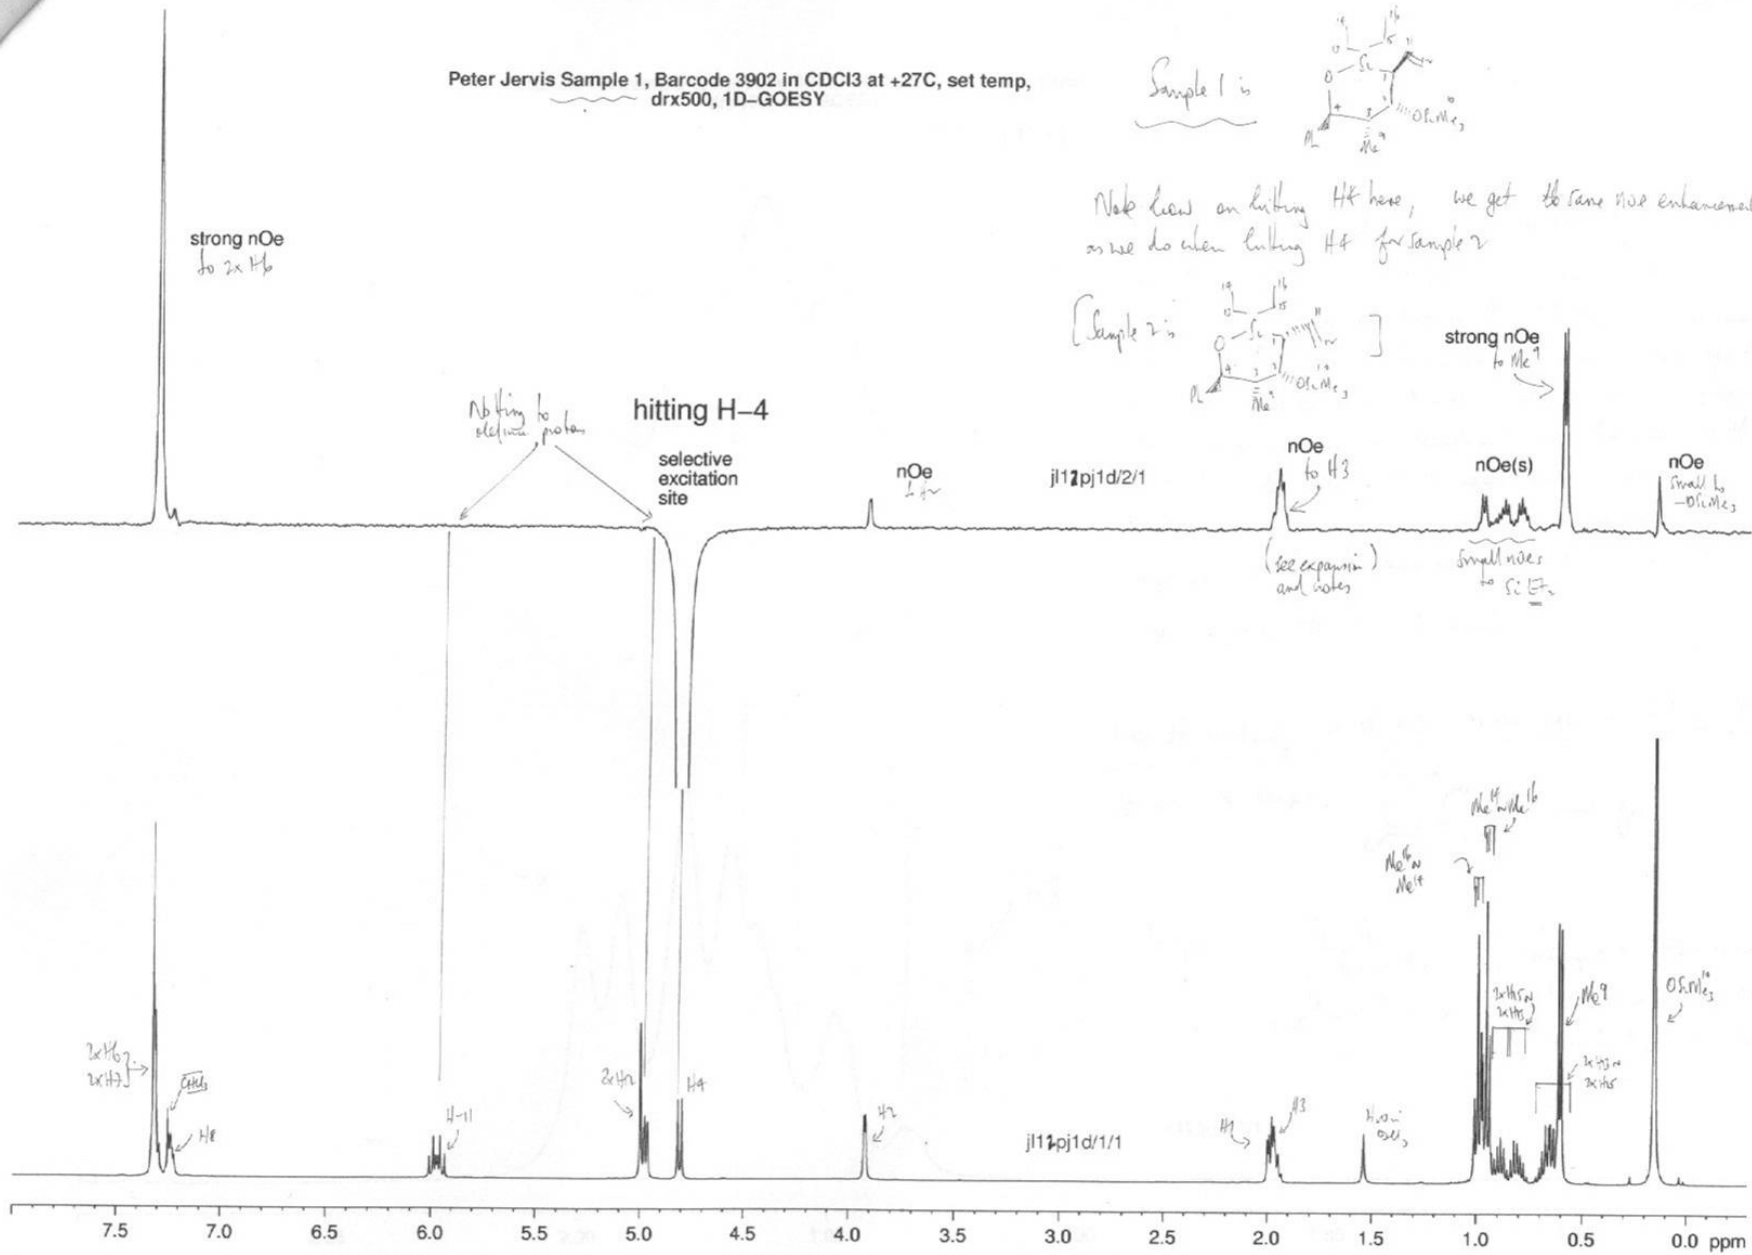

Peter Jervis Sample 1, Barcode 3902 in CDCl3 at +27C, set temp, drx500, 1D-GOESY

hitting H-4

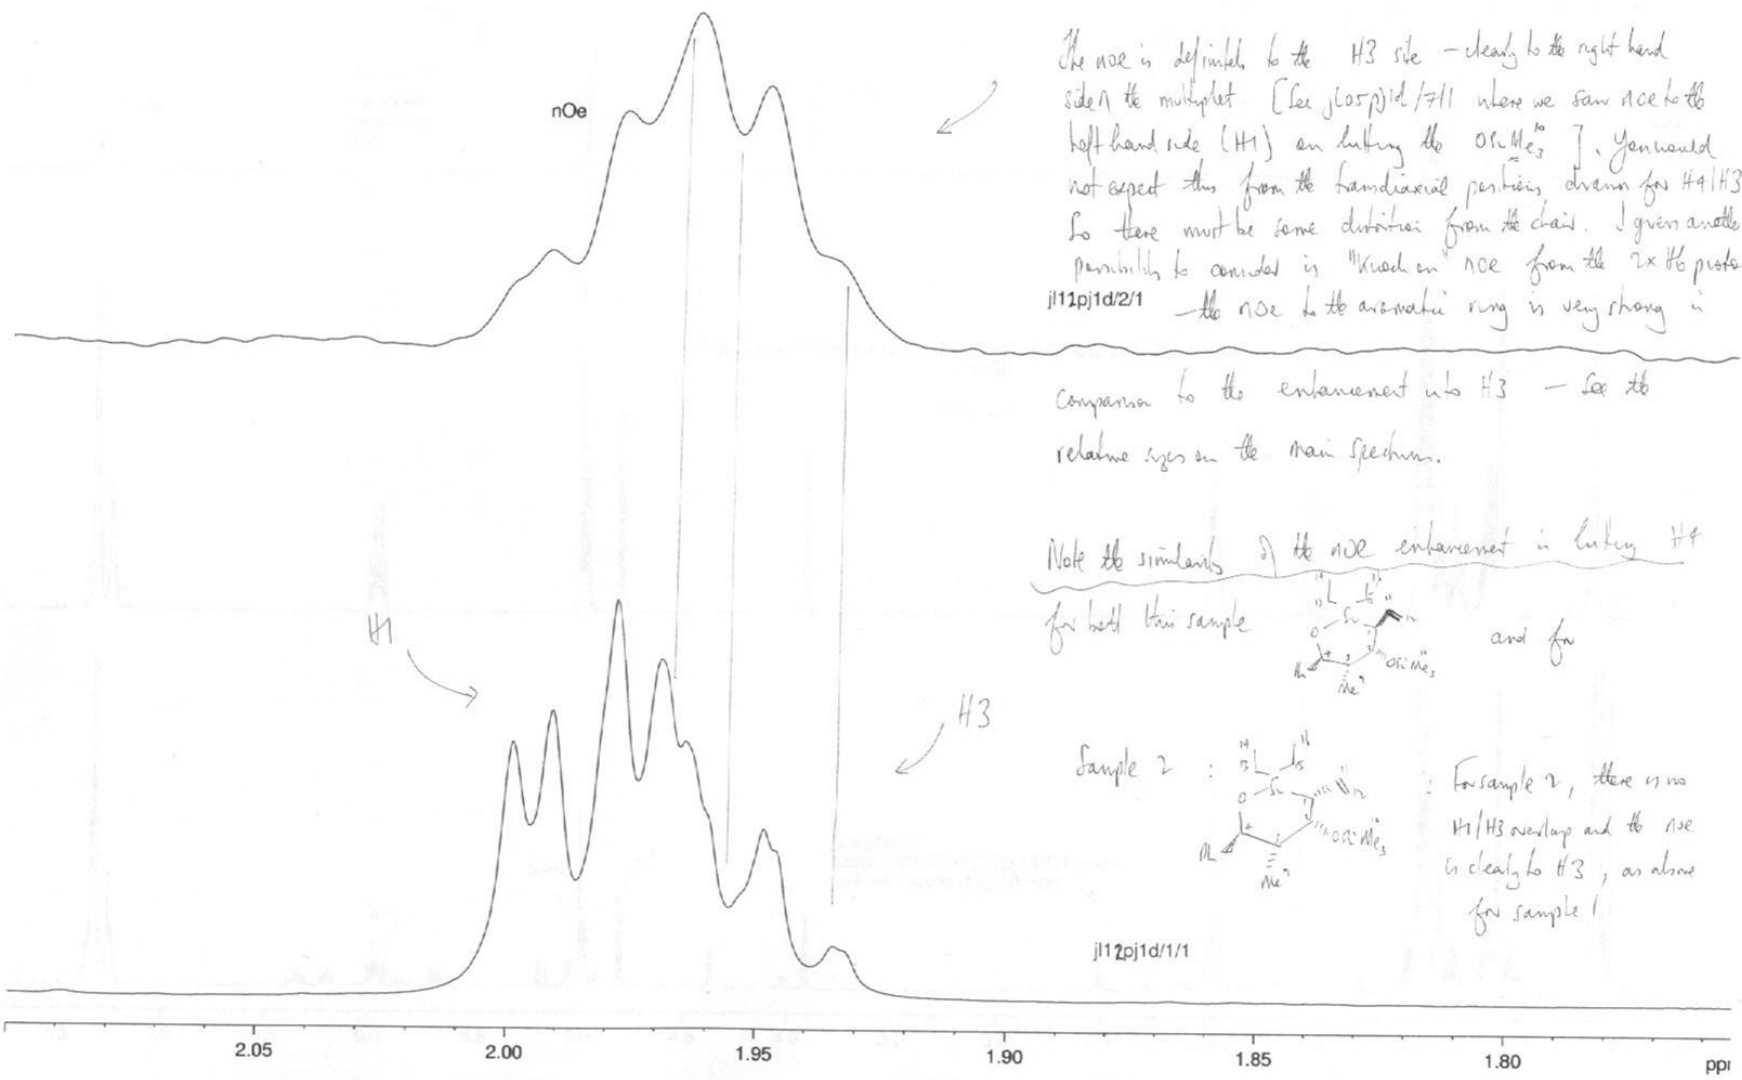

The noe is definitely to the H3 site - clearly to the right hand side of the multiplet. [See j105pj1d/7/11 where we saw noe to the left hand side (H1) on hitting the OMe<sub>3</sub>.] You would not expect this from the band axial positions drawn for H1/H3. So there must be some distortion from the chair. I given another possibility to consider is "crossed" noe from the 2x H6 protons - the noe to the aromatic ring is very strong in

comparison to the enhancement into H3 - see the relative sizes on the main spectrum.

Note the similarity of the noe enhancement in hitting H4

for both this sample

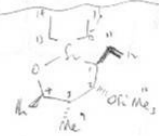

and for

Sample 2 :

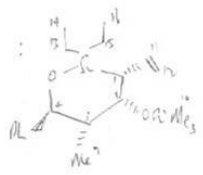

For sample 2, there is no H1/H3 overlap and the noe is clearly to H3, as above for sample 1.

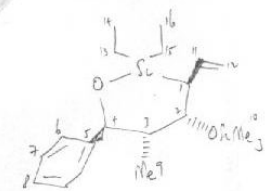

Peter Jervis Sample 1 in CDCl3 at +27C, set temp, drx500, 1D-GOESY

jl29pj1d/2/1  
same sample as jl12pj1d/1/1 below  
now with some degradation

This looks fine for the compd "as drawn"!  
You would expect a good nOe to H3 and  
nothing to the H4 - effectives, H4 and H11  
are "trans diaxial". We also see nothing of  
significance to the OMe<sub>2</sub>.

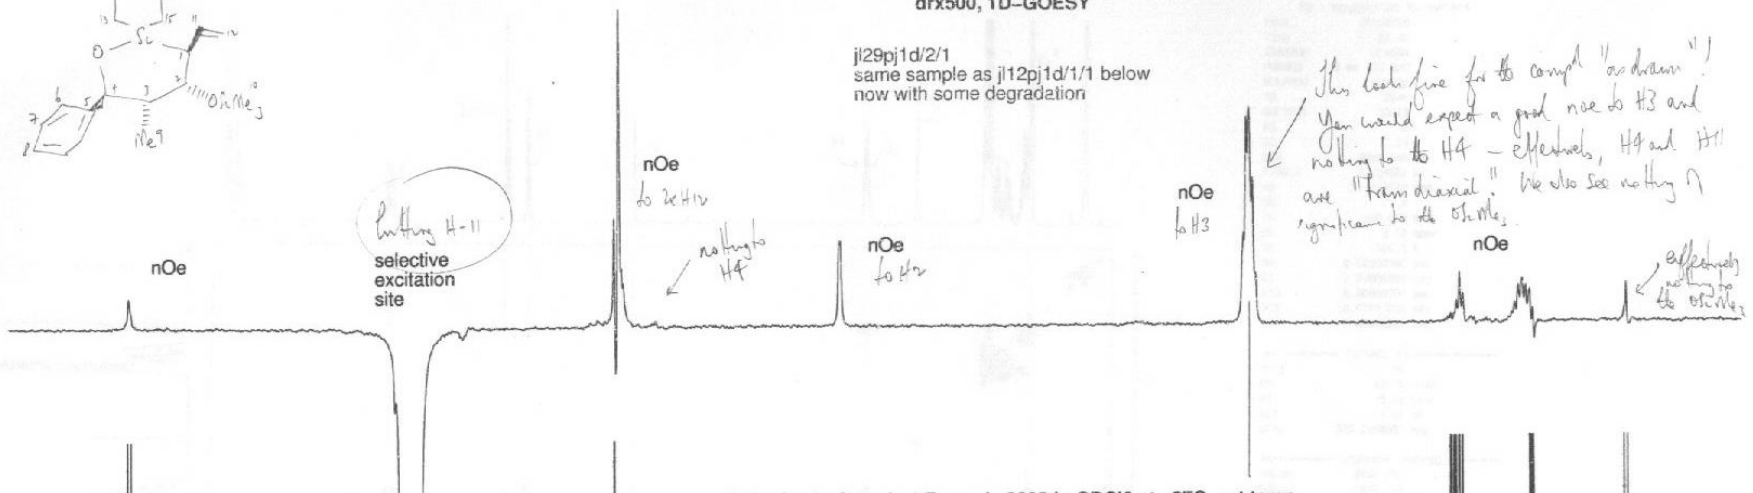

Peter Jervis Sample 1, Barcode 3902 in CDCl3 at +27C, set temp, drx500

jl12pj1d/1/1

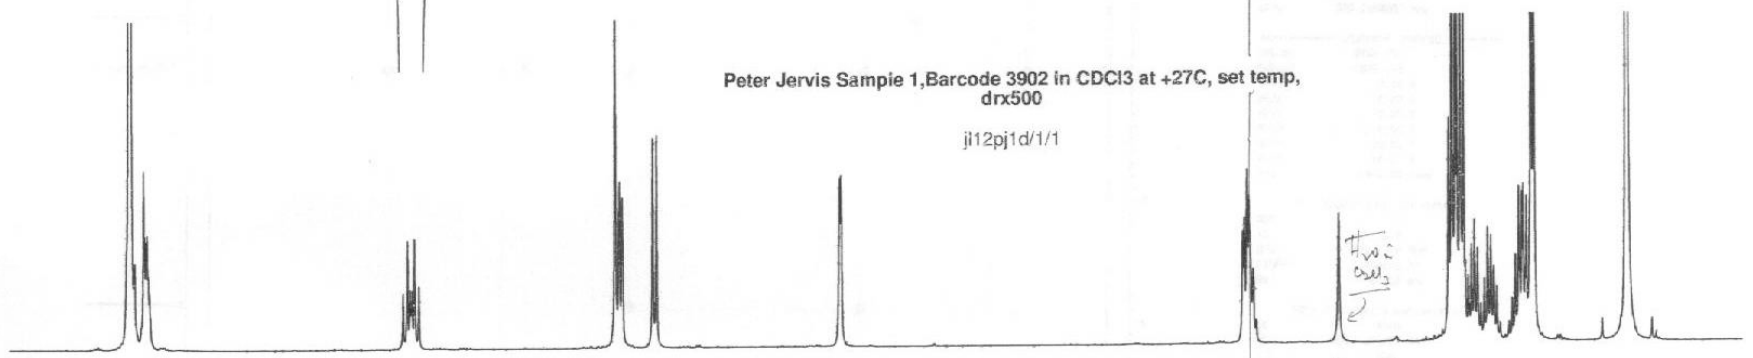

jl29pj1d/1/1  
same sample as jl12pj1d/1/1 above  
now with some degradation

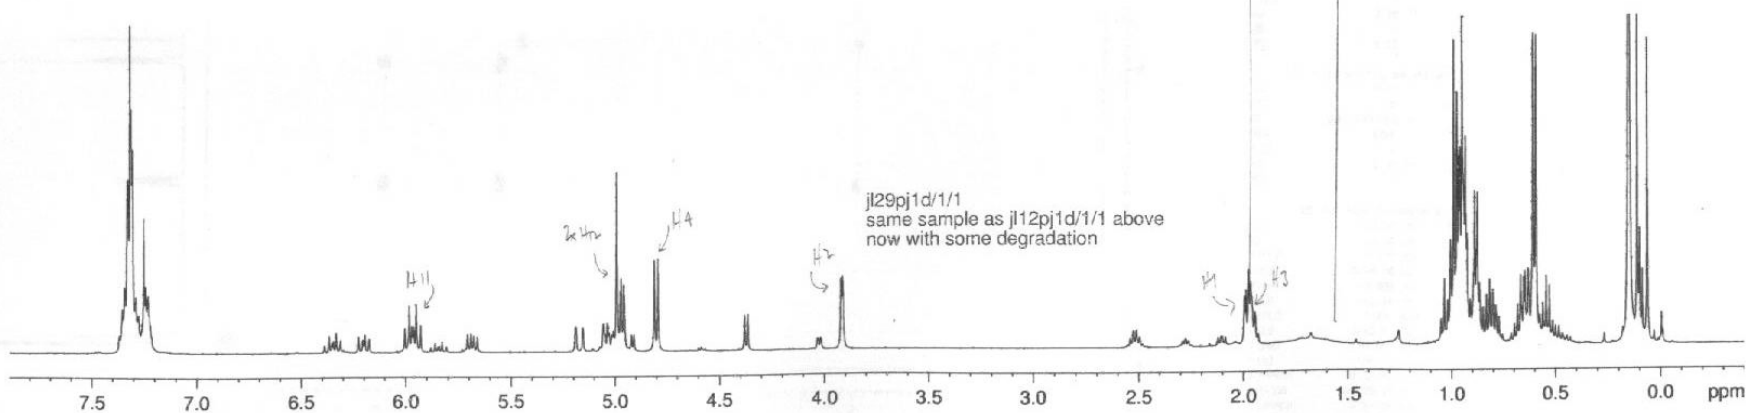

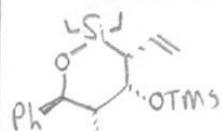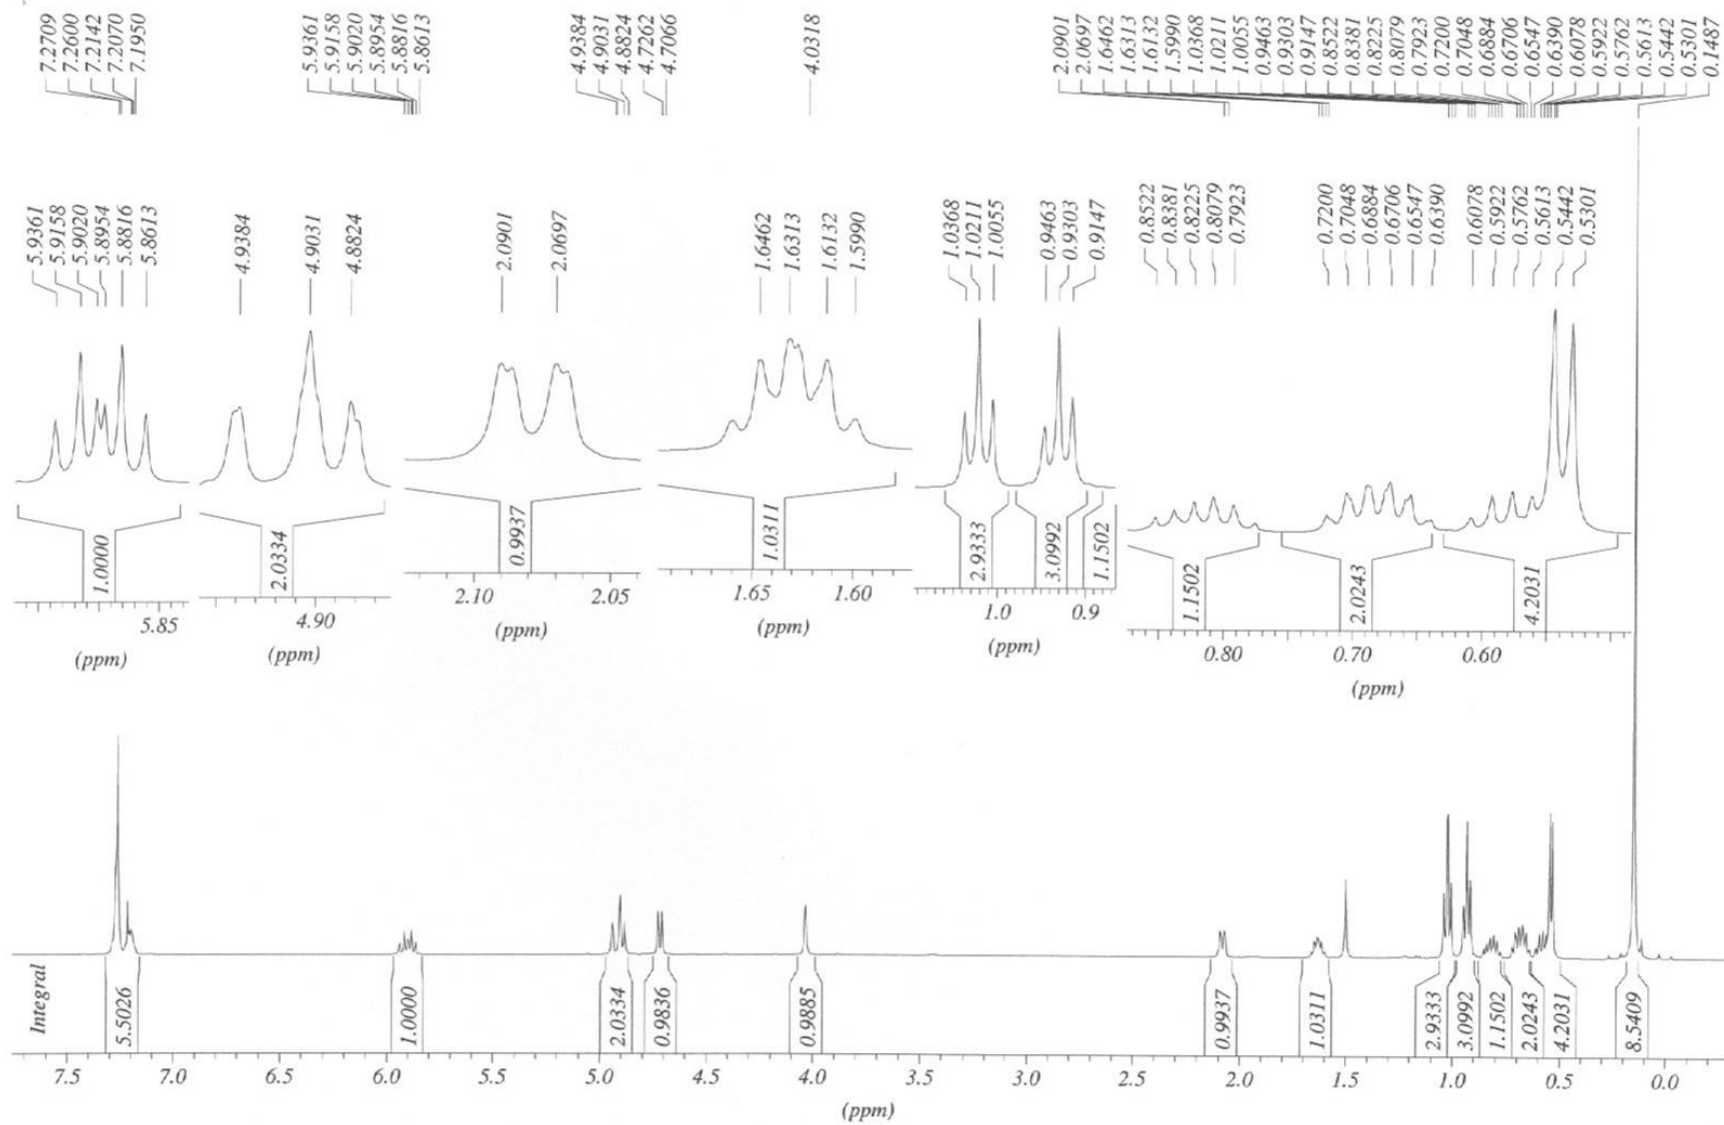

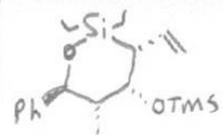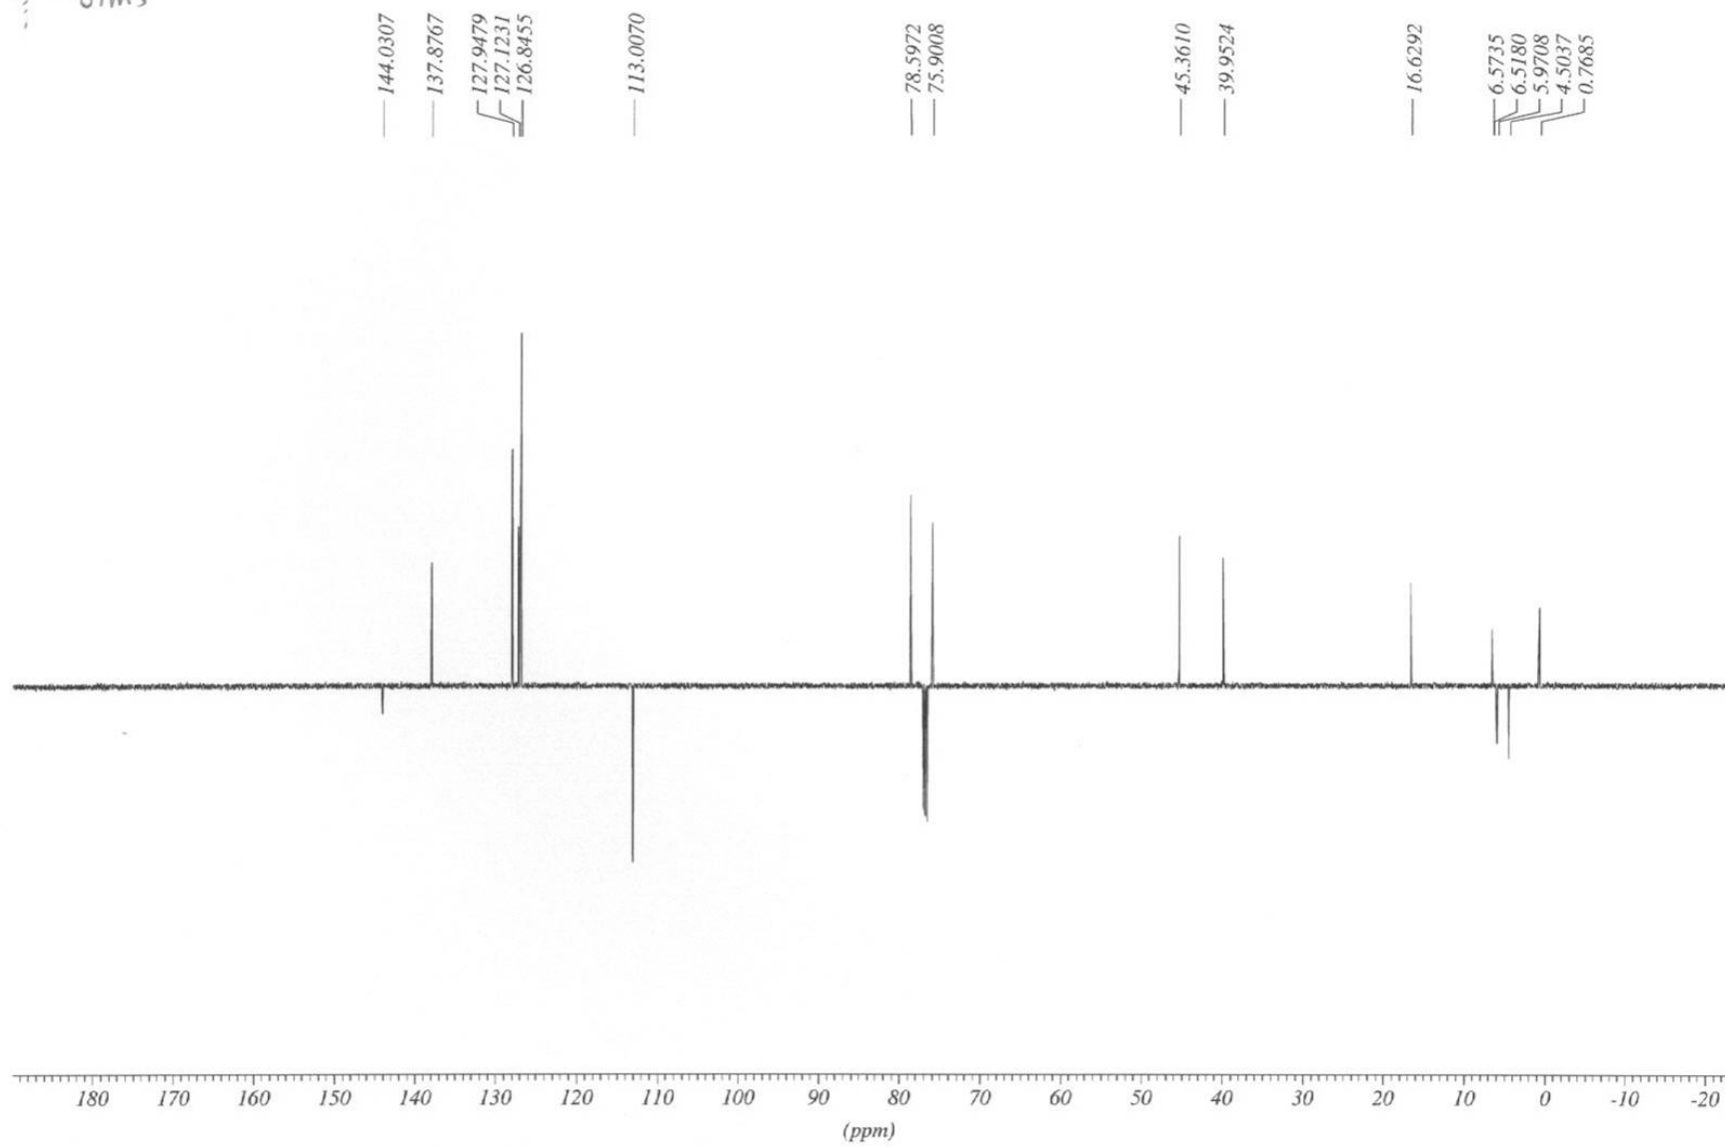

Peter Jarvis Sample 2, Barcode 3901 in CDCl3 at +27C, set temp  
drx500, Gradient HSGC

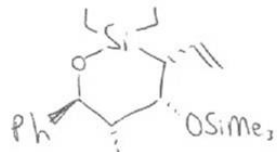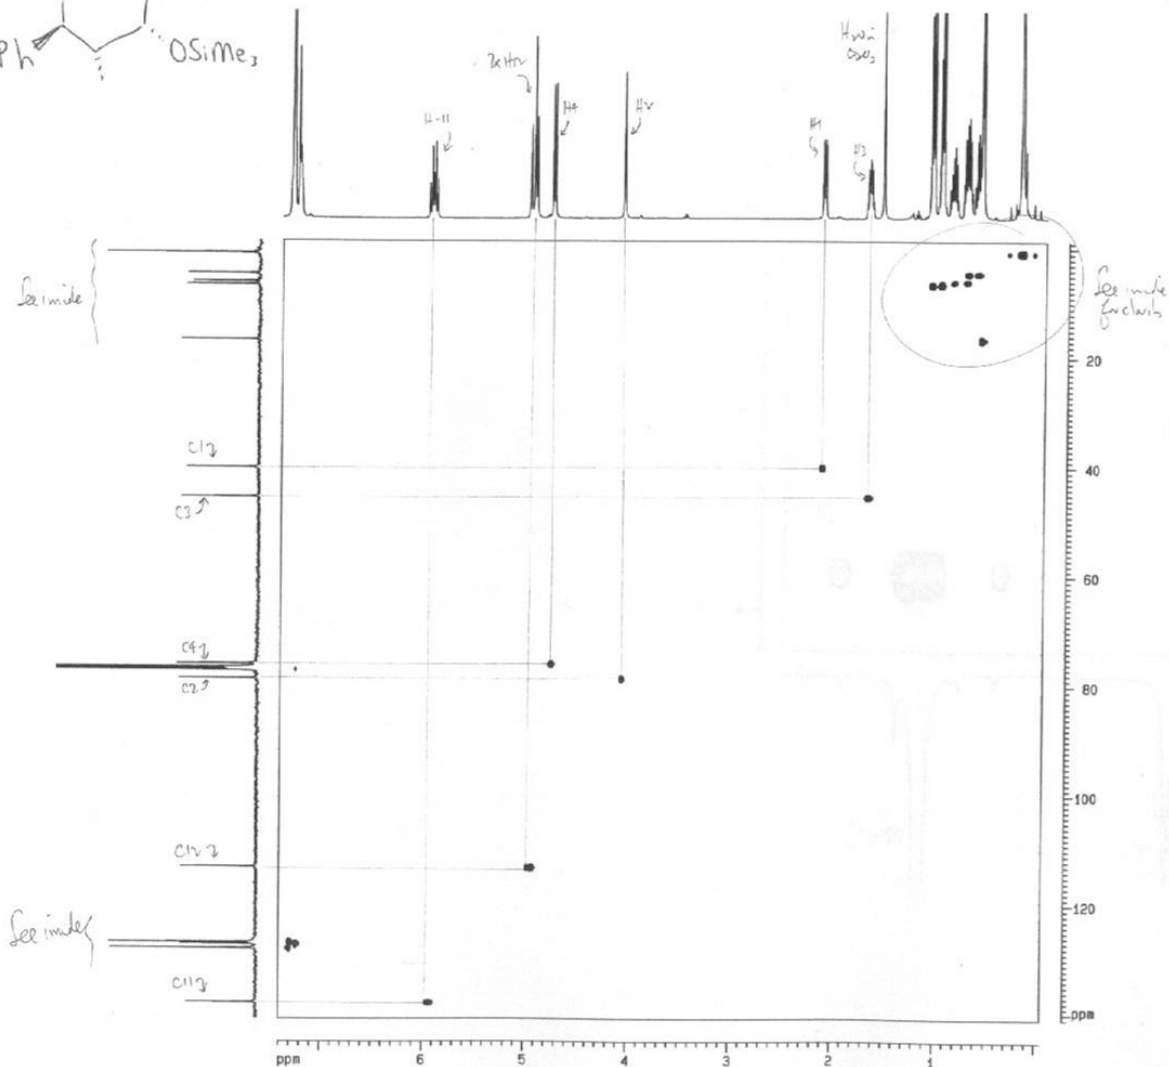

Current Data Parameters  
NAME 1106j112  
EXPNO 2  
PROCNO 1

F2 - Acquisition Parameters  
Date\_ 20050708  
Time 17.00  
INSTRUM drx500  
PROBHD 5 mm TBI H/C  
PULPROG invgpgp  
TO 20.40  
SOLVENT CDCl3  
NS 8  
DS 8  
SWH 431.345 Hz  
FIDRES 2.104661 Hz  
AQ 0.2376180 sec  
RG 32768  
CW 116.000 usec  
DE 5.50 usec  
TE 300.5 K  
CHET2 1.45.000000  
SFO 0.0000000 sec  
D1 2.0000000 sec  
d4 0.00172414 sec  
d11 0.03600000 sec  
d13 0.00000000 sec  
D16 0.00010000 sec  
SFO 0.00110000 sec  
d21 0.00061714 sec  
SFO 0.00001140 sec

CHANNEL F1  
NUC1 1H  
P1 10.70 usec  
p2 21.40 usec  
PL1 1.00 dB  
SFO1 500.1300233 MHz

CHANNEL F2  
CPDPRG2 gpgp  
NUC2 13C  
P3 12.00 usec  
p4 24.00 usec  
POPO2 76.00 usec  
PL2 -1.00 dB  
PL12 15.00 dB  
SFO2 125.7677945 MHz

GRADIENT CHANNEL  
SPHANS SINE 100  
SPHANS SINE 100  
SPHANS SINE 100  
SPK1 0.00 s  
SPK2 0.00 s  
SPK3 0.00 s  
SPK1 0.00 s  
SPK2 0.00 s  
SPK3 0.00 s  
SPZ1 80.00 s  
SPZ2 30.00 s  
SPZ3 20.00 s  
P16 1000.00 usec

F1 - Acquisition parameters  
NO 4  
TO 512  
SFO1 125.7680 MHz  
FIDRES 42.831688 Hz  
SW 174.360 ppm

F2 - Processing parameters  
SI 20.40  
SF 500.1300233 MHz  
WDW EM  
SSB 2  
LB 0.00 Hz  
GB 0  
PC 1.00

F1 - Processing parameters  
SI 1024  
NC 1024  
SF 125.7677945 MHz  
WDW EM  
SSB 2  
LB 0.00 Hz  
GB 0

2D NMR plot parameters  
CQ2 17.00 ca  
CX1 17.00 ca  
FBLD 7.464 ppm  
FLD 3765.83 Hz  
F2HC -0.027 ppm  
F2HI -28.83 Hz  
FPLD 141.005 ppm  
FLD 17736.50 Hz  
F2HC -1.361 ppm  
F2HI -171.14 Hz  
F2PNDH 0.43889 ppm/ca  
F2ZCH 219.50372 Hz/ca  
F2PNDK 8.31446 ppm/ca  
F2ZCH 1093.1564 Hz/ca

Peter Jervis Sample 2, Barcode 3901 in CDCl<sub>3</sub> at +27C, set temp  
drx500, Gradient HSGC

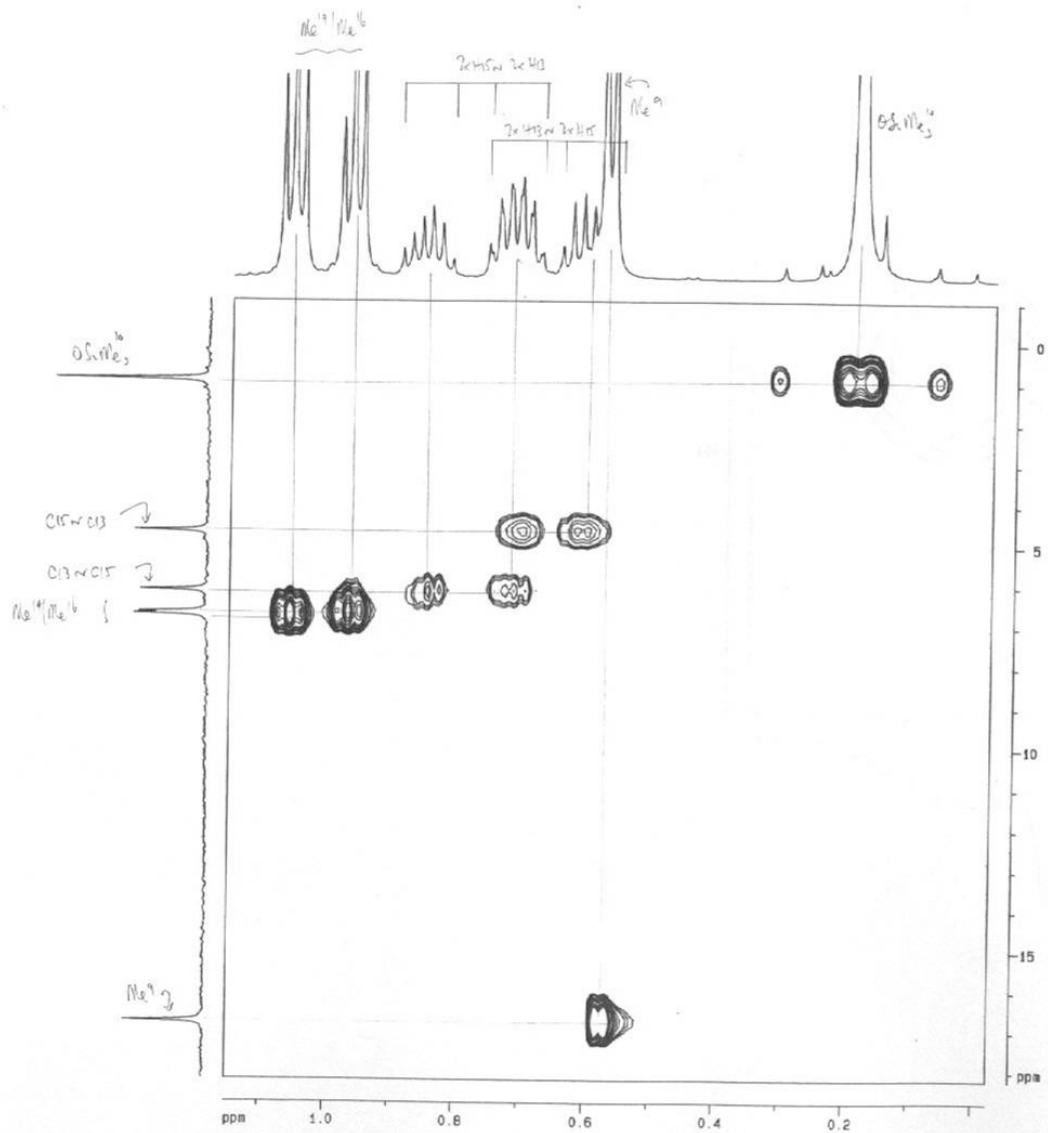



Peter Jarvis Sample 2, Barcode 3901 in CDCl3 at +27C, set temp  
drex500, Gradient HSQC

2x46?  
2x47?

au<sub>1</sub>

H8

2x46?

H8

2x47?

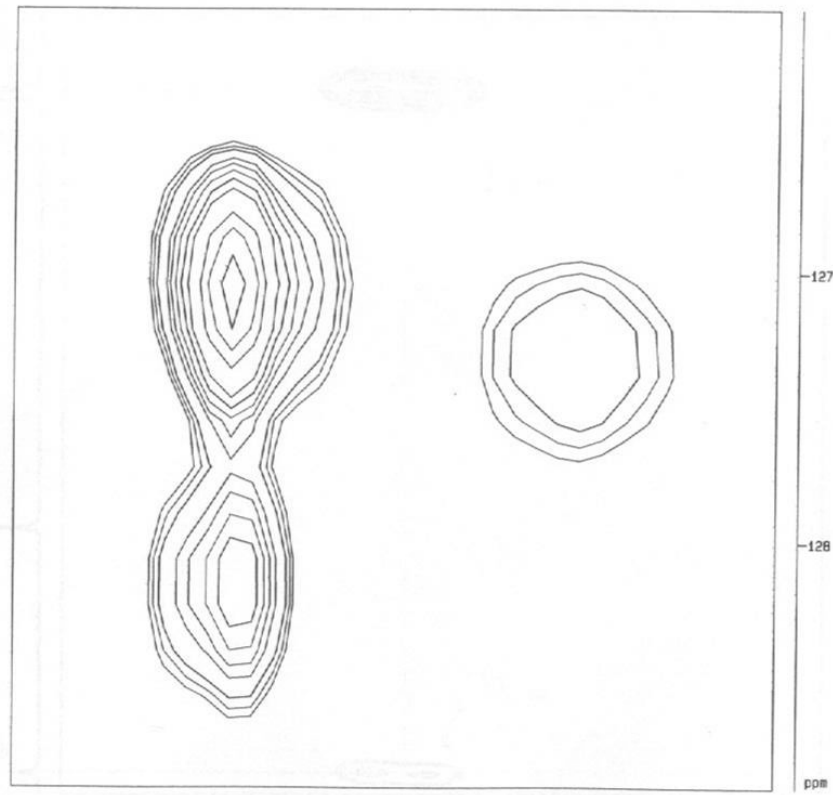

ppm 7.3 7.2

127

126

ppm

Peter Jervis Sample 2, Barcode 3901 in CDCl<sub>3</sub> at +27C, set temp  
drx500, Gradient HMBC

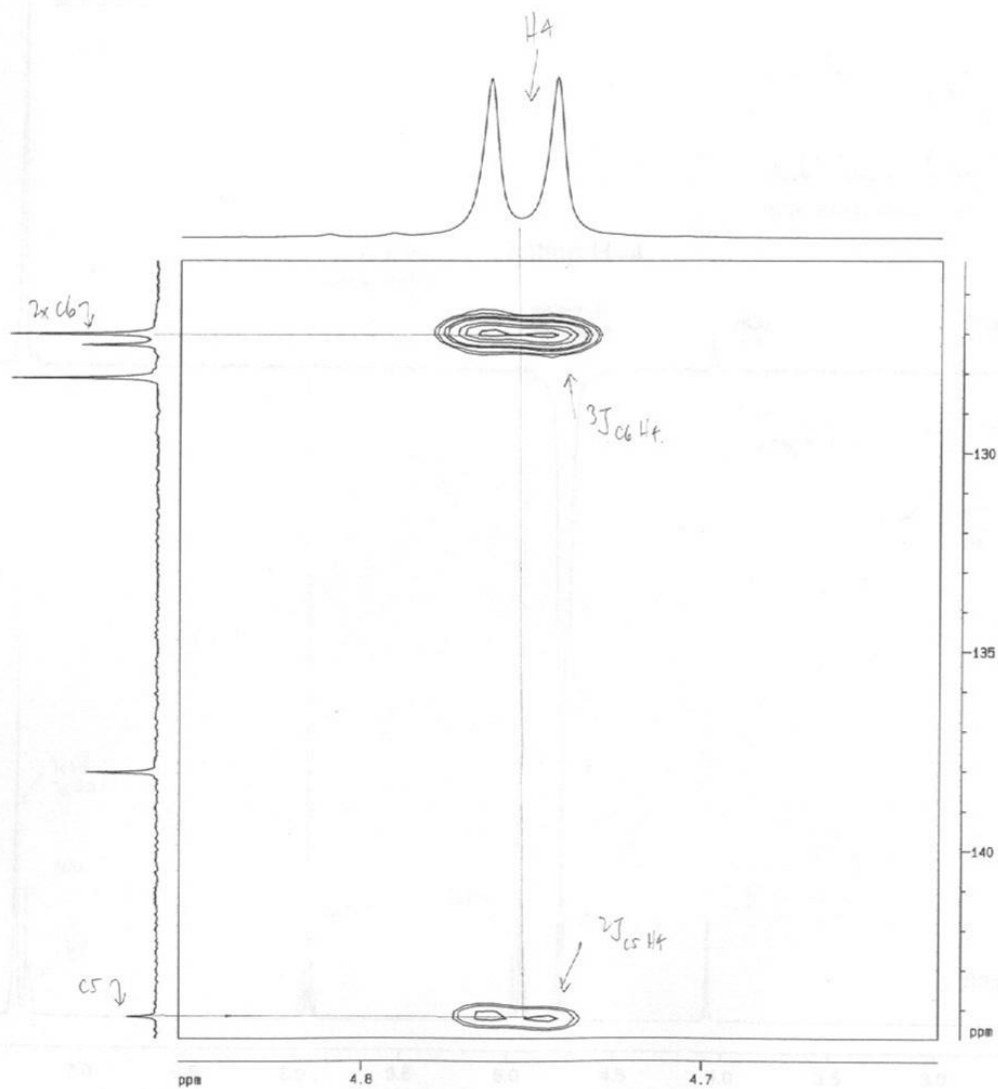

Current Data Parameters  
NAME 11060j1d  
EXPNO 3  
PROCNO 1

F2 - Acquisition Parameters  
Date\_ 20050705  
Time 19.44  
INSTRUM drx500  
PROBHD 5 mm TBI 1H/C  
PULPROG 1mr4g31z1rd  
TD 2048  
SOLVENT CDCl<sub>3</sub>  
NS 8  
DS 16  
SFR 4310.345 Hz  
WDW 2.104551 Hz  
AQ 0.2378160 sec  
RG 32788  
DM 116.000 usec  
DE 5.50 usec  
TE 300.0 K  
CST2 150.000000  
d0 0.0000300 sec  
d1 2.0000000 sec  
d2 0.00312500 sec  
d3 0.10000000 sec  
d4 0.0000300 sec  
d5 0.00010000 sec  
d6 0.00010000 sec  
d7 0.00002000 sec

CHANNEL f1  
NUC1 1H  
P1 16.70 usec  
p2 21.40 usec  
PL1 1.00 dB  
SFO1 500.13148957 MHz

CHANNEL f2  
NUC2 13C  
P3 12.00 usec  
PL2 -1.00 dB  
SFO2 125.7667993 MHz

GRADIENT CHANNEL  
GPMAN1 SINE,100  
GPMAN2 SINE,100  
GPMAN3 SINE,100  
GPK1 0.00 %  
GPK2 0.00 %  
GPK3 0.00 %  
GPF1 0.00 %  
GPF2 0.00 %  
GPF3 0.00 %  
GPZ1 50.00 %  
GPZ2 30.00 %  
GPZ3 40.10 %  
PI6 1000.00 usec

F1 - Acquisition parameters  
ND0 2  
TD 512  
SFO1 125.7668 MHz  
FIDRES 42.851598 Hz  
SN 174.359 ppm

F2 - Processing parameters  
SI 2048  
SF 500.1300233 MHz  
WDW 0SINE  
SSB 2  
LB 0.00 Hz  
GB 0  
PC 0.20

F1 - Processing parameters  
SI 1024  
WC2 9F  
SF 125.7577945 MHz  
WDW 0SINE  
SSB 2  
LB 0.00 Hz  
GB 0

2D NMR plot parameters  
CX2 17.00 cm  
CX1 17.00 cm  
F2PLD 4.854 ppm  
F2LO 2427.51 Hz  
F2PHI 4.631 ppm  
F2PC 2315.96 Hz  
F1PLD 144.752 ppm  
F1LO 8823.80 Hz  
F1PHI 125.158 ppm  
F1PC 15740.83 Hz  
F2PPMCH 0.01312 ppm/cm  
F2QCCH 6.56156 Hz/cm  
F1PPMCH 1.15199 ppm/cm  
F1QCCH 144.87190 Hz/cm

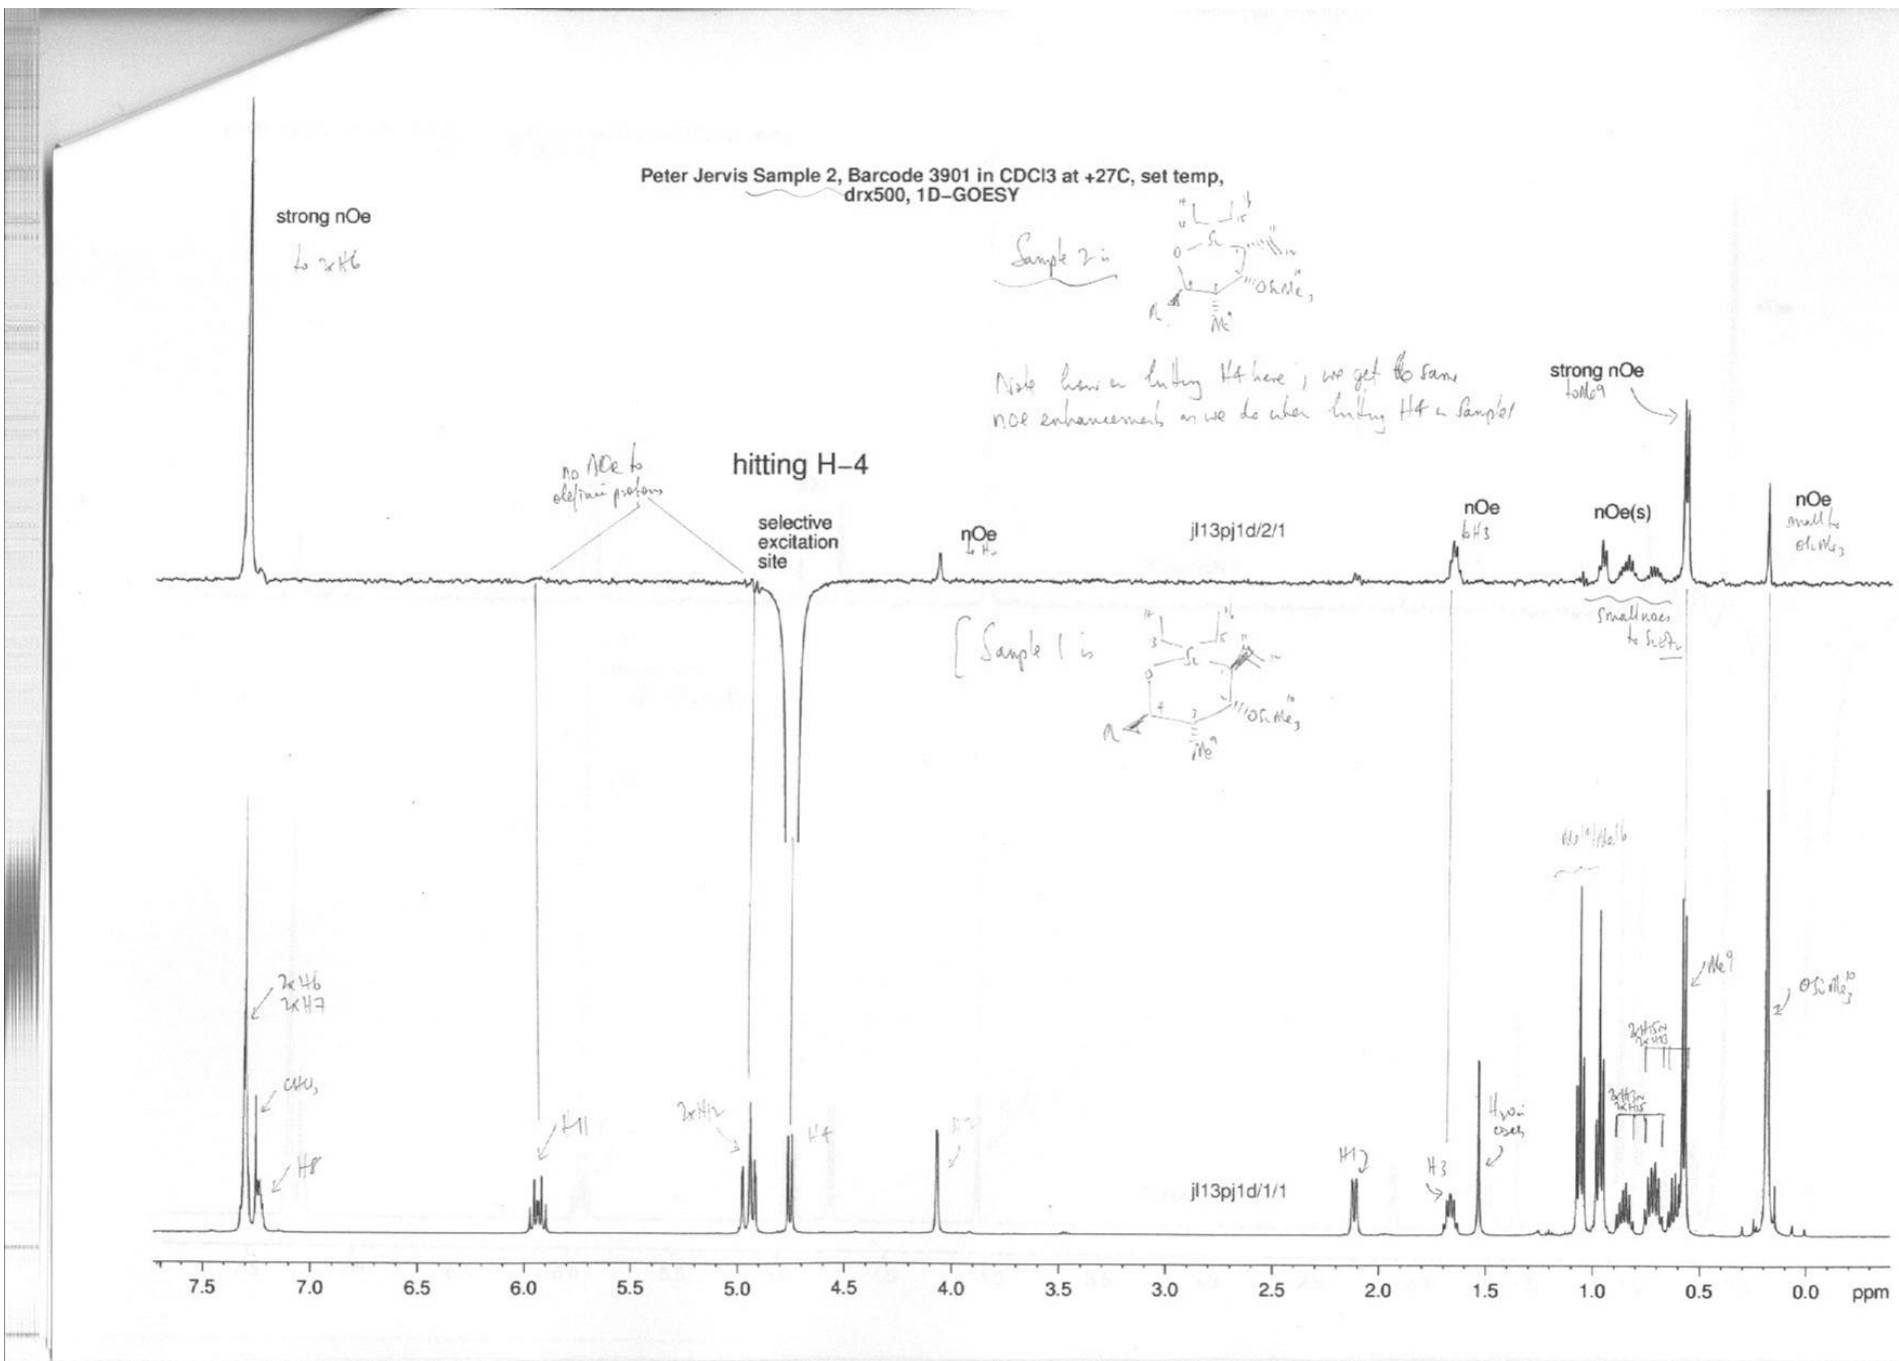

Peter Jervis Sample 2, Barcode 3901 in CDCl<sub>3</sub> at +27°C, set temp,  
drx500, 1D-GOESY

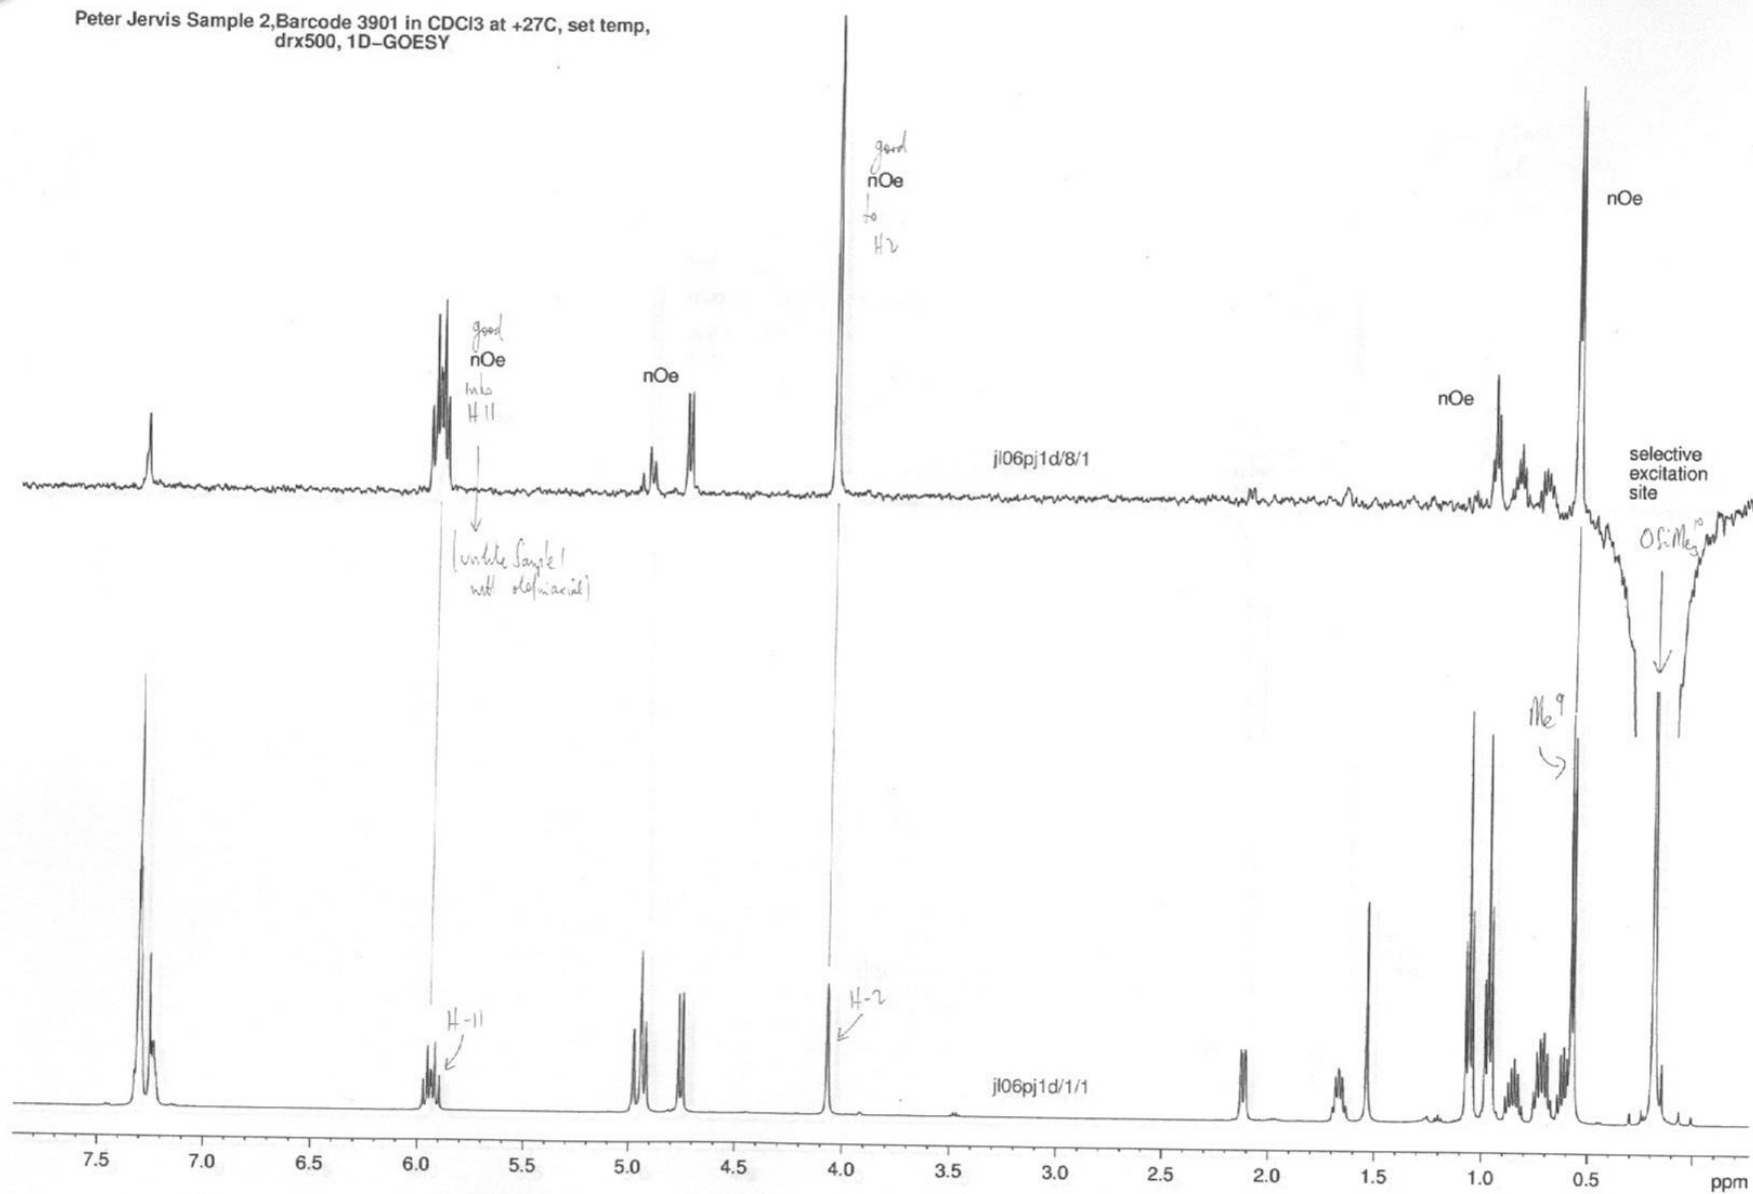

Peter Jarvis Sample 2, Barcode 3901 in CDCl<sub>3</sub> at +27°C, set temp,  
drx500, 1D-GOESY

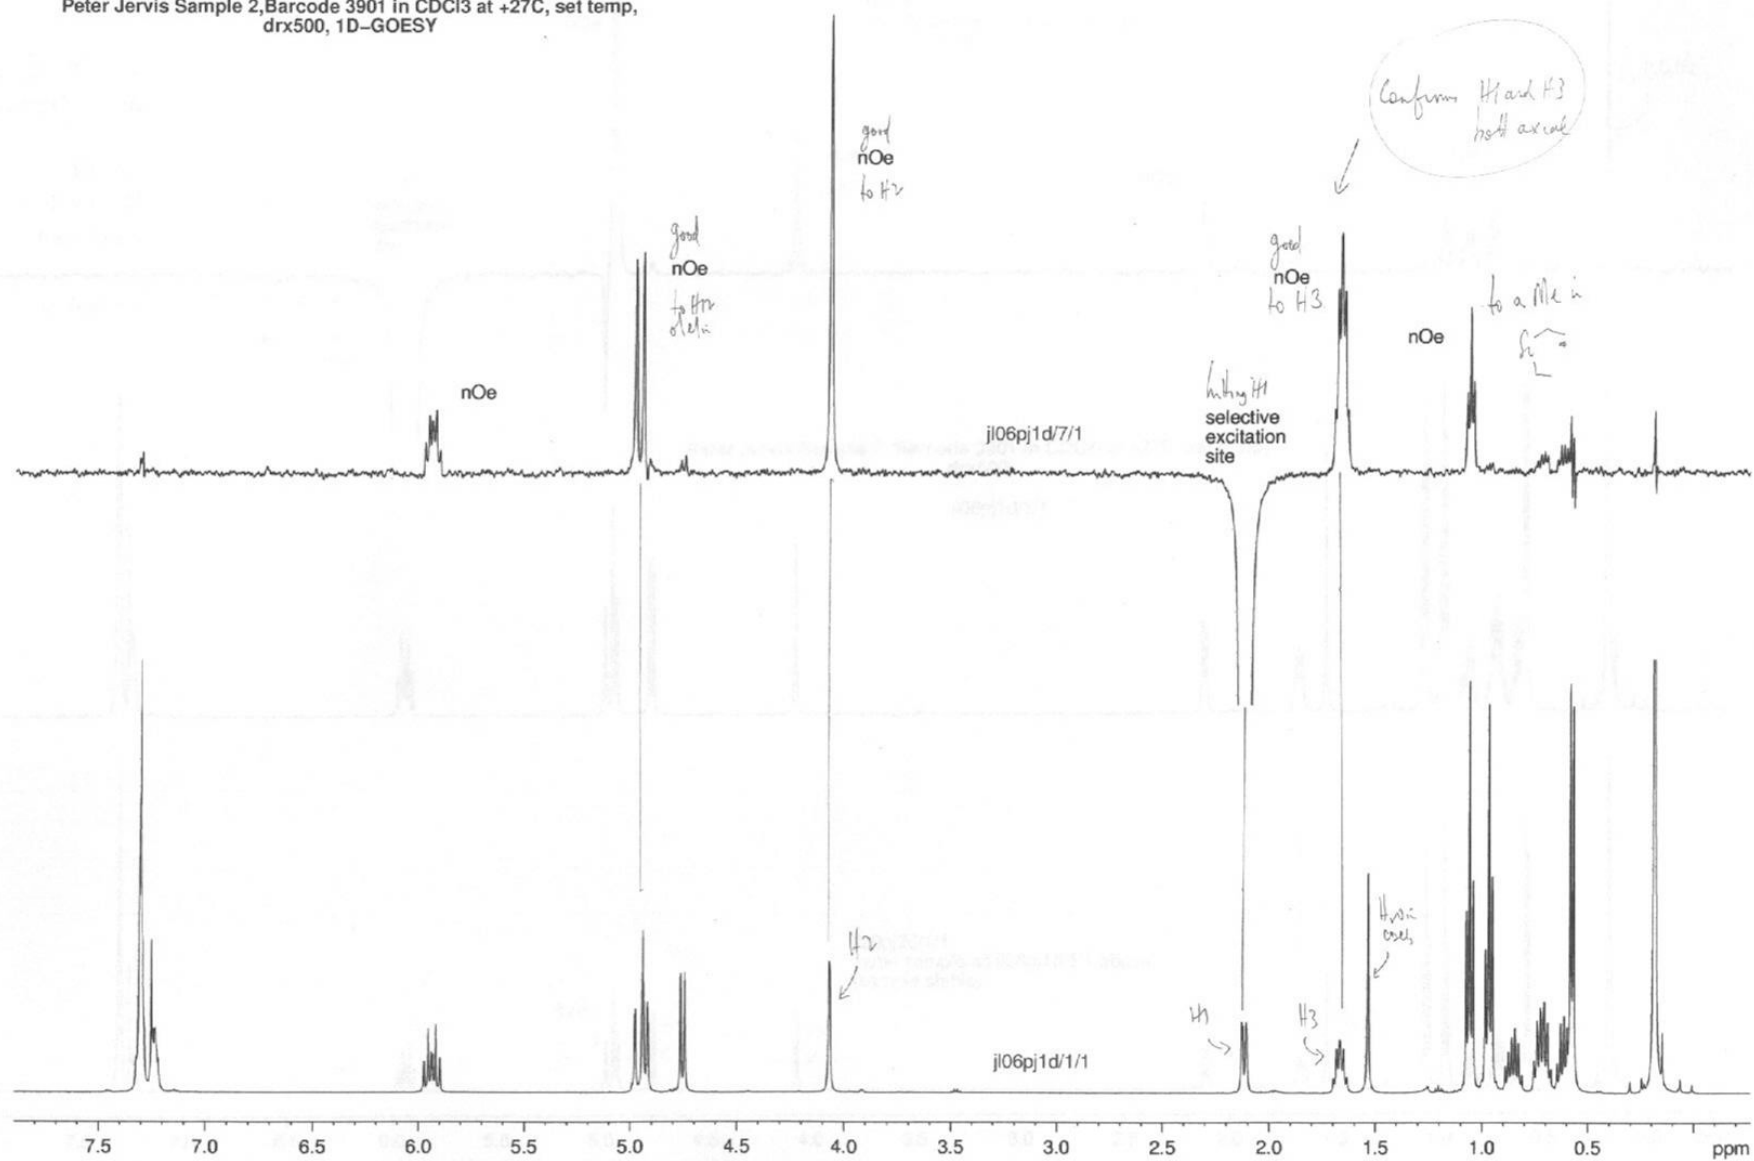

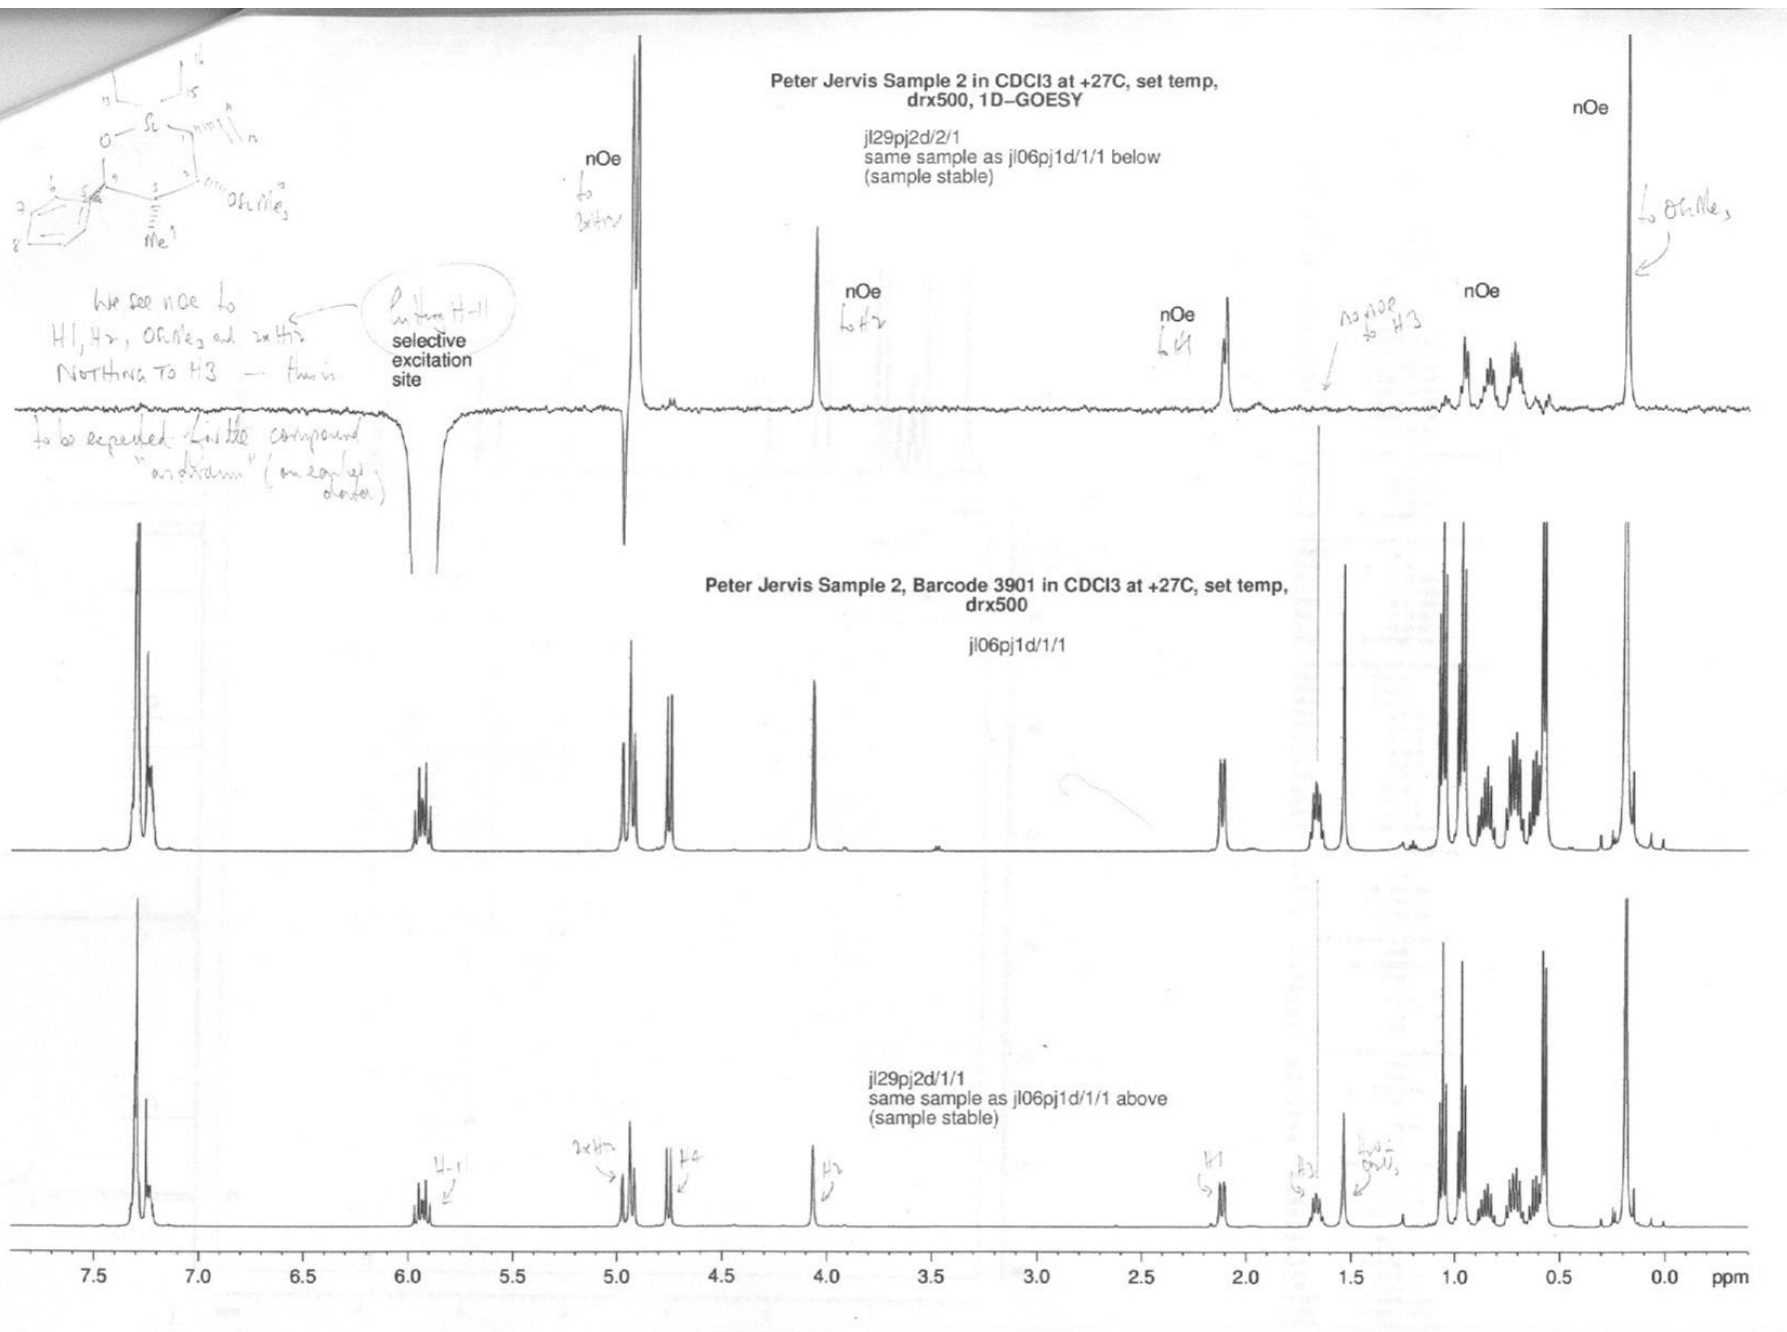

Supplement: Beilstein_J_Org_Chem-03-06-s008.pdf [file Beilstein_J_Org_Chem-03-06-s008.pdf]
